# Supplementary material for: Cell-Cycle Dependent Expression of a Translocation-Mediated Fusion Oncogene Mediates Checkpoint Adaptation in Rhabdomyosarcoma
Source: PLoS Genet. 2014 Jan 16;10(1):e1004107. doi: 10.1371/journal.pgen.1004107 (PMC3894165; doi:10.1371/journal.pgen.1004107)
Supplement: Table S1 — Genome-wide expression analysis using cell cycle specific sorted cells (2N vs 4N) with or without Pax3:Foxo1a knockdown. (XLSX) [file pgen.1004107.s005.xlsx]

## Sheet: Table S1
	Table S1. Genome-wide expression analysis using cell cycle specific sorted cells (2N vs 4N) with or without Pax3:Foxo1a knockdown.
			Control (Pax3:Foxo1a allowed on)				knock down of Pax3:Foxo1a
			2N		4N		2N		4N
	Gene ID	Gene Identifier	mean	SEM	mean	SEM	mean	SEM	mean	SEM
	Car3	NM_007606	376	48.7689	391.567	35.2625	3877.1	487.292	4241.07	418.169
	Nusap1	NM_133851	892.167	104.208	8069.13	294.817	744.4	72.7517	7378.13	56.2226
	Acta1	NM_009606	933.4	144.427	1075.23	140.716	5622.5	853.477	6761.17	351.889
	Igfbp2	NM_008342	605.2	61.6049	723.033	124.954	3435.4	282.054	4274.07	174.563
	Actg2	NM_009610	1707.93	223.663	2121.37	337.482	9614.8	1209.44	10663.9	811.004
	Igfbp2	NM_008342	366.833	62.0333	391.9	50.1091	1983.3	322.242	2424.5	62.5807
	Ube2c	NM_026785	286.933	45.2817	2020.87	379.783	263.133	42.1246	2042.23	389.104
	Inhba	NM_007554	219.7	23.343	221.933	15.1338	1200.47	42.7545	1296.3	58.1488
	Itga11	NM_176922	211.733	30.4097	223.733	33.3173	1057.47	219.285	1277.17	194.555
	Prc1	NM_145150	1903.57	119.414	12515.5	421.73	1783.3	213.089	12243.9	390.127
	Pif1	NM_172453	305.633	12.5186	1481.5	105.92	336.4	21.9887	1821.83	123.851
	Acta2	NM_007392	5143.5	953.042	6585.83	1535.89	25317.4	3144.41	28242.5	1086.38
	Aurka	NM_011497	1024.6	83.1892	7038.87	258.23	925.1	61.7367	6055.23	69.4437
	Ogn	NM_008760	194.3	8.47014	177.667	1.8169	1534.1	108.649	881.233	50.0345
	Ccnb1	NM_172301	2510	270.48	16322.4	479.772	1759.23	148.605	14437.5	598.685
	Acta2	NM_007392	4419.63	1035.95	5007.93	976.635	19687.7	3006.19	23056.7	2062.57
	Ccnb1	NM_172301	2538.57	205.024	16150	828.571	1789.63	125.927	14086.5	466.937
	Acta2	NM_007392	5542.63	594.097	6457.27	698.555	23655.4	1686	25820.6	1656.76
	Actc1	NM_009608	831	160.562	1192.6	179.695	3143.73	372.464	3707.17	183.7
	Cxcl12	NM_013655	549.467	36.7891	471.033	22.6628	3030.47	62.9703	2820.23	291.253
	Actc1	NM_009608	315.867	64.3882	473.733	95.6711	1154.47	208.417	1316.67	113.801
	1110032E23Rik	NM_133187	168.8	16.4344	226.467	22.7134	495.733	56.3189	796.867	69.8823
	Lox	NM_010728	170.467	9.83638	170.7	5.51392	660.867	92.9185	681.667	56.6234
	Tagln	NM_011526	290.5	29.0331	349.167	25.1929	1084.8	141.647	1140.73	55.6112
	Spc25	NM_025565	861.367	39.456	3260.8	137.869	898.6	18.4218	3459.93	48.8257
	Adamts4	NM_172845	389.067	54.8268	368.4	46.3155	1858.1	334.162	1951.23	204.588
	Pdlim3	NM_016798	821.133	142.268	1041.97	145.365	2844.9	392.049	3269.33	262.867
	D0H4S114	NM_053078	484.867	45.9218	490.067	65.6181	1932.7	237.524	1669.23	278.244
	Prnd	NM_023043	184.033	7.73527	236.167	27.5177	524.567	79.9584	766.833	108.308
	Ptx3	NM_008987	383.9	59.4194	474.433	108.02	1233.03	224.964	1429.8	184.193
	Ptx3	NM_008987	420.833	86.3416	487.8	116.521	1337.23	229.173	1606.8	197.966
	Cep55	NM_028760	533.7	26.5801	1658.73	165.815	616.7	40.7083	2068.27	140.867
	Pdlim3	NM_016798	250.867	37.595	313.4	22.2083	772.2	120.201	928.867	92.5625
	Nusap1	NM_133851	145.667	8.31592	522.933	50.3575	147.767	9.50164	474.933	5.12196
	Pdlim4	NM_019417	415.3	29.5014	479.133	52.6376	1205.13	182.842	1449.03	272.82
	Top2a	NM_011623	1269	96.657	5918.07	304.324	949.7	61.1925	5198	81.5279
	Kpna2	NM_010655	452.1	44.8228	2016.63	228.042	402.867	42.069	1820.63	102.892
	-	NM_146058	533.967	82.2996	613.433	105.426	1467.2	264.59	1812.33	270.694
	Ccl7	NM_013654	128.9	7.48398	134.3	6.26605	356.967	31.8123	447.633	41.7755
	St5	NM_029811	1512.77	147.067	1687.87	72.5391	4696.17	58.3682	4541.23	248.335
	Tgfbi	NM_009369	305.033	22.4682	300.533	14.2626	1467.3	185.432	1010.03	140.809
	Olfml2b	NM_177068	1570.23	179.037	1597.13	148.871	4667	590.893	4891.4	432.601
	Fzr1	NM_019757	2271.13	66.9228	6813.9	197.979	2488.53	153.826	6487.13	150.337
	Wisp1	NM_018865	2259.73	407.176	2835.67	334.893	5767.03	509.997	7088.5	480.266
	Hspa1a	NM_010479	177.833	6.0938	176.3	7.03776	714.633	66.0312	697.067	94.0709
	Artn	NM_009711	252.3	13.7158	317.6	10.641	627.633	60.7746	780.367	57.779
	Usp18	NM_011909	164.067	3.4031	170.467	10.0002	405.633	28.5301	542.7	21.4398
	Artn	NM_009711	361.767	39.3914	452.367	32.2853	910.833	67.232	1103.3	69.2636
	Cdkn1c	NM_009876	1149.9	17.65	1287.23	118.241	3242.57	281.909	3175.63	210.514
	Fzd2	NM_020510	244.767	15.6542	354.467	17.4702	555.733	40.8226	726.933	20.3883
	Rsad2	NM_021384	152.3	2.88675	177.3	5.12933	297.433	15.572	534.367	31.7871
	Nuak1	NM_001004363	249.7	4.92172	254.9	16.709	625	33.9797	748.7	31.5035
	Fzr1	NM_019757	652.067	27.6087	1787.53	20.2999	696.333	42.9755	1765.67	38.6214
	Depdc1b	NM_178683	151.133	1.73429	681.067	16.721	135.233	2.77629	471.467	12.9185
	Cenpl	NM_027429	504.033	36.2551	1985.43	196.993	471.567	15.6607	1833.63	83.7704
	-	NM_146058	345.2	50.6137	358.767	44.2229	806.167	106.814	1080.53	171.344
	Cyp1b1	NM_009994	1396.8	233.456	1559.47	186.909	3791.17	183.205	3720.83	231.308
	-	XM_283661	479.433	18.3759	1898.9	181.385	432.067	32.732	1741.03	55.66
	Krt14	NM_016958	341.667	25.8171	346.6	51.9836	853.1	87.8649	1011.27	77.3599
	Spc25	NM_025565	917.3	23.7921	3328.5	110.26	893.867	34.9014	3547.87	94.8596
	Oasl2	NM_011854	161.133	2.89041	212.467	15.3095	346.833	10.497	472.567	5.22951
	Dkk3	NM_015814	218.833	13.4721	236	23.4558	646.2	78.4959	514.967	70.6323
	Gtse1	NM_013882	873.867	39.2986	3313.63	96.7842	810.3	38.7637	3183.77	118.073
	Tnnt3	NM_011620	226.533	17.386	239.733	13.7045	568.767	70.2362	623.5	62.0195
	Olfml3	NM_133859	464.233	18.0734	462.1	14.1656	1788.93	48.9038	1597.07	173.821
	C79407	NM_172578	279.333	11.9742	1217.2	97.8513	234.833	14.2022	871.467	34.2523
	Irf1	NM_008390	1474.87	93.2033	1581.6	162.295	3597.8	46.1598	4079.67	149.698
	Stard13	NM_146258	291.967	27.7158	347.467	8.71863	725.2	58.7192	755.867	19.3977
	3000004C01Rik	NM_197959	597.1	12.0826	2452.87	19.5183	431.767	19.8771	2101.43	63.2699
	Runx1t1	NM_009822	156.467	9.91805	157.933	14.6051	429.533	15.1026	389.433	23.4625
	3000004C01Rik	NM_197959	438.233	9.16012	1743.53	48.5196	347.2	13.7609	1532.7	46.5224
	Col8a2	NM_199473	155.333	3.86192	158.767	5.94904	413.067	62.2903	379.2	16.3741
	Kif11	NM_010615	481.267	10.5681	1919.87	50.5526	400	19.6291	1582.93	20.032
	Cdc2a	NM_007659	1671.63	74.5279	6590.53	275.837	1305.83	78.941	5670.7	279.365
	Krt7	NM_033073	468.567	27.317	570.9	11.7936	918.6	4.2194	1344.03	17.5667
	Cd200	NM_010818	135.1	4.68081	148.067	8.89688	314.933	38.5167	352.167	30.2991
	H1f0	NM_008197	843.2	54.5419	1987.63	124.442	1018.9	66.0359	2058.8	327.614
	Gulp1	NM_028450	117.833	5.54417	123.133	2.11056	313.9	43.6423	266.633	18.4547
	Fas	NM_007987	143.9	6.39296	157.067	4.55131	341.5	43.3419	349.5	37.4468
	Tceal8	NM_025703	2086.73	49.3747	2419.47	85.6748	4563.03	252.512	5313.77	166.513
	Kif18a	NM_139303	671.267	53.4655	2699.53	291.543	489.2	51.4375	2143.8	161.371
	Cav1	NM_007616	4121.17	538.098	4755.4	803.216	8890.37	1044.05	10278.6	745.077
	Rerg	NM_181988	221	20.7162	221.633	17.6415	586.067	82.4395	471.533	53.6423
	Dkk3	NM_015814	219.933	5.12326	221.1	18.1055	583.667	76.1983	449.367	68.0186
	Gbp3	NM_018734	161.1	2.36432	175.233	7.05132	307.567	15.6587	434.9	12.0674
	Bex4	NM_212457	492.833	18.8392	575.5	50.5143	867.367	36.9239	1333.93	24.0461
	Irak2	NM_172161	777.433	62.474	827.233	67.8367	1722.13	117.395	1812.67	101.442
	Ddit4	NM_029083	997.3	7.15262	1168.1	66.5509	1986.47	228.309	2414.63	122.423
	D4Wsu114e	NM_001025365	242.467	10.3437	592.3	48.329	252.6	8.8636	508.767	38.6588
	-	XM_131404	202.533	8.99895	708.9	59.0102	189.2	21.6002	634.367	30.6686
	Lmcd1	NM_144799	519.533	24.3673	669.7	60.7133	1007.73	75.2887	1181.93	101.11
	Fam110a	NM_146127	386.333	23.6464	877.9	39.5137	432.167	25.3242	815.633	40.7847
	Cdca2	NM_175384	690	10.3317	2557.77	109.653	528.933	58.5149	2120.27	40.1801
	Smtn	NM_013870	503.6	14.4503	1005.07	81.5755	635.233	22.7393	1115.57	35.8364
	Smtn	NM_013870	375.9	30.5413	751.533	46.9601	493.333	19.7844	811.967	24.4247
	Usp18	NM_011909	139	7.91981	140.067	4.16106	261.9	11.0014	354	9.94853
	Zfp521	NM_145492	509.533	74.7371	576.167	69.0292	1064.07	138.742	1129.4	92.9467
	Htra1	NM_019564	2024	374.353	2039.73	103.3	4288	450.076	4662.1	186.062
	C79407	NM_172578	340.767	17.8066	1324.53	102.229	268.2	27.1605	958.233	21.4633
	Gtse1	NM_013882	341.7	31.6076	1203.07	35.4796	299.267	9.4351	1041.6	47.286
	Asb4	NM_023048	221.733	29.1142	257.667	19.5271	440.167	26.0454	504.867	45.2582
	Snai1	NM_011427	895.6	146.059	907.667	101.194	1942	142.549	2006.33	196.109
	Vdr	NM_009504	142.233	4.22466	152.133	5.22058	343.867	32.4412	275	11.6065
	Unc84b	NM_194342	3341.4	253.686	5618.67	264.275	4802.5	145.111	7679.8	209.52
	Tsga14	NM_031998	647.2	24.9548	876.433	31.9075	1178.67	106.671	1436.33	95.6715
	Col3a1	NM_009930	1831.53	171.664	2111.33	335.427	3898.8	416.613	3857.63	355.071
	Ccdc68	NM_201362	386.8	28.3194	533.6	36.4259	591.333	86.937	950.533	114.726
	Loxl1	NM_010729	496.267	44.849	538.9	25.0668	1123.5	68.4161	991.7	50.0663
	Tnni2	NM_009405	309.4	26.2001	378.867	32.1467	552.4	45.581	722.4	79.2421
	Eppk1	NM_144848	395.667	14.7201	549.767	31.0199	715.1	64.8378	846.6	21.3854
	Tuba3a	NM_009446	356.3	33.6866	659.433	7.67362	441.567	37.7093	791.667	82.0428
	-	NM_183274	24659.9	4247.49	26352.2	3433.63	51972.2	1015.12	51946.4	2431.76
	Kif2c	NM_134471	631.5	52.2222	2167.8	100.979	539.933	25.7812	1901.67	76.4566
	Csrp1	NM_007791	5331.57	355.05	6017.17	573.985	10307.7	228.97	11747.3	929.16
	Inhba	NM_008380	530.733	92.7693	382.4	56.7585	1818.1	210.762	1703.7	213.772
	Thbd	NM_009378	128.333	4.05353	130.533	1.06823	262.9	30.8538	280.033	14.4446
	Irak2	NM_172161	728.733	56.2116	737.7	46.3211	1458.87	97.465	1621.3	154.499
	Fas	NM_007987	180.6	15.837	180.533	16.9113	569.433	70.6999	556.567	52.9927
	Pmp22	NM_008885	742.667	22.9949	890.833	62.1318	1419.37	146.211	1554.93	96.8202
	Slc24a3	NM_053195	1288.77	100.059	1414.63	29.3772	2542.8	144.905	2720.03	65.1428
	-	XM_196007	1718.67	128.296	1590.9	11.9887	4983.17	160.981	5770.5	163.892
	Vdr	NM_009504	138.7	7.82389	138.767	5.67049	302.333	22.4336	276.8	11.0024
	Bex1	NM_009052	215.167	25.8821	258.7	25.2508	346.2	40.0757	507.067	60.0525
	Nfatc4	NM_023699	226.7	19.3714	263.3	17.5872	467.567	30.2207	438.467	34.5594
	Rspo2	NM_172815	506.067	29.1029	597.933	47.8402	955.967	85.841	1054.97	46.7369
	Ckap2l	NM_181589	344.467	7.87831	1053.87	86.0641	303.433	21.0272	1112	22.117
	Gpr176	NM_201367	2058.07	401.952	2262.9	346.429	3688.43	427.383	4643.13	382.01
	Ubtd2	NM_173784	355.033	10.6692	385.633	46.944	730.5	46.3209	699.9	75.2008
	Stk17b	NM_133810	684.367	33.4943	938.6	13.8897	1176.27	80.2533	1378.47	19.7442
	Plscr2	NM_008880	163.633	6.91721	164.5	9.25797	283.5	24.9127	386.533	26.9732
	Rbms3	NM_178660	997.9	23.1	1392.17	50.8559	1762.07	86.0716	1933.37	142.912
	Lmcd1	NM_144799	331.767	10.5975	425.133	5.48948	597.533	26.5696	660.733	21.4548
	Nnat	NM_010923	260.7	28.2631	252.2	8.57049	738.6	44.3098	846.267	32.5732
	Pnrc2	NM_026383	1990.43	149.742	3925.57	323.261	2175.43	98.709	3926.03	232.944
	Syt11	NM_018804	893.733	77.4012	1266.27	45.1066	1438.1	78.9373	1795.53	112.474
	Ly6f	NM_008530	223.567	14.9439	242.433	14.4611	374.7	19.8102	503.333	30.8918
	Pla1a	NM_134102	438.933	56.6834	479.467	27.2736	785.4	54.5451	924.533	53.5032
	Gbp3	NM_018734	157.633	3.83507	186.767	8.01589	254.833	10.9621	344.433	30.0979
	Sap30	NM_021788	1551.1	79.5419	2066.73	166.575	2458.67	195.193	3206.63	79.0194
	Olfr56	NM_008330	271.633	9.12694	303.067	6.33938	468.967	41.1793	580.733	24.7223
	Parp14	NM_001039530	122.467	10.0187	123.933	3.86667	218.833	2.48484	266.3	3.98037
	Bex2	NM_009749	749.033	46.1834	777.667	71.1211	1343.6	14.0358	1592.87	95.0057
	Sema5a	NM_009154	533.367	42.0958	681.467	91.486	1074.8	82.3741	886.933	78.8816
	Ifi27l1	NM_026790	2169.8	48.8771	2128.77	68.3802	6624.33	162.457	6324.53	171.082
	Lsp1	NM_019391	349.033	9.57328	400.3	14.8637	605.133	85.0323	711.567	45.4077
	Isg15	NM_015783	481.367	3.57833	525.267	43.947	785.9	33.4838	1051.27	77.3826
	Cenpt	NM_177150	1450.03	46.8403	2237.33	121.641	1933.1	57.2946	2938.87	156.455
	Ssbp3	NM_198438	1885.43	107.474	2040.3	102.307	3644.27	154.28	3555.57	106.523
	Fam132b	NM_173395	1148.5	74.446	1662.87	94.0915	1369.7	145.999	2592.57	160.095
	Wbp5	NM_011712	5583.7	165.757	5891.53	120.064	10070.4	603.673	11384.4	546.324
	Atoh8	NM_153778	203.533	14.2322	301.7	10.2211	281.133	3.21887	405.933	5.98034
	Akap12	NM_031185	683.433	115.484	587.5	63.4859	2133.83	265.101	1972.4	81.2354
	Gpr19	NM_008157	312.8	7.30502	378.733	8.98041	564.833	15.5411	569.133	31.7209
	Nid2	NM_008695	3619.17	680.783	3707.67	436.501	6827.23	735.775	6966.53	267.72
	Fam169b	NM_001013811	216.8	8.60252	240.167	10.8361	367.967	32.1161	440.033	56.3496
	Cryab	NM_009964	1915.97	47.1832	2172.6	208.872	3329.73	198.077	3743.73	118.25
	Fzd1	NM_021457	553.7	51.9619	571.633	69.3965	1001.77	68.3507	1096.3	82.1125
	Sertad4	NM_198247	1374.17	75.3342	1577.57	128.747	2435.3	188.983	2591	94.5296
	Pitx2	NM_011098	1199.8	44.1772	1440.33	40.2367	2044.37	94.5998	2268.03	151.985
	Tsc22d3	NM_001077364	430.7	19.3	456.333	21.2109	781.467	60.5744	827.133	13.6463
	H2-D1	NM_010398	422.933	18.6739	436.567	18.8843	753.333	14.3189	834	90.3207
	Irgm2	NM_019440	144.167	8.58338	157.233	3.88773	260.533	13.9984	271.133	11.5343
	Nicn1	NM_025449	1279.57	97.023	1682.7	103.087	1896.4	74.015	2531.6	71.0925
	Lipa	NM_021460	542.067	31.5952	547.133	24.5754	1104.6	100.326	933.367	32.0852
	Sema3a	NM_009152	665.3	23.499	815.3	16.7502	1130.3	65.0952	1226.5	47.9151
	Ifit2	NM_008332	310.067	11.5553	319.167	9.94407	510.233	43.3939	645.967	42.2169
	Aspm	NM_009791	577.033	11.3655	1974.27	101.068	396.667	7.00579	1605.9	82.3885
	Gm129	NM_001033302	380.3	19.8873	478.833	43.0045	593.233	62.8311	733.467	55.6693
	Gtpbp2	NM_019581	1456.97	212.198	2290.23	86.3336	2121.23	50.7429	2504	81.2157
	Nusap1	NM_001042652	119.7	5.9925	242.767	9.321	125.133	6.80841	200.2	7.03017
	Timp3	NM_011595	2516.1	349.4	2726	250.106	4683.3	140.119	4527.27	286.18
	-	NM_001081015	159.333	6.3357	176.233	10.4257	267.433	20.0242	310.733	14.4049
	Mycl1	NM_008506	129.6	3.7581	149.933	4.48714	217.8	15.9544	245.7	9.61613
	Ubtd2	NM_173784	847.967	57.2414	909.833	35.7048	1566.1	91.3938	1521.6	57.6993
	Arl6ip1	NM_019419	4712.93	84.157	14885.1	588.721	4026.43	203.07	12796.3	275.038
	Arrdc4	NM_025549	290.533	14.3427	296.267	6.84503	493.833	28.6353	576.133	18.4487
	Pdzrn3	NM_018884	318.067	12.6618	374.167	18.6712	581.167	12.3159	533.033	29.8124
	2310007B03Rik	NM_172411	132.933	7.12141	163.2	9.95942	202.4	4.95681	255.467	26.2537
	-	NM_177357	119.4	7.12905	132.933	2.65351	201.367	14.7113	223.233	18.2386
	3000004C01Rik	NM_197959	274.967	5.16409	865.833	23.5944	242.933	8.20657	729.033	32.5774
	Ngfrap1	NM_009750	4852.57	222.317	5084.27	104.835	7986.47	286.27	9553.9	55.7684
	Dnajb4	NM_025926	780.733	58.1017	808.733	106.375	1344.4	116.339	1484	108.064
	H2-Q7	NM_010394	195.733	3.13174	218.067	7.34628	310.8	13.8134	381.067	18.0465
	1700025K23Rik	NM_183254	417.967	41.819	517.267	15.2123	646.633	40.2173	770.367	24.264
	-	XM_132755	145.033	6.8863	161.367	7.01815	233.3	6.07975	274.3	5.70468
	St5	NM_029811	2085.87	151.395	2075.2	71.489	6093.37	214.899	5614.67	369.065
	Ptprd	NM_001014288	304	35.0046	324.467	27.5846	547.533	11.622	525.267	19.2489
	Pitx2	NM_001042502	3201.03	133.09	3700.8	186.144	5288.63	76.9333	5687.67	411.351
	Ifit2	NM_008332	260	8.09341	262.033	4.0769	404.433	44.7697	525.4	31.8199
	Ssbp3	NM_198438	383.8	10.9	417.033	16.3162	661.833	8.04287	673.833	19.2591
	Tnnc2	NM_009394	154.733	2.03333	160.7	4.41173	261	16.9477	283.733	26.2263
	Incenp	NM_016692	669.6	21.6809	2002.37	34.0366	569.333	25.1884	1837.23	68.5596
	Hn1	NM_008258	10539.1	446.206	16090.4	529.604	12994.2	469.968	18900.7	711.372
	Tle4	NM_011600	750.467	31.9191	773.5	7.90759	1335.03	50.9857	1303.57	24.9876
	Ddx25	NM_013932	538.767	37.9901	600.633	43.4389	975.3	73.265	872.633	54.426
	Mus81	NM_027877	374.467	10.2564	538.533	16.3555	517.667	34.6291	644.6	39.5496
	Bub3	NM_009774	279.9	10.6165	506.6	26.7052	285.2	5.8046	478.433	2.47745
	Aif1l	NM_145144	7338.67	687.775	8167.7	480.054	11704.2	1283.96	13397.4	806.953
	Rassf2	NM_175445	292	23.0049	299.1	13.0117	543.167	53.3308	481.367	16.2598
	-	NM_144864	436.067	29.8811	674.867	44.5442	563.567	18.0038	737.033	14.7388
	Skap2	NM_018773	1052.7	77.1237	1065.7	3.13209	1924.23	107.711	1777.6	22.3806
	Sepx1	NM_013759	1238.13	74.6271	1367.2	104.378	2018.33	145.617	2221.33	226.374
	Scand3	NM_183088	207.9	7.38196	241.067	12.1016	319.533	14.3945	379.567	5.58341
	Cdkn2c	NM_007671	524.167	0.906152	888.5	53.054	614.7	38.955	865.1	97.6025
	-	XM_131462	293.5	47.4455	297.533	20.6445	547.433	7.49318	479.933	11.8352
	Magi1	NM_010367	386.233	21.7847	452.867	30.1681	634.467	46.8078	655.6	39.1727
	Apaf1	NM_001042558	682.133	40.9356	707.8	7	1082.67	31.1189	1283.2	60.6757
	Zfp41	NM_011759	496.867	34.2799	605.267	11.7935	734.2	25.1421	899.033	15.8424
	Tlr6	NM_011604	240.067	8.794	257.3	6.40807	374.9	17.4061	449.233	20.4803
	Nedd9	NM_017464	1316.97	96.2555	1628.1	135.622	1915.73	50.4331	2383.7	76.4912
	Ifi27l1	NM_194069	2600.63	62.3505	2495.27	129.22	7477.93	187.832	6917.2	204.495
	Irx3	NM_008393	250.633	13.7872	262.333	23.2529	470.367	16.7342	390.3	30.5315
	Ddit3	NM_007837	581	74.2644	680	61.4305	1006.3	35.2796	910.267	18.9288
	Cxcl12	NM_021704	214.367	16.9125	182.633	4.6563	672.667	78.0386	534.933	56.7532
	Tlr2	NM_011905	407.533	3.73021	440.4	5.85064	614.167	29.6667	761.167	33.2493
	Hice1	NM_029621	661.067	40.0642	761.033	3.71229	949.4	47.8932	1234.03	24.5874
	9430015G10Rik	NM_145557	298.667	49.2248	485.167	45.5196	318.6	10.7058	525.167	9.35598
	Gbp2	NM_010260	195.533	9.66805	185.067	4.77993	478.233	23.7246	597.933	32.2203
	Mex3a	NM_001029890	820.2	29.4349	979.433	59.0484	1239.87	48.5085	1427.83	62.6261
	Oasl1	NM_145209	143.067	9.01228	202.433	22.434	179.533	8.6111	252.967	8.93874
	Ccl2	NM_011333	205.233	16.8377	220.8	10.0145	263.833	17.9342	426.167	39.5011
	Btg4	NM_019493	134.3	5.91805	215.833	7.66254	145.867	4.21756	234.067	9.92981
	Nfib	NM_008687	1755.27	78.6751	1781.03	39.5856	3027.07	221.707	2970.8	123.47
	H13	NM_010376	554.4	101.528	601.433	70.8057	997.833	41.9612	853.767	32.1167
	Tnnc1	NM_009393	251.033	7.72579	237.3	9.01628	710.333	91.9203	663.267	18.8242
	Tapbpl	NM_145391	320.7	3.74032	331.967	16.8453	499.767	23.4358	581.367	13.3609
	Palld	NM_001081390	1563.03	106.711	1633.97	145.917	2705.3	169.857	2533.2	111.551
	Kctd6	NM_027782	881.467	40.9188	1013.47	96.3504	1379.3	18.4565	1470.1	9.12159
	Ddah2	NM_016765	2302.7	36.707	2324.73	95.5693	4023.23	92.1256	3714.77	202.897
	BC052040	NM_207264	785.867	28.0069	1345.6	49.8036	794.267	17.7825	1293.73	13.2712
	Jdp2	NM_030887	934.967	44.5079	1015.77	13.8031	1508.73	159.884	1556.07	62.2455
	Nupr1	NM_019738	4332.67	328.645	4441.13	286.146	6843.83	260.033	7585.17	299.722
	Ifit3	NM_010501	152.167	2.08513	163.6	4.96689	225.167	9.18955	273.767	11.4019
	Col6a2	NM_146007	211.433	17.5387	216.1	19.4171	423.767	29.3576	280.7	6.55464
	Cdk5rap2	NM_145990	437.133	12.2367	646.8	27.3007	520.9	24.3562	731.767	40.0294
	Grb14	NM_016719	205.733	12.616	216.467	7.51584	371.4	40.4671	304.767	17.7877
	Arl4c	NM_177305	586.7	39.1266	611.5	34.5115	859.467	56.816	1074.23	44.4119
	Espl1	NM_001014976	451.9	46.1881	1387.7	89.3809	362.267	22.6248	1136.1	31.5932
	Pdlim7	NM_026131	5307.7	334.872	6115.27	388.983	8099.27	403.179	8805.17	192.287
	Pop4	NM_025390	4020.97	67.0081	5378.6	16.5461	4746.7	231.475	7293.4	330.037
	Fam26e	NM_178908	137.633	5.8607	175.133	18.5769	197.467	8.0466	222.367	8.90774
	Il18	NM_008360	121.1	6.78847	121.967	1.68951	199.9	4.24421	201.333	12.5082
	Rnf40	NM_172281	862.733	52.7826	1012.8	56.8806	1318.2	45.0823	1395.83	86.8
	-	XM_284281	657.8	20.5709	707.433	25.2385	1030.47	112.851	1102.5	27.6903
	Cdc20	NM_023223	1225.97	30.8233	3677.43	134.222	938.433	25.1774	3215.23	234.564
	Srf	NM_020493	1777.4	84.8225	2303.23	58.6182	2623.23	193.53	2732.03	135.172
	Tuba1a	NM_011653	16740.4	643.803	23776.7	441.765	18708.8	807.515	29538.8	138.933
	Mapt	NM_010838	142.867	9.20984	148.5	5.42433	231	12.5096	234.667	17.4444
	Plk1	NM_011121	1652.17	22.8615	5457.53	257.156	1014	37.6036	4323.1	45.2013
	Mdk	NM_001012335	269.333	18.3628	306.067	16.8238	412.667	24.7187	434.933	10.455
	Mospd1	NM_027409	722.9	32.3049	782.767	44.2093	1158.77	36.9542	1148.17	3.86839
	Fktn	NM_139309	231.2	19.936	260.967	6.72119	348.733	29.7736	375.933	13.9277
	Repin1	NM_175099	381.733	33.2861	395.033	26.0752	586.467	16.6945	644.733	2.66604
	Tjap1	NM_028751	651.267	75.0331	674.6	59.732	1062.4	56.4802	1035.7	92.3139
	Cxcl10	NM_021274	112.667	2.29226	141.6	2.0108	149.567	2.77208	188.1	6.46452
	Aqp5	NM_009701	833.1	79.1506	1210.47	49.9128	965.267	65.5872	1365.8	28.1202
	Cmpk2	NM_020557	229.167	15.7617	231.867	23.8251	298.767	13.8882	443.067	11.2653
	Fstl1	NM_008047	1194.7	138.642	1151.67	123.024	3267.73	411.555	3044.1	162.918
	Pou3f1	NM_011141	145.067	1.02035	154.2	6.76855	225.7	19.0637	235.1	10.3942
	Tpm2	NM_009416	6492.13	503.45	6773.27	373.527	10246.4	653.465	10497.7	863.107
	Fam167a	NM_177628	471.2	33.573	478.4	55.6638	799.9	35.8935	718.6	3.28836
	H3f3a	NM_008210	285.267	10.6543	306.167	19.0356	443.533	18.6287	459.167	24.1598
	Cdc25b	NM_023117	254.7	10.1129	830.7	39.9252	171.733	9.47072	626.367	34.6838
	Per2	NM_011066	301.2	25.3225	346.933	10.5956	478.233	32.2744	450.867	11.4173
	-	XM_284281	595.167	34.5003	652.533	38.9718	905.467	81.6757	960.667	51.4989
	Nedd9	NM_017464	1349.67	48.2457	1603.9	119.177	1931.53	142.105	2172.97	66.2405
	Foxp1	NM_053202	550.867	13.2364	589.333	17.5119	850.867	43.1175	888.733	19.3502
	Zfp37	NM_009554	202.167	4.48491	246.533	12.0668	274.267	18.4234	333.833	27.381
	Lmcd1	NM_144799	209.3	17.3811	231.567	9.56684	314.133	27.4015	338.9	18.5495
	Mfap2	NM_008546	164.233	6.91408	176.7	9.71202	298.867	25.8162	218.367	16.2974
	Asb4	NM_023048	168.433	17.0339	174.7	8.56096	243.567	25.269	293.233	13.548
	Tmpo	NM_011605	1656.1	50.8269	2398.9	201.471	1890.07	19.7283	2704.47	41.1368
	-	NM_025847	862.033	40.1511	1140.1	13.2372	1172.5	24.0286	1327.33	24.0887
	Wdr68	NM_027946	3708.53	254.352	4950.73	80.527	4845.7	239.877	5857.07	107.438
	Zfp36l1	NM_007564	2121.87	9.6696	2228.37	306.677	3398.07	51.5652	3315.93	63.7915
	Gdpd1	NM_025638	723.433	22.6662	735.1	35.5158	1124.57	55.287	1188.6	60.12
	Ccdc123	NM_028120	471.533	12.3344	781.633	30.0722	479.433	23.3528	723.333	6.36195
	Foxc1	NM_008592	838.133	22.063	879.1	68.1048	1280.27	55.0034	1363.83	40.5764
	Tg	NM_009375	127.867	6.79959	134.433	7.40818	176.433	17.4937	226.4	10.641
	Thbs2	NM_011581	118.3	2.10079	120.6	4.72264	203.133	11.0731	173	6.73523
	Pmp22	NM_008885	192	21.0925	203.533	13.513	292.3	17.2722	310.2	17.9595
	Pak3	NM_008778	190.867	17.2111	194.667	11.787	308.8	22.5965	297.2	10.4006
	Sorbs1	NM_001034964	161.533	6.36771	161.6	4.24421	235	9.92891	280.3	18.5209
	Cxcl12	NM_001012477	193.633	19.8818	188.7	12.5703	557.6	16.2316	451.2	28.6657
	Trim59	NM_025863	1484.97	86.7547	2233.53	182.73	1526.87	111.897	2450.17	38.0333
	Unc5c	NM_009472	118.9	2.85715	138.233	4.62469	171.7	4.75079	187.167	6.36405
	Cdc20	NM_023223	1228.63	17.6131	3459.53	111.483	969.3	54.8794	3232.6	228.589
	Cdc20	NM_023223	3003.27	91.4604	8360.77	110.849	2489.97	59.5013	7807.17	88.2085
	Hist1h1c	NM_015786	6527.6	446.344	8520.77	700.058	8371.87	411.726	10372.2	206.44
	Slc9a8	NM_178371	566.467	31.1216	862.2	46.4216	700.167	36.0948	799.5	37.4185
	-	XM_133019	5607.93	258.855	6750.97	268.446	7997	155.38	8626.6	507.36
	Ndc80	NM_023294	1023	34.9293	2627.37	116.607	912.133	27.697	2777.23	97.4333
	-	NM_177581	1411.5	134.769	2265.3	140.641	1502.63	52.6347	2100	82.3005
	Usp2	NM_198091	204.167	10.9721	234.767	14.9052	292.7	16.2382	321.133	7.03949
	Tmub1	NM_022418	340.9	16.9662	380.033	10.134	520.367	46.7056	516.367	20.4475
	Zfpm2	NM_011766	782.033	39.4401	978.4	65.0165	990.033	52.7926	1278.97	21.841
	Lix1	NM_025681	129.633	9.855	137.667	5.77504	196.633	9.43263	203.433	15.2097
	Pde6d	NM_008801	471.833	22.9925	706.6	15.4966	550.667	34.3255	699.9	31.3745
	Serf1	NM_011353	1815.13	276.903	1917.53	17.2202	2886.7	135.48	2718.63	65.2938
	Ddt	NM_010027	1195.17	133.434	1253.5	45.9797	1935.8	80.6577	1764	32.2795
	E2f5	NM_007892	880.933	46.0421	1369.47	58.9463	982.933	28.8981	1296.23	44.6785
	Cdc42ep2	NM_026772	630.1	72.4644	712.433	46.5364	912.8	18.791	983.067	46.857
	Pdgfa	NM_008808	5444.9	33.6097	5733.2	63.0672	8006.03	181.942	8792.73	384.025
	Lgals9	NM_010708	931.133	57.767	999.967	45.4803	1489.1	109.501	1362.9	62.3454
	Zfp46	NM_009557	869.133	15.6321	916.067	74.7513	1298.67	65.8644	1377.47	96.7971
	Tmem77	NM_026013	566.333	13.3097	691	25.4006	745.067	27.153	901.833	35.4068
	St7l	NM_153091	671.5	27.3922	850.833	90.1005	858.967	14.2522	1061.13	17.3265
	Hn1	NM_008258	4556	260.572	6586.3	212.792	5002.43	325.769	7186.3	242.716
	LOC547349	NM_001081032	256.4	21.8464	263.333	23.8403	393.067	11.3895	399	18.6656
	Gmds	NM_146041	842.333	24.0949	1018.23	32.626	1235.3	80.7244	1212.77	32.6209
	-	XM_131683	142.5	8.25288	165.4	10.4676	195.867	16.0574	225.1	6.30238
	Ogn	NM_008760	113.533	2.56926	105.533	7.20702	348.333	71.2794	240.967	19.5204
	Zfp101	NM_009542	260.7	14.3431	361.133	2.80614	270.533	20.1615	440.567	12.0401
	D030056L22Rik	NM_177640	2862.77	143.635	4154.8	289.063	3110.97	82.9562	4507.8	123.711
	Fam164a	NM_173181	657.233	37.5369	685.233	25.638	1010.77	59.4392	1006.2	35.252
	Uchl1	NM_011670	570.567	19.6944	608.767	26.1302	836.133	52.1368	899.867	53.8361
	Tmpo	NM_001080129	1549.93	27.8702	2010.67	204.889	1827.2	74.8092	2528.5	56.9572
	Hspb6	NM_001012401	3977.07	203.767	4331.87	130.829	5795.13	196.848	6207.33	123.842
	-	XM_127861	442.8	28.318	622.067	51.383	479.6	41.7612	716.733	33.4075
	St7l	NM_153091	740.467	6.16694	918.467	51.5136	950.5	61.3	1163.93	22.325
	Hist2h3b	NM_019469	7746	269.773	10707.9	644.726	9559.03	337.583	11448.1	485.214
	Tubg2	NM_134028	264.533	6.22798	276.033	16.4025	431.233	6.30776	374.833	9.08503
	Supt4h1	NM_009296	1164.1	38.314	1360.03	83.9924	1634.33	51.3115	1767.27	138.148
	H2-Q8	NM_023124	177.967	5.7074	178.267	3.08617	239.833	13.7047	309.8	21.6083
	Igf2	NM_010514	16902	928.013	18723.7	1345.8	24790.9	1893.25	25614	1022.24
	Med1	NM_134027	1106	29.7418	1316.3	34.2115	1501.67	50.5469	1700.9	60.4189
	Dph2	NM_026344	1000.53	32.5389	1259.17	30.9106	1194.3	79.6589	1627.27	124.134
	Pias4	NM_021501	554.933	33.9291	586.833	7.35988	835.933	24.9321	838.9	40.42
	Tmem218	NM_025464	558.667	48.6053	833.033	41.653	633.133	14.1353	810.4	18.4893
	Cdc25c	NM_009860	392.267	15.5959	1094.8	36.2983	334.567	16.5874	963.067	45.8649
	Hbp1	NM_153198	2413.4	183.59	2416.27	119.466	3574.4	69.8206	3838.63	144.719
	Fam107a	NM_183187	120.833	6.41777	121.533	6.49624	183.367	10.6198	187	11.212
	Josd2	NM_025368	610.433	11.8266	677.967	32.362	923.133	39.2323	883.9	44.9095
	Prrg2	NM_022999	353.767	12.9849	365.167	32.4312	540.667	33.482	533.733	23.4277
	Ddit3	NM_007837	548.867	69.1631	575.233	40.5648	827.267	45.2915	830	30.1458
	Zfp41	NM_001044718	474.633	36.7009	519.567	27.2364	646.767	23.3622	760.567	30.0172
	Gsdmd	NM_026960	433.6	19.0143	445.2	8.48901	627.067	15.4924	687.867	20.0217
	Pex19	NM_023041	846.033	78.9226	855.867	38.9718	1254.73	21.2008	1321.8	31.5529
	Basp1	NM_027395	191.933	4.90249	206.467	14.4516	260.2	12.0952	311.867	23.8751
	Aqp5	NM_009701	2423.2	157.952	3038.53	274.912	2855.73	80.6375	3930.87	164.191
	1810030N24Rik	NM_025471	822.9	88.6371	933.1	41.0069	1151.5	22.8541	1246.43	35.1682
	Tmsb10	NM_025284	11195.7	570.139	11916.1	186.78	16845.2	425.693	16535.1	310.972
	Ccdc61	NM_001033314	240.1	2.96873	343.167	15.3912	252.9	7.86193	375.2	4.19325
	Mid1	NM_183151	272.267	3.93376	307.167	15.136	372.667	28.4381	421.367	11.0961
	Ssbp2	NM_024186	535.433	25.4077	651.5	34.1749	708.133	8.51202	800.033	20.9336
	Creb3	NM_013497	730.067	42.6746	750.867	37.6533	1146.63	40.7883	1046.63	48.1135
	-	NM_025847	1043.8	42.0632	1261.57	64.5197	1253.97	56.5097	1686.23	77.2229
	Ccdc80	NM_026439	1107.73	139.698	977.5	111.194	2801.77	210.487	2909.37	167.501
	Exog	NM_172456	413.867	13.2268	547.333	27.4246	478.333	7.94362	639	27.1216
	Sobp	NM_175407	273.733	5.01941	294	17.4738	417.933	24.3745	388.733	6.60362
	Gpc3	NM_016697	118.567	3.71947	121.7	7.76938	173.1	11.0436	181.8	11.6228
	Ahcyl1	NM_145542	3909.67	137.679	4154.6	59.2095	5668.27	323.478	5880	192.331
	Tmem77	NM_026013	432.867	35.535	558.1	27.105	554.567	6.50367	622.3	15.4442
	-	XM_355444	507.3	2.21886	551.167	27.2848	688	36.1333	793.9	23.0938
	Gtpbp8	NM_025332	514.033	29.1727	565.433	6.86764	688.1	25.6757	805.033	39.0504
	Zwilch	NM_026507	197.7	1.861	270.633	8.02586	205.5	4.40492	315.167	7.99715
	Adarb1	NM_130895	224.8	11.3808	232.333	14.3986	341.367	10.7984	324.967	15.7279
	C130022K22Rik	NM_172730	864.467	10.7617	1074.2	25.06	1120.67	6.5244	1260.07	61.648
	Gstt3	NM_133994	789.1	46.3924	818.7	57.016	1126.3	80.5858	1206.5	59.7055
	Mrpl16	NM_025606	853.7	93.5738	919.133	91.8403	1146.43	40.1284	1342.9	27.8283
	Taf13	NM_025444	1952.57	149.907	2333.17	94.9385	2734.1	33.8013	2726.23	104.284
	Narg1	NM_053089	3902.07	207.395	4447.93	269.563	5243.87	174.348	5879.23	211.153
	Adprh	NM_007414	3795.93	65.8729	4855.1	156.11	4850.13	43.9305	5440.17	226.985
	Stxbp4	NM_011505	330.433	17.3222	480.433	11.8504	388.767	14.5465	448.7	26.7358
	Zwilch	NM_026507	181.633	8.30288	255.4	8.55005	194.333	10.9972	274.5	13.8921
	Irf9	NM_008394	544.267	15.8713	566.033	13.6902	807.5	22.7511	794.2	9.65004
	Hfe	NM_010424	215.567	10.6921	244.133	14.6677	309.7	12.2055	304.5	4.07226
	-	XM_133021	218.8	12.6176	260.233	3.4275	279.033	11.2464	330.7	19.4672
	Ino80b	NM_023547	337.9	13.574	494.667	21.4565	375.6	9.90825	472.533	11.4027
	Dsn1	NM_025853	532.133	35.9315	684.933	44.7514	556.1	31.8002	867.8	11.6174
	Cdca8	NM_026560	581.167	7.40818	1509.8	102.58	510.567	20.4328	1454.63	25.327
	Zfp36l1	NM_007564	4160.03	320.057	4248.77	248.593	6279.87	316.29	5943.53	23.1642
	Stat1	NM_009283	222.7	9.57566	247.7	5.04678	283.533	11.8257	350.5	14.2453
	Lyplal1	NM_146106	627.167	13.1191	740.567	14.4827	860.267	18.3538	882.1	8.64079
	Gja1	NM_010288	9048.53	427.011	9514.13	637.621	13354.2	610.149	12938.5	353.921
	Trappc3	NM_013718	358.2	19.5594	382.467	25.0657	497.633	39.7583	534.667	16.0931
	Spag5	NM_017407	127.6	4.21228	197.8	4.34051	133.2	4.95681	172.433	2.42304
	Stx5a	NM_019829	3806.03	153.218	4105.67	45.8824	5642.13	455.116	5253.37	149.034
	Sfxn4	NM_053198	254.767	13.4454	311.033	15.572	326.667	21.1176	366.4	5.96015
	Cdc25c	NM_009860	328.033	40.3344	934.7	53.1045	247.233	12.3468	792.667	15.3667
	Pknox2	NM_001029838	438.233	16.3555	517.033	10.758	524.833	23.6774	683.733	32.213
	Axin2	NM_015732	199.8	17.2934	210.233	17.0806	276.1	4.20357	299.967	20.023
	Scoc	NM_019708	2388.13	80.7774	2544.83	34.6184	3370.43	188.948	3482.43	55.7308
	Sfxn4	NM_053198	456.867	22.1743	523.167	31.8641	585.733	36.9971	688.5	8.05419
	Lmod1	NM_053106	134.2	1.92873	143.3	6.7951	193.133	6.63936	191.267	5.21739
	Cdkn1a	NM_007669	290.533	8.51906	293.4	18.9616	397.867	18.0845	450.867	24.0854
	Prnp	NM_011170	6135.77	286.371	6277.23	401.342	9155.8	635.684	8687.6	321.774
	Artn	NM_009711	116.7	3.14325	127.233	2.08273	147.8	9.847	183.7	6.23645
	Nol11	NM_133702	805.4	13.4374	854.5	45.176	1006.4	31.6387	1303.13	19.5777
	Dlgap5	NM_144553	644.967	27.2505	1615.1	38.6231	550	11.1132	1674.33	25.692
	Itfg2	NM_133927	608.267	19.2563	788.767	26.2007	700.767	39.4539	897.133	57.3666
	Snx11	NM_028965	1004	53.1711	1291.43	60.3258	1199.47	59.3271	1448.13	45.2035
	Ccnf	NM_007634	178.567	9.10391	537.333	14.0822	154.333	3.66621	368.933	6.44317
	-	XM_134455	2588.1	97.3146	2721.23	124.075	3459.8	48.4711	3956.2	221.823
	Ate1	NM_013799	1382.7	35.2407	1855.03	104.275	1586.53	73.5766	1973.57	40.068
	Cdkal1	NM_144536	749.333	60.7054	1050.13	41.5807	770.9	11.8655	1113.2	19.1286
	-	XM_484040	182.433	5.34052	183.467	2.47409	271.967	10.0989	258.267	24.535
	Adamts5	NM_011782	705.467	97.1296	543.267	91.9267	1894.6	228.92	1778.6	29.2966
	Cstf3	NM_145529	2078.93	51.4033	2830.4	189.914	2403.53	44.6798	2887.7	99.1108
	Taf9b	NM_001001176	170.333	12.0207	181	4.0501	234.867	2.57056	249.433	5.18406
	Nfkbie	NM_008690	301	3.10859	455.1	29.265	319.033	21.1599	401.433	19.148
	Mospd1	NM_027409	336.667	2.26004	370.567	19.2884	465.267	23.5653	478.7	22.0107
	Smtn	NM_013870	128.333	4.10623	171.833	6.363	140.1	5.40494	188.967	9.40006
	Abat	NM_172961	310.033	20.872	327.467	18.7135	475.933	33.9026	406.4	14.1302
	Fxc1	NM_019502	646.633	22.5829	764.3	33.9618	848	2.91433	910.9	50.065
	Ilk	NM_010562	744.933	62.2021	882.333	21.6353	971.5	32.1727	1052.67	28.3221
	St6gal1	NM_145933	1530	32.3716	1792.97	17.8766	1966.73	101.895	2206	65.4385
	Ccdc92	NM_144819	360.267	7.61672	546.133	16.8563	371.633	20.3949	486.867	9.94893
	Ccdc66	NM_177111	240.033	16.2214	317.667	7.33424	274.5	16.1581	343.6	4.39659
	-	NM_026889	1890.47	39.9815	2532.23	92.1018	2054.2	24.8687	2777.17	19.3196
	Zscan21	NM_001044705	394.4	2.50267	451.233	11.3702	539.8	19.7617	544.667	18.2
	Pde6d	NM_008801	577.833	24.2862	777.3	20.854	623.667	42.127	848.9	48.4042
	Prpf38a	NM_172697	356.267	39.4043	417.233	7.65034	429.5	22.3505	539.767	19.3684
	Nhsl1	NM_173390	226.033	8.1405	241.8	8.75233	323.4	10.0167	314.433	14.7935
	Prss27	NM_175440	125.267	7.52869	149.167	5.72839	149.167	11.3895	189.133	6.0938
	Gtdc1	NM_172662	378.767	13.5732	515.967	31.0843	408	18.6977	547.133	22.0344
	Disp1	NM_026866	777.933	82.7941	779.167	38.1403	1124.73	25.2261	1117.1	30.1818
	Opa3	NM_207525	612.1	28.4388	805.1	18.0511	685.533	43.8796	884.533	44.5975
	5133400G04Rik	NM_029485	352.133	18.2332	450.133	19.7937	385.3	18.5834	528.133	26.8164
	Bet1l	NM_018742	503.233	10.5964	520.333	31.3938	736.933	10.2668	691.367	30.9026
	Ssbp2	NM_024186	570.833	27.9046	641	57.5606	707.7	4.12189	861.3	20.471
	Zyx	NM_011777	18944.8	1046.97	21463	424.356	26955.7	1446.89	24888.5	1064.61
	Mmab	NM_029956	215.867	1.02686	268.9	8.45064	269.2	1.42244	296.367	14.7216
	Mrps31	NM_020560	1363.57	47.8319	1721.4	29.6155	1609.53	73.0275	1939.63	45.3358
	Sepx1	NM_013759	275.9	16.691	280.4	21.1486	377.167	11.9605	407.8	5.95735
	Lmnb1	NM_010721	3400.5	224.85	4575.53	150.903	3672.8	159.503	4880.93	155.145
	Aph1b	NM_177583	419.8	20.9001	420.933	8.32052	615.267	19.936	583.633	25.2456
	Ulk1	NM_009469	276.5	11.2429	287.867	20.258	394.1	11.2926	384.367	25.1853
	Ttk	NM_009445	290.733	34.0501	729	60.8408	272.067	13.3513	702.7	74.8252
	Ephx1	NM_010145	235.533	5.93024	259.833	4.17226	297	10.4711	351.1	7.10657
	Selk	NM_019979	1941.1	177.596	2152.67	115.432	2770.07	80.3113	2555.2	74.9182
	Emd	NM_007927	902.967	10.7637	968.6	51.4005	1130.47	37.5067	1377.87	87.7365
	Prpf38a	NM_172697	2701	53.0348	3442.13	82.8903	3166.4	33.93	3789.7	264.268
	-	NM_175536	221.533	3.4275	300.033	6.94774	263.433	14.0741	289.1	12.1698
	Pdzd11	NM_028303	681.9	65.6324	825.633	8.89369	822.667	23.6774	975.567	18.9288
	Pde4d	NM_011056	288.367	16.2704	353.533	12.436	355.767	14.9693	399.067	12.3478
	Tmsb10	NM_025284	22613.1	1480.24	24493.2	752.597	32388.9	213.146	30019.3	1202.4
	Hist2h3b	NM_178215	10349.2	424.624	12910	1015.84	11568.7	274.138	15277.6	598.572
	Zhx1	NM_009572	145.6	3.48282	153.4	8.39305	216.167	1.76383	189.6	2.38607
	Ddah1	NM_026993	3359.3	218.241	3613.27	93.8559	4537.2	260.721	4748.07	128.13
	H1fx	NM_198622	311.333	22.3835	435.433	16.9604	334.333	4.28576	424.933	12.9433
	Cebpb	NM_009883	7076.2	295.431	8914.9	650.947	7937.23	243.329	10261.6	226.759
	1700022C21Rik	NM_029602	288.333	23.7623	375.9	11.5487	318.067	12.6254	410.567	19.8065
	Pef1	NM_026441	784.267	37.302	851.6	35.0563	1058.4	57.0772	1093	54.5227
	Cdc42ep4	NM_020006	522.067	1.93247	666.833	44.9412	597.667	13.4752	732.933	15.2602
	Atp6v0b	NM_033617	1834.07	90.2632	1847.57	44.8284	2686.47	82.332	2481.83	102.691
	Tnfrsf19	NM_013869	113.267	3.56713	117.433	2.21836	157.333	8.13354	158.167	6.1553
	Rai12	NM_018740	1886.83	20.6141	2105.4	83.1766	2333.67	119.995	2765.83	101.966
	Nog	NM_008711	119.7	8.5738	133.067	9.21816	147.067	6.64939	176.933	5.10044
	Fam128b	NM_029354	877.767	56.1212	1003.2	11.6503	1188.43	25.3064	1159	2.57099
	Dph2	NM_026344	720.667	5.9962	870	39.414	819.833	39.1436	1060.03	56.9027
	Stard5	NM_023377	364.167	26.6359	374.133	22.4823	508.5	7.23809	506.6	13.5508
	Lsm6	NM_030145	1302.33	56.8265	1460.87	29.0287	1613	24.8918	1892.6	50.5435
	Ccdc130	NM_026350	853.9	20.4123	1066.57	41.0789	1010.73	46.7935	1176.4	44.9163
	Tmem218	NM_025464	234.2	11.0749	326.133	6.89573	246.2	5.20032	319.4	19.3717
	1110028C15Rik	NM_177645	499.467	10.6568	584.967	20.5998	631.933	22.3212	684.333	30.849
	Stx5a	NM_019829	432.767	13.4405	473.733	30.0412	587.367	18.1613	585.267	12.5827
	AI314976	NM_207219	695	13.5923	819.533	22.5457	797.3	42.1731	1026.23	42.7458
	Tbl2	NM_013763	540.567	44.8167	709.633	45.0753	562.533	12.6196	783.133	16.2465
	Rai12	NM_018740	1925.57	85.3467	2278.87	77.2706	2298.4	53.8034	2741.67	145.302
	Ulk1	NM_009469	441.2	20.8349	452.6	25.3737	621.4	29.263	602.533	42.5482
	BC057552	NM_172502	1015.3	23.5611	1373.17	26.7026	1129.6	91.0583	1353.87	48.9234
	Tmem136	NM_001034863	228.3	17.1555	237.433	21.5902	303.5	9.00907	326.1	10.4886
	Ube2t	NM_026024	244.767	10.7172	572.033	77.0764	241.6	7.35278	604.9	52.0205
	Zscan21	NM_011757	249.833	8.94992	283.633	6.08011	325.467	5.65401	338.867	22.9501
	Il3ra	NM_008369	166	3.66652	175.8	4.24382	231.433	7.45259	221.633	9.74206
	Ddit4l	NM_030143	136.333	5.91533	141.4	5.51755	205.6	2.11975	169	6.67757
	Hemk1	NM_133984	394.867	20.6359	582.4	24.2315	426.667	20.8168	484.933	25.5427
	Nras	NM_010937	6608.03	337.249	7433.07	334.012	8493	260.837	9070.17	86.6805
	Myl4	NM_010858	196.567	14.7375	192.033	4.26002	541	69.9917	403.467	55.8607
	Nrap	NM_198059	158.567	2.627	163.5	2.73922	222.333	12.5889	213.667	7.56799
	Puf60	NM_028364	7789.2	300.747	8829.17	383.85	10082.3	326.774	10523.2	455.224
	Tmem63a	NM_144794	718.667	31.2641	726.8	10.9464	1054.3	55.1511	932.267	26.6757
	Map2k5	NM_011840	429.4	26.806	586.2	20.4395	461.767	24.5008	572.5	18.0001
	Nphp4	NM_153424	189.5	2.02978	232.867	2.97564	234.233	9.58981	248	4.64866
	Slc9a8	NM_148929	464.867	12.8016	673.533	6.8387	478.867	28.5786	601.8	29.0689
	-	XM_125861	324.9	9.8764	893.567	54.398	248.333	10.5411	757.367	26.9901
	Zfp639	NM_144519	2791.8	74.102	3394.8	141.353	3160.47	111.861	3975.53	215.871
	Pde6d	NM_008801	866.133	31.5164	1124.73	61.7614	907	58.5277	1234.17	43.4131
	Ap3m2	NM_029505	194.267	11.6871	213.833	10.116	262.033	8.52786	256.633	10.8573
	Repin1	NM_175099	142.033	5.43149	155.033	6.10091	178.167	4.48008	201.5	7.59408
	6430706D22Rik	NM_172505	230.8	6.66658	327.267	0.24037	238.733	24.3803	302.6	8.47368
	Tbrg1	NM_025289	2213.77	107.731	2278.77	64.5971	2923.17	159.201	3120.57	42.2793
	Sec16b	NM_033354	339.167	6.69859	391.6	2.34592	451.133	2.64344	432.2	14.7453
	Sgol1	NM_028232	799.567	11.1118	2115.23	98.9462	599.567	14.7988	1953.47	24.5228
	Lyz1	NM_013590	123.9	1.64418	130.533	2.78648	161.833	5.95996	172.567	2.94241
	Mfap5	NM_015776	104.6	3.93107	114.4	3.96274	137.533	8.49163	140.167	3.5788
	BC031781	NM_145943	2631.5	88.0081	3063.37	75.7635	3250.13	96.7226	3540	63.7036
	1200002N14Rik	NM_027878	160.433	4.32294	178.967	3.40653	213.133	6.58846	208.567	12.3018
	Nfatc2ip	NM_010900	252.3	0.896289	317.433	14.5783	257.467	7.03949	369.233	8.13927
	Ipo13	NM_146152	1097.5	85.3789	1106.3	39.6346	1501	51.8943	1498.97	98.0703
	Gdnf	NM_010275	289.5	44.6511	288.133	45.7992	639.9	98.2797	734.067	44.9151
	Tbc1d23	NM_026254	758.233	33.7168	799.033	5.21291	964.6	54.1712	1072.37	12.7061
	Fam40a	NM_153563	4714.97	73.0161	5156.8	217.388	6122.97	300.368	6349.93	182.291
	Alg5	NM_025442	1202.9	10.9028	1404.67	38.5228	1457.7	39.3065	1635.17	66.5327
	Arfgap1	NM_145760	1027.23	41.8916	1032.9	51.4006	1503.3	38.3367	1304.5	29.168
	Cd40	NM_170702	124.467	2.49355	128.567	0.272845	163.633	12.2739	172.8	8.60484
	Tnfrsf11b	NM_008764	107.9	3.60185	116.167	4.05887	141.167	8.19946	145.767	6.68439
	Sobp	NM_175407	276.1	6.59621	276.533	11.0135	415.7	11.5326	339.1	11.5052
	Capsl	NM_029341	91.9	4.62277	109.333	3.57833	113.6	4.75009	120.233	1.1392
	Fzr1	NM_019757	354.5	9.90673	860.733	37.3927	346.6	34.0472	824.533	41.4641
	Cnpy4	NM_178612	392.933	9.47142	430.5	1.75784	498.467	13.7921	535.433	16.8316
	1810031K17Rik	NM_026977	151.4	6.37913	160.667	5.06041	197.5	11.9215	205.767	5.33833
	Msrb3	NM_177092	151.133	5.99008	157.7	5.42248	188.467	5.81445	216.6	10.6908
	Rai12	NM_018740	4785.63	160.118	5581.43	205.151	5638.4	232.318	6593.1	170.528
	Dlgap4	NM_001042487	746.1	21.634	783.033	10.2216	1020.87	68.4814	971.3	42.6155
	Terf2	NM_009353	465.1	10.9134	634.233	34.5993	479	17.8539	615.833	28.749
	Nicn1	NM_025449	184.1	9.30287	212.667	9.38515	200.233	7.78403	271.067	4.65916
	Mme	NM_008604	128.3	2.39653	130.4	6.65157	180.933	1.80216	164.967	4.7876
	Fzd7	NM_008057	904.567	14.9766	974.067	8.59386	1068	74.3594	1314.03	57.5407
	Gzf1	NM_028986	1183.5	51.077	1610.17	54.0366	1332.4	25.1574	1445	30.8005
	Cog6	NM_026225	1338.43	38.3655	1438.67	54.6692	1617.97	96.5398	1901.97	12.0491
	Pdlim2	NM_145978	593.6	13.5244	696.967	11.9942	765.2	32.491	736.233	19.1714
	Slc4a1ap	NM_009206	946.2	14.9241	1183.7	53.559	1037.87	39.5951	1282.1	23.5918
	Gprc5c	NM_147217	127.1	2.18251	135.633	2.92366	181	2.65393	153.9	8.64349
	-	XM_127436	1891.9	77.2457	2384.37	60.2933	2089.27	15.2934	2529.37	119.137
	-	NM_146114	152	5.56507	211	5.75529	157.467	3.12908	193.367	6.92684
	Tmem209	NM_178625	1907.87	31.573	2523.07	81.7555	1992.9	51.8074	2532.07	96.651
	Smpd3	NM_021491	132.567	0.952774	137.433	9.30525	168.4	8.4949	183.733	9.50164
	BC003266	NM_030252	712.1	30.7591	794.1	26.1286	859.7	16.6857	975.533	43.6799
	Zfp36l1	NM_007564	179.367	5.49252	197.533	2.07391	224.267	2.78109	240.067	7.59481
	Zfyve1	NM_183154	255.467	3.83898	295.733	7.6038	329.267	4.96667	317.433	5.48948
	Rbak	NM_021326	367.8	17.7376	371.4	3.95769	504.067	4.75617	481.367	23.3085
	Ndufa7	NM_023202	8802.93	214.239	9550.03	548.259	11450.8	413.892	11448.8	128.066
	Zfp68	NM_013844	1373.93	56.6845	1420.97	82.2764	1729.57	99.5174	1914.03	88.1922
	Slc7a7	NM_011405	143.333	8.45406	168.833	2.09311	169.433	1.01708	189.7	2.99388
	Rxrb	NM_011306	1071.3	41.5695	1116.2	30.0495	1404.87	54.1755	1423.53	45.9408
	Dstn	NM_019771	15651.6	905.329	16164.8	875.592	20449.6	1082.08	21008.9	255.139
	Zc3hc1	NM_172735	3088.6	81.4901	3158.63	43.0378	3932	45.019	4275.7	134.659
	Ctsa	NM_008906	179.967	2.49087	185.8	3.78726	233.967	5.82819	241.933	5.584
	2810408A11Rik	NM_027419	183.933	8.29565	196.933	1.96158	221.033	6.57073	258.267	13.3029
	Trappc3	NM_013718	470.5	31.7297	471.833	19.6194	624.3	39.243	633.567	11.521
	Ssr2	NM_025448	9263.93	487.28	10007	413.143	11872.3	418.363	12168.8	218.682
	Rnf34	NM_030564	1352.73	48.9686	1514.83	46.0023	1626.13	37.119	1830.23	32.7988
	Grb14	NM_016719	127.733	4.4431	133.467	3.84419	171.867	0.560753	163.7	5.31131
	Fbn1	NM_007993	339.467	20.8415	356.3	19.8273	468.8	7.08872	420.933	2.57509
	Rfc4	NM_145480	2386.27	139.068	3019	127.304	2392.17	34.5213	3345.57	107.54
	Tmem130	NM_177735	117.233	3.85847	126.2	4.35928	145	3.36006	158.967	6.73036
	Cdk5rap1	NM_025876	632.233	17.2157	753.333	9.69284	712.2	9.90471	854.133	35.6487
	Irf1	NM_008390	512.467	29.6047	506.1	10.8896	1117.63	57.1844	1281.1	25.5316
	Paf1	NM_019458	401.833	11.6296	465.2	11.2824	493.533	7.48829	513.733	20.2667
	Mrpl24	NM_026591	3224.4	45.7145	3616.47	123.527	3909.8	61.5164	4279.8	199.664
	Eno3	NM_007933	1593.87	26.5346	1412.33	41.025	3759.33	200.752	3873.57	112.708
	Cep120	NM_178686	1175.47	104.847	1509.1	31.3838	1179.43	23.4717	1611.23	86.3226
	Rgma	NM_177740	381.7	10.0351	407.267	22.5386	535.233	23.2652	453.233	11.3079
	Mrps31	NM_020560	666.467	41.4319	753.2	41.9334	755.167	7.43445	927.467	34.0093
	Nub1	NM_016736	1083.6	40.992	1086.9	47.4515	1483.33	68.9657	1389.23	12.5738
	Tubb5	NM_011655	26620	389.836	35803.9	1903.34	26622.8	739.986	34785.4	1238.99
	Mapt	NM_010838	160.033	0.48074	173.133	4.60447	215.833	4.93874	194.967	6.64488
	Trappc2	NM_025432	390.967	7.42099	422.933	9.537	475.967	16.7551	526.667	25.5255
	Exosc1	NM_025644	4147.3	88.7993	4815.3	133.511	4762.53	209.943	5536.97	98.1573
	Mdk	NM_001012336	16988.6	368.156	17537	492.329	22693.3	319.23	21674.5	1083.5
	5133400G04Rik	NM_027733	503.2	40.6945	578.467	35.299	523.3	17.016	731.6	14.9373
	Mmadhc	NM_133839	1506.1	90.7641	1613.37	11.963	1786.1	88.4006	2087.77	76.8739
	Gmppa	NM_133708	1015.93	18.1909	1030.63	62.9316	1369.07	64.2495	1300.5	34.2956
	Lamc3	NM_011836	117.2	2.07445	119.667	3.92018	152.7	11.65	154.367	3.6094
	Bgn	NM_007542	5219.67	113.767	5305.83	198.293	7176.93	46.7821	6508.63	422.365
	Tax1bp3	NM_029564	7517.33	387.635	7618.63	301.588	10175.4	174.216	9543.13	296.884
	Commd9	NM_029635	375.033	13.1725	379.033	20.3393	501.967	20.1399	482.767	10.3499
	5133400G04Rik	NM_029485	399.467	20.698	477.633	15.3646	429.567	19.2167	543.1	3.98372
	Med27	NM_026896	1125.47	33.5848	1426.7	23.5108	1283.4	43.9468	1373.1	15.8981
	Sdc2	NM_008304	1414.33	83.9034	1153.53	66.4093	3727.8	307.308	3131.6	137.831
	Arl2	NM_019722	816.667	36.1126	907.333	8.76743	935.733	28.8003	1114.97	5.35859
	Amigo3	NM_177275	199.5	13.9271	200.9	8.74014	284.633	8.56978	237	8.60949
	-	NM_010156	649.367	26.0354	577.9	20.7693	1570.63	99.3082	1509.5	72.0538
	Zmat5	NM_026015	518.867	10.6452	613.533	5.0525	644.167	29.9059	619.4	14.4915
	Appl2	NM_145220	291.233	16.9337	296.3	14.7956	371.133	15.0564	385.4	15.2546
	Usp54	NM_030180	584.9	24.9129	764.467	2.56732	601.733	14.5511	747.8	35.3215
	Tube1	NM_028006	175.3	10.7686	218.867	1.92209	177.2	8.51959	237.233	4.14662
	Snx15	NM_026912	1031.7	13.9151	1101	49.5719	1181.73	55.4778	1443.6	46.3109
	Spag5	NM_017407	1614.03	62.876	4230	108.689	1310.8	19.9271	3584.63	50.5226
	Kdm4b	NM_172132	1190.4	31.1622	1252.3	54.7984	1655.8	87.4406	1389.3	60.5612
	-	XM_283205	271.4	7.36365	332.7	5.51936	273.667	6.87273	372.867	11.7121
	Arnt	NM_009709	285.067	13.4829	320.3	2.72091	338	8.57671	368.733	14.2813
	Loxl2	NM_033325	379.667	42.5876	367.733	30.8911	897.233	94.1564	862.533	83.0513
	Morf4l2	NM_019768	10853	199.152	11300.7	265.9	14053.9	619.047	13653.7	757.372
	Mbd1	NM_013594	1115.67	43.5563	1135.7	31.915	1381.63	21.4058	1490.63	51.5687
	Sec61b	NM_024171	1076.9	48.2725	1136.97	25.0536	1452.67	63.1111	1278.9	19.9188
	Ifit3	NM_010501	109.567	3.13387	115.033	4.49901	134.3	4.27239	144.167	2.76305
	-	XM_132514	1877.6	85.8979	2036.67	20.3393	2327.03	63.806	2378.93	34.2217
	B2m	NM_009735	16051.6	887.987	16106	952.476	20390.3	964.59	21117.4	356.726
	Cd59a	NM_007652	2092.27	28.5243	1578.53	24.6852	5251.33	106.095	5028.83	291.699
	Arhgef2	NM_008487	729.6	42.6913	869.967	14.3225	781.033	21.4548	966.033	19.0737
	Txnl4b	NM_175646	496.3	18.4939	556.8	18.0359	573.1	28.9995	649.167	13.2484
	Zc3hc1	NM_172735	4754.13	83.4667	5067.07	219.331	5729.23	158.293	6235.73	149.332
	Bcl3	NM_033601	210.833	5.51855	225.033	5.97671	263.7	2.44199	266.5	11.6629
	Ndfip2	NM_029561	791.6	21.7555	801.2	52.1784	1010.07	37.6978	1024.07	8.96313
	Dlgap4	NM_146128	443.567	17.808	483.067	15.766	566.833	4.88342	538.133	16.287
	Slc5a5	NM_053248	108.233	1.45182	118.833	3.59738	140.833	6.55371	127.767	1.63333
	Supt4h1	NM_011509	5263.77	217.902	5411.1	111.462	6478.47	155.078	6951.23	127.091
	Vps33a	NM_029929	1281.4	42.9617	1291.47	62.0119	1635.47	52.4842	1659.4	52.1374
	Bre	NM_181280	525.533	13.9663	668.333	4.99544	549.667	14.6693	661.733	8.43511
	Ppic	NM_008908	12320.2	201.767	12993.6	444.028	15735	901.607	15329.7	330.598
	Suv420h1	NM_144871	356.6	1.50111	362.033	16.729	456.933	26.2575	456.133	18.3086
	Gle1	NM_028923	731.6	34.1664	955.9	50.0941	737.6	36.2881	920.7	12.9317
	Psmg3	NM_025604	691.633	16.0504	761.467	23.5985	770.267	36.2591	937.4	11.9716
	1700112C13Rik	NM_183103	100.4	4.22256	105.533	0.145297	126.767	4.43672	125.733	3.73735
	Magmas	NM_025571	1076.63	21.4263	1158.27	48.4957	1275.77	23.8278	1404.47	58.2313
	Tax1bp3	NM_029564	6305.23	458.442	6439.4	118.341	8021.97	134.053	8007.93	317.763
	Tpm1	NM_024427	32811.7	1016.93	35486.9	1053.47	39883.1	1156.79	41493.4	1025.37
	Znhit3	NM_001005223	830.6	27.3571	1007.87	50.6223	872.133	30.6444	1077.2	15.9713
	A2bp1	NM_021477	113.467	4.06708	116.5	2.69072	147.133	2.61683	140.233	4.66702
	Hlx	NM_008250	243.3	4.531	317.7	15.8872	246.267	6.27809	301.533	15.6504
	Nppa	NM_008725	113.233	3.55637	117.667	3.34979	147.633	6.1974	137.367	1.89062
	Col5a1	NM_015734	3869.33	807.96	3422.9	352.359	10131.7	779.307	8001.93	780.283
	Ap4s1	NM_021710	1344.07	99.1181	1437.93	68.8565	1476.37	31.2974	1863.43	51.0379
	-	XM_127129	235	6.26019	245.5	2.45832	321.467	12.5688	268.367	11.1705
	Yif1a	NM_026553	1401.97	34.1341	1459.83	69.188	1742.2	39.6893	1781.27	49.6916
	Mobkl2b	NM_178061	148.1	9.79047	156.5	1.35031	193	6.40859	176.6	4.83839
	Myl6	NM_010860	21440.5	698.69	22486.6	1141.27	26479.8	72.4333	27135.8	637.219
	Fat4	NM_183221	108.6	3.74344	118.6	5.67215	136.467	3.09049	130.033	1.63333
	Psmb8	NM_010724	134	6.29391	142.167	4.63081	148.1	3.35609	184.9	6.09125
	Tmem77	NM_026013	296.833	14.8613	330.867	10.1785	346.133	4.8841	374.3	7.89958
	-	XM_139474	18356.2	534.354	21988	420.325	18962.2	1197.43	24050.8	911.862
	Podnl1	NM_001013384	125.6	2.62298	126.733	7.22619	162.9	7.2037	154.6	4.21426
	Nr2f2	NM_183261	369.633	13.547	381.733	18.7812	486.533	9.13242	438.067	16.4638
	Slc4a2	NM_009207	2060.17	81.8893	2211.17	73.6094	2526.43	77.9703	2542.23	38.5156
	Epm2aip1	NM_175266	676.767	31.3338	718	34.5588	914.433	23.0969	756.933	20.4133
	Rai12	NM_018740	213.233	7.19776	238.567	7.27835	240.6	5.2	271.967	6.5006
	Mr1	NM_008209	205.5	9.33434	211.433	6.25309	237.467	12.9654	274.367	5.94764
	Prdx4	NM_016764	6329.5	310.837	6399.3	279.707	7527.67	206.844	8330.97	213.884
	6720463M24Rik	NM_175265	542.667	16.4908	1639.6	31.9351	345.867	24.6684	1119.03	47.3729
	Kif24	NM_024241	121.533	5.32677	148.567	2.31036	134.3	4.39242	143.267	2.41132
	Gpn1	NM_133756	945.967	26.8272	1118.73	17.9426	1031.87	17.7961	1160.07	25.0247
	Myh11	NM_013607	99.4	4.07962	105.1	1.11355	124.233	3.40702	118.367	1.10202
	Ftsj1	NM_133991	205.867	9.89248	243.567	7.5351	210.567	11.7906	265.867	2.01191
	Ccna2	NM_009828	307.467	40.1202	794	110.2	263.833	36.6391	638.733	101.203
	Sf4	NM_027481	2199.4	95.447	2441.9	39.6548	2752.27	10.6164	2491.3	83.273
	Chchd1	NM_025366	11788.3	159.795	13072.2	632.821	12664.4	475.411	15419.2	549.471
	Sfxn5	NM_178639	131.833	3.8255	177.167	4.39141	135.233	2.61874	147.833	5.66784
	-	XM_355436	140.8	1.91398	147.867	8.30549	177.267	5.8299	165.9	2.3516
	Wdfy1	NM_027057	187.533	7.44879	200.767	7.59481	248.5	8.22456	204.633	4.62073
	Trp53inp1	NM_021897	184.567	0.533333	176.267	6.49111	465.033	44.38	371.667	19.283
	Tubd1	NM_019756	139.267	1.59199	173.233	6.98435	143.233	2.28789	168.467	1.04775
	Siah1b	NM_009173	234.6	3.72424	282.5	3.32014	238.467	16.9558	295.667	0.648931
	Nedd8	NM_008683	5607.97	182.742	5816.8	190.302	6517.2	306.673	7184.23	215.729
	Thbs1	NM_011580	916.033	121.931	832.5	118.677	1969.63	126.816	2225.53	195.269
	Uqcc	NM_018888	2180.43	66.6391	2365.73	58.4307	2596.53	34.7761	2623.77	20.8687
	Oasl1	NM_145209	141.233	6.33754	161.5	4.61988	148.033	7.49429	181.567	2.66917
	Cwf19l2	NM_027545	665.867	32.8167	800.267	16.6454	685.433	23.5481	824.767	18.7853
	Scye1	NM_007926	6704.23	112.03	7860.13	294.688	6895.47	74.5466	8459.07	181.912
	0610010K14Rik	NM_026757	527.1	12.2132	605.167	12.2182	554.6	32.8051	664.4	9.09084
	Ets1	NM_001038642	2311.8	95.4267	2377	91.9453	2729.23	35.8955	2891.87	81.7304
	Itga9	NM_133721	158.467	7.03096	163.467	4.53076	207.467	3.46234	177	4.48144
	Smpd1	NM_011421	301.133	1.59409	301.133	4.24827	362.767	18.0002	376.867	9.79546
	D6Wsu163e	NM_138594	808.867	1.77044	1004.47	18.3038	844.733	21.8529	946.333	12.7768
	Ftsj1	NM_133991	255.967	14.4859	285.6	5.63205	271.433	6.09763	327.5	4.60326
	Gpr156	NM_153394	107.1	1.18462	118.6	1.33167	119.7	1.59478	131.733	2.4835
	Tmem168	NM_028990	126.167	1.78357	135.267	5.34862	150.067	3.32783	150.533	2.4538
	Pdgfc	NM_019971	1065.37	41.0855	1018.73	32.6325	2226.43	271.041	2560.23	60.3756
	Golga5	NM_013747	716	12.3427	729	28.4556	869.567	12.2262	869.067	28.2669
	Bdh2	NM_027208	708.633	38.3673	590.667	10.2346	1897.37	135.971	1394.43	16.7326
	Smn1	NM_011420	5492.67	267.187	5845.57	47.6612	6242.63	66.4409	6836.47	49.7667
	4933421E11Rik	NM_001039478	212	6.73003	262.167	3.73333	218.833	11.1119	249.2	5.32572
	Gmfg	NM_022024	154.4	4.75219	158.7	2.17332	178.367	2.95879	194.2	4.82735
	-	XM_131633	104.733	6.30617	104.833	2.20404	131.1	0.665833	124.433	3.88344
	Eef2k	NM_007908	146.4	5.34072	164.1	2.10317	179.5	5.87963	159.867	2.65477
	Rbm42	NM_133693	3343.57	64.7471	3477	109.27	4108.27	36.0236	3882.23	8.13333
	Faf1	NM_007983	205.967	3.18451	206.433	4.75722	243.567	2.71805	255.833	3.48154
	Ercc5	NM_011729	864.867	9.22719	921.933	7.25266	999.033	16.3554	1040.8	25.4443
	Reep4	NM_180588	543.033	30.7584	1320.6	74.4022	504.133	26.0974	1123.33	65.0077
	-	XM_134227	208.833	3.89244	213.433	5.69103	261.233	10.0735	239.767	6.28552
	Stk11	NM_011492	1110.87	8.92979	1154.57	19.8713	1263.13	60.2131	1382.33	20.896
	Kif22	NM_145588	1493.4	40.0573	4105.5	159.919	1002.13	67.7921	3227.57	110.954
	Pcbp1	NM_011865	8674.83	289.417	9513.5	237.142	9399.47	209.968	10736.6	271.342
	Fbxl13	NM_177076	113.767	4.91845	113.767	2.11686	126.667	4.9438	148.367	0.75351
	Ccdc61	NM_001033314	146.433	4.62649	177.333	6.66942	148.1	3.89743	174.867	3.57507
	Tnip2	NM_139064	172.067	1.61795	176.933	11.8082	233.9	8.34646	176.867	6.34937
	Sfrp2	NM_009144	132	5.58241	134.433	6.10637	164.933	5.27457	151.367	1.18369
	Il15ra	NM_133836	109.3	0.945163	115.4	3.53883	132.267	4.29935	125.533	2.34473
	Ccdc51	NM_025689	212.133	8.77142	262.967	9.25659	213.933	3.53097	245.867	3.1168
	BC019943	NM_144927	100.533	6.00481	108.2	1.30128	126.333	1.6272	107.933	0.982061
	Cd93	NM_010740	143.667	9.43263	138.6	2.0502	323.367	47.8156	314.633	35.4139
	Atg5	NM_053069	1159.3	11.756	1229.6	34.3075	1312.23	21.8557	1399.97	38.3133
	Slpi	NM_011414	170.133	9.10684	171.8	9.3787	185.733	2.63397	220.5	5.83866
	Rad9b	NM_144912	123.167	3.90142	147.933	2.46667	135.533	2.38421	134.867	2.86026
	Alg5	NM_025442	3428	93.1079	3466.87	50.4796	4042.17	23.8521	4121	29.5579
	Arsj	NM_173451	114.267	2.81504	120.367	2.50355	142.567	4.66988	124.3	0.83865
	Npdc1	NM_009849	125	1.00664	128.267	4.96801	156.933	5.49586	137.2	3.49619
	Rgs12	NM_173402	314.2	15.5058	315.2	9.86053	369.1	9.564	377.433	6.53843
	Syngr4	NM_021482	101.633	1.62207	119.1	2.28108	109.867	2.47813	114.3	1.79536
	Ccdc99	NM_027411	663.9	5.45069	1750.37	95.7938	481.6	8.73632	1406.03	33.5925
	Rasgrp3	NM_207246	151.167	15.392	140.667	12.0211	307.633	27.3006	364.467	43.4984
	Sart3	NM_016926	5811.23	152.23	6645.13	60.5	6235.27	86.8195	6645.27	57.5825
	LOC100039753	NM_001017394	108.267	3.03388	116.533	3.28346	130.5	3.43123	116.733	2.03497
	2610039C10Rik	NM_025642	2105.73	148.512	4626.83	111.104	2002.8	42.8031	4656.17	169.929
	Eri3	NM_080469	247.3	5.43078	265.833	3.43721	278.733	8.3579	285.2	2.0306
	Scly	NM_016717	402.967	11.9714	403.767	4.34063	469.767	13.0693	477.033	11.9136
	Slc7a2	NM_007514	149.7	4.29302	155.367	5.91786	182.2	1.44222	164.133	2.63333
	Ptprv	NM_007955	128.167	1.2441	131.233	4.97538	167.867	3.77065	129.767	4.44685
	Gpn1	NM_133756	2287.33	26.3011	2494.57	106.373	2292.67	71.9899	2844.67	106.202
	Alg5	NM_025442	1365.23	8.89763	1419.37	27.7881	1473.43	46.6667	1651.9	52.5529
	Spsb1	NM_029035	324.833	16.6746	319.467	17.7349	727.567	82.0658	683.967	34.5478
	Limk2	NM_010718	572.967	46.7101	521.5	34.7825	1334.67	74.1061	1201.23	44.9804
	Tmed1	NM_010744	653.333	24.7461	783.033	23.6602	678.9	8.72315	709.567	7.27011
	Pfdn2	NM_011070	4195.57	83.6997	4281.3	64.7988	4996.5	58.4084	4610.17	91.4903
	Zfp566	NM_152814	321.6	9.22894	330.767	17.3327	328.133	6.29824	405.6	10.3621
	Srpk3	NM_019684	116	0.503322	117.867	3.28346	144.1	0.5	121.533	0.674125
	-	NR_002875	41316.1	633.138	41711.4	731.226	46101.4	669.634	48340.6	1052.63
	Tcf25	NM_001037878	5144.43	150.353	5292.93	42.4598	5863.63	117.384	5749.17	79.6608
	Trim68	NM_198012	113.933	4.41752	116.333	1.85233	134.4	2.99388	123.467	1.86577
	Cyp27a1	NM_024264	117.033	1.90992	120.967	2.29298	126.8	2.07445	136.267	3.4973
	H2-M10.6	NM_201611	109.733	0.733333	124.967	2.24524	118.967	0.768838	114.633	2.03825
	-	XM_127523	191.1	10.3184	167.867	4.29974	435.4	63.7896	403.967	35.0524
	Ccdc77	NM_026028	483.767	41.8953	1077.47	105.377	423.3	8.36122	1043.57	47.414
	Htra1	NM_019564	2433.63	273.745	2429.13	191.618	4958.2	528.46	5361.2	277.222
	Adam21	NM_020330	101.267	0.392994	102.967	0.883805	103.133	2.3877	118.633	3.39477
	Popdc2	NM_022318	106.9	2.51064	109.033	1.57621	123.033	1.10504	110.433	2.53596
	F630043A04Rik	NM_198605	429.267	45.0696	934.467	39.8717	356.533	25.8031	950.733	35.1789
	Ifitm5	NM_053088	120.967	1.79382	121.533	0.868588	136.733	2.81089	126.8	1.27017
	Cdc20	NM_023223	572.267	20.806	1383.4	111.992	401	7.42226	1253.57	56.5311
	Kif4	NM_008446	652.767	12.2824	1660.07	63.682	457.867	15.4052	1346.47	22.8097
	Olfr1083	NM_207564	112.933	3.10501	118.6	0.264575	124.933	0.517473	114.8	1.19304
	Fkbp7	NM_010222	894.1	71.1905	872.067	43.1575	1994.17	223.541	1753.17	91.0773
	Zfp423	NM_033327	96.1667	0.952774	104.067	1.07134	97.2	0.702377	100.067	1.21701
	Plk4	NM_011495	1183.03	3.60386	2412.17	129.474	1029.1	105.251	2601.97	147.765
	Birc5	NM_009689	1712.07	59.2373	4294.6	108.604	1246.2	46.022	3344.33	49.8756
	6720460F02Rik	NM_144526	274.467	7.76881	636.5	20.3161	215.1	5.47753	553.767	22.6838
	Trp53inp1	NM_021897	224.233	8.88769	172.3	2.46847	542.433	29.7262	434.3	21.1311
	Gadd45b	NM_008655	884.033	86.227	869.933	53.8179	1868.1	118.819	1705.27	67.2332
	Slc40a1	NM_016917	231.4	29.6925	184.1	15.0028	514.167	36.3374	469.733	10.6905
	Igsf9	NM_033608	407.5	92.1908	394.533	55.3621	809.533	69.186	830.733	46.9023
	Cdkn2b	NM_007670	2664.17	106.866	2609.27	50.5319	5084.77	93.4576	5501.43	350.168
	Trp63	NM_011641	115.6	3.25013	115.5	4.57056	202.167	15.0157	253.9	12.438
	Cd59b	NM_181858	451.033	29.0264	385.533	9.08503	968.8	85.0559	881.233	69.6475
	Cdkn2d	NM_009878	386.2	37.7826	835.733	20.19	321.6	27.1574	759.9	32.1921
	Tpx2	NM_028109	1937.4	109.353	4266.17	195.407	1513.67	90.1644	3857.93	99.8341
	Tgfbi	NM_009369	138.6	14.8042	136.633	3.28448	293.8	16.5186	249.733	22.5569
	Birc5	NM_009689	1099.13	74.361	2708.93	131.861	738.9	19.3856	2114.07	30.9219
	Sgol1	NM_028232	178.967	15.7878	341.633	39.9688	170.733	16.32	364.867	45.1354
	1110001A07Rik	NM_025377	943.967	25.4339	1874.27	32.8591	875.567	65.1629	1871.5	12
	Tgfb3	NM_009368	743.7	105.599	718.533	75.8123	1443.7	97.1352	1452.07	41.4462
	Ogn	NM_008760	121.733	0.775314	116.1	4.2	261.7	9.88956	213.167	8.83484
	Apol10b	NM_177820	133.3	2.49867	131.633	4.78063	237.5	19.29	277.1	24.0583
	Nnat	NM_010923	147.633	13.0831	145.5	13.7019	256.2	17.35	310.267	15.9692
	Lhfpl2	NM_172589	438.967	16.1122	423.367	21.2156	903.8	44.9037	786.967	24.6975
	Rab3il1	NM_144538	171.4	3.26241	170.133	9.54993	335.9	39.3853	318.467	24.5534
	Birc5	NM_009689	1760.63	92.7562	4066.13	107.548	1243.97	6.21298	3357.7	184.373
	Hmox1	NM_010442	814.133	49.085	788.067	18.2368	1543.1	60.3119	1569.23	137.167
	Mad2l1	NM_019499	2481.7	85.2245	4505.9	156.872	2366.3	92.8518	4984.4	68.6145
	Pbk	NM_023209	2200.83	96.4763	4744.43	273.447	1681.1	35.0203	4240.9	204.48
	Foxm1	NM_008021	766.767	40.4377	1597.8	33.9641	639.2	32.0188	1433.9	16.4962
	Ube1l	NM_023738	154.5	14.0194	137.5	7.59013	331.467	12.9544	265.967	23.6694
	Cenpp	NM_025495	458.367	43.0328	789.9	5.04777	433.733	16.1318	941.067	10.4309
	Cit	NM_007708	203.133	8.41474	404.467	20.9078	187.567	8.0524	362.967	22.9957
	Tap2	NM_011530	416.733	29.2567	355.533	24.0654	839.467	43.6534	764.633	43.4979
	Prkag1	NM_016781	732.967	51.502	696.067	51.4328	1382.37	92.0802	1348.63	68.118
	Cd1d1	NM_007639	174.333	11.4674	158.733	8.03416	355.7	24.3644	299.5	9.55737
	Esco2	NM_028039	483.967	8.56355	1009.43	71.3739	396.667	15.8301	864.867	40.2527
	Cbr2	NM_007621	1448.67	56.8967	1372	39.2061	2712	65.5509	2655.07	46.3232
	6430706D22Rik	NM_198652	2001.5	219.824	3919.37	88.187	1772.43	140.248	3623.97	84.2214
	Crabp2	NM_007759	449.633	11.7538	400.1	6.01775	863.1	111.298	824.967	100.455
	Tgfbr2	NM_009371	212.467	7.82823	205.867	10.6067	372.833	17.3496	401.5	13.788
	Enpp5	NM_032003	453	4.74658	358.067	11.5759	946.433	40.3237	810	21.8488
	Tgfbr2	NM_009371	7786.07	828.995	6713.67	435.496	14916.8	603.462	14443.5	404.202
	Llgl2	NM_145438	593.333	51.4233	528.333	46.2684	1120.67	90.9489	1090.2	90.8769
	Iqgap3	NM_001033484	392.033	16.9228	876.267	40.5468	286.133	13.9358	680.2	20.851
	Cdk5r1	NM_009871	1025.23	79.0585	852.7	48.0884	2089.57	105.653	1805.1	53.3106
	Kif3c	NM_008445	484.067	19.5227	444.8	11.8697	963.6	44.9389	813.267	59.6647
	Tceal5	NM_177919	401.833	32.8442	399.533	31.2942	685.567	53.1498	754.433	38.8847
	Efnb2	NM_010111	451	42.3193	371.3	46.05	901.4	110.134	802.667	71.9792
	Ncaph	NM_144818	1677.5	46.2309	3578.07	82.5751	1206.63	23.8762	3048.87	268.698
	Nde1	NM_023317	1166.27	39.8673	2149.37	74.7402	1074.7	18.8868	2075.27	38.5836
	Gpc4	NM_008150	317.567	5.09782	307.733	33.6833	610.9	49.5666	522.5	24.2246
	Capn6	NM_007603	275.067	35.4777	251.833	24.6065	603.867	67.262	391.967	13.6512
	Igtp	NM_018738	133.4	8.06494	124.067	2.64344	225	12.0068	255.467	5.03002
	Dag1	NM_010017	2790.27	218.779	2508.33	176.579	5518.57	96.5429	4614.03	226.32
	4933426M11Rik	NM_178682	1277.3	107.386	1048.43	17.0467	2465.33	75.4196	2291.03	132.224
	Kif4	NM_008446	302.233	14.1264	611.4	48.8815	244.733	4.04654	518.733	23.119
	Tmem66	NM_026432	2535	116.899	2235.53	81.8337	4839.3	150.801	4354.8	214.814
	Kcnk1	NM_008430	747.4	71.6605	605.733	46.7334	1540.07	120.965	1240.37	87.4207
	2310046K01Rik	NM_027172	197.3	1.27671	189.533	5.04656	322.133	10.7172	373.4	27.2929
	Pdgfrl	NM_026840	171	7.60285	169.767	2.66729	326.7	17.8126	270.133	12.232
	Gstt1	NM_008185	152.7	10.0201	140.567	4.83885	292.433	21.749	251.733	5.1953
	Ctns	NM_031251	492.467	9.19136	472.767	18.0274	927.033	99.8026	803.567	60.2617
	Cenpn	NM_028131	614.9	46.7426	1333.43	69.942	474.067	6.07737	983.4	30.4602
	-	NM_011524	319.367	34.9259	567.533	52.9719	283.233	31.8855	578.567	69.5316
	Gsg2	NM_010353	453.2	26.6421	981.133	65.5164	325.167	4.3129	755.467	36.5568
	Pdgfrb	NM_008809	154.467	5.93305	150.4	14.0433	298.733	21.9758	235.167	15.7582
	Cenpn	NM_028131	1265.03	40.148	2793.4	219.794	905.7	20.114	2042.97	107.499
	Ctsa	NM_008906	790.867	85.9347	738.9	85.9809	1430.73	36.5694	1326.37	40.7748
	Adm	NM_009627	129.933	6.20278	128.367	3.2936	205.967	6.84211	238.6	26.4076
	Pdzrn3	NM_018884	1748.27	86.468	1741.97	47.6806	3077.4	267.459	2881.07	347.63
	Casp1	NM_009807	663.2	29.4812	554.233	18.9435	1218.37	123.566	1165.87	67.168
	Ch25h	NM_009890	352.9	41.4515	312.367	35.12	639.433	36.0785	604.767	32.3178
	Nkd2	NM_028186	172.267	8.84408	155.4	7.15821	306.467	30.0183	296.967	22.3612
	Psmb9	NM_013585	155.5	8.56096	154.3	3.82797	260.3	8.80473	268.567	12.8361
	Zhx1	NM_009572	245.033	19.1969	228.733	8.64259	463.933	8.98412	382.033	20.1066
	Sec24d	NM_027135	799.167	87.8555	718.267	50.9361	1403.17	88.1958	1382.33	102.359
	Cdc25c	NM_009860	130.367	4.94177	237.767	19.3778	116.3	8.83421	217.267	27.9099
	-	XM_354690	165.8	6.40937	271.933	18.5315	141.867	9.15429	312.933	16.3306
	Fam20a	NM_153782	148.367	6.99389	133.067	1.39324	284.5	9.24175	227.8	9.16642
	Pbxip1	NM_146131	2980.33	195.999	2890.47	178.398	5223.9	186.417	4785.87	198.286
	Col6a1	NM_009933	1747.97	108.766	1683.43	99.4911	3539.9	15.7214	2319.83	81.8365
	Car13	NM_024495	1117.77	108.523	1035.4	76.9588	1862.83	93.1903	1929.57	38.1809
	Cenpi	NM_145924	361.167	1.91949	680.033	28.6964	282.833	16.8509	616.333	6.37452
	Kif4	NM_008446	268.5	8.90187	540.467	41.7	190.433	2.29807	457.433	10.0668
	Wisp2	NM_016873	133.833	7.3687	123.267	3.01791	221.4	14.1507	232.4	14.3827
	Bub1b	NM_009773	970.733	59.8939	1745.47	137.5	780	41.2275	1700.13	62.6606
	Bzrap1	NM_172449	157.767	4.63909	151.267	17.6698	264.567	5.34925	262.467	10.3895
	Hmgb2	NM_008252	3411.6	261.954	6302.1	312.294	2653.9	105.321	5888.1	117.939
	Cenpq	NM_031863	1478.03	73.0409	2618.47	122.363	1265.57	56.9569	2466.07	47.9533
	Cacna1h	NM_021415	160.2	5.20032	157.7	8.91871	296.733	9.10427	228.667	22.2916
	Amotl2	NM_019764	252.833	26.6641	237.567	27.1888	426.267	37.7455	413.167	31.5708
	Sbk1	NM_145587	621.867	36.2753	480.3	27.8202	1273.37	87.4895	932.8	102.552
	Hmmr	NM_013552	165.133	13.4345	297.467	31.0261	153.967	1.0729	251.467	5.57146
	Mal	NM_010762	515.8	51.8987	502.2	51.4327	780.133	57.8832	908.1	61.2463
	Gpc2	NM_172412	310.867	32.1784	269	15.8437	596.233	67.9428	459.033	15.0327
	Pdpn	NM_010329	1398.93	85.4192	1363.3	49.8975	2287.67	101.222	2274.97	122.575
	Dag1	NM_010017	896.033	72.1102	787.867	48.3127	1597.23	101.89	1423.23	104.888
	Palm2	NM_172868	129.6	6.78994	127.8	2.72213	218.6	10.1484	202.133	9.75403
	Porcn	NM_145908	352.5	10.3099	325.4	8.05067	641.267	22.8008	525.733	18.2137
	Cmpk1	NM_025647	1112.7	100.69	981.7	109.618	1918.43	123.071	1817.6	60.3888
	Gpx7	NM_024198	426.933	37.8926	365.4	18.6752	738.267	71.8693	707.633	20.3881
	Prr11	NM_175563	221.5	10.35	503.333	23.467	155.9	4.55229	298.967	17.6074
	Rell1	NM_145923	1882.2	157.635	1719.43	183.21	3229.2	89.6826	2953.2	137.22
	Bsdc1	NM_133889	357.033	30.7041	355.167	19.1094	621.9	38.1218	518.667	42.0471
	Blm	NM_007550	842.767	10.4769	1358.43	71.5398	774.4	28.9968	1400.8	47.7398
	Psmb10	NM_013640	1143.27	67.0382	1094.47	14.8257	1866.77	61.1468	1823.83	45.601
	C2	NM_013484	316.467	15.6053	275.267	20.4177	567.667	34.9995	486.9	6.64931
	-	XM_131155	276.6	6.98594	490.133	7.80819	235.533	8.85933	437.967	15.6244
	Ncapd2	NM_146171	666.633	18.188	1110.07	19.3406	588.133	8.21509	1098.8	40.9103
	Foxm1	NM_008021	1029.33	43.6973	1926.83	92.4044	795.167	26.7186	1636	60.7281
	Pex19	NM_023041	2571.83	115.596	2180.5	109.735	4160.63	18.5333	4431.6	264.33
	Cdca3	NM_013538	4405.87	138.255	8485.43	423.471	3253.57	144.669	6999.3	246.138
	Melk	NM_010790	262.833	11.5724	488.8	25.8376	212.067	3.51773	403.8	26.1108
	3010026O09Rik	NM_026543	251.267	8.01298	417	4.24539	229.067	4.78377	400.233	19.2789
	Ncapd2	NM_146171	3494.27	116.058	6032.53	143.691	2769.47	21.6654	5903.03	170.38
	Diap3	NM_019670	1310.37	94.8835	2447.73	202.156	1030.53	53.667	2035.43	47.3536
	St3gal5	NM_011375	793.2	64.5175	695.267	8.82144	1343.3	125.152	1263.57	87.7566
	Cdkn1a	NM_007669	1406.63	45.1502	1392.23	82.4638	2116.8	38.5176	2312.03	220.514
	Rbl1	NM_011249	603.4	6.08714	1191.9	21.4854	457.633	2.36807	892.667	11.5983
	Mmp9	NM_013599	424.6	39.8328	367.867	10.7835	792.733	80.9677	604.267	64.7717
	Zfhx3	NM_007496	2254.3	213.177	2221.63	162.451	3774.5	54.0316	3324.43	167.484
	BC088983	NM_001009951	429.833	8.94247	700.033	29.9285	418.5	13.9737	656.1	14.7327
	Pik3r3	NM_181585	1786.37	43.0489	1669.1	37.4027	3025.6	129.738	2687.13	179.027
	-	NM_011191	1841.23	112.384	1804.37	89.4333	2962.87	119.109	2829.1	120.351
	Aoc3	NM_009675	162.967	17.2264	156.667	6.49239	284.8	12.143	229.167	8.06315
	Gsdmd	NM_026960	999.5	40.8857	971.4	74.5882	1529.53	67.8367	1608.37	27.8524
	-	XM_147357	7846.13	105.64	14832.9	572.415	5974.8	259.432	12000.4	609.119
	-	XM_355606	253.867	2.25783	213.467	12.7515	434.667	17.3596	400	22.9589
	Anln	NM_028390	437.5	9.3145	854.2	63.6858	307.8	25.9358	685	31.1426
	Pgam2	NM_018870	167.767	8.03126	162.067	9.38693	293.133	19.2901	231.7	15.6404
	Cdca3	NM_013538	1157.43	84.7407	2147.2	154.742	887.933	16.1675	1784.07	68.7319
	Lpar4	NM_175271	248.167	9.41459	215.467	19.4024	401.733	10.0101	402.633	11.5793
	Mal	NM_010762	1052.73	149.753	928.667	76.5118	1644.9	135.477	1745.13	18.178
	Col6a1	NM_009933	1770.47	122.121	1675.13	163.657	3426.33	85.0095	2131.6	70.0372
	Fndc3b	NM_173182	4157.5	182.597	3839.47	143.338	6661.2	311.145	6477.17	65.1795
	-	XM_130287	2624.57	73.7282	4678.13	119.128	2141.53	24.6045	3968.33	210.016
	Zhx1	NM_009572	198.233	3.98595	179.433	5.56457	341.267	11.7424	287.467	15.78
	Flywch2	NM_029798	308.4	18.1087	287.6	6.70149	494.567	36.4888	472.967	8.73104
	Rcn3	NM_026555	399.467	29.6342	370.2	31.7303	686	36.4862	569.667	34.3373
	Gng11	NM_025331	185.067	14.9949	167.433	11.1293	292.067	3.8843	293.433	20.152
	Rangap1	NM_011241	8235.1	252.848	12820.2	101.509	7435.33	254.234	13212	60.1667
	Krt17	NM_010663	117.033	4.10257	114.5	4.99032	164.6	7.07201	195.333	17.3317
	Marcks	NM_008538	3110.87	126.569	2452.87	159.065	5518.9	673.534	4794.53	217.799
	Col23a1	NM_153393	263.033	3.63792	227.033	6.22102	472.333	54.6193	370.233	43.1942
	Copz2	NM_019877	605.667	11.866	572.2	20.0866	1036.9	77.9734	839.367	60.4643
	Bdh1	NM_175177	349.867	32.0646	277.633	12.0985	595.4	55.9572	557.4	54.8932
	Spc24	NM_026282	346.333	16.8836	538.6	22.1992	305.4	11.3606	557.267	16.1817
	Tubb6	NM_026473	11309.6	388.939	17400.9	594.635	10271.5	981.812	17977.5	701.335
	Stard5	NM_023377	311.233	21.1246	297.933	20.5453	483.9	27.0692	471.167	43.9312
	Gm1673	NM_001033458	413.033	26.7313	386.4	32.6589	677.467	40.9374	598.667	11.813
	Atf7ip	NM_019426	1649.5	49.1227	2518.77	76.2271	1608.43	60.5486	2499.33	45.6847
	Lsm2	NM_030597	1138.2	85.6793	1860.77	17.9921	1100.27	30.8637	1592.5	43.0701
	Cyp4v3	NM_133969	174.6	2.52389	162	6.05558	262.2	2.11266	274.733	11.9834
	Fancd2	NM_001033244	349.5	12.869	596.2	13.9844	277.333	8.76096	540.833	6.5244
	Igfbp7	NM_008048	15817.9	1609.58	15591.5	1347.04	23821.4	1515.29	23719.9	159.491
	Blm	NM_001042527	815.7	32.0865	1286.3	51.1501	673.433	35.0269	1325.67	11.3132
	Tmem66	NM_026432	3803.6	264.847	3338.27	183.202	6300	425.478	5577.6	42.7314
	4930427A07Rik	NM_134041	226.667	27.2798	350.967	8.48063	214.8	16.3148	337.633	5.7736
	Irf1	NM_008390	414.433	36.1158	376.333	17.4709	633.133	31.0927	644.867	21.02
	Pgcp	NM_176073	159.967	6.51315	156.467	7.48539	254.6	5.3454	225.633	8.06832
	-	NM_010884	1905.67	136.943	1700.97	40.1767	3031.6	176.296	2869.83	280.606
	Rasl11b	NM_026878	255.933	11.2146	219.2	12.0193	441.4	12.7649	362.2	23.8865
	Irf1	NM_008390	369.933	38.3767	349.333	25.3778	562.8	11.0639	557	38.7248
	Tmem66	NM_026432	562.2	62.5129	491.967	22.2685	937.367	20.7808	811.333	29.216
	Fam164a	NM_173181	947.3	75.6032	903.833	19.2262	1433.5	65.8385	1418.33	52.1952
	Lsm3	NM_026309	3793.1	127.063	5528.37	292.995	3378.23	70.8542	6159.47	248.485
	Psmb10	NM_013640	1396.9	58.8851	1258.7	17.0063	2172.97	126.104	2108.1	78.2455
	Manea	NM_172865	518	24.5864	435.333	27.3235	833	79.5073	793.7	56.9405
	Mansc1	NM_026345	234.733	4.2881	201.067	16.5868	393.3	34.3104	338.167	15.1721
	Fam110a	NM_146127	180.1	7.64221	263.5	7.65789	177.5	3.3005	269.533	10.1943
	-	NM_033075	2203.77	144.626	3201.43	202.757	2132.4	99.073	3356.73	163.26
	-	XM_129483	482.667	21.4052	781.067	29.7664	446.367	4.61531	670.933	13.9272
	Mxra8	NM_024263	1006.23	64.2554	867.9	42.4943	1756.17	59.6823	1348.6	72.3144
	St3gal5	NM_011375	447.8	11.0639	369.633	14.3708	747.933	27.1927	656.8	41.1889
	Shcbp1	NM_011369	424.067	5.69103	679.433	88.024	346.533	1.67066	653.6	18.8813
	Nde1	NM_023317	1141.77	26.3202	1757.03	96.4717	1005.57	37.4969	1730.93	76.3218
	Psrc1	NM_019976	126.433	6.14121	185.667	8.63353	119.533	1.15518	190.6	7.23971
	Pcdhb22	NM_053147	577.533	31.9148	549.6	13.15	917.7	47.8942	794	56.1644
	Exod1	NM_027698	278.867	9.57868	522.367	26.4922	210.233	15.2719	380.433	11.5277
	-	NM_198678	1396.1	59.8776	1150.1	49.4175	2313.5	82.5934	2048	96.0435
	Emd	NM_007927	734.333	16.9741	730.8	30.8705	973.033	10.9688	1167.07	45.3117
	Rnf26	NM_153762	252.5	13.1465	376.167	8.12862	245.433	16.3533	365.333	16.7139
	Il11ra1	NM_010549	1644.13	67.8617	1622.77	111.752	2555.3	38.5194	2229.97	55.182
	Med4	NM_026119	972.833	36.2779	1398.77	62.7395	941.9	26.7582	1451.43	37.939
	-	XM_144475	199.933	14.2835	328.8	27.7623	165.433	3.54134	291.767	8.10357
	Gas6	NM_019521	224.9	27.7479	220.133	2.53925	332.8	20.4962	322.767	10.4557
	Qpct	NM_027455	266.467	15.3851	242.733	12.2758	402.933	14.2849	393.567	5.39949
	-	NM_146231	355.233	17.4305	527.333	18.3797	353.8	10.5702	500.8	27.8383
	Fkbp10	NM_010221	1273.9	38.9618	1240.77	107.115	1944.83	112.72	1767.8	146.735
	Eya4	NM_010167	208.1	6.66658	202.8	2.92632	298.067	14.4836	308.067	16.5352
	Fut10	NM_001012517	590.867	30.6097	920.6	85.6103	513.367	15.0653	874.167	42.5059
	Ncapd2	NM_146171	451.1	10.4312	718.967	38.4316	353.067	8.09204	706.733	12.0257
	Cdh1	NM_009864	147.7	0.90185	140.6	3.15331	207.467	3.37458	225.333	7.08198
	Xrcc1	NM_009532	981.867	79.3192	1399.5	89.3311	980.467	41.6766	1428.87	57.6168
	2010111I01Rik	NM_028079	619.3	66.3422	581.633	27.036	901.867	37.3593	918.633	51.1079
	Mxra8	NM_024263	441.767	38.0997	385.567	8.04204	751.1	34.8615	581.233	6.9602
	Pon3	NM_173006	494.333	23.9797	471	23.9667	739.633	56.3662	701.533	37.3128
	Nup37	NM_028334	289.367	22.1044	470.667	20.7511	249	3.01993	404.167	9.67494
	Xkr5	NM_176951	186.633	4.74037	284.967	7.96876	165.367	2.99017	272	13.5356
	Nup133	NM_172288	2032.4	23.8917	2909	50.0925	1995.73	32.9829	2931.4	122.849
	Lgals9	NM_010708	499.633	11.3692	475	13.7215	734.867	29.6077	716.367	35.3846
	Chfr	NM_172717	2183.07	130.415	2142.97	75.3968	3290.53	181.788	2977.83	75.2489
	Trafd1	NM_172275	383	9.3675	358.467	21.4193	553.3	33.2653	563.567	18.562
	Golim4	NM_175193	1222.23	67.246	1199.17	58.7597	1811.77	110.419	1692.13	51.3333
	Fam110b	NM_173426	249.6	9.22442	212.333	5.77042	426.267	21.4249	328.067	7.76538
	Pla1a	NM_134102	246.6	13.3133	231.933	13.9492	358	12.0006	358.933	15.3139
	Aplf	NM_024251	210.233	8.35969	299	17.0643	206.2	10.2569	302.967	15.3354
	Mmp11	NM_008606	230.633	6.01286	206.7	20.1219	372.133	26.3021	310.167	10.4436
	Ets2	NM_011809	1663.53	146.142	1455.53	101.066	2383.73	94.8448	2578.4	167.959
	-	NM_198165	1820.03	127.367	1578.7	39.9241	2893.2	63.5713	2548.63	117.562
	Melk	NM_010790	263.7	24.6784	453.767	36.4372	203.2	9.58488	372.4	3.92301
	Zfp637	NM_177684	1274.77	33.2864	1274.2	45.2115	1806.1	142.093	1807.07	95.5982
	Mxd3	NM_016662	137.5	7.22311	206.967	14.3035	122.067	2.80258	199.733	18.614
	Suv39h1	NM_011514	331.467	22.1129	453.833	16.7167	328.633	7.32947	486.967	29.5402
	Lpl	NM_008509	661.4	9.17842	527.467	22.576	1062.27	13.3079	974.733	84.6483
	Idua	NM_008325	239.133	4.12526	233.933	18.0098	337.3	9.83209	343.5	10.3838
	Dbf4	NM_013726	2703.33	73.5492	4616.93	140.126	1915.3	43.2581	4130.83	59.3581
	Rbak	NM_021326	440.8	18.9099	433.9	14.068	655.167	8.34293	595.2	13.1761
	1110003E01Rik	NM_133697	1901.67	183.404	1667.27	50.6185	3110	98.8293	2514.13	94.0337
	Myd116	NM_008654	841.2	71.4394	762.533	41.5715	1308.53	71.9724	1147.27	40.073
	Ndrg1	NM_008681	1283.6	63.9397	1233.77	40.5627	1803.4	148.287	1862.9	84.0124
	Lag3	NM_008479	113.933	5.22505	112.767	7.79366	163.267	4.21162	158.6	8.94371
	B4galt3	NM_020579	1297.77	87.9717	1257.2	49.9514	1873.53	49.6898	1813.1	59.8406
	-	NM_001033207	125.067	7.76688	116.5	0.378594	191.233	3.79049	168.533	7.72277
	Arhgef18	NM_133962	2018.77	158.942	1844.87	105.834	3100.6	136.052	2745.3	37.2464
	D2Ertd750e	NM_026412	444.633	21.0845	844.2	62.6915	291.733	25.022	633.833	24.2755
	Mmp23	NM_011985	671.867	18.4428	640.8	53.1247	1017.57	56.5823	891.167	13.7548
	Mdm1	NM_148922	212.233	5.5107	324.567	30.3946	189.933	8.87869	292.733	17.3168
	-	NM_010396	652.033	18.0245	585.967	21.6827	887.933	21.2104	1004.1	41.0742
	Vti1a	NM_016862	253.9	12.9867	406.7	35.0081	243.033	10.6603	311.633	13.8493
	Ing4	NM_133345	938.9	30.8432	904.633	64.1228	1416.03	93.8912	1233.3	84.4062
	Trappc3	NM_013718	2185	81.8612	2159.2	41.9719	2998.83	149.325	3103.63	99.7234
	Tjap1	NM_028751	849	54.9314	796.1	37.2111	1216.63	88.3842	1197.6	72.4696
	Lgals3bp	NM_011150	484.067	34.6658	391.2	9.00685	769.867	8.93613	688.233	23.1678
	Itgb5	NM_010580	4841.97	420.993	4495.27	230.816	7879.1	298.789	5923.13	257.364
	BC030867	NM_153544	215.467	9.83265	347.733	15.2397	189.567	10.1076	278.767	10.9897
	Lrig3	NM_177152	1155.03	140.663	891.633	47.342	1788.83	135.734	1751.83	103.837
	Nsun3	NM_178925	191.733	1.73813	182.067	5.11251	266.767	23.9389	273.767	10.1627
	2410017P07Rik	NM_026643	338.6	16.5004	505.367	3.45897	299.333	24.4974	475.6	12.9218
	Lin54	NM_172714	1512	99.2676	2306.2	66.3593	1251.23	26.0948	2189.93	149.26
	Mphosph6	NM_026758	1301.4	41.1613	1144.5	27.948	1896.67	56.3183	1876.43	60.0972
	Ddr1	NM_007584	1585.87	109.02	1430.57	115.628	2355.9	90.2915	2191.37	57.9807
	-	XM_356076	529.967	19.3124	734.567	39.5084	515.1	15.8218	739.533	11.7339
	Fam134b	NM_025459	3868.27	166.096	3726.9	70.4597	5520.83	69.0129	5269.4	117.583
	4933407N01Rik	NM_025745	1721.9	138.024	1617.77	24.1993	2411.57	143.07	2433.3	50.6856
	Aldh4a1	NM_175438	1355.53	77.8148	1264	66.1936	1997.2	62.5039	1826.9	12.4857
	Sh3bgrl	NM_019989	2057.83	210.921	1929.4	34.2089	2909.8	104.815	2878.67	105.273
	Marcksl1	NM_010807	3496.8	173.966	3162.57	95.6529	5091.2	283.74	4878.93	104.578
	Accs	NM_183220	254.767	5.93249	249.567	5.63954	374.467	8.62484	329.4	11.0503
	4933407N01Rik	NM_025745	596.733	32.9962	588.667	30.603	835.5	46.0922	808.6	31.9714
	Dnaja3	NM_139307	2145.27	4.01096	1761.73	78.4163	3590.6	267.563	2753.47	106.187
	Ifi35	NM_027320	248.333	12.0988	231.167	12.8094	343.033	13.257	355.667	5.82018
	Ugp2	NM_139297	406.633	24.8994	391.1	11.3006	582.1	26.7001	547.833	4.12647
	Hexa	NM_010421	2743.83	129.889	2521.8	85.0101	4153.7	166.619	3601.67	120.021
	Nde1	NM_023317	342.667	11.2453	510.6	21.5347	320.7	11.0109	450.4	20.7727
	Rnf181	NM_025607	720.9	19.7289	948.233	65.6043	701.3	1.35277	1043.63	44.616
	Atf4	NM_009716	5187.2	226.244	7039.27	153.718	5186.3	449.106	7136.8	378.954
	Cdca5	NM_026410	655.333	33.0982	1020.77	9.40857	522.467	24.3751	936.633	45.1849
	Tia1	NM_146170	373.333	10.083	544.5	27.8647	356.233	13.4918	492.3	11.9718
	BC053749	NM_183321	293.533	16.8306	423.167	22.6758	283.533	13.2691	388.233	7.39602
	Romo1	NM_025946	2469.13	234.894	2263.7	216.96	3480.83	63.9345	3464.1	116.1
	Gpsm1	NM_153410	670.067	62.7093	620.367	22.7384	997.7	66.3099	879.6	62.9073
	Rpp30	NM_019428	2691.2	211.103	3923.4	15.0522	2396.83	89.2206	3722.77	83.882
	Kif23	NM_024245	2317.67	98.1532	5467.07	73.861	1074.33	41.8914	3511.27	197.999
	4931406P16Rik	NM_172741	732.3	29.6071	731.533	24.4997	1025	39.0789	964.8	27.1912
	Tmem205	NM_178577	433.8	14.5569	393.7	28.231	663.4	29.8135	558.733	12.7877
	Mdm1	NM_148922	258.867	6.24108	369.4	36.4846	232.167	2.30241	362.3	14.2732
	Pla1a	NM_134102	212.767	11.9069	199.133	11.4498	296.3	4.6694	294.967	9.32029
	Usp22	NM_001004143	1969.53	89.5808	1954.43	26.467	2773.73	164.847	2578.47	92.0458
	Tnc	NM_011607	626.867	68.8206	512.067	37.8575	986.033	84.3766	852.333	59.0131
	Mtap7d1	NM_144941	1246.4	45.6922	1115.13	91.4383	1744.2	83.7168	1776.3	162.904
	Armcx3	NM_027870	199.467	1.96412	195.8	5.94306	290.3	3.17857	252.333	27.9431
	Zfp68	NM_013844	1232.67	28.9676	1215.63	45.5771	1616.27	72.0764	1730.87	92.7569
	Usp18	NM_011909	118.167	4.69338	111.6	6.85055	155.6	4.33128	170.467	12.6797
	Klc4	NM_029091	434.467	25.2098	339.933	35.3457	718.633	26.0024	574.9	15.3644
	-	XM_196324	203.867	13.0596	199.3	5.95063	319.567	20.0308	234.9	1.5695
	Wwp2	NM_025830	768.633	4.08588	743.833	5.54266	1041.4	12.2973	1055.5	27.0272
	Pou6f1	NM_010127	156.7	10.2015	144.467	5.84076	257.267	11.2974	178.2	19.2204
	C330027C09Rik	NM_172616	434.4	29.6541	629.4	21.3181	381.2	27.4316	600.533	12.7768
	Fam114a1	NM_026667	648.2	30.4756	542.5	23.6528	1084.1	42.4717	786.4	36.3666
	Mllt11	NM_019914	1495.43	211.958	1158.57	155.396	2353.9	189.152	2102.47	37.8204
	Pcnt	NM_008787	230.2	28.9037	327.9	11.724	220.233	14.6254	300.667	1.67365
	Ttyh3	NM_175274	474.1	33.7368	442.033	17.3671	706.233	26.5817	599.5	49.5808
	Tmem86a	NM_026436	773.5	43.3482	600.1	11.0206	1263.63	119.503	1034.07	85.9431
	Melk	NM_010790	221.467	8.14889	354.033	39.4682	177.767	4.54838	293.367	14.4684
	Grn	NM_008175	5136.83	388.804	4505.4	256.316	7427.03	86.0177	7043.5	281.316
	Rad51	NM_011234	960.1	11.4175	1384.9	78.3171	849.1	63.5345	1310.57	66.3985
	Fbxo32	NM_026346	178.367	7.7686	176.6	6.91592	251.533	17.9727	227.667	7.28979
	Myl2	NM_010861	123.8	4.34051	104.133	2.10739	169.167	3.93968	185.467	5.01509
	Vangl1	NM_177545	271.733	10.2131	449.133	7.55542	235.067	6.90032	320.033	22.633
	Mad2l1bp	NM_025649	370.733	25.1272	517.8	38.7621	343.533	22.7264	502.833	17.4333
	Hist1h4h	NM_153173	332.1	7.18633	320.867	13.1638	506.033	11.0584	393.5	15.1071
	Tmem205	NM_178577	514.3	13.8338	462.333	25.172	769.033	27.9136	663.167	4.45808
	Spry3	NM_001030293	236.533	7.13263	385.467	17.6545	207.533	4.61892	279.5	6.33114
	Mxd4	NM_010753	279.167	16.5302	235.367	12.5242	431.267	19.2917	366.167	8.23495
	Ednra	NM_010332	137.933	6.04327	122.3	0.873689	227.4	11.3298	157.567	5.43211
	4933428G20Rik	NM_021493	1058.97	80.367	916.833	58.4183	1621.33	129.365	1362.7	40.0073
	Copz2	NM_019877	630.467	24.6134	554.867	43.875	918.633	49.1171	840.367	39.556
	Mtap7d1	NM_144941	4213.33	150.929	3691.2	136.272	6147.13	326.365	5626.2	185.97
	Ypel5	NM_027166	250.5	30.2604	217.2	30.5012	384.767	4.86118	318	20.9179
	Bhlhe40	NM_011498	2747.03	96.9617	2198.87	41.0132	4051.47	143.112	3906.13	61.9796
	Adat1	NM_013925	205.9	4.18609	292.233	14.0867	191.033	14.0253	268.8	7.66964
	Lsm2	NM_030597	2729.8	252.913	3758.27	287.856	2421.43	74.0276	3813.1	249.965
	Plod2	NM_011961	333.6	24.5006	286.067	13.6988	483.533	24.8289	453.367	14.2933
	D930014E17Rik	NM_020616	378.633	41.3721	358.267	20.406	511.233	20.4602	510.733	0.233333
	Fscn1	NM_007984	3905.17	131.563	3760.67	101.349	5517.6	244.856	4948.63	193.98
	Calml4	NM_138304	233.633	7.0134	197.567	1.68556	350.933	30.2282	308.5	3.66924
	Nup133	NM_172288	1533.23	75.3014	2109.3	93.9869	1389.27	34.9446	2095.57	15.6355
	Fgfr2	NM_201601	127.467	2.05372	118.8	3.18957	177.4	2.45153	167.9	14.5445
	Taf5	NM_177342	449.933	10.539	727.433	27.506	346.333	14.7662	591.667	40.3733
	Apobec3	NM_030255	431.767	23.8055	570.933	8.29826	413.567	12.2382	584.3	20.3913
	Pde6d	NM_008801	460.7	7.17101	596	36.6765	441.933	29.5926	634.5	39.2398
	Tubb2b	NM_023716	4978.77	235.623	8080.67	534.504	3926.2	21.2798	6335.1	148.618
	Hic1	NM_010430	117.3	4.87579	115.033	3.85242	168.6	6.15873	141.7	10.2137
	Acp2	NM_007387	1722.13	29.2138	1666.17	143.756	2200.1	107.676	2378.3	95.3541
	Tmco3	NM_172282	306.733	23.4973	290.5	6.73077	432.8	24.4193	389.067	11.8758
	Dapk2	NM_010019	2381.73	25.1816	2275.43	111.393	3147.23	7.85373	3210.57	137.558
	Kif3c	NM_008445	162.633	9.34208	149.3	3.10859	223.6	5.8046	217.2	14.5946
	Epb4.1l3	NM_013813	3768.93	25.3035	3396	258.656	5595	566.677	4695	151.18
	Psme2	NM_011190	970.8	19.832	953.2	53.9593	1343.93	29.9212	1215.63	74.0937
	Ndufs2	NM_153064	1722.13	127.823	1713.83	31.94	2262.9	82.2981	2253.87	33.6797
	Snx30	NM_172468	201.6	12.5385	168.567	4.73369	318.567	28.1978	248.633	24.2086
	Vldlr	NM_013703	1153.43	83.7677	985.367	30.0742	1617.17	35.981	1598.4	53.9353
	Cdh2	NM_007664	247.533	12.9631	242.367	8.70868	331.767	15.1351	321.3	12.4649
	Tubb2c	NM_146116	11626.5	348.485	22298.1	856.721	6892.17	243.487	16100.4	619.423
	Gnptg	NM_172529	2185.83	134.353	2044.93	127.812	3090.37	104.319	2777.67	114.507
	Htra3	NM_030127	140.933	5.08243	133.467	6.16613	204.767	10.1078	171.533	15.0373
	Nudt4	NM_027722	3402.5	109.953	3325.7	182.986	4533.57	151.309	4438	65.5971
	Rbpms	NM_019733	292.467	13.9853	273.9	4.20357	394.9	13.9871	389.133	25.6519
	Itprip	NM_001001738	429.833	55.8114	346.367	30.5036	618.467	14.0352	606.133	11.7876
	Copz2	NM_019877	373.333	16.1314	354	12.265	534.733	16.2963	457.5	29.4198
	Mlh3	NM_175337	260.867	7.3051	346.233	9.00691	255.033	5.6746	337.733	20.731
	Parva	NM_020606	1410.77	59.1904	1398.9	57.9662	1900.1	80.3	1778.23	102.287
	Ppic	NM_008908	2839.57	62.9429	2746.57	167.453	3728.57	56.2566	3744.97	124.769
	Aptx	NM_025545	324.867	15.0029	321.933	19.0942	409.967	11.8789	437	13.2787
	Il17rc	NM_134159	748.667	40.1906	734.8	43.2541	995.9	31.1337	960.733	4.53738
	Vldlr	NM_013703	818.667	72.7039	691.6	21.3759	1162.57	57.2243	1108.87	37.0667
	Trim21	NM_009277	182.1	4.9085	180.567	1.44261	230.567	2.61937	242.733	3.6979
	Anln	NM_028390	5760.13	203.608	11192.9	469.055	3243.33	115.56	8197.77	102.97
	Gpn3	NM_024216	722.1	18.7673	960.6	22.8685	694.167	30.0347	936.867	34.8573
	Trappc3	NM_013718	542.033	46.5194	471.9	46.0423	712.367	36.1159	770.667	21.1536
	Cdkn1a	NM_007669	743.067	41.2341	617.6	9.0644	970.633	25.283	1101.43	70.3949
	Acvr1	NM_007394	1509.23	37.0199	1293.33	28.841	2263.77	101.447	1883.87	138.517
	Tmem25	NM_027865	180	6.86367	168.367	6.43333	248.433	16.945	228.5	14.8947
	Slain2	NM_153567	1190.8	37.3118	1108.33	64.204	1573.3	94.7321	1587.77	64.1372
	RP23-394O9.3	NM_021440	191.6	3.61156	173.267	2.79066	256	10.6782	258.533	10.202
	-	NM_176995	294.4	8.75043	498.733	38.2257	226.633	19.3291	348.3	33.2004
	Il17rc	NM_134159	1483.3	89.6766	1307.33	82.5579	1978.37	50.7583	2041.4	10.0107
	Lyrm2	NM_175364	478.533	31.2803	444	17.5215	663.233	27.4319	606.333	19.5389
	Nradd	NM_026012	870.467	37.8334	826.133	28.3028	1206.9	80.1418	1081.17	3.14236
	Rras	NM_009101	1630.07	41.9734	1479.33	12.9489	2164.1	81.3697	2199.07	98.2746
	Pigp	NM_019543	2762.9	325.164	2521.4	144.698	3795.87	146.994	3581.13	111.444
	Chtf18	NM_145409	1137.9	105.429	1669.13	5.49707	923.833	48.7678	1520.9	69.0931
	D2Ertd750e	NM_026412	1292.2	46.055	2462.63	109.242	755.533	41.3207	1778.1	71.5794
	Cstf1	NM_024199	2707.63	148.304	3847.03	131.964	2473.47	157.304	3371.73	81.6136
	Arl3	NM_019718	1286.6	123.643	1157.83	86.4963	1819.43	56.9534	1630.5	76.699
	2310022B05Rik	NM_175149	4774.77	354.87	4051.13	330.249	6994.87	270.515	6127.93	142.827
	Naglu	NM_013792	604.9	48.182	507.567	45.2761	859.7	22.6407	810.333	59.2673
	Letmd1	NM_134093	580.367	35.1181	547.033	26.7052	829.633	37.3678	696.533	27.7246
	Enpp2	NM_015744	127.2	4.64866	117.567	0.868588	188.067	9.1136	149.067	13.9224
	Ppp1r14a	NM_026731	150.6	0.11547	148.4	6.01692	190.267	9.37378	197.767	12.4344
	Samhd1	NM_018851	989.9	38.9058	941.9	23.063	1226.6	41.5921	1359.47	59.7918
	Rnf181	NM_025607	3133.47	179.416	3870.67	209.248	3082.33	106.054	4201.6	61.3964
	Atp6v0e2	NM_133764	257.133	15.5187	246.633	18.2311	335.2	6.76042	333.467	4.55351
	Qsox1	NM_023268	434.967	28.1478	387.633	5.14922	609.167	15.9994	555.567	19.247
	Itga1	NM_001033228	210.033	9.01061	190.733	4.58561	280.8	14.0082	277.067	12.4422
	Kif15	NM_010620	782.433	35.1193	1399.43	145.971	493.5	17.1097	1055.2	10.429
	Nup107	NM_134010	558.6	20.9381	748.2	36.5013	512.5	15.2271	726.467	29.2162
	Gnptg	NM_172529	2535.2	39.5482	2392.93	119.58	3390.17	98.9465	3223	191.938
	Fblim1	NM_133754	2180.87	102.905	1903.13	136.703	3058.53	15.4335	2817.7	225.526
	Col6a1	NM_009933	127.933	7.88381	126.5	5.58241	178.567	12.0458	148.867	1.50148
	Dcn	NM_007833	111.967	4.49901	107.433	2.83862	137.733	4.21677	151.933	11.3143
	Tia1	NM_146170	183.867	5.6746	250.5	5.14328	177.633	7.50563	223.8	7.67876
	Ptk7	NM_175168	1207.4	83.0564	956.233	35.0329	1826.73	75.8684	1559.2	9.26301
	Ooep	NM_026480	234.933	13.2645	225.833	8.82522	300.7	11.0699	305.7	13.1154
	Gabpb2	NM_172512	564.333	23.3835	800.867	30.0893	515.2	13.3806	686.533	53.5139
	Ccdc46	NM_029606	198.667	11.4346	247.767	13.7783	189.567	6.64764	266.167	14.8532
	Cenpa	NM_007681	11759.6	314.075	18782.5	435.864	8470.53	566.965	15633.1	764.464
	Maged2	NM_030700	1905.47	122.166	1565.37	66.3906	3050.77	329.036	2199	83.0834
	Cetn3	NM_007684	10038.8	657.591	9818.4	245.513	13052.9	538.801	12647.2	421.291
	Ripply3	NM_133229	142.467	1.10504	134.033	1.61898	176.867	8.62406	193.467	2.19418
	Dlc1	NM_015802	135.533	1.01379	124.733	6.06474	189.333	6.96092	166.033	6.91408
	Rad18	NM_021385	1109.63	94.5443	1866.93	130.394	803.333	76.2351	1367.6	72.634
	Tmco3	NM_172282	290.1	15.9982	271.667	13.0841	379.6	9.75107	374.6	11.3459
	Mettl14	NM_201638	996.233	31.1419	1328.2	46.176	928.7	36.2555	1265.83	59.8875
	Epha1	NM_023580	128.833	6.76888	121.967	3.07752	171.067	6.11046	162	4.35928
	Vwa5a	NM_172767	949.833	47.8904	866.667	23.7688	1336.87	48.4776	1155.9	59.0817
	Snx2	NM_026386	3694.9	322.3	3315.13	283.937	4996.23	131.684	4766.33	263.902
	Faim	NM_011810	1105.7	61.3376	1064.33	59.707	1433.5	14.3396	1403.2	35.5172
	Ndufs2	NM_153064	2380.03	75.281	2354.8	49.9529	2980.7	141.986	3054.27	159.961
	Cdkn2a	NM_009877	10515.5	347.057	9354.27	801.5	14099	478.261	13757.5	898.248
	Pigp	NM_019543	2241.23	199.893	2010.5	129.774	3060.3	156.627	2854.27	138.272
	Slc25a45	NM_134154	201.9	11.7645	195.9	2.96704	265.8	6.09289	249.967	1.59304
	Tmem186	NM_025708	356.4	16.9589	467.067	5.79204	341.867	13.5841	447.367	14.2761
	-	NM_175321	225.8	19.6225	207.133	3.28955	317.233	0.600925	271.633	10.3437
	Mcph1	NM_173189	442.533	20.5086	820.167	32.2532	301.767	1.85502	499.8	23.5676
	Slc22a5	NM_011396	339.267	9.39953	314.1	17.0473	434.033	24.1038	446.6	8.92693
	Gstcd	NM_026231	370.767	18.7635	492.9	3.2909	321.167	4.33372	495.767	23.2764
	Wbp11	NM_021714	5171.47	85.0608	6434.53	161.216	5089.67	65.275	6637.57	219.226
	Rsrc1	NM_025822	761.8	47.3203	1012.77	40.7672	702.6	17.5605	963.367	5.86411
	Lyrm2	NM_175364	525.833	17.4088	463.933	37.0102	711.367	13.4023	678.233	27.0322
	Arfgap3	NM_025445	569.8	41.4399	549.333	23.4126	746.433	25.6095	704.5	19.4423
	Kif15	NM_010620	166.5	12.3158	251.033	19.216	138.833	8.57075	199.533	12.3386
	Gemin6	NM_026053	968.333	10.1916	1431.8	44.7573	742.6	47.1009	1289.33	27.1862
	Slc39a3	NM_134135	214.3	16.6325	202.567	7.08527	269.133	10.1045	280.267	6.69336
	Gnaq	NM_008139	1673.27	137.94	1484.57	94.0725	2326.37	37.895	2078.13	47.7319
	Mnd1	NM_029797	1225.7	101.804	1977.6	155.343	904.6	39.2695	1525.37	32.4507
	Pak4	NM_027470	1376.13	5.78686	1684.63	80.04	1337.17	45.0644	1799.37	45.7285
	-	XM_132322	643.067	51.9049	908.8	18.3506	507.567	41.8683	871.167	21.4172
	Mcph1	NM_173189	459.433	21.4052	792.567	23.1795	336.3	17.2239	523.1	40.4483
	Alg2	NM_019998	323.967	5.31204	322.3	4.28291	429.7	11.3271	381	14.5452
	Tm2d2	NM_027194	2685.67	150.491	2306.53	129.02	3742.33	171.523	3403.43	85.1945
	Eif2ak2	NM_011163	1881.9	98.5683	1598.5	122.314	2639.7	70.7581	2391.7	131.842
	Flot1	NM_008027	2882.87	87.512	2711.97	156.907	3861.17	81.7217	3511.27	64.5576
	Serf2	NM_011354	8059.3	700.87	7755.03	250.03	10697.4	309.512	9701.9	276.145
	Tubb2b	NM_023716	2580.27	36.3603	3807.27	211.358	2006.27	19.909	3353.67	244.488
	Bnc2	NM_172870	129.733	9.23008	122.7	5.57524	159.267	5.13885	170.867	6.86764
	-	XM_354977	622.7	27.3535	798.3	2.93655	597.067	18.2009	776.3	50.8011
	Pdss1	NM_019501	812.833	43.6002	1249.1	37.7195	618.267	38.3468	1026.6	55.0564
	E130308A19Rik	NM_001015681	165.033	13.5825	155.7	2.05994	217.5	4.25323	202.2	7.17658
	5033414D02Rik	NM_026362	2573.3	167.945	2471.93	35.7667	3186.1	117.43	3308.27	78.8341
	Ube4b	NM_022022	1417.13	4.0769	1405.23	40.7996	1740.6	26.7948	1789.37	36.1045
	Fads3	NM_021890	1434.77	47.6048	1347.07	71.6435	1852	92.6991	1801.6	12.8137
	Atp6v1b2	NM_007509	2876.8	115.473	2588	114.049	3718.4	173.152	3723.2	171.827
	Prkx	NM_016979	1031.13	46.3751	981.9	53.4747	1344.37	44.6238	1258.27	48.2917
	2310005E10Rik	NM_172398	1060.3	12.4516	963.7	12.813	1410.57	22.6171	1318.53	14.3232
	Ing4	NM_133345	1467.27	166.117	1341.07	97.9442	2037.23	22.5057	1728.83	34.2746
	Bicc1	NM_031397	142.7	9.24554	136.667	6.93357	193.4	10.9715	165.467	3.38641
	4930503L19Rik	NM_172967	324.767	19.3859	453.533	30.9872	275.1	10.3006	406.667	5.66284
	Psme1	NM_011189	2303.03	103.434	2174.63	54.4016	2836.93	90.2935	2982.1	114.81
	Scube3	NM_001004366	167.367	2.31036	159.067	10.4977	223.567	14.4731	198.1	6.59571
	-	NM_026889	567.2	9.79303	687.533	12.9982	542.533	1.66966	735.3	24.3284
	Vkorc1	NM_178600	812.767	12.9288	769.633	35.6226	1075.2	74.3645	971.6	36.088
	Ccpg1	NM_028181	709.7	37.5075	670.267	17.3849	972.433	41.0211	816.2	48.5818
	Mapk8ip1	NM_011162	365.867	16.1082	351.233	20.6131	500.067	19.9708	415.1	26.5259
	Lima1	NM_023063	4186.37	117.658	3948.47	208.099	5561.43	396.447	4977.33	84.0312
	Flot1	NM_008027	444.733	18.6567	426.9	29.3184	540.267	24.9175	570.633	16.0406
	3110082I17Rik	NM_028469	381.667	10.3514	541.7	40.942	339.533	10.0655	442.867	21.4493
	Faf1	NM_007983	4089.8	38.7159	4000.03	91.0072	5064.2	130.338	5069.7	139.439
	Sdpr	NM_138741	134.033	1.67564	127.067	4.46667	160.8	5.49758	175.4	7.24178
	Vldlr	NM_013703	832.367	80.5207	681.833	9.06446	1107.27	52.1795	1115.7	45.5059
	Mpnd	NM_026530	1435.4	8.65698	1399.83	38.9318	1889.67	67.865	1660.73	110.413
	Mutyh	NM_133250	172.433	9.17902	229.5	12.1533	160.067	4.88274	205.7	6.86464
	2410129H14Rik	NM_175245	990.033	32.1276	1301.13	35.1045	892.3	26.3077	1229.1	72.6126
	Slc6a8	NM_133987	768.767	23.0409	654.4	77.5017	1060.47	28.8704	954.033	60.1909
	4932441K18Rik	NM_178935	302.467	2.83862	404.2	16.2525	285.433	5.48766	353.367	2.73394
	Stag3	NM_016964	248.533	8.98338	235.7	5.95007	313.533	11.0013	307.567	13.8073
	2310061C15Rik	NM_026844	956.733	81.33	1326.17	72.8296	831.3	60.8624	1156	59.4385
	Csrp2	NM_007792	3234.63	69.808	2365.47	44.5693	5408.73	355.507	3681.23	166.655
	C230052I12Rik	NM_178643	187.867	7.95997	241.467	3.86106	166.1	4.27551	242	14.0735
	Ift122	NM_031177	562.133	9.27907	555.1	12.9701	744.967	14.7642	634.633	26.01
	L3mbtl2	NM_145993	798.933	24.6354	1099.3	51.1722	636.1	38.9123	1055.53	9.58216
	-	NM_183021	378.767	16.2985	559.867	25.9687	312.733	15.3016	444.533	23.515
	Slc39a7	NM_008202	369.1	24.1961	333.3	15.77	492.167	23.6204	448.267	27.6541
	Cenpm	NM_178269	240.833	5.44712	286.967	12.0231	235.467	8.51163	306.233	9.09145
	Fbxl22	NM_175206	141.2	4.10163	121.433	0.768838	205.2	7.9019	162	7.71751
	Bax	NM_007527	2182.2	55.8036	2066.83	12.4199	2669.57	102.418	2767.73	107.998
	Dtx3	NM_030714	1621.9	60.2135	1566	115.797	2172.67	102.031	1831.63	8.27875
	Lima1	NM_023063	4578.53	154.922	4270.17	342.684	5853.97	79.9409	5616.1	86.1164
	Acadm	NM_007382	5339.83	363.254	5025.8	231.805	7020.87	136.632	6287.4	201.042
	Matn1	NM_010769	134.2	4.92172	133.867	6.63861	160.6	3.40783	165.7	5.8731
	BC055324	NM_201364	449	12.5157	619.533	10.3554	353	13.4879	592.967	16.3693
	Parp2	NM_009632	817.067	20.1784	1135.23	44.0836	710.433	36.6053	971.567	37.8264
	Rell2	NM_153793	269.767	11.611	230.9	4.88672	403.9	22.3288	296.5	4.05832
	Ppp3ca	NM_008913	2438.17	92.7453	2095.43	199.904	3413.93	108.933	2895.1	56.2285
	Ankrd54	NM_144849	776.267	21.895	1009.83	14.5238	742.233	22.5526	906.867	54.285
	Rad54l	NM_009015	447.2	33.5633	593.433	19.5684	382	21.9208	566.267	17.8298
	Plcl2	NM_013880	501.4	40.1042	434.367	10.0655	689.667	25.7802	602.167	33.3439
	Lmnb2	NM_010722	743.033	60.6492	1090.8	84.6386	594.233	28.7897	894.6	67.9743
	Midn	NM_021565	4612.1	76.3351	4605.67	43.9038	5641.87	114.347	5532.77	45.3412
	C230052I12Rik	NM_178643	155.567	3.73512	204.767	10.1276	147.5	6.32218	180.433	10.1103
	Laptm4a	NM_008640	4160.43	117.828	4014.03	218.99	5199.1	190.646	5015.8	232.644
	Taf5	NM_177342	169.767	6.5244	237.967	11.5675	149.467	1.44491	195.667	5.10044
	Uchl5	NM_019562	1927.77	139.727	2527.07	155.373	1717.13	42.6798	2370.93	16.6397
	Pols	NM_198600	1505.93	65.5607	2005.37	73.5356	1286.93	53.7747	1891.87	74.0288
	2610021K21Rik	NM_030172	161.6	6.23859	206.1	9.98349	133.733	1.76383	218.1	6.83691
	Tubd1	NM_019756	179.8	3.81576	232.067	10.3254	164.9	5.91974	218.5	5.44426
	Pkn3	NM_153805	307.067	16.3179	437.1	21.47	259.233	9.70504	361.267	13.7174
	Dusp1	NM_013642	2179.63	139.608	1584.5	184.532	3465.4	195.758	2616.83	229.663
	Tapbp	NM_009318	310.667	22.9713	282.633	6.72219	384.467	22.8597	396.267	11.0969
	Fermt2	NM_146054	5967.07	71.8641	5753.2	142.134	7381.37	142.714	7230.9	84.0578
	Kcnh2	NM_013569	216.867	16.8334	193.7	7.0812	310.4	19.2505	238.5	16.4214
	Abtb1	NM_030251	321.6	10.2021	312.367	2.22136	433.467	13.4107	351	25.5508
	App	NM_007471	5926.8	543.122	5250.77	129.033	7700	331.85	7321.67	237.433
	Sgol1	NM_028232	113.167	3.39231	142.333	3.69564	108.4	8.52819	134.767	2.98347
	Fam122b	NM_030167	172.533	13.0646	234.167	9.03426	149.4	2.08167	207.333	5.53333
	Rapsn	NM_009023	465.4	26.9739	428.833	12.5285	568.167	16.261	589.6	20.0543
	Nxn	NM_008750	10471.7	535.613	10224.1	194.178	13686.8	256.246	11706.2	563.837
	Nfe2l1	NM_008686	4395.77	219.546	4164.7	39.3519	5372.27	83.1334	5423.97	63.8646
	Arhgef6	NM_152801	157.433	7.80263	148.633	3.51394	197.933	7.55344	189.167	5.01675
	Tmem107	NM_025838	536.5	44.9179	609.533	11.0746	517.267	14.2391	696	10.3467
	Rfx1	NM_009055	866.7	31.2684	1088.7	37.8299	841.2	17.4697	1013.83	45.0224
	Nfix	NM_010906	1157.83	65.3023	1052.3	58.3624	1549.3	69.1532	1340.2	13.2729
	Tpp1	NM_009906	765.467	15.0834	647.633	10.5673	1050.57	41.0009	921.267	43.6343
	-	NM_146186	158.967	2.71682	191.9	1.5695	149.033	8.03043	198.933	13.263
	Yipf3	NM_145353	1718.53	53.2672	1648.97	78.7837	2145	33.5286	2035.5	65.1044
	-	XM_109794	211.333	7.10923	208.5	10.7037	278.467	6.30141	229.567	8.74115
	Ccdc43	NM_025918	1334.17	27.7087	1569.93	44.205	1284.33	24.7461	1668.83	47.6523
	Mutyh	NM_133250	138.8	1.38924	184.567	3.74715	132.3	4.93187	153.5	4.05134
	Wdr70	NM_001081402	319.267	9.28302	360.2	13.308	317.533	5.73217	402.933	11.6104
	Mns1	NM_008613	1705.87	108.252	2547.03	22.2578	1263.07	35.2459	2118.8	55.6188
	AI747699	NM_001013770	190.667	6.61547	170.433	8.25718	246.067	19.1216	231.2	6.15873
	Dpagt1	NM_007875	2469.87	28.2499	2992.03	81.1431	2422.57	33.7321	2937.53	125.45
	2510039O18Rik	NM_029841	421.2	6.90024	395.6	15.1309	507.833	6.66767	522.067	27.207
	Fbxo25	NM_025785	930.967	55.612	868.1	42.2756	1212.27	7.40188	1067.07	27.0003
	Siah1a	NM_009172	564.667	4.09932	530.767	27.8991	711.967	24.5375	664.833	25.2914
	Zcchc8	NM_027494	1518.07	65.2974	1838	74.8993	1480.03	51.3267	1805.07	39.1725
	Cnn3	NM_028044	7227.5	429.114	6574.53	214.809	8841.03	47.0964	9028.07	301.738
	Cdc2a	NM_007659	140.033	4.2881	193	8.65871	119.3	4.6188	163.633	4.7365
	B4galt3	NM_020579	426.1	37.6331	383.2	18.7431	538.2	15.7576	520.567	11.321
	Evl	NM_007965	1541.13	77.5677	1469.43	33.8642	1960.57	30.0278	1770.43	63.2837
	Parp2	NM_009632	1710.1	84.7925	2282.4	59.8194	1525.53	9.04108	1980.87	62.109
	Tcn2	NM_015749	330.233	13.5376	294	19.1366	438.467	6.90032	385.067	9.00302
	Pex11c	NM_026951	211.8	6.0302	197.267	0.800694	249.633	11.4027	267.833	4.56703
	Shd	NM_009168	140.833	6.38496	133.867	7.59327	182.4	2.40069	158.633	6.87249
	Gabpb1	NM_207669	493.667	6.72541	484.5	4.01497	535.467	16.6818	643.333	29.9001
	-	NM_026881	3099.3	119.302	3074.3	60.38	3582.33	61.4983	3776.53	153.114
	Gtf2ird1	NM_001081462	1020.6	23.9075	932.733	31.3881	1316.2	59.0182	1193.87	13.9008
	Gabpb1	NM_207669	365.667	8.98004	341.267	20.5193	426.167	8.69374	464.7	17.1105
	-	NR_002928	549.6	17.0735	510	13.4726	671.4	22.0123	670.333	19.2375
	Shisa4	NM_175259	262.133	15.4825	242.2	3.92471	351.333	17.0389	289.5	2.75015
	Dci	NM_010023	2013.17	53.6647	1926.37	100.808	2450.67	83.5842	2394.5	65.5976
	Gemin6	NM_026053	1037.63	34.5836	1481.97	56.9124	777.533	42.9838	1313.57	28.8632
	Casp12	NM_009808	143.567	5.92659	137.033	0.788106	175.233	0.731057	170.267	2.21836
	Ryk	NM_001042607	2460.37	45.1197	2209.53	37.9251	3086.2	43.3931	2995.03	137.247
	Mcph1	NM_173189	151.267	2.78348	199.367	6.59655	146.967	2.32546	161.6	5.25008
	Zcchc8	NM_027494	2661.73	135.149	3460.7	95.4144	2617.9	135.594	2857.4	77.3622
	Rb1	NM_009029	464.933	4.60374	387.6	11.5154	638.267	49.3871	549.667	16.9496
	Paip2b	NM_146169	3458.33	56.3015	4045.77	34.3153	3310.07	115.585	4253.57	155.963
	Pknox1	NM_016670	276.3	15.7424	343.467	14.6449	256.767	12.4719	328.2	7.81729
	A2ld1	NM_145466	286.9	7.11407	257.133	8.7621	362.1	7.94754	346.567	9.15502
	Bcl9l	NM_030256	1521.57	102.6	1374.97	9.67218	2080.7	66.765	1663.47	98.6439
	Igf2r	NM_010515	1404.5	124.199	1206.7	63.148	1984.37	110.708	1550.87	120.905
	Ly6g6c	NM_023463	113.4	5.62168	109.7	3.92726	139.6	3.96274	131.033	3.27635
	Klk8	NM_008940	131.167	5.15407	121.433	4.96197	164.3	5.03322	154.2	5.76223
	Map1lc3b	NM_026160	2911.9	217.016	2478.3	58.3509	4154.37	211.069	3188.23	108.962
	Cbwd1	NM_146097	1325.93	70.6526	1675.13	70.9785	1213.43	23.4544	1557.37	24.0915
	Agpat6	NM_018743	5043.8	104.755	4737.1	52.4609	6412.77	139.051	5733.67	217.877
	Mettl9	NM_021554	3322.5	282.805	2867.33	107.26	4199.03	172.889	4111.17	221.066
	Snupn	NM_178374	669.267	29.2549	781.267	7.96457	669.067	21.1994	786.567	6.12028
	Wdr6	NM_031392	2993.13	194.978	2712.1	210.193	3962.7	145.999	3353.77	124.44
	3110040N11Rik	NM_026077	147.167	1.96497	145.267	6.21298	180.2	4.65009	166.133	3.67892
	Itgb1	NM_010578	1636.47	86.7868	1419.07	3.37754	2080.37	151.144	1998.13	47.6298
	Lrrc40	NM_024194	284.1	6.75056	345.133	3.1798	258.5	9.44475	347.133	13.6338
	Asf1b	NM_024184	564.767	24.9726	833	25.1088	417.367	8.96964	684.733	15.548
	Vcan	NM_001081249	158.333	5.48341	152.267	4.51085	193.033	8.12288	182.533	3.7618
	Nup43	NM_145706	1323	60.3684	1558.17	40.7949	1242.2	56.843	1610.83	55.7783
	1110059E24Rik	NM_025423	1691.93	78.1947	2013.67	43.3118	1687.67	56.8535	1933.1	18.3713
	Ddx20	NM_017397	3959.63	240.694	4835.2	43.7951	3277.17	254.453	5213.5	152.396
	Tfdp2	NM_178667	408.067	22.267	393.8	7.54983	468.267	18.0379	496.833	9.02447
	Ubox5	NM_080562	524.1	9.73259	647.8	16.752	485.5	1.97315	614.233	19.5622
	Skiv2l2	NM_028151	6035.83	141.605	7358.93	347.882	5667.27	262.929	7087.23	162.567
	Tle6	NM_053254	488.533	44.0903	461.6	33.8353	674.733	18.0343	490.767	15.0776
	Sec61b	NM_024171	1975.13	103.47	1948.77	3.46715	2444.43	47.5604	2177.9	57.4422
	-	NM_198413	1354.83	87.508	1146.9	136.967	1715.8	25.7132	1680.87	11.3257
	Gzmm	NM_008504	159.033	6.42763	126.9	3.25167	230	15.9502	180.067	9.81026
	Dars2	NM_172644	261.6	8.20325	357.733	18.992	220.833	3.75648	298.467	12.4588
	Rab5a	NM_025887	1539.2	72.4515	1318.73	62.4902	2063	77.5071	1769.37	91.2046
	-	XM_130317	2727.77	78.6915	2628.8	32.3818	3155.2	38.1452	3282.3	114.806
	Exosc8	NM_027148	4340	112.204	6016.57	133.183	3423.43	167.629	5223.1	41.3842
	-	XM_127738	7248.93	134.242	8609.37	116.347	7165.73	80.1491	8306.7	124.199
	Asb3	NM_023906	465.467	11.4601	550	5.51392	456.833	19.3851	539.567	15.3469
	Fjx1	NM_010218	126.367	2.10581	112.333	8.2228	165.667	3.84375	143.333	0.829324
	Mtbp	NM_134092	1464.87	38.2996	1965	73.9759	1232.33	27.8918	1708.47	88.4352
	Cdkn2aipnl	NM_029976	2316.9	59.615	2630.3	52.2989	2216.17	81.5289	2847.23	134.228
	-	NM_178049	2105.2	218.113	1707.2	97.0248	2923.9	58.2083	2440.87	155.053
	Stk32b	NM_022416	161.067	5.17183	154.533	5.88142	175.8	9.16751	203.833	2.62446
	Pld3	NM_011116	479.8	18.564	425.3	19.5255	656.133	36.7866	515.767	43.8294
	Tubb2b	NM_023716	1884.1	57.7297	2728.77	222.835	1369.03	36.65	2339.73	90.8132
	Gdf5	NM_008109	113.767	2.59829	112.633	1.68951	128.367	1.0729	135.933	2.65477
	Nbl1	NM_008675	1181.77	43.0652	933.367	30.1846	1800.7	77.1509	1246.93	56.6254
	Tmem55a	NM_028264	3108.7	127.955	2988.53	99.9727	3636.5	96.9273	3673.87	90.9917
	Narf	NM_026272	190.967	1.54524	183.2	4.94874	228.267	4.32255	221.2	11.9776
	Syap1	NM_025932	1555.4	101.407	1462.23	46.8814	1917.27	37.8076	1776.03	65.7834
	Cdca4	NM_028023	1141.2	60.4229	1575.13	92.5512	912.367	17.518	1347.9	52.2623
	Znrd1	NM_023162	4378.87	147.308	5576.1	128.412	4210	181.465	4713.9	165.378
	Spcs1	NM_026911	16643.1	482.829	16524.7	272.293	19736.9	425.144	18801.1	608.819
	Tubb2b	NM_023716	2891.9	88.9387	4245.47	324.72	2149.13	29.5712	3428.93	126.26
	Diras2	NM_001024474	119.633	0.726483	111.533	3.86106	148.4	2.8006	136.267	3.98595
	Ddx58	NM_172689	203.667	11.4319	182.7	4.50037	252.233	7.60358	240.6	1.55027
	H13	NM_010376	1565.5	47.3589	1457.47	43.155	1932.3	88.6508	1790.07	29.4418
	Trps1	NM_032000	1094.6	60.3994	934.067	16.4621	1541.83	71.6367	1166.93	69.7675
	Lamp2	NM_001017959	1965.63	28.2316	1836.87	63.4277	2473.1	138.356	2185.8	19.1103
	5430437P03Rik	NM_026636	1853	56.3847	1811.13	105.929	2052.73	1.97428	2250.77	36.6564
	Klhl22	NM_145479	1933.23	106.015	1685.6	114.195	2437.13	98.4056	2291.93	45.8437
	Lzts2	NM_145503	2430.2	45.4588	2246.57	169.438	3127.63	119.222	2656.3	17.3785
	Magi3	NM_133853	165.767	2.91681	162.633	4.60483	191.167	2.27327	192.833	8.18318
	Ccdc32	NM_199310	1013.2	38.3987	1216.43	9.69559	1009.63	28.718	1111.93	5.05712
	Nfil3	NM_017373	1077.13	40.8716	954.8	28.2463	1383.47	43.4728	1225.93	80.475
	Ppp2r5d	NM_009358	820.8	16.8194	962.233	39.8787	784.833	22.3954	957.567	28.8221
	Aktip	NM_010241	292.6	9.19366	286.367	7.97001	343.167	9.00469	333.133	4.12203
	Rrm1	NM_009103	3580.87	34.2456	4403.83	155.233	3185	183.915	4239.27	156.538
	Ctsk	NM_007802	119.633	5.1174	119.6	4.16053	149.9	5.33135	124	3.76431
	Nkain1	NM_025998	209.5	8.80019	196.633	6.6021	274.367	14.6438	218.6	12.8827
	Ripk2	NM_138952	313.067	2.8881	251.067	14.8279	415.967	9.99272	377.367	11.4171
	Akr1a4	NM_021473	8131.17	296.111	7365.17	246.245	9942.23	367.045	9492.73	237.723
	Hmgcl	NM_008254	1426.17	60.6743	1248.3	19.7122	1939.4	92.7825	1523.37	56.6201
	Nmnat3	NM_144533	124.133	7.20748	153.133	5.37287	119.833	2.03415	134.933	1.83515
	Osbpl2	NM_144500	871.667	65.3385	763.233	15.7751	1162.97	42.9314	950.267	12.2358
	Gpr153	NM_178406	134.467	9.45592	116.133	4.16907	180.567	13.4043	147.467	1.54955
	Tmed9	NM_026211	16324.2	628.685	15507	328.92	20153.5	554.911	17951.5	487.633
	Ldb1	NM_010697	5552.7	433.654	5030.17	77.0693	6814.87	257.06	6426.97	72.5349
	1700029G01Rik	NM_025856	185.5	1.35769	174.067	1.22384	232.467	6.5763	202.333	7.25381
	Akr1a4	NM_021473	7058.4	277.629	6619.53	184.84	8538.93	126.376	8007.93	355.933
	Cnih	NM_009919	2928.33	78.2806	2822.13	45.0396	3081.33	116.692	3696.17	124.152
	Golga2	NM_133852	1439.4	82.5967	1357.8	73.4369	1819.3	30.985	1543.33	62.3904
	Rbm9	NM_053104	1036.17	57.1401	904.267	3.08995	1317.53	36.8556	1191.43	66.2585
	Marcksl1	NM_010807	433.233	24.371	329.367	6.37974	586.367	15.559	535.433	48.9863
	Coq4	NM_178693	197.667	6.43074	249.933	5.36542	187.6	4.24421	210.167	2.96779
	Kcnh2	NM_013569	179.2	3.53034	154.867	8.25274	233.367	9.53596	202.1	11.201
	Ciz1	NM_028412	2590	53.6426	2518.03	50.2001	3004.6	90.4816	2955.4	94.8228
	Zc3h12b	NM_001034907	113.333	1.5857	111	1.79258	140.333	6.69735	119.567	3.99764
	1110049F12Rik	NM_025411	1261.1	27.8776	1555.63	55.7298	1122.7	25.2024	1463.97	38.7903
	Znrf1	NM_133206	249.533	14.0383	236.267	6.96882	306.733	2.4504	273.533	2.86725
	Taf5	NM_177342	178.767	10.3557	241.933	14.2577	154.033	3.72842	192.3	10.5078
	-	XM_131022	178.433	10.3949	220.3	10.3693	162.667	3.88559	201.533	2.33619
	Vkorc1	NM_178600	2057.83	41.2319	1887.37	38.206	2482.67	122.044	2368.17	56.4221
	Atp7a	NM_009726	355.233	15.737	314.5	7.80534	454.033	13.0269	396.033	3.67892
	D2Ertd391e	NM_145528	586.267	28.8571	567.4	6.31374	698.167	6.22477	647.967	6.14609
	Insl6	NM_013754	450.4	29.1325	397.533	19.8583	556.567	16.3381	522.167	12.5329
	Gsk3b	NM_019827	592.1	15.2018	542.333	13.2167	729.033	28.7521	664.033	20.6133
	Mgst1	NM_019946	256.767	19.946	194.667	16.2686	353.367	12.616	309.033	17.7672
	Pgm5	NM_175013	127.033	2.0955	116.333	3.43624	158.767	5.1686	139.9	8.92543
	Dus4l	NM_028002	379.8	17.1197	487.6	5.28488	336.5	10.8885	418	30.0127
	Krt80	NM_028770	237.533	1.05883	273.167	6.64087	223.567	5.68311	277.2	12.8829
	Ilf2	NM_026374	7459.97	295.134	8668.63	154.961	6410.1	118.817	9358.73	457.489
	Mtmr14	NM_026849	1319.87	37.7583	1764.17	25.2266	1152.8	19.2344	1399.73	54.9016
	Mrps17	NM_025450	4871.93	139.314	6043.57	216.281	4513.1	90.9382	5304.73	133.935
	Nrip3	NM_020610	121.667	0.783865	116.867	2.86376	133.767	6.04768	144.833	4.30749
	Ift20	NM_018854	3266.37	197.68	2780.37	63.7527	4330.1	116.429	3568.57	66.9922
	Aaas	NM_153416	243.8	2.51661	282.133	11.0339	208.667	15.9303	305.733	5.8749
	Lig4	NM_176953	301.2	4.93694	272.333	9.93753	357.833	8.77237	349.533	19.4183
	Mrpl35	NM_025430	335.433	14.5567	388.867	2.29298	304.633	9.7554	396.633	1.95477
	Agtrap	NM_009642	634.767	19.0577	605.767	11.2584	764.5	26.604	687.833	16.084
	Pnkp	NM_021549	518.067	32.9366	675.933	27.0129	479.3	16.8298	526.433	10.8913
	Mrpl1	NM_053158	1090.83	38.0286	1338.7	52.1715	1003.7	46.826	1196.87	34.0969
	Rhbdd1	NM_029777	1198.73	42.7632	1465.73	75.256	1098.7	21.4001	1325.63	37.0207
	Rnf6	NM_028774	2073.53	52.7031	2464.1	51.8072	2048.37	62.8291	2198.73	64.3089
	2310035K24Rik	NM_027129	351.033	21.0667	422.3	10.1106	330.333	6.9066	384.1	5.57524
	Ppp2r5e	NM_012024	2085.13	77.4985	2361.07	42.1442	2032.93	17.1664	2351.4	53.7176
	-	NM_153536	164.7	2.70617	173.733	5.584	194.833	2.48752	164.1	3.11929
	Apoe	NM_009696	241.933	10.0614	201.267	12.1806	335.067	17.5306	254.133	5.9468
	Cdca4	NM_028023	4949.27	255.437	6398.6	406.849	4026.7	249.446	5777.87	220.228
	Kctd6	NM_027782	300.867	8.30348	294.833	6.2834	319.867	7.89458	357.5	13.0415
	-	NM_175404	338.1	8.32006	315.4	10.2246	387.433	9.87258	390.367	2.06908
	Runx1	NM_009821	559.8	31.3962	813.8	74.4867	451.533	14.9037	567.867	18.571
	Mmp16	NM_019724	242.767	6.48314	202.267	14.4003	318.667	13.5981	270.733	17.2324
	Cyhr1	NM_180962	932.667	40.4141	834.967	48.1334	1209.5	62.5415	974.6	41.6626
	Sema6c	NM_011351	121.167	2.95654	141.033	3.38247	128.533	2.40993	121.1	2.57747
	Olfr38	NM_146986	113.533	2.47274	112.533	3.85242	128.633	2.43607	124.667	0.866667
	Rad1	NM_011232	588	16.6656	672.7	10.1658	545.733	15.7169	679.333	25.3991
	Siah1b	NM_009173	418.233	2.14813	482.4	23.8076	373.5	6.63425	496.867	5.44712
	Hspb1	NM_013560	5029.43	69.1154	4404.37	254.117	6037.27	290.381	5849.7	298.312
	Flrt3	NM_178382	3539.93	193.565	2660.63	70.1738	5031.67	436.583	3994.63	225.398
	Daam2	NM_001008231	159.2	3.36452	153.467	4.05517	180.767	5.34052	178.467	4.56813
	Akr1a4	NM_021473	9205.33	494.155	7824.03	206.207	11275	399.935	10776.5	344.06
	Swap70	NM_009302	786.1	22.0565	643.867	33.4762	1067.9	43.0039	849.933	30.8288
	Prr7	NM_001030296	466.933	22.8643	412.833	18.2524	570	7.60022	527	10.0321
	Tmed1	NM_010744	2497.27	88.4676	3071	45.5316	2256.93	45.3779	2729.43	37.2475
	Smc1a	NM_019710	2284.4	60.5429	2808.73	27.3689	2069.47	94.2196	2487.17	43.7993
	-	NM_028726	135.167	2.373	130.1	3.38083	160.867	4.57396	143.633	5.53785
	-	XM_128634	3967.77	107.506	3477.63	38.0495	4938.67	139.71	4404.4	245.412
	Fbxo34	NM_030236	808.9	26.0849	997.833	30.8143	738.5	39.1296	868.033	13.345
	-	NM_028726	112.567	3.61032	106.6	1.15326	132.1	1.74356	123.067	4.9411
	Prrc1	NM_028447	923.833	46.3851	692.3	28.1727	1370.4	72.9586	980.9	84.5502
	Tubb2b	NM_023716	21584.6	227.261	29304.6	1348.85	16912.6	603.083	24364.7	631.986
	Tpi1	NM_009415	14971	468.037	13954.8	112.357	17321.2	353.385	16793.3	467.852
	Lsm8	NM_133939	6904.67	273.605	7920.07	200.237	6412.03	93.4265	7820.53	76.1507
	-	XM_142269	115.533	2.0177	128.433	2.08833	127.733	3.14872	113.667	0.384419
	-	XM_194070	739.067	48.2017	945.2	32.9864	598	14.8956	855.533	25.3522
	Rttn	NM_175542	326.233	4.32371	440.4	19.0886	264.6	6.9515	352.6	9.02903
	Palm	NM_023128	340.233	13.4205	312.9	10.5432	425.233	15.8048	352.067	8.73543
	Nup85	NM_001002929	3610.03	300.499	4523.77	39.912	2899.5	43.0728	4285.1	77.2313
	Fanci	NM_145946	220.3	6.60101	292.3	2.02237	169.667	7.90239	256.767	10.203
	Ing1	NM_011919	1069.63	62.6835	1344.7	79.6717	918.133	41.0175	1176.5	28.2985
	Tor1aip1	NM_144791	1045.33	25.9112	867.433	39.3836	1305.27	44.786	1199.8	15.1533
	Nfkbib	NM_010908	233.667	2.22436	202.1	6.50641	290.867	12.724	257.167	10.8413
	Hirip3	NM_172746	1341.83	13.5063	1778.57	114.208	1023.5	61.7172	1574.53	43.8261
	Thoc6	NM_001008425	1409.67	14.0203	1645.87	39.1334	1399.4	28.3274	1447.63	25.8654
	Ift20	NM_018854	851.133	15.7755	657.8	24.0913	1156.43	44.6842	953.633	18.6724
	Slc16a6	NM_134038	203.5	0.896289	247.1	5.16172	177.1	2.46847	227.4	17.4141
	Acaa1a	NM_130864	4938.93	266.342	4361.63	209.706	6366.83	188.051	5066.57	250.773
	Tk1	NM_009387	2371.13	118.97	3494.03	228.593	1701.8	84.522	2612.73	249.512
	4833439L19Rik	NM_133797	595.7	21.7086	542.933	6.1249	702.433	25.4625	655.267	22.0009
	Tmem160	NM_026938	1908.4	55.7	1856.5	10.4543	2261.93	34.5796	1952.2	47.486
	Dnalc1	NM_028821	203.067	3.37458	183.4	5.77264	239.533	1.79382	224.867	4.38571
	Tollip	NM_023764	2137.97	90.2128	1992.5	52.2651	2408.47	34.0809	2403.5	73.5715
	Lrwd1	NM_027891	844.7	53.1669	1150.53	70.7462	677.6	19.8243	894.8	46.115
	Zfx	NM_011768	1091.17	36.5997	1326.73	43.3956	1009.33	26.5554	1132.5	35.2696
	Arhgap19	NM_027667	143.333	2.35537	185.067	10.9423	120.967	6.04051	152.667	1.9342
	Hmg20a	NM_025812	551.767	7.9984	617.467	7.0702	512.933	10.6468	621.833	28.129
	Smg7	NM_001005507	1790.33	31.0789	1712.53	28.463	2045.1	39.2491	1920.33	72.591
	C1rl	NM_181344	130.233	1.40515	126	4.66083	148	2.85715	138.9	2.8589
	2012-09-02	NM_010891	14359.2	724.625	12337.7	608.471	16838	291.473	16665	782.584
	Nipa2	NM_023647	783.533	14.0753	630.133	31.8907	964.9	69.2728	925.333	33.5987
	Prex2	NM_001033636	179.133	2.69959	185.3	2.89194	173.5	5.75529	208.967	1.29914
	Nsl1	NM_198654	174.133	1.91514	195.3	6.67258	163.167	2.70329	193.933	3.25184
	Tfpt	NM_023524	831.4	27.789	753.367	33.5725	997.133	17.0531	890.833	31.3925
	B4galt7	NM_146045	352.133	10.5698	309.3	18.9945	403.733	12.2657	407.5	16.3328
	Gdi1	NM_010273	2241.33	94.1601	2039.27	66.1091	2674.27	71.7059	2399.33	54.9069
	Ssrp1	NM_182990	3957.33	78.3504	4739.17	190.673	3696.33	46.5685	4093.4	127.569
	Eif1ad	NM_027236	874.6	33.1216	1035.87	41.8902	763.7	19.2006	981.2	17.3512
	Xrcc2	NM_020570	270.967	24.5282	348.933	4.4307	223.567	8.0838	294	14.609
	-	NR_000040	1807.77	53.6838	2375.47	87.085	1463.63	77.7222	1955.63	98.1119
	Pnkp	NM_021549	1136.67	24.4847	1393.4	62.7788	1016.3	15.386	1195.6	25.304
	1110002N22Rik	NM_183275	421.333	8.43452	508.233	19.2059	378.633	1.84962	447.7	17.1035
	Prdx2	NM_011563	13185.7	604.376	12218.3	354.55	16220.5	584.314	13204.8	426.496
	Ern2	NM_012016	124.7	2.70247	120.033	2.23632	137.833	0.825295	135.267	2.54646
	AI467606	NM_178901	765.367	20.7464	929.8	36.9746	688.433	3.10501	801.967	43.0399
	Cbx1	NM_007622	212.667	6.14121	200.267	3.2323	226.3	8.10699	244.033	5.15148
	Reg3d	NM_013893	90.6667	0.874325	87.6333	1.71885	104.6	1.07858	93.1667	1.96497
	4931440F15Rik	NM_176829	123.167	2.70883	142.2	3.57631	118.7	1.249	126.767	2.7552
	Hmgcl	NM_008254	664.467	15.0415	586.5	9.2738	828.767	18.4393	684.167	32.0344
	Gtf3c2	NM_027901	2722.03	94.9614	3274.9	119.979	2331.47	64.8461	3010	49.8244
	Gldc	NM_138595	112.433	1.90992	130.367	1.94022	112.633	2.21911	110.167	0.926163
	Lamp1	NM_010684	8846.33	88.4131	7925.1	97.4551	10593.5	429.319	9359.37	345.699
	Nedd1	NM_008682	928.767	27.9252	1144.6	57.0083	772.833	43.9171	1029.47	38.1054
	Xrcc2	NM_020570	227.3	11.4771	288.8	18.3533	194.1	10.9345	235.5	6.03075
	9530077C05Rik	NM_026739	164.2	7.30023	197.533	5.59534	153.467	5.6881	164.533	4.76876
	Pja2	NM_144859	3389.13	40.881	3046.17	42.1753	4162.53	173.73	3450.43	39.2218
	Gpr84	NM_030720	108.567	2.54318	100.8	0.750555	122.8	2.77909	117.067	3.43527
	Vrk1	NM_001029843	377.167	2.30531	440.533	18.5681	322.8	8.0575	425.833	19.3868
	Furin	NM_011046	4601.17	200.267	3887.43	126.615	5572.17	129.607	5059.73	231.488
	Zeb2	NM_015753	354.467	12.5335	251.167	14.7362	500.2	6.87386	399.433	38.5749
	Aldh2	NM_009656	12315	372.478	11017.4	284.409	14970.8	544.853	12635.5	801.988
	Noc4l	NM_153570	1311.83	29.5028	1553.9	71.9881	1195.43	11.9199	1359.7	25.1291
	Ythdf1	NM_173761	3053.67	14.6498	3285.73	102.543	2917.6	25.3563	3339.1	59.2666
	Olfr341	NM_146950	107.567	0.033333	119.633	3.12908	103.867	1.58149	112.5	1.55671
	-	NM_030015	555.767	13.2911	464.433	16.5692	668.533	36.3567	618.633	26.4919
	Tmem138	NM_028411	302.8	18.0935	362.867	20.7681	252.7	5.22717	338.8	13.7022
	Tpi1	NM_009415	19160.2	198.567	17710.9	549.555	21095.5	634.249	21051.8	175.791
	Exosc4	NM_175399	1568.97	27.761	1721.33	36.0352	1439.27	47.3424	1741.9	53.2754
	Hist1h3g	NM_145073	246.7	3.8371	278.267	0.726483	225.9	5.40771	266.5	8.40714
	1500011H22Rik	NM_026883	1627.23	84.1339	2064.9	4.97427	1367.83	72.1583	1677.57	30.976
	Cbfb	NM_022309	7024.1	397.761	6175.93	223.214	8118.7	159.456	7664.83	90.9066
	Riok3	NM_024182	3573.33	169.156	2924.5	152.322	4254.23	167.393	4076.53	211.097
	Supt5h	NM_013676	1315.43	6.2336	1203.97	35.176	1531.63	52.8638	1361.93	41.8331
	Dctn4	NM_026302	539.667	27.6783	456.367	6.86934	679.467	8.96741	556.1	25.329
	Fbxw8	NM_172721	767.6	23.7462	696.2	20.6459	908.933	15.0617	786.667	12.6676
	Psme4	NM_134013	4827.23	257.233	4458.9	7.20278	5568.73	106.264	4981.2	116.685
	Triap1	NM_026933	1031.1	34.0453	932.867	33.1979	1077.3	17.895	1198.13	23.0219
	Slc2a1	NM_011400	4571.53	140.936	3898.23	113.673	5353.93	124.968	5033.97	264.586
	Ndel1	NM_023668	2112.57	21.1599	1831.1	56.3193	2506	64.9341	2253.53	12.6426
	Hdac2	NM_008229	6049.93	160.845	5139	320.947	7298.8	360.859	6473.8	271.891
	BC066028	NM_001001180	138.167	3.13174	131.967	0.96148	154.2	4.2548	142	1.45258
	4930519N13Rik	NM_207204	439.7	28.5606	365.433	29.4241	569.9	28.8168	440.067	2.30675
	Sh3bgrl2	NM_172507	383.533	17.8297	343.167	13.1697	405.967	13.635	441.167	6.36693
	Kctd5	NM_027008	3837.87	116.666	3378.6	150.309	4478	11.5518	4053.47	180.228
	Pole	NM_011132	912.367	19.3822	1123.63	52.7478	733.7	33.7249	1001.5	38.9947
	6230416J20Rik	NM_173400	1302.33	18.2266	1479.23	47.3895	1094.33	55.5603	1484.6	85.0736
	Elf2	NM_023502	225.7	8.39186	205.733	7.11087	261.967	5.26793	230.433	8.04515
	2610024G14Rik	NM_019836	1703.5	60.3931	1509.7	55.2527	1916.57	30.6431	1852.67	52.0276
	Zfp329	NM_026046	119.167	0.924362	128.1	2.07846	125.033	0.845248	114.567	0.417665
	Prkaa2	NM_178143	108.1	1.5695	106.133	2.71375	118.433	1.28106	108.333	1.11405
	C230094A16Rik	NM_146016	102.633	2.65665	115.167	1.08372	103.833	3.51679	97.2667	1.16237
	Slc9a3r2	NM_023055	482.4	17.468	373.733	29.5987	603.2	24.3011	539.467	7.8893
	Rap2c	NM_172413	2117.33	67.6432	1874.33	67.1709	2439.63	65.4737	2229.17	40.1682
	Rpl7l1	NM_025433	3338.87	38.135	3671.17	48.4032	3109.23	88.5117	3502.1	61.5931
	Cenph	NM_021886	901.267	81.4805	1271.93	106.479	662.067	50.0944	923.333	30.4336
	Olfr571	NM_147085	130.433	1.7901	137.833	2.11371	119.667	2.67104	143.933	5.0762
	Tesk1	NM_011571	789.2	20.7331	654.067	49.1157	1000.8	29.3722	793.933	31.7244
	Ints12	NM_027927	961.6	31.4248	1154.3	58.4262	823.333	41.2735	993	9.40071
	Alg8	NM_199035	461.633	11.1947	551.733	6.58846	401.067	16.9683	470.233	1.26667
	Adamts1	NM_009621	311.2	32.1016	204.833	3.36171	474.933	3.64478	328.2	10.9546
	Brca2	NM_001081001	154	3.80175	175	5.31445	140.567	5.4272	157.1	3.38575
	Epc2	NM_172663	2080.5	18.8407	2482.7	105.404	1795.73	47.8029	2133.33	81.3782
	H2afz	NM_016750	22095.4	745.612	25429.8	1319.59	18069.7	1057.06	24931.2	880.103
	Pppde2	NM_134095	1221.9	38.9405	1067.23	40.1147	1427	21.3226	1261.83	20.3103
	Triobp	NM_138579	5904.63	197.446	6846.83	72.6582	5000.27	226.085	6352.8	26.6991
	Noc4l	NM_153570	790.4	17.0694	945.367	21.3331	670.833	6.01618	818.667	7.54019
	2810417H13Rik	NM_026515	423.333	9.32958	495.5	28.3373	339.167	15.2215	477.833	28.0185
	Plekhg3	NM_153804	390.433	17.4236	485.367	12.4756	317.1	18.3468	405.567	19.123
	-	NM_153168	1008.77	25.5732	1221.53	45.7227	862.633	12.2529	1015.9	28.8703
	Itm2b	NM_008410	15142.1	651.837	13404.1	162.751	17244.7	304.554	15735.5	571.484
	Mtbp	NM_134092	1387.8	52.0039	1664.8	74.5719	1065.63	33.6754	1597.03	55.5548
	Ccs	NM_016892	2031.37	64.3728	1710.73	21.0957	2361.9	106.831	2173.3	80.5645
	Recql4	NM_058214	295.067	28.2745	378	10.0779	232.1	6.90097	304.767	4.48491
	-	NM_011368	12106.2	147.156	10990.1	181.934	13827.2	266.096	12115.7	257.076
	Pld3	NM_011116	1035.07	84.4962	862.067	13.9798	1276.13	44.456	1043.4	34.4022
	Mfsd6	NM_178081	100.1	4.10731	111.933	2.29807	103.933	1.70229	89.2667	2.45244
	Cbln3	NM_019820	100.267	2.88116	107.067	0.491031	105.567	2.43059	92.3333	0.808977
	Fntb	NM_145927	2196.7	101.044	2528.43	65.9062	1949.7	31.0864	2217.13	21.3392
	Fut10	NM_134161	435.767	15.4687	558.067	11.348	335.133	23.0207	458.667	26.6356
	Cbfb	NM_022309	6705.7	319.237	5867.87	41.9528	7518.8	226.5	7056.5	122.961
	Mapk1ip1l	NM_178684	1420.87	85.54	1089.73	77.3926	1774	97.3701	1541.73	90.3504
	Thoc4	NM_011568	8874.3	155.954	10123.8	130.133	7645.17	339.794	9297.27	110.751
	Rad50	NM_009012	1010.2	17.1343	1235.9	6.07152	822.333	24.1312	1037	27.5582
	1110032A13Rik	NM_199197	1071	32.4827	924.833	37.6741	1243.5	32.4294	1086.73	47.8375
	Rnf11	NM_013876	3111.43	18.8405	2446.8	74.8826	3823.43	81.2845	3279.83	108.372
	Tmem97	NM_133706	2707.83	99.1971	3296.23	57.3604	2069.47	44.266	2982.47	115.164
	Tctn2	NM_026486	359.3	9.82446	308.6	1.81475	420.4	10.3929	359.533	3.94729
	Tyms	NM_021288	2786.67	122.056	3572.1	97.8627	2097.23	111.353	2929.2	173.203
	Rb1	NM_009029	204.767	6.57301	173.3	0.793725	229.8	1.53731	217.667	8.70523
	Inadl	NM_172696	124.9	3.57631	110	2.05507	127.8	4.63609	138.733	3.30471
	Dtx2	NM_023742	181.5	1.85023	205.867	3.05523	155.7	6.60908	186.633	2.51153
	Reep1	NM_178608	601.267	50.3079	453.8	28.1177	765.533	22.0987	627.767	23.835
	-	XM_148465	376.067	34.5815	462.467	5.05184	298.833	16.084	383.9	7.13372
	-	XM_132806	4557.57	182.311	5534.5	205.28	3618.6	76.5463	4724.27	99.7438
	Ddx52	NM_030096	2297.93	94.3978	2557.43	75.9961	1986.53	70.0955	2351.3	51.734
	Coil	NM_016706	363.267	8.33013	406.633	2.46329	317.233	5.34925	363.8	10.4078
	Tyms	NM_021288	893.867	26.2283	1130.93	43.2235	669.367	29.4261	933.767	46.2244
	Mrpl51	NM_025595	294.767	6.71127	335.933	4.64627	251.333	2.19418	296.633	5.09324
	Grwd1	NM_153419	671.167	47.9933	791	44.4471	519.767	13.8099	728	30.2596
	Ilkap	NM_023343	1903.77	48.1094	1655.6	65.4316	2111.57	18.0015	1926.9	67.583
	-	XM_355238	2478	172.021	2893.2	10.1569	2028.5	132.431	2539.63	57.8115
	Dclre1b	NM_133865	161.333	5.18534	177.633	3.56573	138.567	5.54747	166.467	0.233333
	Ift20	NM_018854	1543	129.187	1206.87	55.7829	1893.57	64.4168	1567	14.7704
	H2afx	NM_010436	2986.83	209.049	7026.13	113.731	1222.17	68.2675	3144.13	41.1886
	Slc25a10	NM_013770	661.9	49.6958	811.433	16.9839	517.967	11.4706	669.5	26.6986
	Lrrc49	NM_145616	741.133	34.5664	943.233	48.3152	549.167	18.5517	767.4	41.7216
	Triobp	NM_138579	7213.73	309.344	8231.83	105.56	6077.3	77.0208	7238.93	221.301
	Ankrd54	NM_144849	314.633	13.2984	357.333	13.4512	263.567	4.27291	319.4	3.89743
	Flrt3	NM_178382	4013.9	186.678	2818.5	63.9847	5277.67	19.5322	4236.63	244.206
	Eftud2	NM_011431	1537.47	53.9669	1681.63	22.8181	1327.93	57.3074	1542.83	14.4631
	Lrrc49	NM_145616	266.967	18.2521	330.833	17.0206	201.633	0.98714	272.7	3.8553
	Syap1	NM_025932	712.867	5.02472	613.2	22.1545	758.8	15.9412	736.833	26.3243
	Ccdc82	NM_025534	189.9	2.02073	152.433	6.96571	209.467	10.2245	204.467	6.08559
	Rnf11	NM_013876	2502.27	146.895	1900.73	8.54329	2914.33	219.558	2709.53	75.065
	Mex3c	NM_001039214	162.7	0.763763	134.533	3.74893	169.333	6.96619	177.4	1.0116
	Ncaph2	NM_025795	962.633	57.4188	1098.47	4.11191	771.167	14.4487	982.6	29.98
	Zfp184	NM_183014	348	7.70779	300.7	11.2641	359.7	6.97209	359	9.04562
	Mcm10	NM_027290	413	23.9853	512.4	13.9524	302.867	14.0119	419.967	7.6823
	Urm1	NM_026615	554.733	4.04654	445.367	5.43885	611.2	18.6153	565.733	20.6435
	Ttf2	NM_001013026	1008.87	22.2873	1271	27.7627	692.767	24.8902	1064.83	45.9612
	2610020H08Rik	NM_001004187	184.267	7.8893	207.2	7.37292	140.8	3.46458	192.033	9.83198
	Kctd10	NM_026145	3153.7	103.115	2543.87	136.718	3450.23	94.7666	3156.4	129.202
	Tssc4	NM_138631	599.6	17.8259	493.567	14.0919	631.9	24.3666	603.9	15.52
	Rbm39	NM_133242	590.6	17.3371	602.867	15.6666	488.5	23.0665	607	4.25245
	Cd248	NM_054042	788.467	69.1111	636.467	75.2827	1327.67	134.36	771.067	59.1482
	-	XM_129987	205.733	13.3678	179.3	5.9079	297.833	29.5452	197.967	4.14501
	Six1	NM_009189	3918.83	195.786	5485.8	292.735	3343.2	209.22	3860.83	259.834
	Mtss1l	NM_198625	144.767	6.76864	144.433	3.74893	184.5	3.35012	136.633	6.78339
	Tbc1d22a	NM_145476	1870.9	82.9341	2229.53	8.87061	1772.33	13.3946	1828.53	64.35
	Mep1b	NM_008586	142.967	8.11364	135.7	4.89524	133.633	5.69571	176.233	6.02504
	1700020D05Rik	NM_023781	127.5	2.42487	121.4	5.19711	153.5	5.77437	121.333	4.86393
	2610305D13Rik	NM_145078	126.8	0.665833	125.467	3.48441	125.833	1.94279	141.967	0.611919
	Ccdc108	NM_001039495	114.8	2.35797	127.767	1.88001	114	1.00664	113.6	2.80416
	Clip4	NM_030179	283.833	15.4528	247.7	9.95339	366.733	15.0282	269.6	11.2787
	Tmem2	NM_031997	919.967	22.4161	698.033	62.4344	1311.2	87.9339	899.067	10.8812
	Kdm5d	NM_011419	206.5	16.3231	257.3	1.32035	177.2	6.96012	206.267	10.9837
	-	NR_003107	427.6	14.8758	543.367	13.4051	366.033	4.63765	416.767	13.8316
	Tef	NM_017376	863.6	81.7304	758.8	8.50647	1077.7	11.5725	833.633	29.0146
	Bahcc1	NM_198423	772.533	40.4134	935.667	22.8544	723.533	32.0496	718.5	3.19531
	Lrpap1	NM_013587	1408.1	27.246	1280.7	26.3143	1694.4	44.4444	1359.37	13.1497
	Nrf1	NM_010938	888.733	19.8345	1020.97	31.0897	841.267	35.1311	862.567	5.78686
	Vat1	NM_012037	910	34.0554	788.267	8.4582	1122.1	34.6425	893.267	20.1334
	9530002B09Rik	NM_023865	93.0667	1.12596	104.967	3.46041	89.6	1.8735	90	2.30724
	Gnao1	NM_010308	317.867	9.65994	274.767	9.98337	384.5	4.88092	317.8	9.09634
	Slc16a4	NM_146136	273.067	8.42404	162.733	2.43607	472.833	35.7477	270.033	10.8936
	Rgs10	NM_026418	820.967	64.3525	622.4	66.7721	1172.67	43.6836	769.2	35.0651
	Tsen2	NM_199033	762.033	51.1822	994.733	56.3241	635.867	34.304	715.467	18.3012
	Entpd3	NM_178676	137.367	2.98068	154.2	2.95127	132.067	1.39204	130.967	3.19705
	Tas2r109	NM_207017	96.9	1.4	106.267	0.990511	91.8667	2.47813	95.3	2.00333
	Oplah	NM_153122	237.6	8.0206	209.6	13.1571	281.767	9.51846	230.7	8.00333
	Cnnm2	NM_033569	671.5	30.2179	597.1	18.7561	788.967	20.2776	650.567	14.6936
	Rnf31	NM_194346	233.133	4.26471	271.967	7.64947	213.367	4.63117	220.5	10.8583
	Dguok	NM_013764	1083.97	35.4449	1224.03	29.4415	980.9	34.8104	1075.33	25.7717
	Six5	NM_011383	192.9	5.25389	167.967	7.43871	227.233	7.26873	189.7	3.82143
	-	XM_132348	982.4	57.9088	1422.87	100.766	689.133	8.77579	971.033	77.8787
	Srd5a1	NM_175283	317.333	21.9364	431.2	15.9352	245.2	8.45064	300.1	2.96704
	Lgmn	NM_011175	3558.13	195.348	3025.83	162.164	4210.13	157.203	3549.6	99.5017
	Tmem2	NM_031997	1319.67	158.491	1028.57	71.968	1753.53	36.4903	1267.63	39.9962
	Msi2	NM_054043	981.2	31.8412	835.867	11.5773	1159.37	18.5966	976.067	54.8725
	Olfr1181	NM_001011816	117.933	1.3691	114.2	3.11929	110.367	1.32958	130.067	2.99462
	Erp29	NM_026129	7042.6	332.485	6159.23	195.202	8193.1	178.131	6903.77	69.98
	Mtmr1	NM_016985	221.3	4.91528	243.6	4.21584	200.933	4.13333	221.233	3.08455
	Slc17a5	NM_172773	180.033	2.71191	196.967	4.87522	174.267	3.15401	169.367	3.13174
	Ak3	NM_021299	1457.13	42.1531	1172.77	60.043	1894.23	88.2768	1370.6	82.4626
	Olfr812	NM_146795	111.267	1.86667	120.833	0.868588	110.333	2.71437	102.3	3.5171
	Prpf31	NM_027328	152.067	3.44206	140.333	1.91949	165	3.45977	149.867	3.32382
	Mrps16	NM_025440	2138.77	72.4242	2473.97	85.6051	1907.73	102.81	2034.73	42.1754
	Agap2	NM_001033263	120.767	0.898765	115.633	1.96497	118.467	0.371184	126.2	1.00167
	Agxt2l2	NM_028398	552.167	11.2673	499.3	32.6229	645.2	15.6981	510.1	15.1414
	Dcps	NM_027030	1756.2	76.2982	2091.97	40.6087	1461.03	103.147	1735.77	42.7798
	-	XM_126658	599.467	8.57367	704.9	24.2761	536.667	18.0667	552.933	14.6317
	Mtmr14	NM_026849	2735.4	85.1205	3477.13	171.193	2248.1	51.1264	2529.43	35.3054
	Mettl2	NM_172567	1392.47	52.0155	1616.43	31.8342	1216.93	47.321	1329.87	16.898
	Rfx2	NM_009056	202.167	6.19928	235.033	9.60492	175.633	5.37784	193.733	6.89573
	Copa	NM_009938	3038.33	61.7706	2523.47	38.3126	3569.47	106.902	3010.9	35.1125
	Smarcd2	NM_031878	2069.17	72.3372	1721.57	70.4417	2429.4	71.9438	2046.5	64.7929
	Mipep	NM_027436	1115.67	33.251	1288.53	28.9105	947.8	45.1683	1094.33	39.2269
	-	XM_135820	612.867	47.7376	461.033	56.5725	814	43.8662	588.333	34.8885
	Pax2	NM_011037	100.967	1.96158	93.6333	3.12748	108.067	0.185592	97.5667	1.32958
	Spon2	NM_133903	349.8	8.94725	270.733	25.2496	483.733	34.4592	307.867	7.51273
	Fam120b	NM_024203	410.033	8.42938	500	30.36	337.267	2.45787	390.533	21.5976
	Rnf113a1	NM_153503	235.9	4.18609	259.833	3.67076	209	5.10131	231.233	5.98786
	Tmem11	NM_173453	4795.87	58.0492	5208.93	192.717	4305.63	45.9606	4699.1	50.3298
	Flrt3	NM_178382	282.9	24.6812	210.567	2.04151	383.767	34.2006	265.7	16.3065
	Il17ra	NM_008359	140.667	5.584	156.067	3.68887	131.9	3.02379	128.367	2.27621
	-	XM_148338	577.3	28.6582	784.933	50.4183	489	56.063	466.8	22.8614
	Xkr8	NM_201368	244.833	2.34118	269.533	4.40353	225.833	9.53596	226.9	3.05505
	Odf2	NM_013615	299.967	10.6041	392.167	21.9165	224.567	7.4776	289.733	11.6071
	Pln	NM_023129	104.8	2.67644	96.7333	1.89766	101.567	0.606447	109.733	1.03976
	D15Wsu169e	NM_198420	234.8	3.17648	277.1	12.2153	192.5	4.9521	227.533	8.16993
	Gns	NM_029364	4419.17	53.6751	3933.6	83.7151	5116.97	50.0328	3995.23	82.8304
	Bscl2	NM_008144	2551.83	71.8469	2088.13	78.4236	3122.93	155.371	2375.1	19.7794
	Arhgap17	NM_144529	2084.67	104.717	1746.4	56.2562	2474.73	147.481	1948.73	60.2814
	Slc28a3	NM_022317	139.767	1.06823	130.167	0.578312	144.267	0.717248	135	3.20364
	Zfp763	NM_028543	223.4	7.94628	275.4	5.49939	169.267	19.8725	223.167	14.9061
	Sclt1	NM_001081411	198.267	7.62132	214.267	6.26108	170.333	4.38039	197.1	3.68646
	Fam155a	NM_173446	102.3	0.85049	101.033	1.96497	106.4	0.305505	91.6	1.70587
	Ttc39c	NM_028341	199.633	5.35734	174.2	3.05123	221.2	7.0713	189.833	0.983757
	Ramp3	NM_019511	127.567	2.09868	143.5	3.04138	120.267	6.50777	110.267	3.83898
	Dgat2	NM_026384	323.267	5.23906	286.9	4.95412	342.9	10.9986	314.167	7.22319
	Ryr1	NM_009109	128.933	2.20404	115.333	1.21427	138.767	2.25191	122.367	4.8841
	Tbc1d20	NM_024196	2171.53	89.0375	1712.37	91.0405	2689.43	77.6781	2034.77	30.1822
	Fgfrl1	NM_054071	303.833	21.4361	237.3	13.0944	365.7	13.0369	296.967	5.32426
	Cnksr3	NM_172546	192.4	2.38607	170.633	4.60085	215.1	8.0829	176.133	8.45426
	Slc14a1	NM_028122	137.467	3.12481	166.3	7.75973	115.767	4.35214	122.267	7.01435
	P4hb	NM_011032	10432.3	544.27	8369.6	493.31	12157.9	294.053	10202.8	246.519
	-	XM_125771	593.333	35.9949	460.8	22.9875	760.3	49.3568	539.933	14.5671
	Lpar1	NM_010336	1126.9	14.4005	1303.53	53.7228	941.733	56.181	1056.07	58.069
	Sec63	NM_153055	2023.8	69.3992	1701.37	36.253	2250.77	9.47705	1964.83	65.4172
	Tbc1d7	NM_025935	146.333	2.76546	159.767	5.37598	130.167	4.4916	136.1	3.53412
	Sptlc2	NM_011479	166.867	1.67066	178.667	3.96835	152.633	2.62953	153.567	3.36171
	Alg9	NM_133981	229.167	3.08022	259.4	4.24617	198.767	11.4112	210.067	8.33473
	Dhrs7b	NM_145428	2720.17	124.739	3479.9	84.7762	1987.8	73.0345	2653.73	154.941
	Ndufs4	NM_010887	7214.13	183.919	7696.23	180.356	6442	34.3408	6780.73	103.567
	Pard6g	NM_053117	437.067	17.5387	316.1	14.7706	562.8	34.551	426.967	15.1737
	Chek2	NM_016681	276.167	10.4509	405.733	17.1804	175.367	14.3727	272.567	11.3494
	Ppa2	NM_146141	1507.27	38.764	1772.13	25.7533	1255.03	24.8667	1374.63	66.2626
	Olfr792	NM_001011849	105.967	1.73622	109.467	0.927961	96.2667	1.16952	100.467	2.08673
	Gamt	NM_010255	406.8	10.1887	313.867	25.6335	541.5	15.273	351.367	28.6859
	1110007L15Rik	NM_026269	1621.63	45.2849	1398.87	29.0035	1776.43	32.662	1528.83	67.2224
	4933434E20Rik	NM_025762	4085.7	84.0795	4383.83	107.385	3559.17	129.732	3886.4	56.8742
	Elf2	NM_023502	530.8	20.2724	435.367	22.434	581.7	18.7513	528.467	13.7165
	Amd2	NM_007444	1052.6	20.4734	1170.8	21.7373	946.6	19.1772	932.033	43.0871
	Chek2	NM_016681	257.267	9.96232	327.1	14.1743	196.733	5.38186	235.3	18.0408
	-	NM_139237	103.467	1.21974	105.7	2.25906	90.7	1.62583	102.3	2.84488
	Elf2	NM_023502	667.9	44.0147	504.133	44.7827	811.7	26.9318	652.2	23.3252
	Cog4	NM_133973	759.833	27.3179	632.033	28.9662	862.033	41.3151	710.033	4.12526
	Acot7	NM_133348	716.433	40.3617	828.333	38.383	602	24.3006	646.667	15.799
	Nup88	NM_172394	6853.87	145.585	7187.03	99.1158	5818.87	213.931	6763.43	247.933
	Iqcc	NM_198026	188.033	5.39269	195.467	3.31126	185.067	3.9074	161.233	3.92188
	Fbxo16	NM_015795	304.467	9.08063	375.467	27.2948	233.033	12.53	284.6	11.3024
	Dolpp1	NM_020329	371.5	7.29589	414.4	5.93408	327.433	5.77764	330.4	6.46323
	Mak16	NM_026453	3120.53	104.724	3528.67	97.6137	2714.83	22.1872	2767.47	93.6898
	G3bp1	NM_013716	4128.07	1.06667	4282.33	28.7485	3710.83	149.38	3851.13	57.1189
	H6pd	NM_173371	605.067	23.67	492.667	4.81191	680.9	33.7082	577.8	29.4444
	Lrp8	NM_053073	150.333	3.27482	161.067	6.1507	132.6	3.20052	137.5	1.47986
	Ctdsp2	NM_146012	3234.2	149.24	2648.4	108.92	3712.8	120.495	2987.83	153.288
	Ublcp1	NM_024475	2585.5	78.4978	3199.8	234.797	2022.07	70.2132	2314.47	156.076
	Sgms1	NM_144792	764.267	53.0672	556.067	25.8458	961.233	39.2215	733.367	26.7196
	Acot7	NM_133348	917.933	14.643	1007.73	25.4489	753.3	25.1003	882.967	18.5217
	Thsd4	NM_172444	377.967	20.7979	447.433	16.8785	310	25.8798	335.033	8.92381
	Spnb2	NM_009260	1015.43	16.2782	846.5	58.7326	1175.27	56.5638	903.367	14.1634
	-	NM_020295	129.467	1.52133	155.833	7.21257	104.333	3.91975	114.267	5.393
	Prpf3	NM_027541	4180.5	69.5733	4702.37	120.109	3410.07	174.588	3901.57	28.343
	Dhrs7b	NM_145428	619.267	14.1958	759.733	37.9185	466.767	11.7787	576.533	32.0578
	Eif4a1	NM_144958	9306.47	286.016	10321.4	197.063	7859.63	101.626	8465.03	315.009
	-	XM_126427	343.733	12.8546	278.867	10.4716	366.3	16.3441	341.1	6.7656
	Snn	NM_009223	4006	399.029	2829.63	82.4044	4982.23	292.276	3989.37	127.209
	Dnmbp	NM_028029	156.467	3.41874	158	1.7673	143.367	2.53136	142.5	0.896289
	Grlf1	NM_172739	748.367	15.4994	640.733	39.8751	844.033	20.4672	654.933	34.4978
	Lbr	NM_133815	4926.2	372.816	5764.03	238.042	3835.63	97.3578	4605.77	86.356
	Ints5	NM_176843	1017	13.9371	1103.4	57.5225	808.5	30.715	1005.93	35.3259
	Iars	NM_172015	161.9	7.05006	170.733	5.03002	135.533	3.6997	154.8	2.16564
	Carhsp1	NM_025821	1870.93	75.7445	1400.77	67.2323	2201.23	72.0271	1811.67	108.468
	Adcy6	NM_007405	763.633	74.1708	565.233	48.6992	936.767	17.3453	714.933	30.3662
	Jmjd5	NM_029842	420.767	12.9474	476.067	21.0661	355.3	21.2665	368.167	6.12599
	Ramp3	NM_019511	152.433	7.99674	177.233	5.47246	126.033	0.933333	132.4	5.31256
	Sptlc1	NM_009269	2518.57	79.1591	2841.57	65.3415	2097.37	47.0786	2234.83	71.2825
	Mtx1	NM_013604	1054.87	39.5851	1180.67	39.6335	867.533	18.4776	955.667	50.9118
	Slc5a3	NM_080456	8681.63	255.479	10612.5	238.779	7120.17	437.733	7212.83	194.995
	Fam131a	NM_133778	237.9	4.98029	198.433	2.08513	266.833	12.1229	211.4	3.55715
	Gprin1	NM_012014	617.3	33.0854	443.367	5.2853	789.3	20.6284	565.7	38.4028
	Tmem59	NM_029565	2382.9	112.864	2028.73	52.9244	2593.4	31.184	2129.8	27.0113
	Dcps	NM_027030	794.1	22.0303	928.433	32.6204	648.9	5.469	689.6	19.1844
	Decr1	NM_026172	176.033	0.523874	167.333	4.34371	176.533	3.15929	152.033	2.71559
	Clpx	NM_011802	340	15.7535	360.433	5.39269	285.033	7.46332	316.367	4.07117
	Vmn2r81	NM_175936	134.733	1.83515	125.2	2.59294	136.567	0.751295	117.633	2.84976
	Vangl2	NM_033509	745.767	72.6804	512.233	17.5771	1006.87	57.1249	676.4	63.0158
	Gzme	NM_010372	203.8	2.30651	227.733	9.94055	182.067	5.25748	168.867	3.25184
	Nkx2-5	NM_008700	1209.67	51.1977	1415.63	89.1065	973.2	15.3709	1057.7	37.2403
	Rpa3	NM_026632	4940.27	252.769	5686.97	199.657	3800.5	193.28	4602.9	138.962
	Rwdd1	NM_025614	348.3	10.8503	369.667	13.9337	285.067	5.86184	327.567	12.1672
	Abhd14b	NM_029631	1057.17	38.8263	797	52.9317	1224.57	31.798	1000.5	71.5218
	Fam110c	NM_027828	147.533	6.77602	160.1	5.62968	130.967	2.87537	124.533	3.83377
	2410022L05Rik	NM_025556	874.933	27.8737	729.333	9.20966	946.167	18.8865	789.133	29.0196
	Pfn2	NM_019410	679.567	52.9546	537.933	16.8626	798.6	22.6169	596.667	18.3639
	Zfp467	NM_020589	429.3	15.8973	352.233	21.0917	504.133	17.2327	361.833	5.54417
	Dusp11	NM_028099	3186.47	31.1161	3801.47	113.937	2466.7	55.0051	2813.2	23.1314
	Als2cr4	NM_001037812	1214.07	23.9726	1317.33	49.6672	968.5	35.8984	1141.67	15.1004
	Stk39	NM_016866	200.167	2.60278	219.133	1.29914	160.367	2.85793	185.2	5.34072
	Smarcal1	NM_018817	809.867	51.174	922.533	17.3037	639.367	15.2597	729.367	24.4056
	Rnasen	NM_026799	2079.97	9.66253	2128.47	28.4824	1757.83	70.2865	1924.1	62.2244
	Hk2	NM_013820	4275.03	441.516	2945.5	191.702	5204.2	48.7057	4241.53	211.454
	1810009O10Rik	NM_197989	1423.63	46.6709	1525.6	22.7921	1139.77	18.1108	1330.87	31.0905
	Bnip3l	NM_009761	2696.47	140.065	2151.6	120.873	3126.9	101.294	2336.1	24.7574
	Slc39a11	NM_027216	1161.57	38.1833	1289.07	22.6781	946.967	26.1672	1026.27	20.506
	Pear1	NM_028460	164.333	5.93867	172.5	5.87906	149.4	1.72143	137.067	2.89501
	Iars	NM_172015	5687.2	212.953	6267.53	131.905	4308.3	130.859	5510.47	114.063
	Iars	NM_172015	8502.13	296.497	8924.2	204.402	6777.1	382.053	8113.77	202.725
	Tssc1	NM_201357	372.8	9.45992	404.2	1.22202	326.7	13.7438	311.233	2.1881
	Keap1	NM_016679	1903.1	76.8635	2193.57	111.429	1574.87	81.768	1586	65.9952
	Anpep	NM_008486	158.6	0.7	130.9	3.29596	170.7	4.0129	141.1	4.55302
	Slc7a4	NM_144852	251.333	3.78432	194.367	7.27194	312.967	7.6486	207.1	9.73362
	Tmem57	NM_025382	1646.37	44.4865	1185.2	36.3765	1908.57	5.26128	1592.3	101.391
	Wnt7b	NM_009528	152.133	3.91847	157.133	3.7547	132.133	1.64958	132.667	4.12566
	Sema3f	NM_011349	877.367	81.6092	553.167	47.7601	1192.7	105.946	843.367	89.9817
	Nfatc1	NM_198429	255.833	1.61795	272.9	8.00687	230.033	10.5142	209.067	6.6273
	-	XM_133123	28607.4	753.956	28779.1	388.201	25716.2	289.181	24600.9	278.802
	Slc35c2	NM_144893	656	13.2254	689.667	24.2729	575.1	5.57494	555.833	12.3598
	Trappc9	NM_029640	414.967	17.3114	443.7	14.4015	338.1	10.2666	373.333	9.89046
	Dctpp1	NM_023203	3030.53	23.73	3191.13	75.1605	2485.83	51.9778	2745.07	66.1789
	-	XM_132806	1147.7	83.6108	1364.47	63.9051	827.9	30.496	1069.63	31.9302
	Slco1a5	NM_130861	191.167	8.25638	199.167	3.94011	154.867	5.68341	177.267	6.49419
	-	NR_002702	19334	286.62	19573	433.719	16883.9	217.213	16979.9	488.042
	Sap130	NM_172965	1784.6	72.4429	1963.07	61.674	1459.3	17.6908	1553.83	67.3901
	Limd2	NM_172397	313	2.32594	278.867	7.31672	322.6	14.3977	265.1	5.9808
	Abcd1	NM_007435	206.1	2.25019	169.767	5.84732	209.167	0.417665	191.833	4.03911
	Arhgap27	NM_133715	150.4	5.45008	158.367	7.73657	121.633	3.43382	137.667	1.2252
	Men1	NM_008583	1061.87	47.9681	1131.63	31.3374	865.6	20.3574	950.867	41.0555
	Gm527	NM_001025605	243.233	1.53768	249.9	11.0259	217.1	0.907377	205.2	4.98631
	Sil1	NM_030749	297.467	7.92156	348.1	9.50018	227.033	8.36707	261.233	5.43026
	Smek2	NM_134034	2649.87	78.9186	3017.6	78.7998	2097.97	121.349	2293.87	110.937
	Phka1	NM_012031	270.4	4.33128	273.4	2.65393	237	6.19919	234.733	6.32833
	Prodh	NM_011172	168.333	6.98435	183.267	7.47046	144.6	6.67108	139.233	3.69203
	Pxmp3	NM_008994	2207.57	48.6575	1774.47	22.5324	2408.3	110.305	1951.07	34.8073
	Baalc	NM_080640	253.167	10.2115	280.267	15.6857	197.033	4.26628	228.633	4.23058
	Thoc4	NM_011568	6006.33	256.245	6632.43	186.607	4556.03	160.816	5607.67	79.1642
	Fmnl3	NM_011711	2624.23	91.2697	2100.93	73.2838	2865.73	109.852	2314.4	48.9659
	Rnf141	NM_025999	209.967	5.18148	225.467	7.99694	164.933	11.9942	192.167	2.76727
	Tmem42	NM_025339	386.9	9.93529	318	9.34077	406.1	14.6738	342.867	14.6731
	5730419I09Rik	NM_029081	124.533	3.90057	132.9	6.56836	103.233	0.895048	107.667	4.62829
	Nckipsd	NM_030729	296.3	6.08276	266.2	2.48261	298	6.99738	249.167	7.41672
	Mknk2	NM_021462	1950.17	48.9119	1582.9	38.1146	2098.7	15.5513	1707.6	27.2138
	Cmtm8	NM_027294	164.567	7.02242	153.467	2.50954	170.5	5.01232	130.367	4.39103
	Mre11a	NM_018736	1409.57	28.4702	1489.13	56.6773	1110.87	32.084	1296.53	31.9611
	Ndufs4	NM_010887	6687.8	109.841	6785.53	92.7598	5610.1	245.395	5957.8	71.4794
	Mical1	NM_138315	285.7	2.92632	251.133	14.353	305.4	6.87047	231.733	5.0416
	Hint1	NM_008248	11103.9	346.448	11735.5	175.029	8834.8	569.316	10078.7	340.528
	1500001M20Rik	NM_026894	1850.43	58.2078	2067.7	152.929	1338.7	30.8002	1782.07	64.7931
	Nhp2	NM_026631	6055.33	353.248	6803.97	107.388	4647.57	30.3325	5382.17	246.244
	Nup160	NM_021512	2936.17	32.784	3728.63	134.354	1919.27	114.306	2786.23	159.142
	Slc44a1	NM_133891	215.6	6.21798	221.233	4.63333	185.467	3.71184	183.067	6.83138
	-	XM_485055	404.967	10.8728	411.967	5.32051	353.133	6.96092	340.8	11.0503
	Rad17	NM_001044371	1335.97	23.9125	1494.4	60.8783	1061.93	25.1001	1132.47	33.1229
	Zswim1	NM_028028	660.9	7.40698	721.9	27.9933	550.1	38.7276	544.467	5.65459
	Med29	NM_026042	161.633	2.31397	161.733	1.31318	145.267	4.45434	133.367	4.87214
	Prune	NM_173347	298.567	9.74343	309.067	9.57572	242.6	9.25851	263.467	9.79291
	Ilf3	NM_010561	3315.97	205.068	3492.17	48.2856	2675.83	62.4876	2899.07	61.4062
	Slc14a1	NM_028122	162.267	0.338296	192.6	8.29478	121.7	3.64737	137.1	6.61236
	Cstf3	NM_177253	1895.67	54.6325	1589	4.64866	1914.23	60.6306	1649.77	69.1117
	-	NM_183120	220.967	12.8883	272.033	14.8442	159.9	6.65307	187	5.94755
	Plac9	NM_207229	213.567	3.68887	234.167	5.79665	169.867	4.08262	182.1	6.30423
	Abcb10	NM_019552	328.167	12.5555	265.533	14.7243	354.267	9.32208	278.6	2.25019
	Cbx7	NM_144811	325.333	24.7972	421.3	28.9801	220.333	8.59076	282.233	24.664
	Ccnd1	NM_007631	15744.8	279.486	16359.9	94.9563	13089.8	787.865	13397.1	579.641
	-	XM_355134	244.033	5.44681	283.533	10.4939	199.167	10.8668	190.767	5.29916
	Nkrf	NM_029891	212.567	7.15177	220.667	3.89416	177.5	8.73232	179.4	7.64286
	Tspan17	NM_028841	1194.9	53.128	966.633	17.7306	1334.5	51.9605	972.533	35.7693
	Pex13	NM_023651	211.733	8.26041	214.967	6.66942	167.967	1.61898	191.933	6.62177
	Sergef	NM_013789	297.467	11.8054	342.8	25.8261	227.2	13.4942	249.233	7.1669
	Psmg1	NM_019537	1088.47	21.0707	1129	9.48701	901.367	62.8874	920.867	5.14144
	Tmed10	NM_026775	2839.93	122.084	3115.9	139.051	2238.4	51.5931	2402.57	117.905
	Tk1	NM_009387	558	24.1123	646.767	11.7702	383.233	9.16012	527.133	23.7415
	Gemin4	NM_177367	2124.6	91.6436	2303.73	40.6305	1664.63	45.3121	1823.97	75.1537
	Lyar	NM_025281	2456	159.689	2618.1	97.7718	1926.67	33.8354	2137.37	31.5556
	1600012H06Rik	NM_026451	621.5	10.4083	667.567	14.5057	504.267	6.48597	517.867	13.8744
	Ccnd1	NM_007631	6605.73	165.017	7136.37	348.671	4936.17	49.6434	5994	439.364
	Cct4	NM_009837	11382.1	291.302	12235.1	248.624	9031.5	381.759	9681.97	432.786
	Diablo	NM_023232	1247.73	38.939	1497.1	30.8735	954.833	10.9155	993.767	8.12616
	Grk6	NM_001038018	519.6	35.8539	579.867	13.6548	366.7	11.5678	488.033	26.5823
	1110018J18Rik	NM_025370	192.967	4.60953	210.667	9.61411	157.933	8.07658	156.133	7.83291
	Mtf2	NM_013827	451.1	21.1557	516.7	35.1848	344.067	8.27392	375.167	12.8388
	Grwd1	NM_153419	1590.77	6.1031	1723	36.5251	1137	16.398	1511.47	72.873
	Lmna	NM_001002011	13352.6	448.231	13903.8	410.173	10914.4	554.757	11159.6	331.709
	Pank4	NM_172990	1004.67	58.1703	1046.07	30.5375	809.133	17.288	852.733	19.3703
	Fbxl4	NM_172988	294.833	11.6559	240.467	4.33295	305.933	11.5021	246.833	10.8593
	Galnt12	NM_172693	161.5	5.85178	163.467	4.35597	137.1	4.4238	132.567	4.99411
	Ccnd1	NM_007631	11897.5	419.681	12648.4	371.741	9283.5	207.5	10147.4	583.154
	Zkscan6	NM_026107	558.133	22.2861	634.367	45.4959	448.533	11.484	434.4	11.2305
	AI662250	NM_178926	274.6	12.2572	229.133	3.24465	282.233	2.82627	224.6	4.96421
	Gldc	NM_138595	184.1	2.76466	192.233	2.53004	153.167	11.8404	148.933	4.90793
	Mrpl4	NM_023167	1041.1	58.2866	1133.3	51.1336	789.567	36.9712	894.367	15.1267
	Tex10	NM_172304	671.1	9.01499	710	32.5781	537.9	10.2919	554.733	15.3896
	Mtx1	NM_013604	7149.97	127.719	7723.4	485.357	5455.27	116.687	6103.47	256.671
	Pop5	NM_026398	1968.77	36.2308	1998.03	19.0377	1592.8	115.644	1666.2	55.7048
	Tmem2	NM_031997	3793.53	412.668	2636.7	125.679	4512.47	206.349	3273.63	119.422
	Brip1	NM_178309	342.733	10.4381	458.033	9.33137	218.667	9.03426	291.067	7.17434
	Rnf220	NM_025739	314.767	9.7059	336.233	18.4655	240.567	8.59929	268.867	8.95997
	Gemin4	NM_177367	1892.53	133.782	2068.47	26.8946	1427.77	55.2683	1603.67	61.9786
	Bcl2l11	NM_207680	201.833	4.20648	171.3	8.19024	203.167	5.25907	162.467	6.88799
	Fgd6	NM_053072	717.3	19.3086	523.1	40.2637	763.9	9.75209	644.6	22.5586
	Map2k4	NM_009157	2343.5	6.30423	2503.03	120.909	1827.33	43.5529	1944	46.9454
	-	XM_484305	2350.2	76.4482	1800.33	73.1085	2655.27	72.1203	1886.67	13.6446
	Phf19	NM_028716	564.067	32.1796	799.567	45.064	330.9	4.63069	495.9	20.694
	Prpf3	NM_027541	3451.97	220.104	3553.23	81.8637	2704.63	38.7132	2903.9	118.645
	Orai1	NM_175423	480.833	21.707	518.2	16.1599	370.133	12.4994	395.033	22.8813
	Polr2d	NM_027002	847.5	11.9438	917.333	30.4629	647.867	38.2938	697.9	22.1786
	Ppapdc1b	NM_028000	880.7	49.6952	662.8	11.658	949.367	7.1966	736.267	11.6905
	Dnajb9	NM_013760	757.3	33.3447	446.833	14.9552	945.267	41.2451	755.267	85.6169
	Mtx1	NM_013604	3935.47	119.592	4488.73	54.3892	2762.27	117.297	3343	109.144
	Mtmr14	NM_026849	436.4	15.1218	473.3	32.0658	313.233	5.9468	378.2	26.3896
	Sigmar1	NM_011014	633.567	39.6743	645.133	18.4548	498.9	5.51936	522.8	20.3323
	Rab2a	NM_021518	4798.3	99.1902	5091.47	255.778	4019.63	171.27	3600.1	129.278
	Fignl1	NM_021891	1630.53	33.5302	1847.6	73.3118	1121.57	56.1769	1423.33	12.8271
	Cd9	NM_007657	11761.1	333.384	12356.8	394.527	9321.8	173.302	9368.2	232.203
	Zfp704	NM_133218	283.833	14.2057	310.167	20.9746	239.133	5.82132	206.767	2.00194
	Mrp63	NM_026401	252.133	9.31975	277.1	7.74855	191	12.9624	202.367	8.22685
	Rangrf	NM_021329	1529.73	85.8206	1733.7	66.756	1106.07	48.9941	1254.8	60.1003
	-	XM_123003	869.8	33.2145	875.1	31.1288	673.367	7.90808	730.633	1.38363
	Tmc6	NM_145439	546.267	26.1652	451.5	43.359	588.533	9.94138	406.4	3.10215
	Arf6	NM_007481	4408.63	216.196	5032.4	77.8441	3063.17	84.5077	3737.8	48.9921
	Gatc	NM_029645	1212.8	77.9921	1396.3	32.4688	888.833	40.47	959.2	86.1936
	Heatr1	NM_144835	1832.07	70.2433	1868.57	64.8125	1392.43	86.2416	1547.77	55.6035
	Dmtf1	NM_011806	1899.2	107.92	1548.6	31.9093	1901.93	71.0389	1491.8	33.1068
	Adh7	NM_009626	5246.1	307.758	5958.4	348.119	3665.1	233.257	4353.8	219.624
	Oxct1	NM_024188	7675.5	434.577	7791.33	185.711	5864.97	193.367	6352.37	275.234
	Gorasp2	NM_027352	5536.07	84.6539	5670.6	25.3583	4336.13	261.707	4422	370.515
	Aldoc	NM_009657	618.067	46.0025	390.9	19.4775	788.467	30.8622	515.3	26.4716
	4831426I19Rik	NM_172500	589.333	16.1262	689.967	20.0293	406.067	22.6264	480.167	43.5502
	Dusp7	NM_153459	2837.37	81.3163	3001.93	69.3881	2156.57	159.198	2265.87	62.3303
	Atl3	NM_146091	503.8	20.351	377.867	10.8419	548.167	8.88826	397.4	14.3263
	Slc35a4	NM_026404	3148.9	115.121	3385.6	175.899	2242.37	20.327	2652.2	91.71
	4833418A01Rik	NM_198005	460.533	16.8519	480.267	11.0912	348.5	26.2001	371.767	15.9391
	5730419I09Rik	NM_029081	490.967	44.6395	640	28.4199	303	16.8619	408.633	9.04255
	Dmrta2	NM_172296	2396.73	86.9556	2837.47	270.54	1768.7	118.094	1779.03	88.4221
	Snx9	NM_025664	1865	63.46	1935.5	50.8357	1388.6	71.5643	1532.17	11.1673
	Evi2a	NM_010161	294.133	10.693	294.333	15.5163	232.133	3.11038	234	12.108
	Ywhaz	NM_011740	20710.9	452.37	21095.4	999.445	15959.2	390.645	16627.3	432.775
	Lpar3	NM_022983	407.167	16.8636	428.367	17.9875	314.267	13.3029	316.067	18.8326
	Nudcd3	NM_173748	274.3	6.28649	299.533	13.2296	207.533	2.87189	210.467	5.32051
	Slmap	NM_032008	3048.57	107.56	3294.8	73.8821	2309.63	123.428	2349.13	123.082
	Mre11a	NM_018736	265.8	2.00333	274.567	2.56926	193.6	3.50856	220.867	5.26951
	D930001I22Rik	NM_173397	1073.53	120.346	1275.77	66.5747	696.733	31.9065	899.1	68.6484
	Ubl4	NM_145405	910.067	21.6218	943.3	25.6913	724.8	13.4188	685.4	32.12
	Slc5a6	NM_177870	1909.6	102.758	2020.2	113.657	1413.53	32.3352	1522.33	38.3035
	Slc39a14	NM_144808	222.733	9.42591	233.233	3.84419	167.767	10.011	175.333	4.34447
	-	NM_175108	311.833	7.61453	320.833	13.6731	237.333	3.04704	246.267	20.3164
	Cox6b1	NM_025628	11666.6	273.083	11916.1	310.756	9362.43	494.738	8770.33	39.1199
	Bend3	NM_199028	275.967	3.88215	282	7.5798	208.567	11.5969	219.733	8.33173
	Mars	NM_001003913	1114	51.1067	1286.2	58.7268	760.3	25.6798	892.667	24.6482
	Mgp	NM_008597	9120.3	288.684	7133.7	331.557	9451.93	712.313	6908.07	161.253
	Nudt12	NM_026497	222.1	8.81986	242.267	9.72443	163.8	4.93592	170.133	8.62735
	Stt3a	NM_008408	832.8	33.2374	869.133	56.1578	645.833	18.5768	625.867	14.4562
	Smug1	NM_027885	705.8	47.8667	778.367	39.7423	504.167	17.6675	551.4	12.1503
	Tcfap2c	NM_009335	5917.13	304.321	6533.2	229.333	4570.53	552.897	4251.13	187.131
	Rab15	NM_134050	273.033	12.7714	221.967	9.79631	277.433	6.47311	199.3	1.35031
	Mvp	NM_080638	2156.33	109.816	1646.93	60.3238	2204.4	89.5798	1655.57	12.6777
	Ankrd17	NM_198010	215.633	15.3421	216.267	5.09913	165.733	2.8591	166.4	6.18789
	Fbxl14	NM_133940	3332.57	144.328	3904.4	181.564	2209.3	130.727	2650.07	100.911
	-	XM_128418	255.767	33.8879	336.833	26.9426	165.1	10.0255	187.7	11.9634
	Slc20a2	NM_011394	4395.63	300.948	4445.33	93.0182	3658.8	232.343	3128.27	50.6439
	Uaca	NM_028283	2216.17	138.314	2678.83	183.935	1365.1	24.6639	1868.1	118.782
	4831426I19Rik	NM_172500	335.867	4.57578	408.6	6.70398	233.967	6.90515	242.7	10.1687
	Mto1	NM_026658	522.2	24.2079	532.167	12.4248	397.233	15.0118	397.767	18.0289
	-	XM_131044	910.967	42.7185	1010.33	72.8668	642.4	40.8621	700.667	11.5482
	Prkag2	NM_145401	812.8	27.2786	823.233	35.205	603.933	35.557	636.233	32.2441
	Sv2a	NM_022030	380.567	29.0733	299.367	14.7558	393.1	13.8597	277.333	7.88761
	Rab8b	NM_173413	2368.17	76.1545	2493.67	205.177	1665.53	28.4121	1880.27	91.1903
	AI597468	NM_001013028	1040.8	67.0883	750.833	46.8912	1101	20.8545	799.7	53.327
	Etaa1	NM_026576	1040.77	19.5385	1040.97	25.0988	741.933	30.7636	840.333	60.2965
	Prss22	NM_133731	516.633	6.24615	565.6	25.8374	359.7	29.0696	397.3	41.7848
	-	NM_025880	1227.5	108.369	880.467	26.2827	1278.13	18.2194	951.8	56.9042
	Lpar3	NM_022983	477.467	9.52651	487.967	20.2007	363.767	22.9024	353	8.70019
	Ap1gbp1	NM_194341	342.8	10.5083	273.633	5.64456	344.4	10.2357	245.267	13.4735
	1110012J17Rik	NM_172963	1262.63	89.2007	1423.5	24.9985	900.867	40.2867	918.133	42.6337
	-	NM_025880	1086	34.5704	796.567	15.5898	1103.43	27.48	833.033	23.7295
	Vav3	NM_146139	4159.3	89.6465	4654.33	231.547	3002.17	135.567	2993.3	160.333
	Gzme	NM_010373	261.733	5.57863	263.233	7.46041	189.233	10.2348	204.233	15.2955
	Lifr	NM_013584	240.867	3.30673	259	9.82446	180.867	16.8559	171.733	12.0445
	Angptl2	NM_011923	415	9.9985	451.1	20.7435	301.067	3.24568	300.567	8.24304
	Rnf141	NM_025999	281.9	11.6337	299.933	9.69885	190.967	6.78167	223.733	4.50642
	Slc12a2	NM_009194	7538.1	366.89	7591.63	177.892	5736.23	151.948	5503.9	309.872
	Snx16	NM_029068	513	32.2228	360.533	8.65262	532.967	12.1565	396.267	7.56689
	Adam8	NM_007403	233.5	8.90917	240.1	15.3024	171.133	5.01143	173.9	9.37923
	Cux1	NM_198602	829.867	69.6884	922.6	18.5935	593.867	41.3743	595.4	27.948
	Epor	NM_010149	227.167	4.10298	230.5	13.2605	167.1	5.22015	169.967	3.03882
	-	NM_172531	1415.83	81.3521	1524.8	32.3036	1037.4	15.7151	1004.97	20.5229
	Cd53	NM_007651	186.6	5.77264	207.5	2.17025	130.367	2.33833	135.367	6.45506
	Nsmce1	NM_026330	4725.47	229.653	4877.9	239.925	3458.03	130.591	3454.9	229.031
	Cnih4	NM_030131	8050.8	420.4	9203.9	240.088	5276.43	116.387	6089.63	58.9128
	Slc16a13	NM_172371	273.633	8.23212	295.4	5.28488	202.233	5.01907	190.7	6.0136
	Cox6b1	NM_025628	8965.5	426.831	9140.5	361.55	6608	280.841	6501	201.45
	Xpnpep3	NM_177310	1608.5	110.15	1692.4	35.3323	1135.73	35.2247	1189.07	62.7209
	Gnb1l	NM_023120	885.933	60.1849	1046.97	48.8331	547.767	28.4888	690.367	20.248
	Thg1l	NM_001080969	544.8	28.0643	599.933	22.1131	365.533	20.0716	409.5	27.7249
	Cd44	NM_001039150	4123.47	227.811	4179.57	230.198	2878.03	113.47	3153.93	196.741
	Tex261	NM_009357	2476.9	93.0755	2689.73	36.6399	1793	40.2368	1715.33	97.5809
	Plp2	NM_019755	1960.27	15.0334	2100.5	16.9152	1412.07	19.5436	1369.6	102.476
	Pitpnm2	NM_011256	715.4	40.0767	721.1	10.5788	553.433	47.2774	488.5	10.3162
	Ddx18	NM_025860	5854.3	28.4026	5882.43	134.711	4134.33	200.519	4342.57	148.286
	Sav1	NM_022028	4375.2	142.24	4477.8	88.7398	3029.97	130.702	3247.53	131.923
	Tmem126a	NM_025460	6383.8	327.052	6631.47	110.538	4582.83	317.03	4485.93	119.872
	Chrnb1	NM_009601	1161.73	57.0525	1323.17	55.2634	734.667	32.8664	868.833	8.27634
	-	XM_125952	3016.07	252.896	3245.57	14.4599	1935.77	40.8807	2322.5	108.369
	Pcgf6	NM_027654	1114.6	22.1802	1118.93	54.1741	843.467	61.3102	755.767	11.3211
	Bcar3	NM_013867	2155.7	148.882	2520.3	200.377	1359.63	159.094	1564.33	127.215
	Wfs1	NM_011716	469.333	26.9105	521.567	26.0661	316.567	15.9775	329.1	18.8571
	Chrnb1	NM_009601	3977.8	168.957	4398.57	270.95	2545.8	137.718	2960.5	123.919
	Ran	NM_009391	1588.6	59.5878	1595.5	77.0152	1063.97	35.2481	1210.07	43.7049
	Galm	NM_176963	494.9	21.1968	508.233	29.5412	338.433	22.1248	359.667	15.4283
	Atl3	NM_146091	756.067	4.6477	451.2	17.9034	827	34.7018	612.867	15.7228
	Il13ra1	NM_133990	776.967	39.6823	793.2	24.506	587.467	14.147	512.6	27.067
	B930041F14Rik	NM_178699	311.767	6.36195	202.7	7.56042	341.033	18.0845	225.567	2.5208
	Emp3	NM_010129	2147.5	77.6008	2280.83	106.649	1554.7	59.7512	1415.1	113.652
	Il18rap	NM_010553	622.933	7.32628	672.4	49.2164	392.3	18.9004	468.8	33.9395
	Ino80c	NM_172625	733.367	49.4694	754.967	36.6163	467	15.8926	558.267	21.0905
	Foxo1	NM_019739	736.467	20.4084	815.533	39.976	455.933	32.946	541.833	43.4699
	Il1rl1	NM_010743	3278.1	177.42	4029.07	158.888	1996.17	276.035	2245.8	130.681
	Cd109	NM_153098	326.533	23.7466	333.8	26.5519	233.6	9.26301	217.233	6.96906
	Mavs	NM_144888	809.667	65.9962	863.733	75.1942	542.733	32.6858	555.2	25.4724
	-	NM_001033193	580.9	34.6554	363.233	19.6829	624.467	19.6182	427.133	15.828
	Asb8	NM_030121	2927.4	278.571	3078	103.202	1934.67	52.8372	2052.27	35.9762
	Polr2d	NM_027101	1269.77	61.0192	1290.93	62.7853	847.833	44.364	901.433	29.781
	Hao1	NM_010403	226	13.338	234.467	5.34301	145.167	7.50207	164.2	6.72632
	Otud7a	NM_130880	179.433	5.20555	194.4	4.87887	118.033	7.3644	121.8	2.97153
	Hmga1	NM_016660	459.6	46.4556	469.867	14.9064	299.633	8.34692	325.4	1.85203
	Gtpbp3	NM_032544	1591.13	57.9259	1603.17	85.6606	1004.6	38.3261	1176.3	57.4521
	Grem1	NM_011824	18573.7	1023.74	21684.1	705.9	12447.5	982.963	11482.1	316.266
	Errfi1	NM_133753	6255.8	235.258	7150.63	439.569	4090.2	525.602	4013.53	97.2794
	Rbm8a	NM_025875	1271.27	51.2612	1426.57	65.721	764.867	68.4959	896.233	7.38407
	Tdrd7	NM_146142	1006.07	12.6768	1009.07	35.2099	690.867	18.3939	668.367	23.8734
	Sigirr	NM_023059	273.667	13.4433	294.433	19.1339	170.367	5.01941	191.3	6.99452
	Tmem48	NM_028355	2030.4	52.379	2943.37	111.64	978.433	26.5877	1508	43.4774
	Atl3	NM_146091	1103.5	41.4219	620.867	43.5935	1253.33	75.5977	822.933	13.5615
	Ank3	NM_170689	606.2	24.3674	681.333	49.025	380.533	30.5666	395.933	13.5635
	Nkx2-3	NM_008699	413.633	27.7923	436.867	8.27654	272.5	20.5627	265.9	27.9002
	Hps6	NM_176785	718.3	40.4475	738.967	50.1244	481.2	38.4542	462.167	30.9097
	Egln3	NM_028133	3008.53	92.2945	3275.87	131.373	1812.67	143.455	2066.33	132.116
	Pde4dip	NM_001039376	6806.2	216.011	7591.43	133.878	4170.1	301.034	4478.73	143.397
	Scrn1	NM_027268	895.9	24.2001	959.6	52.3462	583.967	45.5359	556.2	16.0827
	Plxna2	NM_008882	1085.73	125.98	682.633	13.8927	1168.43	37.9546	688.067	36.9782
	Cugbp2	NM_010160	2260.17	189.236	2348.03	111.295	1470.17	17.7708	1414.67	32.2023
	-	NM_001025358	698.033	26.1795	716.967	35.2626	456.033	25.2144	437.833	10.6699
	Aatf	NM_019816	1073	33.0567	1235.77	67.3185	662.733	27.4676	656.567	19.4508
	Twist2	NM_007855	2215.33	98.9905	2390.77	131.528	1347.97	76.5154	1425	76.9911
	Etv5	NM_023794	477.067	25.4137	536.533	58.7735	301.533	28.0844	284.067	19.8004
	Usp6nl	NM_181399	1961.23	46.217	2009.83	116.758	1261.07	21.8826	1216.23	43.1624
	-	XM_129211	12872.2	162.612	13407.3	15.1333	7127	255.709	9161.97	829.94
	Pmaip1	NM_021451	2028.87	206.766	2336.07	190.78	1152.67	113.107	1284.83	71.4774
	Abhd1	NM_021304	924.267	12.5425	1056.3	38.711	531.9	14.5005	568.667	34.4471
	Fut8	NM_016893	1990.93	138.148	2053.37	103.688	1193.93	76.6495	1247.67	20.1317
	Klc1	NM_001025360	839.7	59.9695	889.467	37.8798	510.767	17.0169	503.4	3.18957
	Slc9a3r1	NM_012030	1099.77	71.7876	1129.03	59.8078	727.8	10.2481	620.733	53.4284
	Sp5	NM_022435	890.267	36.8462	1295.67	17.5416	435.733	54.8771	532.933	20.7107
	Sult2b1	NM_017465	389.067	47.5803	445.167	43.8834	223.533	4.09932	233.433	10.6258
	Tcf19	NM_025674	894	71.3132	475.033	16.17	897.2	71.1143	641.333	30.6972
	2810452K22Rik	NM_026048	1430.33	9.61775	1527.33	20.4397	828.867	10.5597	880.733	37.1069
	Cugbp2	NM_010160	2830.07	83.4066	2862.8	105.61	1737.77	81.6908	1698.73	103.136
	Gnb4	NM_013531	526.8	36.4967	553.3	8.23468	320.767	21.5766	309.6	31.022
	Traf1	NM_009421	652	37.899	778.267	46.5262	345.433	32.7498	406.7	32.5079
	Socs5	NM_019654	2315	83.5527	2591.63	62.9229	1326.53	23.4198	1376.1	79.3577
	Oxr1	NM_130885	1641.47	78.7885	1824.5	68.4127	946.467	43.7042	968.267	35.5425
	Ocrl	NM_177215	968	33.5774	1003.77	24.6659	583.633	25.6334	569.633	5.32927
	Krt13	NM_010662	250.633	14.4111	269.9	11.6937	150.933	10.5862	144.2	0.360555
	Gm347	NM_001005420	442.333	56.3477	256.467	10.3655	443.967	17.6123	275.333	13.5359
	Mcm6	NM_008567	314.133	15.6351	186.233	7.96876	328.467	16.228	185.633	6.09162
	Pthlh	NM_008970	406.833	15.5703	420.067	22.3231	238.067	21.4953	240.333	19.3624
	Tnfaip2	NM_009396	1033.7	21.9012	1129.47	70.5611	596.033	45.6868	597.933	7.54107
	Tns4	NM_172564	407.9	17.3267	412.4	35.8493	235.267	14.4758	245.167	8.25476
	Abhd1	NM_021304	993.6	94.5137	1081.9	80.6713	549.5	51.4749	595.833	3.45076
	-	XM_129268	4386.3	297.282	4516.23	255.486	2634.4	347.113	2489.63	173.949
	Csda	NM_139117	7742.83	433.458	8127.37	662.37	4499.57	165.062	4474.7	165.461
	Plekhm1	NM_183034	1503.23	36.4873	1567.57	72.5378	889.667	93.659	851.9	64.5628
	Apcdd1	NM_133237	1638.6	123.373	1729.23	183.491	919.9	70.9811	962.133	39.5645
	Rnf125	NM_026301	420.8	12.1651	425.8	14.8563	239.2	9.19946	249.8	20.9338
	Centb1	NM_153788	509.1	38.1535	513.867	27.5561	305.167	25.1824	286.6	8.73689
	Cbfa2t3	NM_009824	442.4	45.0805	459.3	48.735	270.067	16.2924	238.333	12.6151
	Prkg2	NM_008926	1219.63	19.212	1511.07	14.6518	628.033	24.1462	693.967	12.4796
	Abhd1	NM_021304	1893.93	20.2066	1974.93	60.8849	1106.33	98.737	1054.93	2.9492
	Cd55	NM_010016	1381.27	71.2673	1419.87	52.7896	808.4	8.31625	768.8	26.9496
	Gm71	NM_001033236	503.3	19.0794	509	27.0734	277.5	8.7155	300	9.53537
	-	XM_147333	668	66.5978	694.433	13.0502	382.567	18.4711	369.433	11.5271
	Fosl1	NM_010235	618.333	63.8983	726.367	35.285	320.767	37.1078	350.767	13.0825
	Inpp5a	NM_183144	1429.3	15.6577	1440.73	24.5364	858.267	29.1832	759.167	25.5578
	Grip1	NM_130891	822.433	86.3233	978.6	96.4836	442.133	47.4425	435.333	27.8726
	Mertk	NM_008587	1185.8	97.768	1216.27	116.453	732.167	49.5342	602.733	26.5896
	Aatf	NM_019816	739.167	31.5566	772.733	33.765	400.833	22.8789	415.433	6.96332
	Esrrb	NM_011934	2546.8	175.053	2919.03	319.051	1329.77	183.773	1379.1	87.2536
	Mcm6	NM_008567	3490.43	323.474	1791.83	170.086	3637	164.299	1947.23	61.5578
	Hmga1	NM_016660	12528.3	966.136	12624.3	578.631	6594.6	511.733	6798	155.628
	F2rl1	NM_007974	317.2	4.75219	339.2	28.2567	174.233	6.74347	154.833	11.9177
	Tnfaip2	NM_009396	2295.7	77.9008	2321.77	64.6183	1238.53	100.264	1159.23	50.5206
	Fgf8	NM_010205	1704.1	130.956	2411.7	173.644	760.867	120.062	847.467	35.1358
	Barx2	NM_013800	648.833	66.156	691.1	90.2196	326.6	34.4362	338.433	30.4184
	Fxyd5	NM_008761	505.4	36.95	507.233	16.6955	277.867	25.5171	242.367	9.97034
	Grip1	NM_130891	957.2	99.9932	1125.7	81.1985	476.733	65.7768	462.133	40.9392
	Ryr3	NM_177652	595.4	59.9834	636.433	45.0766	281.7	33.0835	309.667	27.17
	Fxyd5	NM_008761	1087.3	125.942	1095.23	46.4773	582.433	54.2049	511.6	49.5193
	Sult2b1	NM_017465	650.9	73.6742	715.3	67.2768	304.233	30.7758	330.2	16.9372
[truncated: 800 more rows]

## Sheet: Table S1(sorted for 4N genes)
	Spreadsheet S1. Genome-wide expression analysis using cell cycle specific sorted cells (2N vs 4N) with or without Pax3:Foxo1a knockdown. This list is sorted by for 4N differential expression of genes. Genes in Figure 4C are in blue.
			Control (Pax3:Foxo1a allowed on)				knock down of Pax3:Foxo1a				ratio 4N knockdown: 4N control
			2N		4N		2N		4N
	Gene ID	Gene Identifier	mean	SEM	mean	SEM	mean	SEM	mean	SEM
	Il24	NM_053095	5245.77	86.1737	5122.8	270.868	1801.27	360.777	1504.9	213.944	0.293765
	Pvrl2	NM_008990	1626.77	121.093	1741.83	139.572	592.267	29.0396	583.833	60.5123	0.335184
	Id4	NM_031166	3483.8	36.6937	2746.1	182.247	1332.8	238.444	955.767	41.3594	0.348045
	Fgf8	NM_010205	1704.1	130.956	2411.7	173.644	760.867	120.062	847.467	35.1358	0.351398
	Pvrl2	NM_008990	1011.63	45.4601	1114.5	64.08	411.6	32.2505	431.867	40.1315	0.387498
	Cdh6	NM_007666	1950.4	326.142	1719.6	115.334	755.1	43.8224	672.667	36.6729	0.391176
	Grip1	NM_130891	957.2	99.9932	1125.7	81.1985	476.733	65.7768	462.133	40.9392	0.410529
	Sp5	NM_022435	890.267	36.8462	1295.67	17.5416	435.733	54.8771	532.933	20.7107	0.411318
	Vat1l	NM_173016	3042.03	173.786	2867.03	169.664	1596.1	222.118	1184.23	58.3198	0.413051
	Itgb7	NM_013566	1075.3	52.9086	977.4	12.5766	396.4	39.2921	404	12.676	0.413342
	Fxyd5	NM_008761	1347.5	124.485	1390.07	50.4568	670.633	91.027	585.467	34.3929	0.421178
	Sema7a	NM_011352	817.6	52.4815	746.8	34.6758	367.367	26.4971	319.5	29.3739	0.427825
	Chst1	NM_023850	2651.93	46.4242	2275.8	46.3369	1314.07	59.7232	1002.3	33.6151	0.440417
	Cxadr	NM_001025192	2517.13	322.984	2238.3	239.946	1133.2	116.287	990.667	82.4442	0.442598
	Gprc5a	NM_181444	2669.97	142.178	2434.87	135.063	1335.87	69.6218	1079.67	9.90712	0.44342
	Grip1	NM_130891	822.433	86.3233	978.6	96.4836	442.133	47.4425	435.333	27.8726	0.444853
	H2afx	NM_010436	2986.83	209.049	7026.13	113.731	1222.17	68.2675	3144.13	41.1886	0.447491
	Gpd2	NM_010274	2988.73	266.05	2189.47	80.922	1476.17	50.2723	990.767	13.6261	0.452515
	-	XM_358328	2831.57	84.2587	2329.53	22.7497	1332.63	9.25371	1058.9	4.30968	0.454555
	Areg	NM_009704	574.3	44.4516	452.233	25.9968	244.933	9.81501	205.633	9.71757	0.454706
	F2rl1	NM_007974	317.2	4.75219	339.2	28.2567	174.233	6.74347	154.833	11.9177	0.456465
	Lbh	NM_029999	4221.33	204.494	3627.57	38.7609	2300.7	14.046	1656.93	35.3052	0.45676
	Prkg2	NM_008926	1219.63	19.212	1511.07	14.6518	628.033	24.1462	693.967	12.4796	0.459255
	Sult2b1	NM_017465	650.9	73.6742	715.3	67.2768	304.233	30.7758	330.2	16.9372	0.461624
	Etv4	NM_008815	1421.2	81.7885	1337.27	64.4336	660.033	32.0109	617.7	12.5289	0.461911
	Mcpt8	NM_008572	801.367	118.994	825.367	66.2328	358.733	52.1332	383.833	40.5933	0.465045
	Fxyd5	NM_008761	1087.3	125.942	1095.23	46.4773	582.433	54.2049	511.6	49.5193	0.467116
	Esrrb	NM_011934	2546.8	175.053	2919.03	319.051	1329.77	183.773	1379.1	87.2536	0.472451
	Plvap	NM_032398	1507.2	181.689	1224.8	133.216	784.267	60.4112	580.833	32.9839	0.474227
	Atp13a4	NM_172613	351.5	29.7022	331.633	50.0541	149.267	5.38836	157.8	6.50564	0.475827
	Fxyd5	NM_008761	505.4	36.95	507.233	16.6955	277.867	25.5171	242.367	9.97034	0.477822
	Larp6	NM_026235	646.067	34.1764	575.267	29.276	314.933	32.5624	275.333	16.8381	0.478618
	Eif4e2	NM_023314	1939.7	105.82	1973.8	45.1106	962.6	49.2148	945.867	38.2054	0.479211
	Pparg	NM_011146	3978.67	281.018	3480.83	288.215	1789.6	229.832	1668.63	176.563	0.479377
	Ptgs1	NM_008969	1002.33	50.6802	886.033	42.5164	450.1	16.4272	426.233	9.66304	0.481058
	Fosl1	NM_010235	618.333	63.8983	726.367	35.285	320.767	37.1078	350.767	13.0825	0.482906
	Dll1	NM_007865	1889.73	41.5136	1827.73	20.8064	922.267	104.15	883.733	71.1437	0.483514
	Larp6	NM_026235	780.233	83.3904	635.067	58.5458	366.833	42.2286	308.267	17.7195	0.485409
	Ryr3	NM_177652	595.4	59.9834	636.433	45.0766	281.7	33.0835	309.667	27.17	0.486567
	Podxl	NM_013723	1065.83	103.971	825.733	54.2046	396.9	26.1863	402.933	31.4376	0.48797
	Barx2	NM_013800	648.833	66.156	691.1	90.2196	326.6	34.4362	338.433	30.4184	0.489702
	Tbc1d2	NM_198664	888.6	47.9538	800.967	46.9769	434.9	39.9571	396.067	19.7334	0.494486
	Gchfr	NM_177157	2852.67	186.97	2640.6	182.309	1510.1	131.252	1307.37	40.0663	0.495103
	Mertk	NM_008587	1185.8	97.768	1216.27	116.453	732.167	49.5342	602.733	26.5896	0.495559
	Osbpl6	NM_145525	766.333	49.5225	671.333	29.1695	398.933	12.4035	333.233	9.75881	0.496375
	Tnfaip2	NM_009396	2295.7	77.9008	2321.77	64.6183	1238.53	100.264	1159.23	50.5206	0.499287
	Psma7	NM_011969	9537.13	384.788	9187.83	376.614	5114.9	299.893	4595.2	252.97	0.50014
	Dusp4	NM_176933	1379.13	62.7405	1072.2	36.6419	647.367	49.3779	536.767	24.5974	0.500622
	Rps6ka4	NM_019924	1620.53	46.4793	1470.9	35.0862	855.233	6.91142	737.1	27.7663	0.501122
	Klc1	NM_001025360	3751.27	253.638	3741.8	175.964	2386.87	171.742	1884.43	47.2208	0.503616
	Vti1b	NM_016800	6651.77	229.846	6179.53	295.81	3300	137.754	3124.43	305.08	0.50561
	Gcnt1	NM_173442	878.3	16.1	724.7	10.054	466.767	9.74976	368.4	24.4361	0.508348
	Zadh2	NM_146090	935.733	20.9663	882.733	69.7269	461.333	19.0544	450.333	29.1886	0.510158
	Tmem48	NM_028355	2030.4	52.379	2943.37	111.64	978.433	26.5877	1508	43.4774	0.512338
	Cbfa2t3	NM_009824	442.4	45.0805	459.3	48.735	270.067	16.2924	238.333	12.6151	0.518905
	Ppap2c	NM_015817	2032.37	143.829	2015.7	68.2266	1132.37	57.6828	1049.3	44.0065	0.520564
	Serpinb2	NM_011111	316.5	25.1696	243.2	10.595	154.133	5.15019	126.733	7.70483	0.521106
	Traf1	NM_009421	652	37.899	778.267	46.5262	345.433	32.7498	406.7	32.5079	0.522571
	Sult2b1	NM_017465	389.067	47.5803	445.167	43.8834	223.533	4.09932	233.433	10.6258	0.524372
	Ptgs1	NM_008969	1697.2	117.827	1584.4	58.0147	883.5	75.934	830.833	28.2019	0.524383
	Satb1	NM_009122	2584.77	148.893	2149.73	134.216	1584.3	89.6209	1129.87	98.9569	0.525587
	Inpp5a	NM_183144	1429.3	15.6577	1440.73	24.5364	858.267	29.1832	759.167	25.5578	0.526932
	Tnfaip2	NM_009396	1033.7	21.9012	1129.47	70.5611	596.033	45.6868	597.933	7.54107	0.529393
	Etv5	NM_023794	477.067	25.4137	536.533	58.7735	301.533	28.0844	284.067	19.8004	0.529449
	Grem1	NM_011824	18573.7	1023.74	21684.1	705.9	12447.5	982.963	11482.1	316.266	0.529517
	Oxr1	NM_130885	1641.47	78.7885	1824.5	68.4127	946.467	43.7042	968.267	35.5425	0.530703
	Socs5	NM_019654	2315	83.5527	2591.63	62.9229	1326.53	23.4198	1376.1	79.3577	0.530979
	Aatf	NM_019816	1073	33.0567	1235.77	67.3185	662.733	27.4676	656.567	19.4508	0.531302
	-	XM_147333	668	66.5978	694.433	13.0502	382.567	18.4711	369.433	11.5271	0.531992
	Tnfaip2	NM_009396	4248.9	169.426	4208.73	269.532	2422.37	169.452	2241	190.529	0.532465
	Abhd1	NM_021304	1893.93	20.2066	1974.93	60.8849	1106.33	98.737	1054.93	2.9492	0.534161
	Krt13	NM_010662	250.633	14.4111	269.9	11.6937	150.933	10.5862	144.2	0.360555	0.534272
	Dynlt3	NM_025975	2167.87	250.711	2079.6	27.8324	1213.13	20.4224	1111.5	25.0241	0.534478
	St3gal1	NM_009177	1345.2	81.2906	1131.07	49.1265	749.333	40.2317	604.8	13.6572	0.534715
	Aatf	NM_019816	739.167	31.5566	772.733	33.765	400.833	22.8789	415.433	6.96332	0.537615
	Abhd1	NM_021304	924.267	12.5425	1056.3	38.711	531.9	14.5005	568.667	34.4471	0.538357
	Hmga1	NM_016660	12528.3	966.136	12624.3	578.631	6594.6	511.733	6798	155.628	0.538485
	-	XM_127139	2602.67	114.745	2472.87	265.672	1430.13	114.648	1334.07	29.3323	0.539482
	Ano1	NM_178642	644.533	13.5777	571.4	37.2743	351.733	11.3357	309.067	17.482	0.540894
	Cd55	NM_010016	1381.27	71.2673	1419.87	52.7896	808.4	8.31625	768.8	26.9496	0.541458
	Psma7	NM_011969	9251.57	528.745	8240.53	290.682	4895.2	233.849	4467.67	496.675	0.542158
	-	NM_019638	1851.57	153.767	1847.6	49.9732	1005.5	65.4615	1001.93	86.0169	0.542287
	Gchfr	NM_177157	1588.17	53.0485	1495.7	76.0067	918	70.7029	811.533	17.4414	0.542577
	Plekhm1	NM_183034	1503.23	36.4873	1567.57	72.5378	889.667	93.659	851.9	64.5628	0.543453
	Lbh	NM_029999	581.4	40.2839	521.033	11.4374	372.967	10.3399	283.233	9.59884	0.543599
	Vti1b	NM_016800	3689.57	58.3164	3370.87	228.887	2104.73	51.0186	1837.97	107.622	0.545251
	Slco4a1	NM_148933	538.567	54.1999	351.533	35.9135	219.067	27.1405	191.8	19.1818	0.54561
	Pctk1	NM_011049	1169.03	61.0438	1094.73	32.544	723.533	24.1027	599.8	8.78427	0.547898
	Gcnt1	NM_173442	1416.6	22.6046	1088.1	30.1967	739.833	82.6475	598.2	26.7894	0.549766
	Slc9a3r1	NM_012030	1099.77	71.7876	1129.03	59.8078	727.8	10.2481	620.733	53.4284	0.549793
	Pparg	NM_011146	1333.97	118.632	1165.67	113.334	647.767	56.5639	640.9	35.8573	0.549813
	Pmaip1	NM_021451	2028.87	206.766	2336.07	190.78	1152.67	113.107	1284.83	71.4774	0.549996
	Csda	NM_139117	7742.83	433.458	8127.37	662.37	4499.57	165.062	4474.7	165.461	0.550572
	Abhd1	NM_021304	993.6	94.5137	1081.9	80.6713	549.5	51.4749	595.833	3.45076	0.550728
	-	XM_129268	4386.3	297.282	4516.23	255.486	2634.4	347.113	2489.63	173.949	0.551263
	1810055E12Rik	NM_026437	1065.23	96.1194	1003.57	19.7506	623.567	18.4415	554.467	14.8236	0.552495
	Gfod1	NM_001033399	1681.53	156.933	1651.37	38.6993	1007.3	84.2508	914.833	54.5645	0.553984
	1810055E12Rik	NM_026437	2290.2	165.354	2089.17	117.303	1254.07	36.4216	1158.13	12.3791	0.554349
	Apcdd1	NM_133237	1638.6	123.373	1729.23	183.491	919.9	70.9811	962.133	39.5645	0.556394
	Esd	NM_016903	457.667	7.89965	433.167	11.2624	250.767	12.4842	241.367	5.66284	0.557215
	-	XM_128418	255.767	33.8879	336.833	26.9426	165.1	10.0255	187.7	11.9634	0.557249
	Il1rl1	NM_010743	3278.1	177.42	4029.07	158.888	1996.17	276.035	2245.8	130.681	0.557399
	-	NM_175338	922.633	82.7505	700.867	56.7904	470.567	20.0192	390.733	26.864	0.557499
	Centb1	NM_153788	509.1	38.1535	513.867	27.5561	305.167	25.1824	286.6	8.73689	0.557732
	Gnb4	NM_013531	526.8	36.4967	553.3	8.23468	320.767	21.5766	309.6	31.022	0.559552
	Sgms2	NM_028943	664.4	27.57	494.733	2.848	362.267	11.8893	277.633	14.3905	0.561177
	Errfi1	NM_133753	6255.8	235.258	7150.63	439.569	4090.2	525.602	4013.53	97.2794	0.561283
	Garnl4	NM_001015046	771.933	52.7598	706.267	46.012	470.367	14.3231	397.5	14.2591	0.562818
	Ptgs1	NM_008969	1022.3	25.2167	884.067	45.1066	474.333	23.0594	499.3	22.0096	0.564776
	Ckb	NM_021273	15208	1052.75	12934	405.191	9338.6	502.684	7314.27	82.7281	0.565507
	Klc1	NM_001025360	839.7	59.9695	889.467	37.8798	510.767	17.0169	503.4	3.18957	0.565957
	Arpc5l	NM_028809	952.933	44.7251	900.2	20.5777	593.633	6.59099	510.067	34.8229	0.566615
	Ocrl	NM_177215	968	33.5774	1003.77	24.6659	583.633	25.6334	569.633	5.32927	0.567494
	Rps24	NM_011297	1492.67	96.5001	1450.7	35.9425	858.267	64.1496	826.433	28.5699	0.569679
	Arhgap22	NM_153800	1123.07	65.9814	1109	14.4421	705.933	37.2711	632.633	31.1695	0.570454
	Fam49a	NM_029758	580.9	62.983	521.4	43.656	324.4	39.5132	297.767	17.683	0.571091
	Pthlh	NM_008970	406.833	15.5703	420.067	22.3231	238.067	21.4953	240.333	19.3624	0.57213
	Agpat2	NM_026212	1621.1	43.4281	1503.87	47.5234	955.833	7.51029	863.367	19.2215	0.574097
	2810452K22Rik	NM_026048	1430.33	9.61775	1527.33	20.4397	828.867	10.5597	880.733	37.1069	0.576649
	Scrn1	NM_027268	895.9	24.2001	959.6	52.3462	583.967	45.5359	556.2	16.0827	0.579617
	Cytip	NM_139200	341.2	16.398	333.867	10.8413	193.3	6.84787	193.933	3.83724	0.580869
	Ank3	NM_170689	606.2	24.3674	681.333	49.025	380.533	30.5666	395.933	13.5635	0.581115
	Eif2b5	NM_172265	3636.43	62.7615	3498.43	44.9321	2163.43	113.307	2034.77	137.392	0.581624
	Eif4e2	NM_001039169	694.2	20.6524	604.233	17.0916	334.367	27.9271	351.633	17.7749	0.581949
	A830007P12Rik	NM_146115	887.433	23.5911	773.767	21.9242	543.067	12.1745	453.3	7.2298	0.585835
	Rnf125	NM_026301	420.8	12.1651	425.8	14.8563	239.2	9.19946	249.8	20.9338	0.58666
	Cdyl	NM_009881	527.133	7.37887	489.867	18.3232	322.533	15.1728	287.467	13.7642	0.586827
	Elovl6	NM_130450	4273.03	225.536	4004.5	136.83	2790.7	51.6765	2351.97	145.292	0.587332
	Gm71	NM_001033236	503.3	19.0794	509	27.0734	277.5	8.7155	300	9.53537	0.589391
	Pde4dip	NM_001039376	6806.2	216.011	7591.43	133.878	4170.1	301.034	4478.73	143.397	0.589972
	Iqgap2	NM_027711	3112.73	214.98	2440.97	281.515	1917.13	205.339	1441	94.7152	0.590339
	Gnb4	NM_013531	694.4	76.962	663.967	40.6806	430.867	6.99936	392.233	8.62445	0.590742
	Cugbp2	NM_010160	2830.07	83.4066	2862.8	105.61	1737.77	81.6908	1698.73	103.136	0.593381
	Prr11	NM_175563	221.5	10.35	503.333	23.467	155.9	4.55229	298.967	17.6074	0.593975
	4831426I19Rik	NM_172500	335.867	4.57578	408.6	6.70398	233.967	6.90515	242.7	10.1687	0.593979
	Tns4	NM_172564	407.9	17.3267	412.4	35.8493	235.267	14.4758	245.167	8.25476	0.594488
	-	XM_148338	577.3	28.6582	784.933	50.4183	489	56.063	466.8	22.8614	0.5947
	Mboat1	NM_153546	1466.43	139.066	1369.43	76.5784	842.033	68.0462	814.733	45.9186	0.594943
	Eif4e2	NM_023314	481.067	32.1641	456.667	22.5898	314.767	20.2906	272.1	18.2296	0.595839
	Twist2	NM_007855	2215.33	98.9905	2390.77	131.528	1347.97	76.5154	1425	76.9911	0.596042
	Nckap1	NM_016965	3661.23	194.887	3204.9	167.744	2022.7	72.2816	1910.57	224.342	0.59614
	St6galnac2	NM_009180	2687.3	40.3827	2348.3	218.425	1555.47	121.261	1402.8	12.923	0.597368
	Eps8	NM_007945	3298.47	114.47	3119.23	304.828	1823.77	136.151	1866.7	17.0218	0.598449
	Upp1	NM_009477	421.467	24.0104	397.967	24.7741	232.067	9.11817	238.233	14.7752	0.598625
	Hr	NM_021877	525.1	30.3168	470.9	16.2149	323.4	24.8114	281.933	8.28861	0.598711
	Mapk11	NM_011161	1155.37	143.615	899.133	82.1826	763.5	16.007	538.9	19.3505	0.599355
	Aadacl1	NM_178772	7662.13	37.7595	6603.2	388.581	4363.03	307.258	3959.3	220.418	0.599603
	Anxa11	NM_013469	6010.83	684.682	5887.23	389.533	3965.63	237.59	3532.7	85.8	0.600061
	Slco3a1	NM_023908	810.867	31.481	711.4	53.563	484.7	14.0812	427.8	20.2446	0.601349
	Cugbp2	NM_010160	2260.17	189.236	2348.03	111.295	1470.17	17.7708	1414.67	32.2023	0.602492
	Usp6nl	NM_181399	1961.23	46.217	2009.83	116.758	1261.07	21.8826	1216.23	43.1624	0.605141
	Dhx32	NM_133941	1081.77	17.7625	949.433	59.6158	666.467	12.9221	574.667	27.1705	0.605274
	Plk3	NM_013807	865.7	29.8733	778.133	18.9177	569.867	51.1606	471.9	11.5453	0.606452
	Helb	NM_080446	840.8	39.7923	720.733	13.6667	533.367	19.5552	437.767	10.6373	0.607391
	6030419C18Rik	NM_176921	592.967	22.7656	572.133	19.6833	391.7	12.9516	347.533	13.4256	0.607434
	Fut8	NM_016893	1990.93	138.148	2053.37	103.688	1193.93	76.6495	1247.67	20.1317	0.607621
	Usp6nl	NM_001080548	1721	59.3614	1539.37	67.0355	988.333	61.8648	935.8	21.4964	0.607911
	Nkx2-3	NM_008699	413.633	27.7923	436.867	8.27654	272.5	20.5627	265.9	27.9002	0.608652
	2010005J08Rik	NM_178623	793.133	33.2461	711.3	5.64535	511.8	52.75	433.1	21.7332	0.608885
	Mcph1	NM_173189	442.533	20.5086	820.167	32.2532	301.767	1.85502	499.8	23.5676	0.609388
	Pqlc3	NM_172574	716.767	35.4044	614.433	25.7326	410.467	20.8926	374.933	6.19256	0.61021
	Itpk1	NM_172584	952.567	89.9771	829.533	48.8002	497.8	27.1839	506.333	33.2562	0.610383
	-	NM_001025358	698.033	26.1795	716.967	35.2626	456.033	25.2144	437.833	10.6699	0.610674
	Brunol4	NM_133195	442.733	36.594	430	27.2034	288.8	6.60782	262.933	9.83909	0.611472
	Nab1	NM_008667	2373.5	167.755	1953.57	94.8139	1421.83	30.4759	1195.07	22.2887	0.611736
	Csda	NM_139117	2499.53	153.164	2288.67	58.2389	1388.37	50.0539	1400.93	64.8384	0.612115
	Map3k1	NM_011945	1998.57	25.6378	1779.9	17.0048	1309.63	78.8214	1091.97	30.9362	0.613501
	Cyb5b	NM_025558	11155.1	821.665	10624.7	612.361	7021.67	239.647	6525.83	313.269	0.614213
	Emb	NM_010330	21011.5	439.631	19739.2	211.265	15112	1508.58	12133.2	407.368	0.614675
	Sorl1	NM_011436	528.433	61.2157	471.4	22.4248	329.433	2.5208	289.833	13.8855	0.614835
	2310016E02Rik	NM_024460	6025.8	600.88	5930.8	325.228	3926.87	190.342	3647.53	218.707	0.615015
	Helb	NM_080446	1627.13	109.362	1416.7	67.4376	1055.17	49.7874	875.7	31.9264	0.618127
	Ppp1r14c	NM_133485	1403.1	94.9389	1160.4	144.964	885.967	44.9742	718.933	40.4485	0.619556
	Phf19	NM_028716	564.067	32.1796	799.567	45.064	330.9	4.63069	495.9	20.694	0.620211
	Emp3	NM_010129	2147.5	77.6008	2280.83	106.649	1554.7	59.7512	1415.1	113.652	0.620432
	Bcar3	NM_013867	2155.7	148.882	2520.3	200.377	1359.63	159.094	1564.33	127.215	0.620692
	Kif13a	NM_010617	581.633	11.8485	577.2	24.6796	360.433	21.0091	358.933	16.7432	0.621852
	Rprm	NM_023396	297.067	18.7048	216.433	20.8172	165.133	19.7096	134.633	6.05869	0.622054
	Uhrf1bp1	NM_001080769	463.233	37.6157	430.467	39.3916	273.867	10.924	267.8	12.49	0.622115
	Btc	NM_007568	231.467	10.5493	200.7	4.59674	133.267	5.9538	125.133	4.94312	0.623483
	Kif21a	NM_016705	954.6	47.1362	772.167	30.0353	583.1	35.2282	481.667	40.4201	0.623786
	Dusp6	NM_026268	1259.1	74.4495	1141.2	61.2515	871.267	53.3059	713.667	39.8785	0.625365
	Hps6	NM_176785	718.3	40.4475	738.967	50.1244	481.2	38.4542	462.167	30.9097	0.625423
	Dusp6	NM_026268	3870.8	268.63	3450.13	24.6915	2694.8	170.232	2160.8	196.231	0.626295
	Otud7a	NM_130880	179.433	5.20555	194.4	4.87887	118.033	7.3644	121.8	2.97153	0.626543
	Dmrta2	NM_172296	2396.73	86.9556	2837.47	270.54	1768.7	118.094	1779.03	88.4221	0.626978
	Kank3	NM_030697	621.433	23.1915	583.7	35.823	402.667	33.7937	365.967	15.3824	0.626978
	Chka	NM_001025566	442.567	13.4405	417.033	15.7226	306.167	12.8261	261.667	10.9753	0.627449
	Rbm8a	NM_025875	1271.27	51.2612	1426.57	65.721	764.867	68.4959	896.233	7.38407	0.628243
	Alcam	NM_009655	3698.2	145.151	3527.53	174.747	2391.2	39.3331	2218.93	42.9052	0.629032
	Itpr3	NM_080553	2287.47	189.453	1922.6	132.323	1516.9	89.9452	1209.67	82.7548	0.629184
	Itga6	NM_008397	809.067	33.79	755.4	37.9166	495.533	18.505	475.367	16.3733	0.629292
	Scrn1	NM_027268	264.133	12.0075	259.167	14.6721	174.567	16.773	163.2	2.09841	0.62971
	Kcnn4	NM_008433	523.3	32.1532	485.5	20.2752	345.833	37.4544	305.933	8.59638	0.63014
	Egln3	NM_028133	3008.53	92.2945	3275.87	131.373	1812.67	143.455	2066.33	132.116	0.630773
	Wfs1	NM_011716	469.333	26.9105	521.567	26.0661	316.567	15.9775	329.1	18.8571	0.630983
	Fut8	NM_016893	3777.53	255.396	3495.87	248.763	2318	110.028	2215.63	47.4641	0.633785
	1700025G04Rik	NM_197990	1448.2	87.6669	1138.73	141.989	963.267	104.105	722.667	18.6208	0.634625
	Kif5c	NM_008449	535.133	13.8723	521.067	31.5811	335.933	21.7221	330.8	9.45569	0.634851
	Tspan12	NM_173007	996.967	45.8465	898.167	92.9248	621.267	19.0239	570.633	21.2564	0.635331
	Brip1	NM_178309	342.733	10.4381	458.033	9.33137	218.667	9.03426	291.067	7.17434	0.635472
	Mpp6	NM_019939	1276.77	7.40863	1270.83	31.141	814.633	56.2857	807.6	29.2723	0.63549
	Rab31	NM_133685	12359.9	487.993	10777.4	499.705	7682.07	420.982	6849.7	141.463	0.635561
	Timp1	NM_011593	6036.53	235.906	5541.33	133.055	3993.2	166.276	3525.73	176.998	0.636261
	Tsen34	NM_024168	2694.07	177.366	2494.87	146.632	1820.57	117.319	1587.93	62.2929	0.636478
	Tmem20	NM_175507	816.467	54.0131	535.467	7.88021	432.533	22.5404	340.9	19.8117	0.636641
	Stk40	NM_028800	970.467	44.7761	932.533	12.781	703.067	11.1732	593.733	14.0606	0.636688
	Dusp4	NM_176933	400.433	9.35492	347.133	4.967	218.267	12.5672	221.1	6.68431	0.636932
	Bok	NM_016778	11425.4	915.543	10736.5	710.531	7066.1	286.595	6838.47	308.783	0.636937
	Nab1	NM_008667	2181.27	175.004	1690.63	110.913	1238.5	33.5009	1077.7	23.6238	0.637455
	Tex261	NM_009357	2476.9	93.0755	2689.73	36.6399	1793	40.2368	1715.33	97.5809	0.637733
	Map2k3	NM_008928	8595.23	115.935	8156.33	209.009	5679.8	223.239	5207.1	94.7708	0.638412
	5730419I09Rik	NM_029081	490.967	44.6395	640	28.4199	303	16.8619	408.633	9.04255	0.638489
	Olfm1	NM_019498	838.267	63.3759	686.2	57.4228	576.167	31.6262	439.033	16.4059	0.639803
	Reep5	NM_007874	915.9	11.6967	818.867	51.9756	608.533	17.9869	524.233	9.92981	0.640193
	St3gal1	NM_009177	261.933	3.03663	240.167	17.5926	172.167	2.46329	153.767	1.72948	0.64025
	Eif2b5	NM_172265	2906.17	58.0227	2873.1	54.0675	1778.1	94.7403	1842.33	146.474	0.641234
	Slco3a1	NM_023908	723.567	30.027	687.467	41.7351	472.967	34.324	441	33.9874	0.641485
	Oaf	NM_178644	612.467	50.7845	516.6	44.0571	363.4	14.5535	331.7	12.6686	0.642083
	Kif23	NM_024245	2317.67	98.1532	5467.07	73.861	1074.33	41.8914	3511.27	197.999	0.642258
	Mavs	NM_144888	809.667	65.9962	863.733	75.1942	542.733	32.6858	555.2	25.4724	0.642791
	Vav3	NM_146139	4159.3	89.6465	4654.33	231.547	3002.17	135.567	2993.3	160.333	0.643122
	Casp6	NM_009811	1270.9	89.7501	1151	31.7916	811.567	53.2351	740.533	45.8878	0.643382
	Msto1	NM_144898	1289.4	124.882	1120.73	72.1521	849.5	31.9301	721.167	14.5988	0.64348
	1110012J17Rik	NM_172963	1262.63	89.2007	1423.5	24.9985	900.867	40.2867	918.133	42.6337	0.644983
	Ndufab1	NM_028177	424.1	41.5928	403	27.943	242.567	8.06749	259.933	6.82943	0.644995
	Gprc5b	NM_022420	494.767	23.3188	473.4	7.80085	353.633	15.5633	305.367	20.4211	0.645051
	Cux1	NM_198602	829.867	69.6884	922.6	18.5935	593.867	41.3743	595.4	27.948	0.64535
	Slc16a13	NM_172371	273.633	8.23212	295.4	5.28488	202.233	5.01907	190.7	6.0136	0.645565
	Il13ra1	NM_133990	776.967	39.6823	793.2	24.506	587.467	14.147	512.6	27.067	0.646243
	Eef2	NM_007907	1771.83	128.131	1750.73	120.272	1193.17	116.331	1133.03	66.1504	0.647176
	Eef2	NM_007907	2507.37	170.768	2436.93	207.355	1596.3	162.771	1577.57	85.7757	0.64736
	Aim1	NM_172393	905.3	74.8838	902.3	39.5315	560.8	37.3532	584.3	8.74605	0.647567
	Papss1	NM_011863	1858.43	109.177	1837.6	140.604	1212.43	23.6215	1193.3	58.3787	0.64938
	Sigirr	NM_023059	273.667	13.4433	294.433	19.1339	170.367	5.01941	191.3	6.99452	0.649723
	Fah	NM_010176	2558.97	136.075	2281.27	134.377	1622.07	59.845	1482.5	88.4298	0.649857
	Tcfap2c	NM_009335	5917.13	304.321	6533.2	229.333	4570.53	552.897	4251.13	187.131	0.650696
	Cd109	NM_153098	326.533	23.7466	333.8	26.5519	233.6	9.26301	217.233	6.96906	0.650788
	St6galnac6	NM_016973	277.867	12.3629	248.933	12.7965	208.067	14.774	162.2	5.49454	0.651581
	Panx1	NM_019482	1505.87	107.727	1161.73	74.2161	1090.77	85.7852	757	30.8275	0.651614
	Plp2	NM_019755	1960.27	15.0334	2100.5	16.9152	1412.07	19.5436	1369.6	102.476	0.652035
	Cd53	NM_007651	186.6	5.77264	207.5	2.17025	130.367	2.33833	135.367	6.45506	0.652371
	Smox	NM_145533	577.4	33.4939	497.567	16.7394	395.867	35.3375	324.6	14.32	0.652374
	Ehd4	NM_133838	9725.83	355.072	8606.8	608.975	6397.1	417.523	5623.8	57.2661	0.653414
	Eif1a	NM_010120	4521.53	271.991	4510	270.397	3023.03	78.6931	2950.57	180.272	0.654228
	Tspan8	NM_146010	654.567	71.2183	611.467	16.6784	353.4	34.9492	401.133	46.6544	0.656017
	Cobll1	NM_177025	1402.23	35.3092	1215.73	88.6689	926.767	50.9983	797.867	22.4385	0.656286
	Eef2	NM_007907	1586.57	53.6806	1432.23	108.472	987.9	101.222	940.3	46.8091	0.656529
	Chrnb1	NM_009601	1161.73	57.0525	1323.17	55.2634	734.667	32.8664	868.833	8.27634	0.65663
	Adamts2	NM_175643	2233.53	153.177	2024.9	159.083	1911.87	83.5652	1329.67	58.8669	0.65666
	Igfbp4	NM_010517	6517.6	213.153	5572.93	87.3846	5160.27	432.232	3659.67	246.359	0.656687
	Adamtsl5	NM_025629	836.267	9.76496	715.867	36.0658	485.2	7.9019	470.267	14.9359	0.65692
	1810055E12Rik	NM_026437	398.133	33.589	336.233	29.4103	250.033	10.888	220.967	11.9781	0.657184
	Evi1	NM_007963	394.433	12.585	383.3	27.0138	262.167	7.41672	251.933	11.1679	0.657274
	-	XM_130991	1044.1	45.044	731.633	44.214	589.5	55.9742	481.7	61.4556	0.65839
	Isg20l2	NM_177663	4558.3	25.6624	4516.27	226.908	2976.13	39.387	2974.53	53.0642	0.658625
	-	NM_172531	1415.83	81.3521	1524.8	32.3036	1037.4	15.7151	1004.97	20.5229	0.659083
	Gnb1l	NM_023120	885.933	60.1849	1046.97	48.8331	547.767	28.4888	690.367	20.248	0.659395
	Mcph1	NM_173189	459.433	21.4052	792.567	23.1795	336.3	17.2239	523.1	40.4483	0.660007
	Eif2b5	NM_172265	951.8	20.6391	937.333	42.6005	574.9	52.0417	619	37.2689	0.660384
	Arpc1b	NM_023142	8201.9	294.96	7166.33	108.705	6037.5	253.539	4735.43	207.678	0.660789
	Timp1	NM_011593	6620.5	240.368	5545.3	171.769	4111.83	21.9351	3665.07	135.098	0.660933
	Cnih4	NM_030131	8050.8	420.4	9203.9	240.088	5276.43	116.387	6089.63	58.9128	0.661636
	Tdrd7	NM_146142	1006.07	12.6768	1009.07	35.2099	690.867	18.3939	668.367	23.8734	0.662359
	-	XM_131981	1142.87	73.5304	1112.67	31.5334	709.233	3.10179	737.6	29.8205	0.66291
	Lifr	NM_013584	240.867	3.30673	259	9.82446	180.867	16.8559	171.733	12.0445	0.663062
	Ccnd3	NM_007632	5467.43	222.403	4866.1	175.055	3919.2	98.4998	3229.27	210.179	0.663626
	Diablo	NM_023232	1247.73	38.939	1497.1	30.8735	954.833	10.9155	993.767	8.12616	0.663795
	Eomes	NM_010136	270.633	28.273	210.133	13.6972	138.867	5.958	139.5	9.46203	0.663865
	Metrn	NM_133719	3051.03	207.307	3008.87	47.7058	1890.3	25.1407	1998.17	89.5122	0.664093
	Foxo1	NM_019739	736.467	20.4084	815.533	39.976	455.933	32.946	541.833	43.4699	0.664391
	Arpc4	NM_026552	4545.17	190.794	4222.13	98.8946	3204	101.642	2808.8	73.1252	0.665257
	Adi1	NM_134052	2656.3	76.4849	2504.7	90.3075	1655.03	92.2519	1668.13	118.687	0.666
	Angptl2	NM_011923	415	9.9985	451.1	20.7435	301.067	3.24568	300.567	8.24304	0.666298
	Pqlc3	NM_172574	466.533	44.9709	395.533	2.72784	284.6	22.2113	263.667	14.2439	0.666612
	Zfp704	NM_133218	283.833	14.2057	310.167	20.9746	239.133	5.82132	206.767	2.00194	0.666631
	Asb8	NM_030121	2927.4	278.571	3078	103.202	1934.67	52.8372	2052.27	35.9762	0.666754
	Btbd3	NM_145534	1107.53	148.86	712.433	45.4744	654.467	36.4136	475.333	22.9334	0.667197
	Fbxo4	NM_134099	1350.2	57.3997	1116.93	17.2041	901.433	27.1129	746.267	33.4904	0.668141
	Epdr1	NM_134065	3747.2	61.4367	3407.33	202.987	2525.27	8.30549	2278.83	56.2685	0.668802
	Rnf125	NM_026301	295.533	19.6276	288	21.5168	195.3	1.61967	192.867	9.63956	0.669677
	Slco3a1	NM_023908	303.567	30.7815	289.433	10.8831	188.633	5.90377	193.833	5.81187	0.669699
	Vamp4	NM_016796	257.433	14.1862	248.467	11.1691	163.233	13.8425	166.433	11.0915	0.669839
	Cbx7	NM_144811	325.333	24.7972	421.3	28.9801	220.333	8.59076	282.233	24.664	0.66991
	4930402H24Rik	NM_029432	995.567	25.3795	981.267	10.8224	714.8	13.0656	658.867	29.0055	0.671445
	Igfbp6	NM_008344	1227.87	47.0325	935.467	17.5062	691.167	34.5968	628.133	61.8959	0.671465
	Chek2	NM_016681	276.167	10.4509	405.733	17.1804	175.367	14.3727	272.567	11.3494	0.671789
	Mtmr10	NM_172742	444.433	32.2471	403.233	16.2897	265.8	11.6316	270.933	23.2779	0.671902
	Lass2	NM_029789	9741.6	222.8	9604.27	235.537	6560.4	363.817	6457	431.638	0.672305
	Spsb4	NM_145134	1013.37	32.5307	848.867	82.2874	673.167	22.8476	570.8	13.5876	0.672426
	-	XM_355134	244.033	5.44681	283.533	10.4939	199.167	10.8668	190.767	5.29916	0.672821
	Chrnb1	NM_009601	3977.8	168.957	4398.57	270.95	2545.8	137.718	2960.5	123.919	0.67306
	Agps	NM_172666	2119.93	141.893	1981.6	96.2055	1393.8	48.9868	1336.67	134.805	0.674541
	Epha7	NM_010141	873.533	21.5388	659.467	53.2812	549.133	27.0274	445.167	32.4696	0.675041
	Pcgf6	NM_027654	1114.6	22.1802	1118.93	54.1741	843.467	61.3102	755.767	11.3211	0.675437
	-	XM_194109	1411.07	85.6538	1150.1	101.249	1116.47	56.5396	777.267	78.099	0.675826
	Eif4ebp2	NM_010124	290.6	12.3581	254.067	15.6199	189.7	9.38314	171.733	7.89458	0.675936
	Egfl7	NM_198725	2657.17	191.47	2100	219.28	1658.53	64.3027	1419.8	127.888	0.676095
	Pdgfra	NM_011058	739.333	26.2008	584.333	30.4489	494.733	43.3313	395.2	35.1321	0.676327
	Tmem126a	NM_025460	6383.8	327.052	6631.47	110.538	4582.83	317.03	4485.93	119.872	0.676461
	6330503K22Rik	NM_182995	890.967	78.9503	698.567	48.2107	589.8	13.2613	473	8.92431	0.6771
	Pitpnm2	NM_011256	715.4	40.0767	721.1	10.5788	553.433	47.2774	488.5	10.3162	0.677437
	Sfrs9	NM_025573	8665.6	364.363	7878.6	225.277	5427.33	173.792	5344.33	242.387	0.678335
	Fbxl14	NM_133940	3332.57	144.328	3904.4	181.564	2209.3	130.727	2650.07	100.911	0.678739
	Slc5a3	NM_080456	8681.63	255.479	10612.5	238.779	7120.17	437.733	7212.83	194.995	0.679654
	Coq2	NM_027978	4128.43	375.665	3991.2	178.669	2635.1	28.6308	2719.67	103.261	0.681417
	Ndufv2	NM_028388	8374.4	612.565	7725.93	352.763	5473.9	368.139	5266.87	401.079	0.681713
	Lpcat3	NM_145130	3332.93	254.72	2962.63	132.103	2267.17	110.852	2020.4	138.48	0.681962
	-	XM_132348	982.4	57.9088	1422.87	100.766	689.133	8.77579	971.033	77.8787	0.682447
	6720463M24Rik	NM_175265	542.667	16.4908	1639.6	31.9351	345.867	24.6684	1119.03	47.3729	0.682502
	Thg1l	NM_001080969	544.8	28.0643	599.933	22.1131	365.533	20.0716	409.5	27.7249	0.682576
	-	XM_129211	12872.2	162.612	13407.3	15.1333	7127	255.709	9161.97	829.94	0.683357
	Zkscan6	NM_026107	558.133	22.2861	634.367	45.4959	448.533	11.484	434.4	11.2305	0.684777
	Itga2	NM_008396	288.633	15.6689	215.567	8.90811	171.6	6.62294	147.7	4.97293	0.68517
	Glud1	NM_008133	2642	216.452	2099.27	192.298	1416.03	107.554	1438.77	47.8429	0.685367
	Casp6	NM_009811	827.267	37.7596	783.3	24.0954	568.333	15.9867	536.933	42.4549	0.685476
	Gorab	NM_178883	676.133	69.2049	636.967	39.3335	444.733	9.04882	436.867	15.7739	0.685855
	Ccnf	NM_007634	178.567	9.10391	537.333	14.0822	154.333	3.66621	368.933	6.44317	0.6866
	Btbd3	NM_145534	1126.5	105.179	704.2	48.4037	647.567	24.3363	483.533	14.6965	0.686642
	Gatc	NM_029645	1212.8	77.9921	1396.3	32.4688	888.833	40.47	959.2	86.1936	0.686958
	-	NM_183120	220.967	12.8883	272.033	14.8442	159.9	6.65307	187	5.94755	0.687417
	Papss1	NM_011863	6480.7	461.28	6228.67	425.125	4580.5	106.123	4284.33	108.702	0.68784
	Tead4	NM_011567	711.167	18.5456	540.767	12.1724	466.733	28.1422	372.233	15.321	0.688343
	Ptprn	NM_008985	270.633	5.96778	267.133	22.2863	205.4	7.38986	184.167	13.857	0.689421
	Slk	NM_009289	3161.83	270.589	2648.87	78.5131	1939.87	9.50374	1831.07	74.5063	0.691265
	Tbc1d2b	NM_194334	448.6	30.9191	398.967	15.0865	321.5	3.10484	276	14.1642	0.691787
	Depdc1b	NM_178683	151.133	1.73429	681.067	16.721	135.233	2.77629	471.467	12.9185	0.692248
	Aifm2	NM_153779	882.4	13.5537	784.433	12.0017	658.133	17.6401	543.133	29.3748	0.692389
	Hmga1	NM_016660	459.6	46.4556	469.867	14.9064	299.633	8.34692	325.4	1.85203	0.692536
	-	XM_131044	910.967	42.7185	1010.33	72.8668	642.4	40.8621	700.667	11.5482	0.693503
	Mars	NM_001003913	1114	51.1067	1286.2	58.7268	760.3	25.6798	892.667	24.6482	0.694034
	Gna11	NM_010301	1509.4	62.995	1186.77	59.6113	1082.93	47.3586	823.767	35.4833	0.694125
	H2afj	NM_177688	360.6	20.2257	306.067	24.5684	248.333	7.07327	212.467	12.1361	0.694185
	Mif4gd	NM_027162	1723.4	51.7137	1624.87	73.3074	1302.03	65.8204	1128.13	19.885	0.694289
	Lpcat3	NM_145130	2087.77	66.7337	1924.97	85.5383	1578.2	25.4537	1337.97	27.2068	0.69506
	Vps35	NM_022997	2999.13	245.395	2426.43	56.1839	1792.83	64.8605	1687.3	110.664	0.695384
	Unc119	NM_011676	424.767	21.8153	366.667	19.0844	312.267	26.5013	255.033	8.81671	0.695544
	Pqlc3	NM_172574	277.833	11.1212	248.567	11.3579	192.867	4.29509	172.933	8.80574	0.69572
	4831426I19Rik	NM_172500	589.333	16.1262	689.967	20.0293	406.067	22.6264	480.167	43.5502	0.695927
	Cerk	NM_145475	1508	106.321	1043.13	118.066	1050.2	72.8026	725.967	32.9911	0.695951
	Srd5a1	NM_175283	317.333	21.9364	431.2	15.9352	245.2	8.45064	300.1	2.96704	0.695965
	-	NM_001025613	526.933	13.1454	482.7	17.0896	386.967	6.30141	336.533	5.25907	0.697189
	Il18rap	NM_010553	622.933	7.32628	672.4	49.2164	392.3	18.9004	468.8	33.9395	0.697204
	Uaca	NM_028283	2216.17	138.314	2678.83	183.935	1365.1	24.6639	1868.1	118.782	0.697357
	Runx1	NM_009821	559.8	31.3962	813.8	74.4867	451.533	14.9037	567.867	18.571	0.697797
	Polr2d	NM_027101	1269.77	61.0192	1290.93	62.7853	847.833	44.364	901.433	29.781	0.698282
	-	NM_176995	294.4	8.75043	498.733	38.2257	226.633	19.3291	348.3	33.2004	0.69837
	Evi1	NM_007963	427.833	19.3081	406.2	29.7692	274.333	21.9746	283.767	16.9246	0.698589
	Ctdspl	NM_133710	1113.33	94.4465	804.967	40.0836	779.167	72.6426	562.433	21.2655	0.698703
	Wnt7b	NM_009528	316.167	8.65493	280.867	12.7768	200.633	8.87512	196.267	10.713	0.69879
	Lass2	NM_029789	14474.9	608.644	13039	87.1053	9188.27	279.624	9115.73	165.345	0.699113
	Pcyt1b	NM_177546	565.8	8.15925	540.533	43.6479	382.3	34.7428	378	15.6721	0.69931
	2610507B11Rik	NM_001002004	7104.67	647.153	5753.3	156.67	5041.63	57.1307	4023.67	166.879	0.699367
	Arpc1b	NM_023142	11376.6	790.368	9765.6	424.719	8050.9	669.878	6838.03	224.563	0.700216
	Ythdf3	NM_172677	1664.8	53.2095	1566.73	62.3627	1287.2	47.6511	1097.17	26.6694	0.700293
	Hao1	NM_010403	226	13.338	234.467	5.34301	145.167	7.50207	164.2	6.72632	0.700312
	Pla2g12a	NM_023196	1798.47	72.9641	1528.83	36.9794	1197.2	20.5157	1072.6	60.0136	0.701582
	Slc12a2	NM_009194	2527.77	73.0517	2452.9	166.631	1750.83	151.123	1722.43	85.9396	0.702201
	Nudt12	NM_026497	222.1	8.81986	242.267	9.72443	163.8	4.93592	170.133	8.62735	0.702254
	Prss22	NM_133731	516.633	6.24615	565.6	25.8374	359.7	29.0696	397.3	41.7848	0.70244
	Xpnpep3	NM_177310	1608.5	110.15	1692.4	35.3323	1135.73	35.2247	1189.07	62.7209	0.702594
	Nudcd3	NM_173748	274.3	6.28649	299.533	13.2296	207.533	2.87189	210.467	5.32051	0.70265
	Pi4k2b	NM_025951	1378.87	18.6366	1021.07	41.9834	826.633	22.4636	717.533	21.4754	0.702727
	Ttc39a	NM_153392	373.5	23.9357	293	13.716	267.933	13.7696	205.9	6.18088	0.70273
	Echdc2	NM_026728	1427.67	75.9017	1204.67	17.2679	1092.17	39.748	847.167	18.7931	0.703236
	Slc20a2	NM_011394	4395.63	300.948	4445.33	93.0182	3658.8	232.343	3128.27	50.6439	0.703721
	Six1	NM_009189	3918.83	195.786	5485.8	292.735	3343.2	209.22	3860.83	259.834	0.703786
	rp9	NM_018739	951.367	38.7136	766.633	21.5965	692.2	40.1778	539.7	16.4342	0.703987
	D930001I22Rik	NM_173397	1073.53	120.346	1275.77	66.5747	696.733	31.9065	899.1	68.6484	0.704751
	Rab2a	NM_021518	4798.3	99.1902	5091.47	255.778	4019.63	171.27	3600.1	129.278	0.707085
	Galm	NM_176963	494.9	21.1968	508.233	29.5412	338.433	22.1248	359.667	15.4283	0.707681
	Tubgcp4	NM_153387	526.133	32.9586	498.1	24.4623	353.6	9.88956	352.567	30.4001	0.707824
	Gas2l1	NM_144560	522.967	16.4224	516.7	7.98311	417.333	5.06634	365.8	22.3786	0.707954
	Nsmce1	NM_026330	4725.47	229.653	4877.9	239.925	3458.03	130.591	3454.9	229.031	0.708276
	Smug1	NM_027885	705.8	47.8667	778.367	39.7423	504.167	17.6675	551.4	12.1503	0.708406
	Lysmd2	NM_027309	648.6	36.6485	565.033	28.7262	461.1	15.1533	400.367	32.9366	0.708573
	Manba	NM_027288	1881.5	87.2015	1537.7	27.399	1282.33	48.0714	1091.3	41.6301	0.709696
	Eif3l	NM_145139	8754.53	244.562	8306.7	139.067	5918.33	287.095	5895.83	48.5297	0.709768
	Arpc1b	NM_023142	3889.5	88.3485	3256.97	67.8023	2789.8	108.209	2312.93	88.036	0.710148
	Ezr	NM_009510	927.333	42.7833	772.267	81.5148	616.633	5.23015	548.8	36.3693	0.710635
	Map3k6	NM_016693	292.4	15.4872	248.8	18.4814	183.967	8.67993	176.867	8.55752	0.71088
	Cox6b1	NM_025628	8965.5	426.831	9140.5	361.55	6608	280.841	6501	201.45	0.71123
	Slc14a1	NM_028122	162.267	0.338296	192.6	8.29478	121.7	3.64737	137.1	6.61236	0.711838
	Vps54	NM_139061	1143.97	68.1473	1112.73	14.4999	803.533	46.0773	792.733	40.8624	0.712422
	Vangl1	NM_177545	271.733	10.2131	449.133	7.55542	235.067	6.90032	320.033	22.633	0.712557
	Slmap	NM_032008	3048.57	107.56	3294.8	73.8821	2309.63	123.428	2349.13	123.082	0.712981
	Dtnb	NM_007886	418.767	14.4916	396	17.5261	298.967	31.6124	282.833	16.5391	0.714225
	Pfkm	NM_021514	2992.33	199.659	2414.83	148.263	2308.03	106.577	1725.87	170.161	0.714696
	Igf2bp2	NM_183029	6407.07	78.3333	6109.83	185.293	4822.77	190.469	4367.83	134.801	0.714886
	Rai14	NM_030690	5964.07	340.327	5626.17	310.06	4296.1	164.283	4023.9	42.2764	0.715211
	Slk	NM_009289	3253.53	120.759	2659.2	152.586	1985.47	71.0386	1902.2	8.1525	0.715328
	-	XM_125952	3016.07	252.896	3245.57	14.4599	1935.77	40.8807	2322.5	108.369	0.715591
	C79407	NM_172578	279.333	11.9742	1217.2	97.8513	234.833	14.2022	871.467	34.2523	0.71596
	Socs6	NM_018821	1067.8	78.3751	929.067	43.0089	728.533	42.024	665.6	44.4204	0.716418
	Rem2	NM_080726	2505.27	220.967	2194.6	122.072	1831	45.5829	1572.4	71.6789	0.716486
	Ssfa2	NM_080558	3111.73	90.3874	2325.57	68.2181	2049.97	44.9014	1666.63	44.9869	0.716654
	Mpv17	NM_008622	605.667	9.24794	550.1	29.2509	429.7	13.3665	394.367	21.9971	0.716901
	Igfbp4	NM_010517	9008.93	104.73	7768.23	123.38	7197.83	368.955	5573.8	56.3557	0.717512
	Clcf1	NM_019952	282.7	18.4293	252.433	3.26309	197.767	1.44952	181.233	5.01476	0.717945
	Tsen2	NM_199033	762.033	51.1822	994.733	56.3241	635.867	34.304	715.467	18.3012	0.719255
	Aig1	NM_025446	289.367	21.1607	254.567	15.2524	208.2	14.4417	183.1	6.48254	0.719261
	Chek2	NM_016681	257.267	9.96232	327.1	14.1743	196.733	5.38186	235.3	18.0408	0.719352
	Ccdc75	NM_181649	242.433	17.3671	235.933	2.49154	199.533	3.99847	169.733	3.84592	0.719412
	Ccdc127	NM_024201	1461.07	14.6853	1282.1	28.9421	1069.1	40.9874	922.933	46.3921	0.71986
	Stt3a	NM_008408	832.8	33.2374	869.133	56.1578	645.833	18.5768	625.867	14.4562	0.720105
	Agps	NM_172666	1411.5	105.205	1288	48.9602	876.567	28.1409	927.6	56.9822	0.720186
	Syngr2	NM_009304	598.767	22.0926	476.467	34.6353	373.933	19.1197	343.733	10.1195	0.72142
	D2Ertd750e	NM_026412	1292.2	46.055	2462.63	109.242	755.533	41.3207	1778.1	71.5794	0.722033
	Tubb2c	NM_146116	11626.5	348.485	22298.1	856.721	6892.17	243.487	16100.4	619.423	0.722053
	Tpbg	NM_011627	7127.27	156.65	6611.73	179.346	5163.17	110.261	4774.77	121.248	0.722167
	Mpv17	NM_008622	375.833	5.87717	370.433	4.93198	282.767	19.4917	267.7	4.87476	0.722668
	Ssx2ip	NM_138744	1003.5	39.6095	926.367	51.7751	695.867	24.0479	669.667	48.5724	0.722896
	Keap1	NM_016679	1903.1	76.8635	2193.57	111.429	1574.87	81.768	1586	65.9952	0.723022
	-	NM_008662	2007.5	16.4992	1631.8	134.807	1368.4	43.9519	1180.27	23.7049	0.723293
	Ublcp1	NM_024475	2585.5	78.4978	3199.8	234.797	2022.07	70.2132	2314.47	156.076	0.723317
	Adamts2	NM_175643	1466.1	61.0063	1219.63	101.001	1216.6	6.86367	882.2	5.40093	0.723334
	Lpar3	NM_022983	477.467	9.52651	487.967	20.2007	363.767	22.9024	353	8.70019	0.72341
	C79407	NM_172578	340.767	17.8066	1324.53	102.229	268.2	27.1605	958.233	21.4633	0.723451
	Rangrf	NM_021329	1529.73	85.8206	1733.7	66.756	1106.07	48.9941	1254.8	60.1003	0.72377
	Adam8	NM_007403	233.5	8.90917	240.1	15.3024	171.133	5.01143	173.9	9.37923	0.724282
	Spr	NM_011467	817.933	38.8429	765.467	39.3762	645.667	16.4532	554.8	27.775	0.724786
	Arpc1a	NM_019767	3291.43	212.979	2823.3	45.2	2566.57	64.2024	2046.4	70.8573	0.724826
	Tcf7	NM_009331	501.5	45.2794	401.567	7.56446	336.567	7.41942	291.133	4.30865	0.724992
	Slc12a2	NM_009194	7538.1	366.89	7591.63	177.892	5736.23	151.948	5503.9	309.872	0.724996
	Spry3	NM_001030293	236.533	7.13263	385.467	17.6545	207.533	4.61892	279.5	6.33114	0.725094
	Sav1	NM_022028	4375.2	142.24	4477.8	88.7398	3029.97	130.702	3247.53	131.923	0.725251
	Unc119	NM_011676	695.2	41.7761	644.967	19.2156	531.233	18.8715	467.767	34.9201	0.725257
	Irak1	NM_008363	449.567	20.2469	384.033	4.20648	313.667	17.1847	278.733	8.57153	0.725805
	Adcy2	NM_153534	523.8	15.1064	459.967	24.7922	440.1	36.0771	333.867	4.32139	0.72585
	Cenph	NM_021886	901.267	81.4805	1271.93	106.479	662.067	50.0944	923.333	30.4336	0.725931
	Mtf2	NM_013827	451.1	21.1557	516.7	35.1848	344.067	8.27392	375.167	12.8388	0.726083
	Dolpp1	NM_020329	2230.3	34.3681	2195.5	83.141	1584.8	131.444	1595.2	58.6005	0.726577
	Ubl4	NM_145405	910.067	21.6218	943.3	25.6913	724.8	13.4188	685.4	32.12	0.726598
	Sergef	NM_013789	297.467	11.8054	342.8	25.8261	227.2	13.4942	249.233	7.1669	0.727051
	Mtmr14	NM_026849	2735.4	85.1205	3477.13	171.193	2248.1	51.1264	2529.43	35.3054	0.727448
	Pcdh17	NM_001013753	4941.87	182.566	4221.3	124.061	3586.1	134.663	3073.2	229.065	0.728022
	Tshz3	NM_172298	578.333	30.1856	549.267	3.90484	498.9	34.0718	399.9	20.644	0.728061
	Exod1	NM_027698	278.867	9.57868	522.367	26.4922	210.233	15.2719	380.433	11.5277	0.728287
	Ikbkb	NM_010546	414.333	13.5758	414.067	10.9243	335.667	14.3565	301.633	8.28781	0.728464
	Smox	NM_145533	437.167	21.2471	403.967	10.8201	338.267	4.33064	294.5	14.9614	0.72902
	Manba	NM_027288	566.467	7.68469	513.8	35.8832	404.2	21.0473	374.867	26.6819	0.729597
	Stac2	NM_146028	1769.03	40.5401	1560.03	102.577	1348.67	48.4299	1138.33	18.1683	0.729685
	Carm1	NM_021531	482.367	2.1458	467	11.8424	325.233	7.13894	340.833	1.52133	0.729835
	Adcy7	NM_001037723	629.7	55.5188	559.033	17.3798	467.8	13.6771	408.2	18.5954	0.730189
	Mrp63	NM_026401	252.133	9.31975	277.1	7.74855	191	12.9624	202.367	8.22685	0.730303
	Sema6d	NM_172537	194.4	7.53945	165.233	6.37635	141.667	4.47002	120.7	1.26623	0.730484
	Syngr2	NM_009304	541.5	28.368	393.233	25.6146	334.233	23.3888	287.333	17.8979	0.730694
	Adh7	NM_009626	5246.1	307.758	5958.4	348.119	3665.1	233.257	4353.8	219.624	0.7307
	-	NM_198632	337.167	22.0554	309.633	11.161	259.433	16.3431	226.267	6.37504	0.730759
	Mmd	NM_026178	7438.67	177.376	6680.4	119.513	5347.77	58.1453	4884.9	167.444	0.731229
	Cenpn	NM_028131	1265.03	40.148	2793.4	219.794	905.7	20.114	2042.97	107.499	0.731356
	Spred1	NM_033524	1980.8	68.3269	1925.03	53.4164	1468.17	45.8162	1408.3	49.1451	0.731573
	Pacsin2	NM_011862	1017.7	60.0865	1002.3	57.2937	714	14.1418	733.533	57.469	0.73185
	Anln	NM_028390	5760.13	203.608	11192.9	469.055	3243.33	115.56	8197.77	102.97	0.732408
	Rad18	NM_021385	1109.63	94.5443	1866.93	130.394	803.333	76.2351	1367.6	72.634	0.73254
	Pqlc3	NM_172574	232.4	15.4856	205.933	0.819214	161.9	9.31146	150.867	4.98877	0.732602
	Cd109	NM_153098	328.833	24.9087	296.133	9.05176	211.833	5.86013	217.067	15.7772	0.733005
	-	NM_020295	129.467	1.52133	155.833	7.21257	104.333	3.91975	114.267	5.393	0.733266
	Dok1	NM_010070	448.967	16.9337	399.367	21.5206	300.7	12.9662	292.9	9.88197	0.733411
	Pvrl3	NM_021495	1817.57	82.9358	1567.9	3.36204	1187.6	31.866	1149.93	69.6479	0.73342
	Csrnp1	NM_153287	947.567	27.2471	871.367	38.4682	787.867	20.8794	639.3	48.5545	0.733675
	Gtpbp3	NM_032544	1591.13	57.9259	1603.17	85.6606	1004.6	38.3261	1176.3	57.4521	0.733734
	Slc14a1	NM_028122	137.467	3.12481	166.3	7.75973	115.767	4.35214	122.267	7.01435	0.735219
	Lamp2	NM_010685	8008.5	173.859	7250.53	287.575	6148.7	192.107	5332.13	145.261	0.735412
	Cox6b1	NM_025628	11666.6	273.083	11916.1	310.756	9362.43	494.738	8770.33	39.1199	0.736007
	Imp3	NM_133976	4987.33	90.1808	4803.3	193.645	3869.87	31.9834	3536.43	270.261	0.73625
	Rasa2	NM_053268	754.867	32.8429	703.1	34.3337	529.433	17.867	518.333	31.9484	0.737211
	Wipi1	NM_145940	1321.97	57.2572	1103.53	81.1241	995.1	46.2153	813.6	29.2235	0.73727
	Lass2	NM_029789	26304.8	496.219	25350.6	1359.63	18950.8	1076.2	18692.7	355.803	0.737367
	Epor	NM_010149	227.167	4.10298	230.5	13.2605	167.1	5.22015	169.967	3.03882	0.737384
	Cenpn	NM_028131	614.9	46.7426	1333.43	69.942	474.067	6.07737	983.4	30.4602	0.737497
	Lpar3	NM_022983	407.167	16.8636	428.367	17.9875	314.267	13.3029	316.067	18.8326	0.737842
	Ddx18	NM_025860	5854.3	28.4026	5882.43	134.711	4134.33	200.519	4342.57	148.286	0.738227
	Znhit2	NM_013859	1200.23	44.5934	1154.37	57.0877	927.967	54.4799	852.6	11.514	0.738585
	Odf2	NM_013615	299.967	10.6041	392.167	21.9165	224.567	7.4776	289.733	11.6071	0.7388
	Ptpn12	NM_011203	2305.4	91.9721	2257.67	41.0581	1695.07	73.5309	1668.27	133.854	0.738934
	Galk1	NM_016905	2664.23	112.94	2535.83	150.671	2023.23	95.5275	1873.93	50.2932	0.738981
	Ino80c	NM_172625	733.367	49.4694	754.967	36.6163	467	15.8926	558.267	21.0905	0.739459
	Dhrs7	NM_025522	1479.13	97.5555	1393.87	30.3215	1087.13	50.173	1030.93	51.5876	0.739617
	Lss	NM_146006	2120.87	68.686	1943.67	57.3979	1512.33	105.22	1438.23	32.4859	0.739956
	Dusp11	NM_028099	3186.47	31.1161	3801.47	113.937	2466.7	55.0051	2813.2	23.1314	0.74003
	Cobll1	NM_177025	1947.07	21.498	1682.1	89.7932	1350.27	64.4814	1245.07	49.391	0.740188
	1110018J18Rik	NM_025370	192.967	4.60953	210.667	9.61411	157.933	8.07658	156.133	7.83291	0.741136
	Gzme	NM_010372	203.8	2.30651	227.733	9.94055	182.067	5.25748	168.867	3.25184	0.741513
	Lmna	NM_019390	15149.5	536.684	14739.8	482.2	11484.3	685.149	10938.8	311.474	0.742127
	Mtmr11	NM_181409	1458.33	38.7949	1337.17	28.4468	1021.1	46.8974	992.567	38.8242	0.742289
	Arf6	NM_007481	4408.63	216.196	5032.4	77.8441	3063.17	84.5077	3737.8	48.9921	0.742747
	Dcps	NM_027030	794.1	22.0303	928.433	32.6204	648.9	5.469	689.6	19.1844	0.742757
	Smox	NM_145533	252.633	8.95848	226.967	10.5435	170.033	6.90998	168.6	9.61405	0.742839
	Upk1b	NM_178924	238.8	17.4603	207.467	3.36171	160.7	10.0593	154.267	11.7635	0.743574
	Agpat3	NM_053014	853.833	39.9906	795.2	49.7837	709.1	17.4897	591.533	22.622	0.74388
	Flii	NM_022009	1343.7	29.2548	1188.57	41.4277	1141.77	44.5945	884.333	19.0134	0.744031
	Rpl27a	NM_011975	4366.67	147.733	4294.73	196.937	3540.8	100.298	3195.73	122.852	0.744105
	Mtx1	NM_013604	3935.47	119.592	4488.73	54.3892	2762.27	117.297	3343	109.144	0.744754
	-	XM_355213	224.6	13.4448	209.567	7.38474	172.067	7.84694	156.1	10.5674	0.744869
	Impa2	NM_053261	311.533	20.0425	245.033	1.14649	195.933	6.2336	182.533	4.44385	0.744932
	Rnf141	NM_025999	281.9	11.6337	299.933	9.69885	190.967	6.78167	223.733	4.50642	0.745943
	Fam69b	NM_019833	376.4	24.1758	309.3	4.94402	268.733	11.3347	230.833	12.6229	0.746308
	Pml	NM_008884	1020.67	40.3193	910.833	38.6674	770.1	13.0885	680.233	43.0966	0.746825
	Ccdc127	NM_024201	2171.9	17.0036	1891.53	55.1697	1589.07	61.3234	1413.03	14.4472	0.74703
	Ramp3	NM_019511	152.433	7.99674	177.233	5.47246	126.033	0.933333	132.4	5.31256	0.747039
	Nkx2-5	NM_008700	1209.67	51.1977	1415.63	89.1065	973.2	15.3709	1057.7	37.2403	0.747159
	Nupl1	NM_170591	636.4	32.381	576.2	29.6894	447.2	14.9703	430.567	29.7773	0.747253
	Nup160	NM_021512	2936.17	32.784	3728.63	134.354	1919.27	114.306	2786.23	159.142	0.747253
	Mto1	NM_026658	522.2	24.2079	532.167	12.4248	397.233	15.0118	397.767	18.0289	0.747448
	Upp1	NM_009477	184.167	6.15747	179.033	14.4811	136.167	4.84779	133.833	4.43672	0.747533
	Nucb1	NM_008749	2602.57	97.4589	2299.67	107.606	1950.8	89.7343	1719.13	34.5761	0.747555
	Setd7	NM_080793	296.267	6.95374	292.8	8.44354	232.8	5.90931	218.9	7.13466	0.747609
	Tk1	NM_009387	2371.13	118.97	3494.03	228.593	1701.8	84.522	2612.73	249.512	0.74777
	rp9	NM_018739	1270.07	69.9403	877.9	46.743	907.633	55.9926	657	13.1264	0.748377
	St3gal6	NM_018784	688.5	63.4421	623.067	11.7553	420.767	35.1002	466.433	34.8615	0.748608
	Ank1	NM_031158	285.467	12.9582	284.5	13.7219	218.133	7.04281	213	2.94618	0.748682
	Glud1	NM_008133	362.3	6.50922	337.267	17.917	260.467	11.2191	252.533	8.96741	0.748763
	Tkt	NM_009388	5357	147.332	4453	179.749	4145.63	411.186	3334.3	166.338	0.748776
	Thsd4	NM_172444	377.967	20.7979	447.433	16.8785	310	25.8798	335.033	8.92381	0.748789
	Rbl1	NM_011249	603.4	6.08714	1191.9	21.4854	457.633	2.36807	892.667	11.5983	0.748945
	Stard3nl	NM_024270	1219.9	73.292	1189.53	39.1921	895.933	23.4724	891.767	58.9456	0.74968
	Npnt	NM_033525	235	8.63848	222.6	7.17565	160.767	4.51823	166.967	16.0701	0.750076
	Sil1	NM_030749	297.467	7.92156	348.1	9.50018	227.033	8.36707	261.233	5.43026	0.750454
	Aof1	NM_172262	838.833	35.487	635.667	24.8321	607	25.9501	477.233	13.0193	0.750759
	D2Ertd750e	NM_026412	444.633	21.0845	844.2	62.6915	291.733	25.022	633.833	24.2755	0.750809
	Rgs17	NM_019958	1495.03	14.5708	1216.5	52.2462	977	72.8802	913.467	70.6696	0.750898
	Ranbp9	NM_019930	1404.9	35.9007	1360.67	25.5547	1069.93	53.2685	1022.17	49.6091	0.751225
	Gpr137b	NM_031999	828.9	24.4933	648.467	25.831	536.067	21.092	487.267	42.592	0.751414
	Unc119b	NM_175352	3217.8	195.323	3121.23	16.2313	2520.23	82.1626	2345.6	97.7479	0.751499
	Sgsm2	NM_197943	357.567	27.9066	278.567	10.2933	240.667	6.48648	209.367	5.66284	0.751586
	Slc39a14	NM_144808	222.733	9.42591	233.233	3.84419	167.767	10.011	175.333	4.34447	0.75175
	Ube3b	NM_054093	1301.53	32.931	1165.7	37.143	988.7	60.3676	876.733	48.2539	0.752109
	Tpd52	NM_009412	4528.13	149.365	3994.7	53.6658	3256.23	145.513	3006.53	100.259	0.75263
	1110067D22Rik	NM_173752	426.133	12.6125	362.7	14.3584	321.533	22.5791	273	13.2122	0.752688
	Slc5a6	NM_177870	1909.6	102.758	2020.2	113.657	1413.53	32.3352	1522.33	38.3035	0.753554
	Me2	NM_145494	535.1	20.8979	514.7	23.6342	376.467	18.5422	387.9	20.0978	0.753643
	Rab8b	NM_173413	2368.17	76.1545	2493.67	205.177	1665.53	28.4121	1880.27	91.1903	0.754017
	Kif15	NM_010620	782.433	35.1193	1399.43	145.971	493.5	17.1097	1055.2	10.429	0.754021
	Cdc25b	NM_023117	254.7	10.1129	830.7	39.9252	171.733	9.47072	626.367	34.6838	0.754023
	Zswim1	NM_028028	660.9	7.40698	721.9	27.9933	550.1	38.7276	544.467	5.65459	0.754214
	Cd44	NM_001039150	4123.47	227.811	4179.57	230.198	2878.03	113.47	3153.93	196.741	0.754606
	Dusp7	NM_153459	2837.37	81.3163	3001.93	69.3881	2156.57	159.198	2265.87	62.3303	0.754804
	Nab1	NM_008667	352.567	12.0679	282.667	12.1251	228.233	8.82314	213.367	2.11371	0.754835
	Ints7	NM_178632	1378.4	34.1828	1132.13	17.9126	1012.8	28.0716	854.633	36.7843	0.754889
	-	NM_133821	448.833	34.3547	443.867	23.3464	313.367	11.9226	335.2	12.5607	0.755181
	Phf17	NM_172303	264.9	16.6842	253.733	8.34712	222.967	8.46686	191.733	5.1174	0.755649
	Lamp2	NM_010685	9782.2	155.252	8944.87	660.495	8023.13	120.865	6759.33	444.158	0.755666
	Ptp4a2	NM_008974	1377.8	28.2883	1136.97	115.676	1011.53	46.9436	859.3	55.292	0.755781
	Ipo5	NM_023579	3244.23	240.266	2961.53	93.5737	2223.37	113.938	2239.17	141.27	0.756086
	Lass5	NM_028015	3180.6	274.961	2906.9	82.2162	2331.07	86.9	2198.1	32.8853	0.756166
	-	XM_134171	860.067	21.6463	705.533	10.3044	619.133	30.7822	533.533	13.6335	0.756213
	Dcun1d4	NM_178896	363.6	10.6814	341.733	7.28522	282.8	22.1621	258.6	7.14213	0.756731
	Ankrd56	NM_175270	341.1	5.00899	293.933	15.3084	234.133	18.9607	222.6	9.27434	0.757315
	Rad17	NM_001044371	1335.97	23.9125	1494.4	60.8783	1061.93	25.1001	1132.47	33.1229	0.757809
	Fbxo16	NM_015795	304.467	9.08063	375.467	27.2948	233.033	12.53	284.6	11.3024	0.757989
	Cd9	NM_007657	11761.1	333.384	12356.8	394.527	9321.8	173.302	9368.2	232.203	0.758141
	Ran	NM_009391	1588.6	59.5878	1595.5	77.0152	1063.97	35.2481	1210.07	43.7049	0.758427
	Capn7	NM_009796	837.333	20.3505	796.6	13.0541	682.033	28.7176	604.2	16.7004	0.758474
	Dhrs7b	NM_145428	619.267	14.1958	759.733	37.9185	466.767	11.7787	576.533	32.0578	0.758863
	Aof1	NM_172262	246.9	5.0362	222.1	12.0652	212.8	9.22298	168.6	2.28546	0.759118
	Ddx51	NM_027156	1947.07	33.5495	1941.37	42.3905	1454.77	90.3019	1474.47	30.7144	0.7595
	Prodh	NM_011172	168.333	6.98435	183.267	7.47046	144.6	6.67108	139.233	3.69203	0.759728
	Smek2	NM_134034	2649.87	78.9186	3017.6	78.7998	2097.97	121.349	2293.87	110.937	0.760164
	Atp6v0d1	NM_013477	3151.2	56.1437	2651.13	89.0184	2527.73	60.7448	2016.2	159.928	0.760506
	Polr2d	NM_027002	847.5	11.9438	917.333	30.4629	647.867	38.2938	697.9	22.1786	0.760792
	Trp53bp2	NM_173378	417.067	11.4819	406.733	13.4693	343.267	17.9557	309.633	8.77389	0.761268
	Msh6	NM_010830	6652.27	354.136	2843	121.287	4428.77	70.8956	2165.77	143.008	0.76179
	Eif3l	NM_145139	16056.8	350	14768.5	373.575	10892.6	306.378	11254.6	514.244	0.762068
	Orai1	NM_175423	480.833	21.707	518.2	16.1599	370.133	12.4994	395.033	22.8813	0.762318
	Dhrs7b	NM_145428	2720.17	124.739	3479.9	84.7762	1987.8	73.0345	2653.73	154.941	0.762588
	2900024O10Rik	NM_028372	180.033	2.36807	159.667	3.24568	140.033	10.7885	121.767	1.61486	0.762631
	Maff	NM_010755	328.9	12.4808	312.133	8.54894	266.8	1.70392	238.167	7.57393	0.763031
	2010005J08Rik	NM_178623	372.033	11.4578	341.5	13.4656	273.167	18.9942	261.033	15.1343	0.764372
	Npepl1	NM_213733	1712.17	80.314	1701.3	31.9547	1508.93	35.7962	1300.97	14.4003	0.764692
	Slc25a24	NM_172685	3089.03	188.383	3018.03	40.791	2221.63	103.77	2308.33	47.9514	0.764847
	Peli2	NM_033602	275.9	3.72693	255.7	4.71487	195.467	13.06	195.667	8.47827	0.765221
	Cstf2	NM_133196	3780.43	102.992	3590.5	120.827	3123.07	147.64	2748.83	22.0448	0.765584
	Mta3	NM_054082	1326.43	96.1077	1068.03	53.2668	1032.53	23.8054	818.1	46.7143	0.76599
	Nfatc1	NM_198429	255.833	1.61795	272.9	8.00687	230.033	10.5142	209.067	6.6273	0.766094
	St6galnac6	NM_016973	185.1	2.92973	177.3	3.95517	153.1	8.91198	135.833	4.54252	0.76612
	Vti1a	NM_016862	253.9	12.9867	406.7	35.0081	243.033	10.6603	311.633	13.8493	0.766248
	Stard7	NM_139308	1541.57	105.14	1174.23	38.5529	1022.1	70.4927	900.6	49.8905	0.766971
	-	NR_003107	427.6	14.8758	543.367	13.4051	366.033	4.63765	416.767	13.8316	0.767008
	Flad1	NM_177041	844.233	15.2615	786.367	26.3024	729.067	31.7835	603.367	13.3677	0.767284
	-	NM_175108	311.833	7.61453	320.833	13.6731	237.333	3.04704	246.267	20.3164	0.767586
	Bahcc1	NM_198423	772.533	40.4134	935.667	22.8544	723.533	32.0496	718.5	3.19531	0.767901
	Srpk1	NM_016795	2721.47	126.702	2384.27	148.924	2081.37	11.2482	1832.07	34.3317	0.768399
	Ramp3	NM_019511	127.567	2.09868	143.5	3.04138	120.267	6.50777	110.267	3.83898	0.768411
	Ctnnal1	NM_018761	2177.63	103.015	1609.27	72.9208	1611.37	71.9529	1236.77	30.663	0.768529
	Adcy7	NM_007406	213.9	8.66391	206.3	9.31826	168.467	5.03201	158.567	7.75464	0.768623
	Cul1	NM_012042	3887.13	30.6467	3271.57	103.929	3041	69.5951	2514.97	172.705	0.768735
	Fam132a	NM_026125	457.1	21.4035	369.467	3.12748	333.9	27.0711	284.133	13.1841	0.769035
	Krt19	NM_008471	210.467	14.0477	190.233	8.0269	147.167	5.22345	146.3	6.58584	0.769057
	Ankrd17	NM_198010	215.633	15.3421	216.267	5.09913	165.733	2.8591	166.4	6.18789	0.769419
	Riok3	NM_024182	1433.07	65.0446	1243.97	29.4802	1109.07	46.7577	957.8	39.3336	0.769954
	Gsg2	NM_010353	453.2	26.6421	981.133	65.5164	325.167	4.3129	755.467	36.5568	0.769994
	Tssc1	NM_201357	372.8	9.45992	404.2	1.22202	326.7	13.7438	311.233	2.1881	0.769998
	Nadk	NM_138671	4928.53	165.805	4335.07	95.6995	3769.93	65.1957	3338.67	158.751	0.770154
	Fignl1	NM_021891	1630.53	33.5302	1847.6	73.3118	1121.57	56.1769	1423.33	12.8271	0.770367
	Slc25a32	NM_172402	557.3	15.2004	478.1	27.4908	413.033	6.7888	368.4	9.03549	0.77055
	Sord	NM_146126	505.233	20.7442	434.033	14.5957	341.067	12.3264	334.633	2.96723	0.770985
	Tmed10	NM_026775	2839.93	122.084	3115.9	139.051	2238.4	51.5931	2402.57	117.905	0.771068
	Snx21	NM_133924	905.333	35.9421	865.233	19.367	672.233	28.4953	667.367	14.4155	0.771315
	Mnd1	NM_029797	1225.7	101.804	1977.6	155.343	904.6	39.2695	1525.37	32.4507	0.771324
	Mapk9	NM_207692	778.8	25.8666	747.2	5.07182	661.267	24.315	576.5	33.3145	0.771547
	Slc25a39	NM_026542	1103.27	15.7937	987.867	36.7344	809.533	52.8031	762.667	40.4833	0.772034
	Prkag2	NM_145401	812.8	27.2786	823.233	35.205	603.933	35.557	636.233	32.2441	0.772847
	Jmjd5	NM_029842	420.767	12.9474	476.067	21.0661	355.3	21.2665	368.167	6.12599	0.773351
	Rnpepl1	NM_181405	3486.2	67.8136	2728.67	106.972	2581.5	197.352	2110.43	190.047	0.773428
	4833418A01Rik	NM_198005	460.533	16.8519	480.267	11.0912	348.5	26.2001	371.767	15.9391	0.774084
	Tmem85	NM_026519	5924.5	245.8	5814	228.9	4501.27	27.4676	4501.07	262.531	0.774178
	Gldc	NM_138595	184.1	2.76466	192.233	2.53004	153.167	11.8404	148.933	4.90793	0.774753
	Sult2b1	NM_017465	220.3	6.27455	219.267	3.12641	170.833	1.07445	169.967	0.600925	0.77516
	Gemin4	NM_177367	1892.53	133.782	2068.47	26.8946	1427.77	55.2683	1603.67	61.9786	0.775293
	Cyfip1	NM_011370	645.367	31.6276	641.067	8.23333	481.267	33.9201	497.033	29.833	0.775321
	Ppa2	NM_146141	1507.27	38.764	1772.13	25.7533	1255.03	24.8667	1374.63	66.2626	0.775694
	1600012H06Rik	NM_026451	621.5	10.4083	667.567	14.5057	504.267	6.48597	517.867	13.8744	0.775753
	Gzme	NM_010373	261.733	5.57863	263.233	7.46041	189.233	10.2348	204.233	15.2955	0.775864
	Nanos1	NM_178421	697.533	29.8476	369.233	16.9321	457.267	11.6082	286.5	10.9865	0.775933
	Hsd17b10	NM_016763	3975.83	222.218	3417.5	105.438	3256.67	83.5815	2652.03	105.139	0.776015
	Cpne2	NM_153507	1423.93	27.8193	1203.53	15.7476	1176.73	85.2251	934.167	14.617	0.776189
	Iqgap3	NM_001033484	392.033	16.9228	876.267	40.5468	286.133	13.9358	680.2	20.851	0.776247
	Map2k4	NM_009157	2343.5	6.30423	2503.03	120.909	1827.33	43.5529	1944	46.9454	0.776659
	Rom1	NM_009073	371.467	18.3958	314.167	4.93772	270.767	2.19418	244.167	2.4127	0.777189
	Plac9	NM_207229	213.567	3.68887	234.167	5.79665	169.867	4.08262	182.1	6.30423	0.77765
	Lrwd1	NM_027891	844.7	53.1669	1150.53	70.7462	677.6	19.8243	894.8	46.115	0.777729
	Man1a2	NM_010763	1047.6	41.2033	831.567	76.0453	733.867	27.3868	646.8	61.3883	0.777809
	Fam110c	NM_027828	147.533	6.77602	160.1	5.62968	130.967	2.87537	124.533	3.83377	0.777845
	Birc5	NM_009689	1712.07	59.2373	4294.6	108.604	1246.2	46.022	3344.33	49.8756	0.778729
	Pnkp	NM_021549	518.067	32.9366	675.933	27.0129	479.3	16.8298	526.433	10.8913	0.778824
	Bend3	NM_199028	275.967	3.88215	282	7.5798	208.567	11.5969	219.733	8.33173	0.779195
	Capn1	NM_007600	1079.7	15.2893	864.767	11.9646	791.033	32.668	674.067	20.7215	0.779478
	Gorasp2	NM_027352	5536.07	84.6539	5670.6	25.3583	4336.13	261.707	4422	370.515	0.779812
	Msrb2	NM_029619	223.367	8.53118	203.7	5.78187	190.667	6.28817	158.867	7.08645	0.779907
	Ccdc41	NM_029852	1214.87	37.1082	1092.23	6.90032	820.1	53.2634	851.9	49.8564	0.779964
	Rhod	NM_007485	281.6	10.429	277.8	5.50757	235.5	14.4876	216.7	8.91422	0.780058
	Ppp4r1	NM_146081	1304.03	61.7302	1145.8	54.4517	974.633	27.1472	893.867	27.4855	0.780125
	Fbxo21	NM_145564	368.733	15.3712	264.933	8.15196	286.667	4.23058	206.733	6.23601	0.780322
	Birc5	NM_009689	1099.13	74.361	2708.93	131.861	738.9	19.3856	2114.07	30.9219	0.780408
	Fnta	NM_008033	6174.33	230.997	5730.17	253.059	5022.57	82.5273	4472.6	14.1446	0.780535
	Acot7	NM_133348	716.433	40.3617	828.333	38.383	602	24.3006	646.667	15.799	0.780685
	Fam120b	NM_024203	410.033	8.42938	500	30.36	337.267	2.45787	390.533	21.5976	0.781066
	Tex10	NM_172304	671.1	9.01499	710	32.5781	537.9	10.2919	554.733	15.3896	0.781314
	Tiam1	NM_009384	834.833	30.4565	810.933	18.2758	580.267	29.1819	633.6	52.2311	0.781322
	Uba3	NM_011666	2610.9	81.4479	2546.47	56.2056	1875.27	15.902	1991.23	71.8192	0.781957
	Gltp	NM_019821	2040.77	43.7905	1885.03	53.9632	1419.67	65.8018	1474.2	38.3031	0.782057
	Tmem201	NM_177672	1032.7	64.8756	812.967	20.5527	828.3	31.3696	636.267	47.9939	0.782648
	Ube3b	NM_054093	3179.1	70.2947	2780.8	92.1578	2398.27	152.781	2177.87	91.8235	0.783181
	Slc35a4	NM_026404	3148.9	115.121	3385.6	175.899	2242.37	20.327	2652.2	91.71	0.783377
	4632417K18Rik	NM_026640	2031.83	34.4146	1756.27	110.764	1580.27	85.0724	1376.1	71.3797	0.783536
	Pvrl1	NM_021424	249.2	14.9734	211.133	9.41671	187.767	9.26235	165.433	3.63975	0.783549
	-	XM_132806	1147.7	83.6108	1364.47	63.9051	827.9	30.496	1069.63	31.9302	0.783916
	Tubb2b	NM_023716	4978.77	235.623	8080.67	534.504	3926.2	21.2798	6335.1	148.618	0.783982
	Nupl1	NM_170591	926.167	36.1443	803.233	64.3066	630.833	28.3872	629.867	36.1577	0.784165
	Mak16	NM_026453	3120.53	104.724	3528.67	97.6137	2714.83	22.1872	2767.47	93.6898	0.784281
	-	XM_126658	599.467	8.57367	704.9	24.2761	536.667	18.0667	552.933	14.6317	0.784413
	Gale	NM_178389	733.767	16.6345	681.367	38.2511	636.667	28.5691	534.633	14.2391	0.784648
	Ywhaq	NM_011739	7428.1	235.322	6406.2	489.078	5286.2	229.671	5033	229.612	0.785645
	Znrf2	NM_199143	2147.77	107.472	1856.97	47.4916	1356.97	96.575	1459.5	59.5483	0.785958
	Kif22	NM_145588	1493.4	40.0573	4105.5	159.919	1002.13	67.7921	3227.57	110.954	0.786158
	Pvrl3	NM_021496	686.7	33.2592	639.1	17.9209	529.233	12.0023	502.533	16.644	0.786314
	Sptlc1	NM_009269	2518.57	79.1591	2841.57	65.3415	2097.37	47.0786	2234.83	71.2825	0.786477
	Ptp4a2	NM_008974	1139.67	44.1384	971.767	75.6937	844.933	23.9626	765.1	19.8245	0.787329
	Limd1	NM_013860	958.533	61.1464	817.5	22.8739	683.4	29.9977	643.9	30.5563	0.787645
	4732471D19Rik	NM_176987	662.633	16.0509	589.867	1.79475	522.667	29.3283	464.8	10.2788	0.787974
	Nacc1	NM_025788	731.967	6.20654	666.9	8.7409	522.567	22.4043	525.6	11.6086	0.788124
	Ywhaz	NM_011740	20710.9	452.37	21095.4	999.445	15959.2	390.645	16627.3	432.775	0.788196
	Map3k11	NM_022012	1620.9	57.8206	1456.63	42.5421	1262.47	51.9469	1148.47	24.151	0.788443
	Fxn	NM_008044	2241	38.3878	2022.9	125.284	1703.33	71.5404	1595.43	10.413	0.788685
	Arpp19	NM_021548	1600.83	49.4978	1354.67	4.07608	1233.6	32.2971	1068.9	40.0352	0.789048
	Dok4	NM_053246	690.867	18.7269	614	16.1624	569.933	38.7258	484.533	15.863	0.789142
	Mrpl4	NM_023167	1041.1	58.2866	1133.3	51.1336	789.567	36.9712	894.367	15.1267	0.789171
	Gorasp2	NM_027352	459.9	19.9823	438.567	17.1034	358.7	15.6238	346.267	15.225	0.789542
	Syngr2	NM_009304	466.833	17.4194	390.167	23.0025	313.7	25.231	308.233	18.1873	0.790003
	Mtx1	NM_013604	7149.97	127.719	7723.4	485.357	5455.27	116.687	6103.47	256.671	0.790257
	Fkbp5	NM_010220	1186.4	15.5734	1089	40.8697	804.733	12.2073	860.733	40.6598	0.790388
	Smarcal1	NM_018817	809.867	51.174	922.533	17.3037	639.367	15.2597	729.367	24.4056	0.790613
	Bbs12	NM_001008502	325.567	11.2045	254.5	15.9603	224.267	9.97619	201.233	5.80928	0.790699
	Gnb5	NM_010313	246.867	1.48474	230.633	17.5706	197.6	4.63573	182.367	1.03976	0.790724
	Nhp2	NM_026631	6055.33	353.248	6803.97	107.388	4647.57	30.3325	5382.17	246.244	0.791034
	Tmem5	NM_153059	1389.63	50.3528	1259.33	26.7871	1135.77	15.4277	996.433	19.8	0.791241
	Cct4	NM_009837	11382.1	291.302	12235.1	248.624	9031.5	381.759	9681.97	432.786	0.791327
	Sap130	NM_172965	1784.6	72.4429	1963.07	61.674	1459.3	17.6908	1553.83	67.3901	0.791531
	Snx9	NM_025664	1865	63.46	1935.5	50.8357	1388.6	71.5643	1532.17	11.1673	0.791615
	-	XM_127132	2261.43	171.062	1624.7	76.8572	1690.63	64.2629	1286.27	74.4548	0.791697
	Gemin4	NM_177367	2124.6	91.6436	2303.73	40.6305	1664.63	45.3121	1823.97	75.1537	0.791746
	Plk1	NM_011121	1652.17	22.8615	5457.53	257.156	1014	37.6036	4323.1	45.2013	0.792135
	Rhod	NM_007485	2174.17	56.0296	1948.93	96.0717	1935.73	105.552	1544.07	63.6672	0.792265
	Nap1l1	NM_015781	457.5	14.5616	402.733	23.5493	375.467	12.7861	319.1	7.87147	0.792336
	Sin3a	NM_011378	1334.57	79.5717	1259.17	16.6069	1106.3	21.2984	997.9	16.5053	0.792506
	Atic	NM_026195	633.133	27.4683	575.933	19.2262	477.933	29.5076	456.867	19.7948	0.793264
	Tjp2	NM_011597	2124.43	62.3168	1737.6	9.9631	1625.17	76.9514	1378.63	83.6198	0.79341
	Mtmr14	NM_026849	1319.87	37.7583	1764.17	25.2266	1152.8	19.2344	1399.73	54.9016	0.793421
	Htatip2	NM_016865	1204.4	45.0723	1136.27	48.8778	815.267	12.772	901.8	52.2667	0.793649
	Ppif	NM_134084	3452.73	103.064	3260.1	55.5389	2586.17	61.434	2588.4	92.8888	0.793963
	-	NM_183021	378.767	16.2985	559.867	25.9687	312.733	15.3016	444.533	23.515	0.793998
	Kif18a	NM_139303	671.267	53.4655	2699.53	291.543	489.2	51.4375	2143.8	161.371	0.794138
	Pear1	NM_028460	164.333	5.93867	172.5	5.87906	149.4	1.72143	137.067	2.89501	0.794591
	Kif15	NM_010620	166.5	12.3158	251.033	19.216	138.833	8.57075	199.533	12.3386	0.794848
	Taf5	NM_177342	178.767	10.3557	241.933	14.2577	154.033	3.72842	192.3	10.5078	0.794848
	Evi2a	NM_010161	294.133	10.693	294.333	15.5163	232.133	3.11038	234	12.108	0.795018
	St3gal4	NM_009178	467.2	13.9472	343.033	11.6135	369.533	18.32	272.833	7.96353	0.795355
	Ppm2c	NM_001033453	299.8	6.11746	238.233	10.8487	230.3	7.10023	189.533	7.59174	0.795578
	Amd2	NM_007444	1052.6	20.4734	1170.8	21.7373	946.6	19.1772	932.033	43.0871	0.796065
	Slc39a11	NM_027216	1161.57	38.1833	1289.07	22.6781	946.967	26.1672	1026.27	20.506	0.796132
	Ppp3r1	NM_024459	2930.33	150.934	2320.47	26.2288	2236.83	82.3638	1848.7	10.3436	0.796692
	Cs	NM_026444	4869.83	139.335	4414.13	173.31	3730.83	120.15	3518.17	148.306	0.797025
	Dolpp1	NM_020329	371.5	7.29589	414.4	5.93408	327.433	5.77764	330.4	6.46323	0.797297
	Mfsd6	NM_178081	100.1	4.10731	111.933	2.29807	103.933	1.70229	89.2667	2.45244	0.797501
	Egfl7	NM_198724	439.3	12.0226	389.5	19.6054	340.2	13.2455	310.7	2.95691	0.797689
	Yaf2	NM_024189	510.1	19.0867	426.533	15.0184	340.667	7.09937	340.633	5.9308	0.798609
	Galt	NM_016658	763.333	30.4494	691.267	7.17271	626.667	34.3901	552.1	29.3589	0.798678
	Lbr	NM_133815	4926.2	372.816	5764.03	238.042	3835.63	97.3578	4605.77	86.356	0.799054
	Mtmr14	NM_026849	436.4	15.1218	473.3	32.0658	313.233	5.9468	378.2	26.3896	0.79907
	Bok	NM_016778	734.267	28.4826	732.033	21.7503	527.767	30.6447	585.133	46.623	0.799326
	Srd5a3	NM_020611	936.167	34.4292	903.567	28.6764	778.067	43.8635	722.367	10.9667	0.799461
	Rnf220	NM_025739	314.767	9.7059	336.233	18.4655	240.567	8.59929	268.867	8.95997	0.799645
	Fam171a1	NM_001081161	734.733	55.0626	549.4	33.9279	485.067	36.2697	439.667	23.468	0.800268
	Rttn	NM_175542	326.233	4.32371	440.4	19.0886	264.6	6.9515	352.6	9.02903	0.800636
	Ogfrl1	NM_001081079	232.433	7.21257	227.833	5.2362	203	9.05226	182.6	6.42106	0.801464
	Kdm5d	NM_011419	206.5	16.3231	257.3	1.32035	177.2	6.96012	206.267	10.9837	0.80166
	BC030867	NM_153544	215.467	9.83265	347.733	15.2397	189.567	10.1076	278.767	10.9897	0.80167
	Anln	NM_028390	437.5	9.3145	854.2	63.6858	307.8	25.9358	685	31.1426	0.80192
	Ell	NM_007924	1289.97	32.2526	1134.1	18.1006	1179.13	72.8105	909.467	7.28385	0.801928
	Ccnd1	NM_007631	11897.5	419.681	12648.4	371.741	9283.5	207.5	10147.4	583.154	0.802267
	Lmna	NM_019390	12950.8	260.646	12842	147.082	10409.9	680.869	10304.9	412.32	0.802437
	Lmna	NM_001002011	13352.6	448.231	13903.8	410.173	10914.4	554.757	11159.6	331.709	0.802629
	Klf13	NM_021366	770.5	8.00687	609.967	22.1725	614.7	29.0326	489.8	9.54376	0.802994
	Rfxap	NM_133231	1125.1	30.9395	1011.1	11.4072	883.567	72.4853	811.967	42.5619	0.803053
	Ccdc99	NM_027411	663.9	5.45069	1750.37	95.7938	481.6	8.73632	1406.03	33.5925	0.803276
	Cxadr	NM_001025192	312.833	17.2273	291.933	3.94982	226.133	5.24129	234.7	7.3187	0.803952
	Ptges2	NM_133783	481.8	14.2566	478.2	4.55741	366.333	3.15929	384.533	14.2779	0.804126
	EG433923	NM_001081233	3849.73	92.2406	3745.33	122.164	2966.23	66.7207	3012.03	44.5359	0.80421
	St6galnac4	NM_011373	533.133	10.3976	531.8	20.0806	444.533	3.80584	427.7	3.66379	0.80425
	Mre11a	NM_018736	265.8	2.00333	274.567	2.56926	193.6	3.50856	220.867	5.26951	0.804419
	Ccna2	NM_009828	307.467	40.1202	794	110.2	263.833	36.6391	638.733	101.203	0.80445
	Eftud1	NM_175317	493.933	15.2491	465.967	3.34581	387.6	3.75278	375.3	10.641	0.805422
	Sema7a	NM_011352	156	1.35769	142.933	6.11074	115.967	2.05129	115.133	4.89365	0.805503
	Hecw2	NM_001001883	187.4	11.3119	183.167	0.895048	154.7	3.42394	147.6	4.3715	0.805822
	Arl6ip5	NM_022992	7985.63	179.756	7587.77	93.2671	5980.63	46.5122	6114.53	170.451	0.80584
	Unc119b	NM_175352	1837.33	103.713	1500.53	83.1381	1361.53	62.1681	1209.2	29.2842	0.805849
	Slc35c2	NM_144893	656	13.2254	689.667	24.2729	575.1	5.57494	555.833	12.3598	0.805944
	AU014645	NM_001033201	1053.37	37.7186	927.833	19.0286	756.7	11.3377	747.8	15.7992	0.805964
	Recql4	NM_058214	295.067	28.2745	378	10.0779	232.1	6.90097	304.767	4.48491	0.806262
	Stradb	NM_172656	353.467	4.01345	316.4	12.7424	283	20.6899	255.167	9.14336	0.80647
	Evi1	NM_007963	202	6.08714	177.4	1.49332	148.367	2.25783	143.167	4.3552	0.807029
	Etaa1	NM_026576	1040.77	19.5385	1040.97	25.0988	741.933	30.7636	840.333	60.2965	0.80726
	Tubb2b	NM_023716	2891.9	88.9387	4245.47	324.72	2149.13	29.5712	3428.93	126.26	0.807668
	Rbpms2	NM_028030	1196.97	54.0603	1185.27	55.9488	882.733	34.3315	957.333	45.2649	0.807692
	Tmem185b	NM_146103	2072.6	50.8913	2051.67	52.4189	1705.7	48.8593	1657.73	36.8524	0.807991
	Endod1	NM_028013	1584.8	28.4261	1099.2	61.6264	1134.03	96.5849	888.8	52.523	0.808588
	-	XM_147357	7846.13	105.64	14832.9	572.415	5974.8	259.432	12000.4	609.119	0.809039
	Kcnk5	NM_021542	262.667	7.31604	235.4	5.47844	194.433	6.79837	190.467	10.6191	0.809121
	Rpa3	NM_026632	4940.27	252.769	5686.97	199.657	3800.5	193.28	4602.9	138.962	0.809377
	Epas1	NM_010137	300.1	3.15647	263.933	7.40413	260.567	13.4599	213.633	9.34921	0.809421
	Mtx1	NM_013604	1054.87	39.5851	1180.67	39.6335	867.533	18.4776	955.667	50.9118	0.809428
	Hist2h2ac	NM_175662	4541.57	193.91	4031.63	33.7667	3889.63	172.073	3264.77	198.249	0.809789
	Alg9	NM_133981	229.167	3.08022	259.4	4.24617	198.767	11.4112	210.067	8.33473	0.809819
	5730419I09Rik	NM_029081	124.533	3.90057	132.9	6.56836	103.233	0.895048	107.667	4.62829	0.810135
	Lpar1	NM_010336	1126.9	14.4005	1303.53	53.7228	941.733	56.181	1056.07	58.069	0.810162
	Gart	NM_010256	1923.83	63.2615	1777.37	53.3551	1602.33	11.2045	1440.2	45.6195	0.810298
	Zfp763	NM_028543	223.4	7.94628	275.4	5.49939	169.267	19.8725	223.167	14.9061	0.810338
	Sigmar1	NM_011014	633.567	39.6743	645.133	18.4548	498.9	5.51936	522.8	20.3323	0.810376
	Esd	NM_016903	214.167	4.13938	192.533	0.841295	158.6	5.2144	156.033	8.28861	0.810422
	Mcph1	NM_173189	151.267	2.78348	199.367	6.59655	146.967	2.32546	161.6	5.25008	0.810565
	Rnf31	NM_194346	233.133	4.26471	271.967	7.64947	213.367	4.63117	220.5	10.8583	0.81076
	Galnt12	NM_172693	161.5	5.85178	163.467	4.35597	137.1	4.4238	132.567	4.99411	0.810971
	Kif4	NM_008446	652.767	12.2824	1660.07	63.682	457.867	15.4052	1346.47	22.8097	0.811092
	Cd44	NM_009851	172.133	6.72714	166.767	5.44069	146.233	5.59831	135.3	2.8589	0.811312
	Ppp4r1	NM_146081	8681.63	324.329	8436.1	23.1318	7067.3	230.938	6845.67	209.661	0.811473
	Unc119b	NM_175352	3787.03	117.735	3277.9	89.5842	2948.7	80.2607	2661.83	10.8691	0.812053
	1500011H22Rik	NM_026883	1627.23	84.1339	2064.9	4.97427	1367.83	72.1583	1677.57	30.976	0.812422
	Lage3	NM_025410	713.967	11.2996	707.567	25.9672	574.4	15.5809	574.933	8.53431	0.812549
	Nkrf	NM_029891	212.567	7.15177	220.667	3.89416	177.5	8.73232	179.4	7.64286	0.81299
	Hbs1l	NM_019702	542.7	21.0291	512	5.66068	461.6	20.6045	416.433	12.9139	0.813346
	Taf5	NM_177342	449.933	10.539	727.433	27.506	346.333	14.7662	591.667	40.3733	0.813363
	Aspm	NM_009791	577.033	11.3655	1974.27	101.068	396.667	7.00579	1605.9	82.3885	0.813415
	Lrrc49	NM_145616	741.133	34.5664	943.233	48.3152	549.167	18.5517	767.4	41.7216	0.813585
	Ank	NM_020332	1386.73	52.399	1084.17	45.1215	1113.83	29.0106	882.267	37.4882	0.813772
	-	NM_172576	792.733	36.8401	751.667	28.7744	585.933	39.5593	612.167	23.3367	0.814412
	Nab1	NM_008667	392.8	17.1465	323.367	5.44712	282.533	15.1901	263.4	11.0735	0.814554
	Atp6v0d1	NM_013477	1615	65.6432	1252.77	42.2337	1292.97	44.6292	1020.87	60.6171	0.81489
	Tk1	NM_009387	558	24.1123	646.767	11.7702	383.233	9.16012	527.133	23.7415	0.815028
	Pank4	NM_172990	1004.67	58.1703	1046.07	30.5375	809.133	17.288	852.733	19.3703	0.815178
	Oxct1	NM_024188	7675.5	434.577	7791.33	185.711	5864.97	193.367	6352.37	275.234	0.815313
	Xrcc2	NM_020570	227.3	11.4771	288.8	18.3533	194.1	10.9345	235.5	6.03075	0.815443
	Magee1	NM_053201	965.4	6.90097	889.833	15.0933	881.9	37.2119	725.7	2.1362	0.815546
	Psmg1	NM_019537	1088.47	21.0707	1129	9.48701	901.367	62.8874	920.867	5.14144	0.815648
	Baalc	NM_080640	253.167	10.2115	280.267	15.6857	197.033	4.26628	228.633	4.23058	0.815769
	Atp6v0d1	NM_013477	3780.97	124.694	2920.27	112.124	3013.37	132.246	2383.07	138.184	0.816044
	Serp1	NM_030685	3314.9	153.244	2756.23	108.657	2462.8	95.2093	2249.73	111.768	0.816234
	Lyar	NM_025281	2456	159.689	2618.1	97.7718	1926.67	33.8354	2137.37	31.5556	0.816382
	Fahd1	NM_023480	809.1	43.5512	697.467	18.4853	662.233	15.4426	569.633	4.28538	0.816717
	OTTMUSG00000015762	NM_001039223	275.6	7.10587	217.4	8.43267	188.267	10.0096	177.6	9.63968	0.816927
	Dpysl3	NM_009468	1884.23	41.7271	1760.7	19.5717	1563.53	103.573	1438.43	17.1371	0.816965
	Iars2	NM_198653	1209.87	15.3743	1189	45.2527	992.6	32.6145	971.533	16.9668	0.817101
	Prpf3	NM_027541	3451.97	220.104	3553.23	81.8637	2704.63	38.7132	2903.9	118.645	0.817256
	3110082I17Rik	NM_028469	381.667	10.3514	541.7	40.942	339.533	10.0655	442.867	21.4493	0.81755
	Slc25a5	NM_007451	18481.1	353.291	17679.8	725.951	15392.9	411.327	14464.7	725.882	0.818148
	-	XM_135707	2625.57	47.7693	2583.57	76.666	2038.13	117.083	2114.3	77.4062	0.818364
	Espl1	NM_001014976	451.9	46.1881	1387.7	89.3809	362.267	22.6248	1136.1	31.5932	0.818693
	Stard7	NM_139308	3333.77	76.1208	2698.63	79.2892	2511.53	106.298	2209.43	50.1667	0.818723
	Ccnd1	NM_007631	15744.8	279.486	16359.9	94.9563	13089.8	787.865	13397.1	579.641	0.818899
	Hnrpll	NM_144802	3653.67	158.011	2846.93	121.489	2859.23	32.7643	2331.5	64.1017	0.818952
	Wdr55	NM_026464	1049.87	44.736	949.567	18.5388	698.433	45.5551	777.967	23.7614	0.819286
	Mcm10	NM_027290	413	23.9853	512.4	13.9524	302.867	14.0119	419.967	7.6823	0.819608
	Sap30l	NM_001081168	2817.27	193.503	2293.2	96.4429	2359.77	35.3094	1880.4	55.9477	0.81999
	Ttyh2	NM_053273	573.667	16.228	455.733	15.6846	505.433	25.6961	373.7	30.4681	0.819998
	Tyms	NM_021288	2786.67	122.056	3572.1	97.8627	2097.23	111.353	2929.2	173.203	0.820022
	Lmnb2	NM_010722	743.033	60.6492	1090.8	84.6386	594.233	28.7897	894.6	67.9743	0.820132
	Tbc1d22a	NM_145476	1870.9	82.9341	2229.53	8.87061	1772.33	13.3946	1828.53	64.35	0.820141
	Eif4a1	NM_144958	9306.47	286.016	10321.4	197.063	7859.63	101.626	8465.03	315.009	0.820144
	Melk	NM_010790	263.7	24.6784	453.767	36.4372	203.2	9.58488	372.4	3.92301	0.820686
	Neo1	NM_008684	5918.9	143.765	4880.6	76.8337	4822.5	98.9038	4005.53	261.715	0.820704
	Sntb2	NM_009229	1107	46.1964	930.6	24.7734	914.833	20.7133	763.8	15.8273	0.820761
	D15Wsu169e	NM_198420	234.8	3.17648	277.1	12.2153	192.5	4.9521	227.533	8.16993	0.821122
	Gm527	NM_001025605	243.233	1.53768	249.9	11.0259	217.1	0.907377	205.2	4.98631	0.821128
	Pdss1	NM_019501	812.833	43.6002	1249.1	37.7195	618.267	38.3468	1026.6	55.0564	0.821872
	Fut10	NM_134161	435.767	15.4687	558.067	11.348	335.133	23.0207	458.667	26.6356	0.821885
	Dhrs7	NM_025522	651.567	39.5699	576.7	15.2363	440.1	37.1248	474	4.74658	0.821918
	Asf1b	NM_024184	564.767	24.9726	833	25.1088	417.367	8.96964	684.733	15.548	0.822008
	Spire1	NM_176832	485.8	21.4262	482.833	9.32637	320.367	21.05	397	19.1197	0.82223
	Taf5	NM_177342	169.767	6.5244	237.967	11.5675	149.467	1.44491	195.667	5.10044	0.822244
	Stk24	NM_145465	1210.53	45.5101	1106.57	41.2969	943.467	53.7123	910.067	31.764	0.822422
	Mrps16	NM_025440	2138.77	72.4242	2473.97	85.6051	1907.73	102.81	2034.73	42.1754	0.822455
	Il17ra	NM_008359	140.667	5.584	156.067	3.68887	131.9	3.02379	128.367	2.27621	0.822512
	H2afy	NM_012015	5333.03	163.221	4880.5	215.821	4265.17	40.736	4014.4	172.834	0.822539
	Mettl2	NM_172567	1392.47	52.0155	1616.43	31.8342	1216.93	47.321	1329.87	16.898	0.82272
	Ptp4a2	NM_008974	14866	225.579	13260.9	171.75	12705.8	516.294	10912.4	324.71	0.8229
	-	NR_000040	1807.77	53.6838	2375.47	87.085	1463.63	77.7222	1955.63	98.1119	0.82326
	Sgk3	NM_177547	254.4	5.04777	209	10.0719	206.667	2.68721	172.067	2.9339	0.823287
	Bcl2	NM_177410	287.733	4.09159	222.8	9.44952	219.667	9.90965	183.567	19.068	0.823909
	Msh6	NM_010830	5876	537.021	2562.83	197.012	4079.1	88.547	2112.27	119.005	0.824194
	Rfx2	NM_009056	202.167	6.19928	235.033	9.60492	175.633	5.37784	193.733	6.89573	0.82428
	Lrrc49	NM_145616	266.967	18.2521	330.833	17.0206	201.633	0.98714	272.7	3.8553	0.824283
	Kif11	NM_010615	481.267	10.5681	1919.87	50.5526	400	19.6291	1582.93	20.032	0.824499
	Dhrs7	NM_025522	348.367	3.02453	338.5	14.7392	273.1	16.3065	279.1	5.53444	0.82452
	Bcl2	NM_177410	311.167	9.67546	256.933	11.2619	263.4	11.35	211.867	6.90998	0.8246
	Med29	NM_026042	161.633	2.31397	161.733	1.31318	145.267	4.45434	133.367	4.87214	0.824612
	Nusap1	NM_001042652	119.7	5.9925	242.767	9.321	125.133	6.80841	200.2	7.03017	0.824659
	Sh3glb2	NM_139302	1506.7	22.5016	1393	18.1632	1298.43	53.829	1148.8	14.6131	0.824695
	Kpna1	NM_008465	1231.93	19.9056	1095.03	32.9625	991.767	45.7772	903.233	20.4183	0.824848
	Iqcc	NM_198026	188.033	5.39269	195.467	3.31126	185.067	3.9074	161.233	3.92188	0.82486
	Cdca3	NM_013538	4405.87	138.255	8485.43	423.471	3253.57	144.669	6999.3	246.138	0.824861
	Arhgap19	NM_027667	143.333	2.35537	185.067	10.9423	120.967	6.04051	152.667	1.9342	0.824928
	Slc25a10	NM_013770	661.9	49.6958	811.433	16.9839	517.967	11.4706	669.5	26.6986	0.825084
	Snapc3	NM_029949	393.133	15.7925	380.433	14.1828	352.433	5.91843	313.9	2.70062	0.825112
	Tyms	NM_021288	893.867	26.2283	1130.93	43.2235	669.367	29.4261	933.767	46.2244	0.825663
	Zcchc8	NM_027494	2661.73	135.149	3460.7	95.4144	2617.9	135.594	2857.4	77.3622	0.825671
	Mtmr2	NM_023858	1095.23	38.1048	988.267	72.8407	826.2	11.68	816.033	16.4047	0.825721
	Limk1	NM_010717	1048.23	26.1266	876.633	4.69551	920.767	9.55865	723.867	40.567	0.825736
	Birc5	NM_009689	1760.63	92.7562	4066.13	107.548	1243.97	6.21298	3357.7	184.373	0.825773
	Pank1	NM_023792	738.2	24.2184	657.3	13.7706	585.367	1.16809	542.9	8.4388	0.825955
	Wsb2	NM_021539	6488.67	209.133	5518.5	204.744	5734.7	193.604	4558.37	113.056	0.826016
	Melk	NM_010790	262.833	11.5724	488.8	25.8376	212.067	3.51773	403.8	26.1108	0.826105
	Ppa2	NM_146141	1636.67	57.9326	1611.53	115.884	1149.23	10.4167	1331.83	46.4062	0.826438
	Pkn3	NM_153805	307.067	16.3179	437.1	21.47	259.233	9.70504	361.267	13.7174	0.826509
	Adsl	NM_009634	1424.97	32.6673	1330.43	28.7516	1147.9	40.5308	1100.27	26.567	0.827003
	-	XM_485055	404.967	10.8728	411.967	5.32051	353.133	6.96092	340.8	11.0503	0.827251
	Cdc6	NM_011799	1821.33	54.8341	557.867	25.1969	1004.83	51.054	461.5	37.4572	0.827258
	Slc44a1	NM_133891	215.6	6.21798	221.233	4.63333	185.467	3.71184	183.067	6.83138	0.827485
	Cmas	NM_009908	3401.6	39.3838	3003.37	18.31	2742.67	102.562	2485.47	130.154	0.82756
	Ankrd6	NM_001012451	379.667	3.56293	355.433	5.91505	296.6	10.3116	294.333	4.35903	0.828097
	Heatr1	NM_144835	1832.07	70.2433	1868.57	64.8125	1392.43	86.2416	1547.77	55.6035	0.828318
	Zfp238	NM_013915	439.667	13.1849	379.167	21.1988	362.167	9.95395	314.133	6.80008	0.828482
	-	XM_127336	482.367	26.2457	388.9	16.1901	460.2	6.43454	322.233	35.6228	0.828575
	Melk	NM_010790	221.467	8.14889	354.033	39.4682	177.767	4.54838	293.367	14.4684	0.828643
	Cdca2	NM_175384	690	10.3317	2557.77	109.653	528.933	58.5149	2120.27	40.1801	0.828953
	Foxs1	NM_010226	308.567	12.5349	287.767	4.07117	246.767	12.3797	238.667	4.77575	0.829376
	Prpf3	NM_027541	4180.5	69.5733	4702.37	120.109	3410.07	174.588	3901.57	28.343	0.829703
	Dcps	NM_027030	1756.2	76.2982	2091.97	40.6087	1461.03	103.147	1735.77	42.7798	0.82973
	-	XM_148465	376.067	34.5815	462.467	5.05184	298.833	16.084	383.9	7.13372	0.830113
	Ilf3	NM_010561	3315.97	205.068	3492.17	48.2856	2675.83	62.4876	2899.07	61.4062	0.830163
	Cdca3	NM_013538	1157.43	84.7407	2147.2	154.742	887.933	16.1675	1784.07	68.7319	0.830882
	Tubb2b	NM_023716	21584.6	227.261	29304.6	1348.85	16912.6	603.083	24364.7	631.986	0.831429
	Diap3	NM_019670	1310.37	94.8835	2447.73	202.156	1030.53	53.667	2035.43	47.3536	0.831558
	-	NM_153168	1008.77	25.5732	1221.53	45.7227	862.633	12.2529	1015.9	28.8703	0.831662
	Mutyh	NM_133250	138.8	1.38924	184.567	3.74715	132.3	4.93187	153.5	4.05134	0.831676
	-	XM_109923	2927.77	12.5594	2903.13	51.4257	2573.73	100.453	2414.97	117.792	0.83185
	Mns1	NM_008613	1705.87	108.252	2547.03	22.2578	1263.07	35.2459	2118.8	55.6188	0.831871
	Mras	NM_008624	567.767	33.8839	403.1	11.8749	412.133	5.43364	335.367	22.9122	0.83197
	Cenpa	NM_007681	11759.6	314.075	18782.5	435.864	8470.53	566.965	15633.1	764.464	0.832323
	Hemk1	NM_133984	394.867	20.6359	582.4	24.2315	426.667	20.8168	484.933	25.5427	0.832646
	9530077C05Rik	NM_026739	164.2	7.30023	197.533	5.59534	153.467	5.6881	164.533	4.76876	0.832939
	Kctd12b	NM_175429	290.9	13.5736	229.9	8.12794	183.7	13.238	191.667	12.0638	0.833697
	Atp6v0d1	NM_013477	1514.97	78.3509	1159.73	70.6359	1198.7	44.0256	967.067	38.7626	0.833873
	Pop5	NM_026398	1968.77	36.2308	1998.03	19.0377	1592.8	115.644	1666.2	55.7048	0.833921
	Snx25	NM_207213	376.567	7.57855	336.833	13.2982	309.367	10.2232	280.967	6.40113	0.834143
	Dars2	NM_172644	261.6	8.20325	357.733	18.992	220.833	3.75648	298.467	12.4588	0.834329
	Sfxn5	NM_178639	131.833	3.8255	177.167	4.39141	135.233	2.61874	147.833	5.66784	0.834427
	G3bp2	NM_001080794	7024.47	182.459	6226.9	348.725	5634.07	113.863	5196.6	33.6055	0.83454
	Tle1	NM_011599	382.2	12.6982	349.733	4.97505	351.5	11.2518	291.867	5.20139	0.834542
	-	XM_123003	869.8	33.2145	875.1	31.1288	673.367	7.90808	730.633	1.38363	0.834914
	1700037H04Rik	NM_026091	10744.1	206.843	10009.1	18.2517	8110.93	138.756	8357.6	179.055	0.835
	Polr3g	NM_001081176	370.233	23.1147	320.567	18.667	247.5	4.95681	267.767	17.1326	0.835292
	Atg16l1	NM_029846	1281.2	51.7286	1090.47	19.3981	1042.4	50.7064	910.867	47.8874	0.835298
	Arl6ip5	NM_022992	7758.97	126.482	7107	204.69	5707.67	37.3288	5936.47	196.173	0.835299
	Plekhg3	NM_153804	390.433	17.4236	485.367	12.4756	317.1	18.3468	405.567	19.123	0.835588
	Qars	NM_133794	5385.73	166.772	5221.17	246.745	4347.37	64.0702	4370.43	78.8604	0.83706
	Ttf2	NM_001013026	1008.87	22.2873	1271	27.7627	692.767	24.8902	1064.83	45.9612	0.837789
	Fnta	NM_008033	5901.1	154.512	5247.97	205.786	4909	23.3603	4398.07	138.437	0.838052
	Ppm1a	NM_008910	3785.93	195.107	3764.53	61.5633	3002.4	144.605	3155.1	55.1849	0.838113
	Atic	NM_026195	2556.27	119.428	2133.93	92.0522	1917.47	86.0999	1788.77	70.0581	0.838251
	Mrpl40	NM_010922	2520	128.962	2430	59.7237	2041.23	44.8972	2037.3	13.1533	0.838395
	Aggf1	NM_025630	3579.87	30.6394	3487	31.1965	3052.7	130.045	2924.33	74.6541	0.838638
	Gps1	NM_145370	3434.93	112.811	3316.43	52.3738	3217.5	104.764	2782.13	61.5782	0.838893
	Rad50	NM_009012	1010.2	17.1343	1235.9	6.07152	822.333	24.1312	1037	27.5582	0.839065
	Tprkb	NM_176842	1330.73	20.4012	1248.67	36.2674	1153.63	16.5748	1047.87	41.4291	0.839189
	Ccnd1	NM_007631	6605.73	165.017	7136.37	348.671	4936.17	49.6434	5994	439.364	0.839923
	Ctps	NM_016748	4682.17	84.0083	4058.07	88.7338	3984.53	117.969	3409.7	199.579	0.840227
	Men1	NM_008583	1061.87	47.9681	1131.63	31.3374	865.6	20.3574	950.867	41.0555	0.840263
	Coq4	NM_178693	197.667	6.43074	249.933	5.36542	187.6	4.24421	210.167	2.96779	0.840893
	Leprel1	NM_173379	463.533	12.9705	420.967	17.7695	364.567	21.0336	354.1	13.8753	0.841159
	Trappc9	NM_029640	414.967	17.3114	443.7	14.4015	338.1	10.2666	373.333	9.89046	0.841409
	Metap1	NM_175224	5207.73	6.18663	5028.27	163.152	4331.97	84.5876	4231.47	74.3962	0.841536
	Grk6	NM_001038018	519.6	35.8539	579.867	13.6548	366.7	11.5678	488.033	26.5823	0.841629
	Nudt19	NM_033080	1153.53	39.087	832.233	8.084	929.667	35.9181	700.567	24.4842	0.841792
	Xkr8	NM_201368	244.833	2.34118	269.533	4.40353	225.833	9.53596	226.9	3.05505	0.841826
	Trabd	NM_026485	534.633	24.4597	508.867	14.9294	429	9.943	428.4	4.97896	0.84187
	3000004C01Rik	NM_197959	274.967	5.16409	865.833	23.5944	242.933	8.20657	729.033	32.5774	0.842002
	Xrcc2	NM_020570	270.967	24.5282	348.933	4.4307	223.567	8.0838	294	14.609	0.842569
	-	XM_283545	2575.7	56.4969	2066.8	26.06	2025.73	78.0436	1743.23	55.1253	0.843444
	Bves	NM_024285	2762.6	39.2124	2688.63	16.9338	2315.2	71.9351	2267.83	129.099	0.843489
	Rasa1	NM_145452	5798.27	136.307	4880.63	196.819	4659.5	280.22	4118.47	134.29	0.84384
	-	XM_132552	592.8	26.9949	510.8	17.35	500.767	17.4416	431.067	2.28498	0.843906
	Wnt7b	NM_009528	152.133	3.91847	157.133	3.7547	132.133	1.64958	132.667	4.12566	0.844298
	C230094A16Rik	NM_146016	102.633	2.65665	115.167	1.08372	103.833	3.51679	97.2667	1.16237	0.844571
	Sertad2	NM_021372	1196.33	61.7053	939.4	72.3859	1016.83	20.0629	793.533	27.1943	0.844723
	Nrf1	NM_010938	888.733	19.8345	1020.97	31.0897	841.267	35.1311	862.567	5.78686	0.84485
	Gldc	NM_138595	112.433	1.90992	130.367	1.94022	112.633	2.21911	110.167	0.926163	0.845053
	Stk39	NM_016866	200.167	2.60278	219.133	1.29914	160.367	2.85793	185.2	5.34072	0.845149
	Gkap1	NM_019832	1005.37	40.3467	812.133	47.3318	850.2	12.5644	686.467	34.2194	0.845264
	Hmmr	NM_013552	165.133	13.4345	297.467	31.0261	153.967	1.0729	251.467	5.57146	0.845361
	Znrd1	NM_023162	4378.87	147.308	5576.1	128.412	4210	181.465	4713.9	165.378	0.845376
	Irx2	NM_010574	411.433	17.9129	309.8	9.87995	305.533	10.7973	261.9	15.3977	0.845384
	Thoc4	NM_011568	6006.33	256.245	6632.43	186.607	4556.03	160.816	5607.67	79.1642	0.845493
	AU021838	NM_001037746	1066.97	43.3241	859.2	22.3276	773.5	16.9677	726.7	9.04673	0.845787
	Kif4	NM_008446	268.5	8.90187	540.467	41.7	190.433	2.29807	457.433	10.0668	0.846366
	Dnajc16	NM_172338	1148.17	75.6732	946.333	26.3084	994.1	39.5242	801.067	21.1356	0.846496
	Olfr812	NM_146795	111.267	1.86667	120.833	0.868588	110.333	2.71437	102.3	3.5171	0.846623
	Slc25a15	NM_181325	746.567	22.6969	620.4	16.7369	550	20.4688	525.367	19.3498	0.84682
	Orc5l	NM_011959	978.667	41.5687	945.6	23.6204	777.5	20.9772	800.767	16.3671	0.846835
	Spag5	NM_017407	1614.03	62.876	4230	108.689	1310.8	19.9271	3584.63	50.5226	0.84743
	-	XM_125861	324.9	9.8764	893.567	54.398	248.333	10.5411	757.367	26.9901	0.847577
	Cdc2a	NM_007659	140.033	4.2881	193	8.65871	119.3	4.6188	163.633	4.7365	0.847839
	Donson	NM_021720	551.467	25.7062	404.033	25.3481	404.5	13.3323	342.567	9.85382	0.847869
	Cdc25c	NM_009860	328.033	40.3344	934.7	53.1045	247.233	12.3468	792.667	15.3667	0.848044
	-	XM_130287	2624.57	73.7282	4678.13	119.128	2141.53	24.6045	3968.33	210.016	0.848273
	Kif4	NM_008446	302.233	14.1264	611.4	48.8815	244.733	4.04654	518.733	23.119	0.848435
	Eml3	NM_144872	1073.33	22.6098	826.033	17.0624	856.667	34.3909	700.933	19.3599	0.848553
	Palb2	NM_001081238	133.667	3.01183	129.533	1.50259	118.633	1.53442	109.933	2.4037	0.848687
	Rpl4	NM_024212	5080.13	201.408	4949.1	112.491	4297.43	136.131	4201.77	109.08	0.848997
	Foxm1	NM_008021	1029.33	43.6973	1926.83	92.4044	795.167	26.7186	1636	60.7281	0.849063
	Mipep	NM_027436	1115.67	33.251	1288.53	28.9105	947.8	45.1683	1094.33	39.2269	0.849286
	Entpd3	NM_178676	137.367	2.98068	154.2	2.95127	132.067	1.39204	130.967	3.19705	0.849332
	Cmtm8	NM_027294	164.567	7.02242	153.467	2.50954	170.5	5.01232	130.367	4.39103	0.849479
	Cdkl2	NM_177270	320.7	15.0985	275.333	9.48373	240.967	13.3559	233.9	6.58964	0.849517
	Shmt1	NM_009171	443.8	20.8063	411.4	5.34634	364.6	10.5432	349.567	9.03813	0.849701
	Cib2	NM_019686	536.433	17.9409	422.4	4.18848	497.4	45.5461	358.933	6.82162	0.849747
	Reep4	NM_180588	543.033	30.7584	1320.6	74.4022	504.133	26.0974	1123.33	65.0077	0.850621
	Ppm1l	NM_178726	1540.4	17.1305	1302.4	15.1891	1311.27	92.6525	1108.13	31.6819	0.850837
	Ext1	NM_010162	4440.23	155.465	3824.13	71.1093	4019.07	187.649	3254.87	162.33	0.85114
	Mut	NM_008650	105.933	3.09318	104.633	1.38604	99.4	2.5658	89.0667	2.23632	0.85123
	Abhd2	NM_018811	442.567	34.4699	328.933	7.79879	339.667	21.4433	280.033	9.89349	0.851338
	Tardbp	NM_145556	276	15.6385	218.733	9.22141	240.533	6.20278	186.233	3.00241	0.851417
	Tbc1d7	NM_025935	146.333	2.76546	159.767	5.37598	130.167	4.4916	136.1	3.53412	0.851866
	Entpd4	NM_026174	1786.43	15.6542	1707.27	61.8205	1679.53	40.5801	1454.6	17.6693	0.852003
	Ncaph	NM_144818	1677.5	46.2309	3578.07	82.5751	1206.63	23.8762	3048.87	268.698	0.852099
	Alg8	NM_199035	461.633	11.1947	551.733	6.58846	401.067	16.9683	470.233	1.26667	0.852284
	Rnf141	NM_025999	209.967	5.18148	225.467	7.99694	164.933	11.9942	192.167	2.76727	0.852307
	Prune	NM_173347	298.567	9.74343	309.067	9.57572	242.6	9.25851	263.467	9.79291	0.852459
	Psmd8	NM_026545	4436.77	173.046	4203.83	97.5673	3630.57	57.1965	3585.97	161.044	0.853025
	Sfxn1	NM_027324	6445.8	198.818	5843	127.52	5382.97	223.163	4986.03	234.878	0.853334
	Scarb2	NM_007644	788.567	30.2624	669.633	14.3895	671.067	17.1665	571.467	21.483	0.853403
	BC046331	NM_177673	846.933	21.8655	695.567	9.77093	746.533	10.4539	593.7	33.5163	0.853548
	Zfx	NM_011768	1091.17	36.5997	1326.73	43.3956	1009.33	26.5554	1132.5	35.2696	0.853602
	-	XM_132806	4557.57	182.311	5534.5	205.28	3618.6	76.5463	4724.27	99.7438	0.853604
	Lrp8	NM_053073	150.333	3.27482	161.067	6.1507	132.6	3.20052	137.5	1.47986	0.853682
	Upf1	NM_030680	529.933	13.5268	524.433	6.69934	455.533	4.49382	447.7	7.00309	0.853684
	Sertad2	NM_001038625	3550.2	119.494	2973.9	24.506	3045.47	72.9349	2539.2	92.5396	0.853828
	Mmp10	NM_019471	212.7	7.63151	177.567	10.0999	142.2	2.45764	151.7	5.18588	0.854325
	-	XM_133123	28607.4	753.956	28779.1	388.201	25716.2	289.181	24600.9	278.802	0.854818
	1110057K04Rik	NM_172401	1825.83	60.7725	1799.97	48.2779	1389.03	56.5433	1540.27	59.8429	0.85572
	Cdca4	NM_028023	1141.2	60.4229	1575.13	92.5512	912.367	17.518	1347.9	52.2623	0.855739
	Lsm2	NM_030597	1138.2	85.6793	1860.77	17.9921	1100.27	30.8637	1592.5	43.0701	0.855829
	Parp2	NM_009632	817.067	20.1784	1135.23	44.0836	710.433	36.6053	971.567	37.8264	0.855833
	Lrrk2	NM_025730	374.833	21.5032	326.067	21.5729	261.1	5.60268	279.133	6.8754	0.85606
	Plek2	NM_013738	208.933	4.16507	157.8	5.25071	147.767	10.681	135.167	7.21349	0.856572
	3000004C01Rik	NM_197959	597.1	12.0826	2452.87	19.5183	431.767	19.8771	2101.43	63.2699	0.856723
	Esco2	NM_028039	483.967	8.56355	1009.43	71.3739	396.667	15.8301	864.867	40.2527	0.856787
	Nudt19	NM_033080	671.067	17.6552	513.333	34.3948	538.7	45.3726	439.933	8.94992	0.857013
	Gabpb2	NM_172512	564.333	23.3835	800.867	30.0893	515.2	13.3806	686.533	53.5139	0.857237
	Dus4l	NM_028002	379.8	17.1197	487.6	5.28488	336.5	10.8885	418	30.0127	0.85726
	Dcbld1	NM_025705	245.767	6.592	197.433	9.54452	179.333	3.90142	169.267	5.74872	0.857339
	9530002B09Rik	NM_023865	93.0667	1.12596	104.967	3.46041	89.6	1.8735	90	2.30724	0.857412
	Tubb2b	NM_023716	1884.1	57.7297	2728.77	222.835	1369.03	36.65	2339.73	90.8132	0.85743
	Pnkp	NM_021549	1136.67	24.4847	1393.4	62.7788	1016.3	15.386	1195.6	25.304	0.858045
	Abcf2	NM_013853	5755.97	260.718	5411.7	94.2198	4464.83	90.6481	4644.37	130.094	0.858209
	Phka1	NM_012031	270.4	4.33128	273.4	2.65393	237	6.19919	234.733	6.32833	0.85857
	Sema6c	NM_011351	121.167	2.95654	141.033	3.38247	128.533	2.40993	121.1	2.57747	0.858664
	Nup37	NM_028334	289.367	22.1044	470.667	20.7511	249	3.01993	404.167	9.67494	0.858711
	Cugbp1	NM_198683	870.7	11.5637	765.067	15.9094	704.2	44.8912	657	21.6763	0.858748
	Hint1	NM_008248	11103.9	346.448	11735.5	175.029	8834.8	569.316	10078.7	340.528	0.858822
	Jag2	NM_010588	220.233	7.88021	192.033	5.28089	158.833	7.43288	164.933	7.15945	0.858878
	Parp1	NM_007415	2325.47	30.7338	2013.23	20.8878	2029.83	46.5788	1729.17	107.44	0.858903
	D4Wsu114e	NM_001025365	242.467	10.3437	592.3	48.329	252.6	8.8636	508.767	38.6588	0.858968
	-	XM_129483	482.667	21.4052	781.067	29.7664	446.367	4.61531	670.933	13.9272	0.858995
	Epc2	NM_172663	2080.5	18.8407	2482.7	105.404	1795.73	47.8029	2133.33	81.3782	0.859278
	Sptlc2	NM_011479	166.867	1.67066	178.667	3.96835	152.633	2.62953	153.567	3.36171	0.859515
	Arl6ip1	NM_019419	4712.93	84.157	14885.1	588.721	4026.43	203.07	12796.3	275.038	0.859672
	Impdh2	NM_011830	10813.9	188.945	10003.1	137.523	8041.37	253.034	8601.03	78.6092	0.859836
	Slc17a5	NM_172773	180.033	2.71191	196.967	4.87522	174.267	3.15401	169.367	3.13174	0.859875
	Dctpp1	NM_023203	3030.53	23.73	3191.13	75.1605	2485.83	51.9778	2745.07	66.1789	0.860219
	Btbd6	NM_201646	761.667	1.21427	667.3	10.429	581.533	6.14609	574.033	10.8182	0.860232
	Aurka	NM_011497	1024.6	83.1892	7038.87	258.23	925.1	61.7367	6055.23	69.4437	0.860256
	Ints12	NM_027927	961.6	31.4248	1154.3	58.4262	823.333	41.2735	993	9.40071	0.860262
	Plec1	NM_201391	122.4	1.92959	118.7	5.41972	100.333	2.24078	102.133	3.48919	0.86043
	Cdc2a	NM_007659	1671.63	74.5279	6590.53	275.837	1305.83	78.941	5670.7	279.365	0.860432
	Nfkbil2	NM_183091	501.7	12.1993	430.533	12.1266	436	19.6327	370.5	13.1242	0.860561
	Sypl	NM_013635	5988.07	211.297	5431	71.7415	4750.27	226.031	4673.93	200.741	0.860602
	1500001M20Rik	NM_026894	1850.43	58.2078	2067.7	152.929	1338.7	30.8002	1782.07	64.7931	0.861861
	Cbln3	NM_019820	100.267	2.88116	107.067	0.491031	105.567	2.43059	92.3333	0.808977	0.862388
	AI467606	NM_178901	765.367	20.7464	929.8	36.9746	688.433	3.10501	801.967	43.0399	0.862516
	Ptpla	NM_013935	12784.9	416.143	12434.8	212.966	9615.2	432.533	10728.7	336.233	0.862796
	Ssrp1	NM_182990	3957.33	78.3504	4739.17	190.673	3696.33	46.5685	4093.4	127.569	0.863738
	D10Wsu102e	NM_026579	1259.97	11.1269	1119.87	16.6941	1037.7	62.0928	967.333	33.5425	0.86379
	Zfp326	NM_018759	1526.83	64.9667	1157.53	47.0812	1164.13	94.3897	1000.1	53.9679	0.863995
	Uhrf1	NM_010931	9115.77	159.303	7023.83	184.663	7621.23	258.534	6069.1	251.276	0.864073
	Pip4k2b	NM_054051	2548.93	121.733	2251.9	70.8761	2095.93	38.6992	1946.4	80.6499	0.864337
	9630058J23Rik	NM_146105	824	70.3609	600.5	14.6702	620.567	29.2862	519.1	10.0802	0.864446
	Ncapd3	NM_178113	1595.8	69.5009	1545.63	46.3856	1144.63	31.9279	1336.27	38.4351	0.864547
	Mcm4	NM_008565	310.567	7.80648	213.9	11.2882	267.3	12.9747	185	19.9676	0.86489
	Isca1	NM_026921	2908.1	130.078	2689.97	53.0375	2420.03	39.0675	2327.8	20.0166	0.865363
	Sfmbt1	NM_019460	256.333	5.1187	208.8	5.68888	210.4	6.4671	180.7	9.1697	0.865421
	Gtse1	NM_013882	341.7	31.6076	1203.07	35.4796	299.267	9.4351	1041.6	47.286	0.865785
	BC016495	NM_145497	239.433	5.51674	223.833	6.09845	210.167	7.0525	193.833	5.25241	0.865972
	Noc4l	NM_153570	790.4	17.0694	945.367	21.3331	670.833	6.01618	818.667	7.54019	0.865978
	1110007A13Rik	NM_145955	3613.77	229.144	2581.33	58.8453	3058.73	56.2477	2236.77	71.5439	0.866518
	Smyd5	NM_144918	1131.83	16.1089	1102	21.595	859.4	39.9321	954.933	58.7588	0.866545
	Als2cr4	NM_001037812	1214.07	23.9726	1317.33	49.6672	968.5	35.8984	1141.67	15.1004	0.866655
	Mapk14	NM_011951	3576.87	76.513	3135.7	48.1536	3123.43	111.792	2717.77	71.0423	0.866719
	Tmem60	NM_177601	2051.67	37.1453	1806.83	76.9136	1754.7	67.9553	1566.17	41.704	0.866805
	-	NR_002702	19334	286.62	19573	433.719	16883.9	217.213	16979.9	488.042	0.867516
	Parp2	NM_009632	1710.1	84.7925	2282.4	59.8194	1525.53	9.04108	1980.87	62.109	0.867889
	Arl10	NM_019968	118.533	2.61683	117.6	0.61101	112.433	1.44491	102.067	1.98522	0.867917
	Exosc8	NM_027148	4340	112.204	6016.57	133.183	3423.43	167.629	5223.1	41.3842	0.868119
	Rars	NM_025936	4077.5	82.0406	4069.97	34.1794	3284.73	114.927	3533.4	44.2387	0.868164
	Shisa5	NM_025858	2426.43	32.2342	2059.23	39.4638	2029.27	47.8045	1787.9	92.4956	0.868237
	Apeh	NM_146226	3303.87	42.1614	3132.6	127.938	3155.43	41.3844	2722	47.103	0.868927
	A530082C11Rik	NM_177186	208.467	4.01345	205.467	1.5592	188.9	4.93288	178.567	2.80496	0.869079
	Arhgap27	NM_133715	150.4	5.45008	158.367	7.73657	121.633	3.43382	137.667	1.2252	0.869291
	Mtbp	NM_134092	1464.87	38.2996	1965	73.9759	1232.33	27.8918	1708.47	88.4352	0.86945
	Fbxo34	NM_030236	808.9	26.0849	997.833	30.8143	738.5	39.1296	868.033	13.345	0.869918
	6720460F02Rik	NM_144526	274.467	7.76881	636.5	20.3161	215.1	5.47753	553.767	22.6838	0.870019
	Fbxo7	NM_153195	304.033	9.60561	273.5	9.07322	261.633	6.32306	238	6.354	0.870201
	Ulk2	NM_013881	397.067	10.3938	326	8.85513	332.6	15.3132	283.8	14.4421	0.870552
	Mre11a	NM_018736	1409.57	28.4702	1489.13	56.6773	1110.87	32.084	1296.53	31.9611	0.870663
	Reep3	NM_178606	2847.7	90.8447	2403.8	107.527	2655.37	101.83	2093.23	37.0028	0.8708
	Pus1	NM_001025561	459.167	27.2048	411.4	2.65393	370.5	6.99738	358.533	5.47154	0.871495
	2310061C15Rik	NM_026844	956.733	81.33	1326.17	72.8296	831.3	60.8624	1156	59.4385	0.871683
	Spag5	NM_017407	127.6	4.21228	197.8	4.34051	133.2	4.95681	172.433	2.42304	0.871754
	Fbxo28	NM_175127	2224.33	12.2102	1867.77	28.6124	1819.2	32.6194	1628.27	16.8738	0.871772
	Dut	NM_023595	377.933	27.17	283.167	2.9339	332.733	10.0459	246.9	1.15326	0.871924
	Ccnb1	NM_172301	2538.57	205.024	16150	828.571	1789.63	125.927	14086.5	466.937	0.872229
	-	XM_133123	27293.3	385.733	27070	221.29	23712.5	875.509	23611.8	884.187	0.87225
	1810009O10Rik	NM_197989	1423.63	46.6709	1525.6	22.7921	1139.77	18.1108	1330.87	31.0905	0.872358
	Rbm45	NM_153405	1478.57	38.9625	1237.43	48.4113	1358.87	37.0552	1080.6	40.5725	0.873262
	Cdc6	NM_011799	121.133	3.36518	108.233	2.42647	114.3	1.78979	94.5333	2.61173	0.873424
	Hpse	NM_152803	223.233	6.23601	206.4	0.87178	162.867	10.6568	180.3	3.0348	0.873547
	Ctdspl2	NM_212450	273.333	5.57295	257	2.12838	225.8	10.9024	224.533	7.12515	0.873669
	Zfp326	NM_018759	1189.4	37.9887	891.467	49.7881	889.967	33.3394	778.9	27.9625	0.873728
	Prep	NM_011156	2400.43	86.926	2142.63	90.0265	1871.93	71.7106	1872.23	43.4715	0.8738
	4932441K18Rik	NM_178935	302.467	2.83862	404.2	16.2525	285.433	5.48766	353.367	2.73394	0.874238
	Cdc20	NM_023223	1225.97	30.8233	3677.43	134.222	938.433	25.1774	3215.23	234.564	0.874314
	Ing1	NM_011919	1069.63	62.6835	1344.7	79.6717	918.133	41.0175	1176.5	28.2985	0.874916
	Noc4l	NM_153570	1311.83	29.5028	1553.9	71.9881	1195.43	11.9199	1359.7	25.1291	0.875024
	Dnajc2	NM_009584	3244.87	137.003	3244.2	43.5546	2511.83	94.3489	2838.87	102.672	0.87506
	Gas7	NM_008088	200.567	4.86118	183.533	5.23461	162	4.92172	160.633	3.58019	0.875227
	Acot7	NM_133348	917.933	14.643	1007.73	25.4489	753.3	25.1003	882.967	18.5217	0.876194
	Cstf1	NM_024199	2707.63	148.304	3847.03	131.964	2473.47	157.304	3371.73	81.6136	0.87645
	Fntb	NM_145927	2196.7	101.044	2528.43	65.9062	1949.7	31.0864	2217.13	21.3392	0.87688
	Grwd1	NM_153419	1590.77	6.1031	1723	36.5251	1137	16.398	1511.47	72.873	0.877232
	Kif2c	NM_134471	631.5	52.2222	2167.8	100.979	539.933	25.7812	1901.67	76.4566	0.877235
	Dolk	NM_177648	3384.53	113.627	2896.53	175.544	3008.97	38.4726	2541.8	60.3073	0.877533
	Clpx	NM_011802	340	15.7535	360.433	5.39269	285.033	7.46332	316.367	4.07117	0.877741
	Mrps17	NM_025450	4871.93	139.314	6043.57	216.281	4513.1	90.9382	5304.73	133.935	0.877748
	-	XM_355238	2478	172.021	2893.2	10.1569	2028.5	132.431	2539.63	57.8115	0.877793
	Ndufs4	NM_010887	6687.8	109.841	6785.53	92.7598	5610.1	245.395	5957.8	71.4794	0.878015
	Batf3	NM_030060	246.833	6.52414	165.367	7.9184	177.4	12.4744	145.233	1.63435	0.878247
	Top2a	NM_011623	1269	96.657	5918.07	304.324	949.7	61.1925	5198	81.5279	0.878327
	Fanci	NM_145946	220.3	6.60101	292.3	2.02237	169.667	7.90239	256.767	10.203	0.878437
	Dguok	NM_013764	1083.97	35.4449	1224.03	29.4415	980.9	34.8104	1075.33	25.7717	0.878516
	3000004C01Rik	NM_197959	438.233	9.16012	1743.53	48.5196	347.2	13.7609	1532.7	46.5224	0.879079
	Iars	NM_172015	5687.2	212.953	6267.53	131.905	4308.3	130.859	5510.47	114.063	0.879209
	Triobp	NM_138579	7213.73	309.344	8231.83	105.56	6077.3	77.0208	7238.93	221.301	0.879383
	Pik3r2	NM_008841	372.5	5.98025	323.233	10.9487	330.4	8.65583	284.3	16.2567	0.879551
	Thoc6	NM_001008425	1409.67	14.0203	1645.87	39.1334	1399.4	28.3274	1447.63	25.8654	0.879553
	Cdc25c	NM_009860	392.267	15.5959	1094.8	36.2983	334.567	16.5874	963.067	45.8649	0.879674
	Ruvbl1	NM_019685	3225.5	60.2935	3105.93	83.5728	2549.7	81.6042	2733.23	120.575	0.880004
	C330023M02Rik	NM_172722	1531.63	20.1271	1484.2	6.40807	1259.1	32.6344	1306.37	76.7805	0.880185
	Ctps	NM_016748	2010.5	64.2883	1575.63	85.549	1679.2	55.0504	1387.1	29.4068	0.880346
	Chaf1a	NM_013733	1641.73	42.7486	1488.2	43.056	1248.07	34.9873	1310.47	51.3687	0.880574
	Tubb2b	NM_023716	2580.27	36.3603	3807.27	211.358	2006.27	19.909	3353.67	244.488	0.88086
	1110002N22Rik	NM_183275	421.333	8.43452	508.233	19.2059	378.633	1.84962	447.7	17.1035	0.880895
	Ndufs4	NM_010887	7214.13	183.919	7696.23	180.356	6442	34.3408	6780.73	103.567	0.881046
	Nmnat3	NM_144533	124.133	7.20748	153.133	5.37287	119.833	2.03415	134.933	1.83515	0.881149
	C230052I12Rik	NM_178643	155.567	3.73512	204.767	10.1276	147.5	6.32218	180.433	10.1103	0.881162
	Cmtm4	NM_153582	1111.7	77.3345	731.5	25.9277	826.133	26.0802	644.933	7.61497	0.881658
	Mobkl2a	NM_172457	1118.8	9.96009	988.933	25.9371	1022.5	21.3657	872.133	55.0668	0.881893
	Nfkbie	NM_008690	301	3.10859	455.1	29.265	319.033	21.1599	401.433	19.148	0.882076
	Nde1	NM_023317	342.667	11.2453	510.6	21.5347	320.7	11.0109	450.4	20.7727	0.882099
	Slc35b3	NM_134060	2988.53	43.6506	2534.7	91.6289	2480	93.8775	2236.03	30.1828	0.882168
	Mrpl51	NM_025595	294.767	6.71127	335.933	4.64627	251.333	2.19418	296.633	5.09324	0.883012
	Hk1	NM_010438	351.967	3.09049	288.667	11.1643	270.833	16.8136	255.1	10.7643	0.883717
	Scd1	NM_009127	8368.97	74.2622	7324.97	219.789	7443.9	208.185	6473.27	190.709	0.883726
	Ccnb1	NM_172301	2510	270.48	16322.4	479.772	1759.23	148.605	14437.5	598.685	0.884521
	Ampd2	NM_028779	627.067	20.5516	521.8	19.1772	550.133	17.827	461.633	6.81819	0.884693
	-	XM_142269	115.533	2.0177	128.433	2.08833	127.733	3.14872	113.667	0.384419	0.88503
	AI480653	NM_198626	664.433	28.0818	547.667	6.53716	494.133	14.3216	484.8	36.57	0.885209
	Hirip3	NM_172746	1341.83	13.5063	1778.57	114.208	1023.5	61.7172	1574.53	43.8261	0.885279
	Fam122b	NM_030167	172.533	13.0646	234.167	9.03426	149.4	2.08167	207.333	5.53333	0.885407
	Smc1a	NM_019710	2284.4	60.5429	2808.73	27.3689	2069.47	94.2196	2487.17	43.7993	0.885514
	Rwdd1	NM_025614	348.3	10.8503	369.667	13.9337	285.067	5.86184	327.567	12.1672	0.886114
	Mcm3	NM_008563	1093.03	85.51	737.633	23.6257	837.967	17.3579	653.733	7.18803	0.886258
	Gemin6	NM_026053	1037.63	34.5836	1481.97	56.9124	777.533	42.9838	1313.57	28.8632	0.886367
	Htr5b	NM_010483	242.967	6.84406	183.633	2.45515	164.467	5.26445	162.767	2.08513	0.886371
	Ccne2	NM_009830	1145.83	25.9168	351.2	8.96047	786.1	41.6505	311.3	10.971	0.88639
	4933434E20Rik	NM_025762	4085.7	84.0795	4383.83	107.385	3559.17	129.732	3886.4	56.8742	0.886531
	Sgk3	NM_177547	370.133	5.47733	306.967	5.87007	314.967	10.1703	272.167	3.18346	0.886633
	Mtrf1l	NM_175374	900.567	24.1331	717.1	9.5296	721.133	46.9334	636	23.7769	0.886906
	-	NM_001025613	184.033	4.64949	173.367	2.88232	164.033	0.233333	153.833	3.37161	0.887326
	-	XM_144475	199.933	14.2835	328.8	27.7623	165.433	3.54134	291.767	8.10357	0.887369
	Gp9	NM_018762	159	2.34592	149.3	4.08412	133.667	2.6346	132.533	4.15706	0.887696
	Tmed1	NM_010744	2497.27	88.4676	3071	45.5316	2256.93	45.3779	2729.43	37.2475	0.888776
	Rab8b	NM_173413	2013.33	26.0872	1980.4	21.429	1580.97	47.167	1760.33	58.3461	0.888876
	A430005L14Rik	NM_175287	720.4	26.0761	599.033	16.8358	609.1	9.93294	532.467	13.0849	0.888878
	Mcm4	NM_008565	14290.2	263.745	9080.47	178.127	12501.9	61.0333	8072.23	272.312	0.888966
	Nt5c3	NM_026004	664.1	10.0481	643.9	12.9361	590.2	15.7124	572.5	16.2679	0.889113
	Ccdc108	NM_001039495	114.8	2.35797	127.767	1.88001	114	1.00664	113.6	2.80416	0.889118
	Twf2	NM_011876	1007.13	42.6962	886.767	3.33533	938.767	34.4081	789.1	22.4193	0.889862
	Rnf113a1	NM_153503	235.9	4.18609	259.833	3.67076	209	5.10131	231.233	5.98786	0.889929
	Abhd2	NM_018811	646.1	20.0929	480.167	22.5766	495.5	13.5884	427.333	14.5003	0.889967
	Slco1a5	NM_130861	191.167	8.25638	199.167	3.94011	154.867	5.68341	177.267	6.49419	0.890042
	Shisa5	NM_025858	3132.27	40.2141	2721.43	90.2767	2546.17	76.5813	2422.9	81.2002	0.890304
	Zgpat	NM_001048148	401.9	18.67	320	11.1946	352.167	6.72714	285	2.36925	0.890625
	Pole	NM_011132	912.367	19.3822	1123.63	52.7478	733.7	33.7249	1001.5	38.9947	0.891308
	4931440F15Rik	NM_176829	123.167	2.70883	142.2	3.57631	118.7	1.249	126.767	2.7552	0.89147
	Ccdc92	NM_144819	360.267	7.61672	546.133	16.8563	371.633	20.3949	486.867	9.94893	0.891481
	Slc35b3	NM_134060	2583.7	69.78	2169.1	20.3581	1983.23	81.3349	1934.43	36.5666	0.891812
	Rnf6	NM_028774	2073.53	52.7031	2464.1	51.8072	2048.37	62.8291	2198.73	64.3089	0.892306
	Rprd1b	NM_027434	1681.27	43.6827	1391	31.8277	1373.6	49.0638	1241.47	59.6854	0.892502
	Kitl	NM_013598	247.467	13.2076	194	7.78717	211.033	11.2066	173.167	7.74303	0.892613
	Pex13	NM_023651	211.733	8.26041	214.967	6.66942	167.967	1.61898	191.933	6.62177	0.892849
	Mgat4b	NM_145926	1969.87	57.6777	1674.1	48.6022	1498.57	47.1435	1495.07	28.5725	0.893059
	BC026590	NM_001081420	825.167	18.4959	791.5	5.84836	757.033	14.634	707.1	13.7369	0.893367
	Tia1	NM_146170	183.867	5.6746	250.5	5.14328	177.633	7.50563	223.8	7.67876	0.893413
	Slc9a8	NM_148929	464.867	12.8016	673.533	6.8387	478.867	28.5786	601.8	29.0689	0.893497
	-	XM_131155	276.6	6.98594	490.133	7.80819	235.533	8.85933	437.967	15.6244	0.893568
	Ankrd54	NM_144849	314.633	13.2984	357.333	13.4512	263.567	4.27291	319.4	3.89743	0.893844
	Pbk	NM_023209	2200.83	96.4763	4744.43	273.447	1681.1	35.0203	4240.9	204.48	0.893869
	Mrpl1	NM_053158	1090.83	38.0286	1338.7	52.1715	1003.7	46.826	1196.87	34.0969	0.894054
	Zfp329	NM_026046	119.167	0.924362	128.1	2.07846	125.033	0.845248	114.567	0.417665	0.894356
	Ncaph2	NM_025795	962.633	57.4188	1098.47	4.11191	771.167	14.4487	982.6	29.98	0.894517
	Coil	NM_016706	363.267	8.33013	406.633	2.46329	317.233	5.34925	363.8	10.4078	0.894664
	Dbf4	NM_013726	2703.33	73.5492	4616.93	140.126	1915.3	43.2581	4130.83	59.3581	0.894714
	-	XM_131404	202.533	8.99895	708.9	59.0102	189.2	21.6002	634.367	30.6686	0.894861
	Spag9	NM_027569	933.3	54.7007	691.567	45.7647	864.067	41.0951	619.433	44.8729	0.895695
	Mfge8	NM_001045489	24774.3	666.089	21775	893.385	21706	562.933	19508	648.522	0.89589
	-	XM_128129	717.367	46.1934	497.467	35.5731	633.6	42.8269	445.8	20.3397	0.89614
	D19Wsu162e	NM_146099	7259.53	181.537	6403.17	103.862	7246.9	72.3901	5738.47	141.207	0.896192
	Mutyh	NM_133250	172.433	9.17902	229.5	12.1533	160.067	4.88274	205.7	6.86464	0.896296
	Ap1gbp1	NM_194341	342.8	10.5083	273.633	5.64456	344.4	10.2357	245.267	13.4735	0.896336
	4930503L19Rik	NM_172967	324.767	19.3859	453.533	30.9872	275.1	10.3006	406.667	5.66284	0.896665
	Tas2r109	NM_207017	96.9	1.4	106.267	0.990511	91.8667	2.47813	95.3	2.00333	0.896798
	Cit	NM_007708	203.133	8.41474	404.467	20.9078	187.567	8.0524	362.967	22.9957	0.897396
	Gzf1	NM_028986	1183.5	51.077	1610.17	54.0366	1332.4	25.1574	1445	30.8005	0.897421
	Foxm1	NM_008021	766.767	40.4377	1597.8	33.9641	639.2	32.0188	1433.9	16.4962	0.897421
	Brca2	NM_001081001	154	3.80175	175	5.31445	140.567	5.4272	157.1	3.38575	0.897714
	Rab15	NM_134050	273.033	12.7714	221.967	9.79631	277.433	6.47311	199.3	1.35031	0.897881
	Ankrd54	NM_144849	776.267	21.895	1009.83	14.5238	742.233	22.5526	906.867	54.285	0.898039
	-	XM_354617	124.5	0.680686	124	1.6773	119.867	2.49154	111.433	2.11056	0.898653
	Bcor	NM_175044	492.133	18.4501	422.767	11.6896	374	15.1205	380	10.3684	0.89884
	G3bp1	NM_013716	4128.07	1.06667	4282.33	28.7485	3710.83	149.38	3851.13	57.1189	0.899307
	Nedd1	NM_008682	928.767	27.9252	1144.6	57.0083	772.833	43.9171	1029.47	38.1054	0.899415
	Tmc6	NM_145439	546.267	26.1652	451.5	43.359	588.533	9.94138	406.4	3.10215	0.900111
	Gemin6	NM_026053	968.333	10.1916	1431.8	44.7573	742.6	47.1009	1289.33	27.1862	0.900496
	Casp9	NM_015733	865.367	32.9673	657.3	22.3884	808.567	19.8121	592.3	43.0344	0.901111
	-	NM_183138	119.433	1.09747	113.4	1.81475	109.033	2.67416	102.233	1.68951	0.901526
	Dnmbp	NM_028029	156.467	3.41874	158	1.7673	143.367	2.53136	142.5	0.896289	0.901899
	Mdm1	NM_148922	212.233	5.5107	324.567	30.3946	189.933	8.87869	292.733	17.3168	0.901919
	Tmem11	NM_173453	4795.87	58.0492	5208.93	192.717	4305.63	45.9606	4699.1	50.3298	0.902124
	Acat2	NM_009338	2914.23	54.2661	2641.87	114.64	2189.13	28.3006	2385.07	111.972	0.902796
	Kpna2	NM_010655	452.1	44.8228	2016.63	228.042	402.867	42.069	1820.63	102.892	0.902808
	Cdca4	NM_028023	4949.27	255.437	6398.6	406.849	4026.7	249.446	5777.87	220.228	0.90299
	Pmm1	NM_013872	680.6	31.5872	497	24.028	547.9	33.1845	448.833	9.75881	0.903085
	Rnasen	NM_026799	2079.97	9.66253	2128.47	28.4824	1757.83	70.2865	1924.1	62.2244	0.903983
	Tia1	NM_146170	373.333	10.083	544.5	27.8647	356.233	13.4918	492.3	11.9718	0.904132
	Tpx2	NM_028109	1937.4	109.353	4266.17	195.407	1513.67	90.1644	3857.93	99.8341	0.904308
	Rhbdd1	NM_029777	1198.73	42.7632	1465.73	75.256	1098.7	21.4001	1325.63	37.0207	0.904416
	Tmem97	NM_133706	2707.83	99.1971	3296.23	57.3604	2069.47	44.266	2982.47	115.164	0.904812
	Ppp2r5a	NM_144880	1633.9	21.2185	1369.23	83.4919	1400.1	48.2786	1239.23	18.464	0.905056
	-	XM_194070	739.067	48.2017	945.2	32.9864	598	14.8956	855.533	25.3522	0.905134
	Eef1d	NM_029663	1771.27	77.1297	1387.33	27.5764	1550.63	78.2295	1255.97	50.1603	0.905315
	Cdc20	NM_023223	572.267	20.806	1383.4	111.992	401	7.42226	1253.57	56.5311	0.906152
	Tmed1	NM_010744	653.333	24.7461	783.033	23.6602	678.9	8.72315	709.567	7.27011	0.906178
	Schip1	NM_013928	1142.9	41.615	1038.67	19.2276	929.833	17.8297	941.267	17.6654	0.906223
	Cenpi	NM_145924	361.167	1.91949	680.033	28.6964	282.833	16.8509	616.333	6.37452	0.906328
	Dlst	NM_030225	4478.57	155.533	3847.87	149.423	3649.33	54.0069	3488.17	52.0046	0.90652
	Dtx2	NM_023742	181.5	1.85023	205.867	3.05523	155.7	6.60908	186.633	2.51153	0.906571
	Fam155a	NM_173446	102.3	0.85049	101.033	1.96497	106.4	0.305505	91.6	1.70587	0.906634
	Iars	NM_172015	161.9	7.05006	170.733	5.03002	135.533	3.6997	154.8	2.16564	0.906679
	1300014I06Rik	NM_025831	285.567	5.05118	239.067	1.7742	277.9	16.3557	216.8	10.451	0.906859
	Fancd2	NM_001033244	349.5	12.869	596.2	13.9844	277.333	8.76096	540.833	6.5244	0.907134
	Brd4	NM_020508	6228.5	42.3	5922.53	83.2347	5162.93	95.299	5375.23	169.103	0.90759
	Mtmr1	NM_016985	221.3	4.91528	243.6	4.21584	200.933	4.13333	221.233	3.08455	0.908181
	Nusap1	NM_133851	145.667	8.31592	522.933	50.3575	147.767	9.50164	474.933	5.12196	0.90821
	Ulk2	NM_013881	310.633	10.3773	257.7	9.20344	250.667	8.32052	234.067	1.31698	0.908293
	Decr1	NM_026172	176.033	0.523874	167.333	4.34371	176.533	3.15929	152.033	2.71559	0.908566
	Iars	NM_172015	8502.13	296.497	8924.2	204.402	6777.1	382.053	8113.77	202.725	0.909187
	Cdkn2d	NM_009878	386.2	37.7826	835.733	20.19	321.6	27.1574	759.9	32.1921	0.909262
	2310035K24Rik	NM_027129	351.033	21.0667	422.3	10.1106	330.333	6.9066	384.1	5.57524	0.909543
	Myd88	NM_010851	2970.9	107.556	2542.33	21.1904	2538.13	39.6363	2312.57	115.692	0.909626
	Polg	NM_017462	338.6	9.36002	286.667	14.3216	269.433	5.0762	260.933	13.2416	0.91023
	9530058B02Rik	NM_026633	362.333	11.1529	340.933	7.07138	284.533	9.84248	310.4	13.7384	0.910443
	9030612M13Rik	NM_172458	551.833	18.0655	463.2	18.8004	490.433	10.9144	421.767	10.0024	0.910551
	Stambpl1	NM_029682	830.067	18.081	660.2	22.9954	628.6	27.4632	601.467	28.903	0.911038
	Chtf18	NM_145409	1137.9	105.429	1669.13	5.49707	923.833	48.7678	1520.9	69.0931	0.911193
	Ints5	NM_176843	1017	13.9371	1103.4	57.5225	808.5	30.715	1005.93	35.3259	0.911664
	Rad9b	NM_144912	123.167	3.90142	147.933	2.46667	135.533	2.38421	134.867	2.86026	0.911676
	Rims2	NM_053271	164.4	6.7092	138.5	4.09512	134.5	2.25019	126.433	4.04365	0.912874
	Ankmy2	NM_146033	1768.93	61.9667	1444.4	19.8598	1583.1	81.74	1319.7	25.0034	0.913667
	Mier2	NM_027422	1543.57	63.2326	1181.9	35.6267	1436.37	65.6772	1079.97	20.9262	0.913758
	Cdc25c	NM_009860	130.367	4.94177	237.767	19.3778	116.3	8.83421	217.267	27.9099	0.913781
	Ccdc32	NM_199310	1013.2	38.3987	1216.43	9.69559	1009.63	28.718	1111.93	5.05712	0.914093
	Nusap1	NM_133851	892.167	104.208	8069.13	294.817	744.4	72.7517	7378.13	56.2226	0.914365
	-	XM_131022	178.433	10.3949	220.3	10.3693	162.667	3.88559	201.533	2.33619	0.914812
	-	NM_146114	152	5.56507	211	5.75529	157.467	3.12908	193.367	6.92684	0.916431
	Pop1	NM_152894	497	14.1783	487.133	6.64187	367.767	12.1623	446.6	7.87676	0.916793
	-	XM_283661	479.433	18.3759	1898.9	181.385	432.067	32.732	1741.03	55.66	0.916862
	Cdkl2	NM_177270	334.067	4.19537	270.833	4.01262	244	9.38314	248.333	11.6825	0.916923
	Pcnt	NM_008787	230.2	28.9037	327.9	11.724	220.233	14.6254	300.667	1.67365	0.916947
	Rps4x	NM_009094	27621.5	760.529	25420.3	590.998	23262.7	160.929	23312.1	803.465	0.917066
	H2-M10.6	NM_201611	109.733	0.733333	124.967	2.24524	118.967	0.768838	114.633	2.03825	0.917306
	Fbxw2	NM_013890	269.933	8.47159	253.967	7.85585	214.433	9.346	232.967	4.65093	0.917312
	BC053749	NM_183321	293.533	16.8306	423.167	22.6758	283.533	13.2691	388.233	7.39602	0.917446
	Eftud2	NM_011431	1537.47	53.9669	1681.63	22.8181	1327.93	57.3074	1542.83	14.4631	0.917461
	Incenp	NM_016692	669.6	21.6809	2002.37	34.0366	569.333	25.1884	1837.23	68.5596	0.917528
	Cdca5	NM_026410	655.333	33.0982	1020.77	9.40857	522.467	24.3751	936.633	45.1849	0.917575
	Mapre1	NM_007896	10535	111.944	9981.3	205.885	9412.83	87.1194	9159	126.104	0.917616
	Olfr792	NM_001011849	105.967	1.73622	109.467	0.927961	96.2667	1.16952	100.467	2.08673	0.917783
	Gm561	NM_001033297	1543.93	32.5849	1441.63	34.2126	1374.7	33.9111	1323.4	9.5687	0.917989
	Kctd12b	NM_175429	163	8.55823	145.667	2.58607	124.1	2.55343	133.733	2.84156	0.918073
	Thoc4	NM_011568	8874.3	155.954	10123.8	130.133	7645.17	339.794	9297.27	110.751	0.918358
	Vps36	NM_027338	4469.67	26.0532	3901	109.88	3545.7	51.7936	3583.93	60.4492	0.918721
	Gtf3c2	NM_027901	2722.03	94.9614	3274.9	119.979	2331.47	64.8461	3010	49.8244	0.919112
	Arih1	NM_019927	1212.33	22.6541	1068.37	25.7365	1027.5	17.8807	982	52.1558	0.919157
	Ddx52	NM_030096	2297.93	94.3978	2557.43	75.9961	1986.53	70.0955	2351.3	51.734	0.9194
	Adat1	NM_013925	205.9	4.18609	292.233	14.0867	191.033	14.0253	268.8	7.66964	0.919814
	Sclt1	NM_001081411	198.267	7.62132	214.267	6.26108	170.333	4.38039	197.1	3.68646	0.91988
	-	NM_030155	728.933	27.6141	690.2	9.3	583.5	16.7157	635.033	11.8668	0.920071
	Slc16a6	NM_134038	203.5	0.896289	247.1	5.16172	177.1	2.46847	227.4	17.4141	0.920275
	Grwd1	NM_153419	671.167	47.9933	791	44.4471	519.767	13.8099	728	30.2596	0.920354
	Mcm4	NM_008565	331.3	32.6194	182.833	6.21673	260.267	23.2207	168.3	19.5255	0.920512
	Ppp1ca	NM_031868	14098.4	334.724	12403.5	175.981	12189.7	426.274	11422.6	209.219	0.920917
	Cnr1	NM_007726	169.533	4.03829	157.9	3.58097	162.667	3.09049	145.433	1.97005	0.921045
	Ptprj	NM_008982	168.533	1.82056	146.767	4.5042	143.133	4.58779	135.333	4.9411	0.922094
	Slc35b3	NM_134060	514.5	6.39296	417.1	14.2114	414.133	8.60704	384.733	12.7783	0.9224
	Mical1	NM_138315	285.7	2.92632	251.133	14.353	305.4	6.87047	231.733	5.0416	0.92275
	Ap1b1	NM_007454	2118.47	46.4159	1924.77	44.7011	1740.37	58.9955	1776.73	69.2095	0.923087
	Sgol1	NM_028232	799.567	11.1118	2115.23	98.9462	599.567	14.7988	1953.47	24.5228	0.923526
	Cenpl	NM_027429	504.033	36.2551	1985.43	196.993	471.567	15.6607	1833.63	83.7704	0.923543
	-	NM_145989	260.933	13.2879	210.3	12.8741	204.3	5.11566	194.267	1.0651	0.923761
	1700047I17Rik1	NM_028527	737.967	23.536	554.4	21.8935	630.867	36.6434	512.233	34.2055	0.923941
	6430706D22Rik	NM_172505	230.8	6.66658	327.267	0.24037	238.733	24.3803	302.6	8.47368	0.924627
	6430706D22Rik	NM_198652	2001.5	219.824	3919.37	88.187	1772.43	140.248	3623.97	84.2214	0.924631
	Ccdc123	NM_028120	471.533	12.3344	781.633	30.0722	479.433	23.3528	723.333	6.36195	0.925413
	Sv2a	NM_022030	380.567	29.0733	299.367	14.7558	393.1	13.8597	277.333	7.88761	0.926398
	2610020H08Rik	NM_001004187	184.267	7.8893	207.2	7.37292	140.8	3.46458	192.033	9.83198	0.9268
	-	NM_177581	1411.5	134.769	2265.3	140.641	1502.63	52.6347	2100	82.3005	0.92703
	Slc9a8	NM_178371	566.467	31.1216	862.2	46.4216	700.167	36.0948	799.5	37.4185	0.927279
	Mcm5	NM_008566	7243.17	153.743	5331.03	106.994	5488.47	229.128	4943.8	186.106	0.927363
	Triobp	NM_138579	5904.63	197.446	6846.83	72.6582	5000.27	226.085	6352.8	26.6991	0.927845
	BC048355	NM_207161	635.133	32.1932	625.2	28.707	461.433	20.5987	580.133	3.32683	0.927916
	Chd1	NM_007690	593.667	25.7734	482.667	21.8782	454.967	4.97237	448.233	27.6656	0.928659
	Fam110a	NM_146127	386.333	23.6464	877.9	39.5137	432.167	25.3242	815.633	40.7847	0.929073
	Spag9	NM_027569	456.767	27.2458	375.567	13.4251	427.1	6.17333	348.967	3.50444	0.929174
	Cbwd1	NM_146097	1325.93	70.6526	1675.13	70.9785	1213.43	23.4544	1557.37	24.0915	0.929701
	Rpl18	NM_009077	26305	206.567	25151.3	683.779	23056.4	538.025	23397.2	112.98	0.930258
	Brwd2	NM_172255	323.5	5.80546	295.3	8.8	250.4	8.57574	274.767	12.5215	0.930467
	Rfx1	NM_009055	866.7	31.2684	1088.7	37.8299	841.2	17.4697	1013.83	45.0224	0.93123
	Tas2r106	NM_207016	121.867	1.35319	121.633	0.99387	110.967	2.45515	113.3	1.58745	0.931491
	Gps1	NM_145370	183.433	3.44787	162.3	2.26053	152.367	7.58449	151.333	2.38351	0.932428
	Lrp12	NM_172814	3697.1	106.247	2890.87	155.029	3250.47	134.026	2698.8	130.549	0.93356
	Tmem138	NM_028411	302.8	18.0935	362.867	20.7681	252.7	5.22717	338.8	13.7022	0.933675
	Cdc20	NM_023223	3003.27	91.4604	8360.77	110.849	2489.97	59.5013	7807.17	88.2085	0.933786
	Stxbp4	NM_011505	330.433	17.3222	480.433	11.8504	388.767	14.5465	448.7	26.7358	0.933949
	Hmgb2	NM_008252	3411.6	261.954	6302.1	312.294	2653.9	105.321	5888.1	117.939	0.934308
	Cdc20	NM_023223	1228.63	17.6131	3459.53	111.483	969.3	54.8794	3232.6	228.589	0.934404
	Dmtf1	NM_011806	551.7	20.1803	413.733	6.88291	479.167	17.9986	386.767	36.3815	0.934823
	Ccdc51	NM_025689	212.133	8.77142	262.967	9.25659	213.933	3.53097	245.867	3.1168	0.934973
	Bzw1	NM_025824	14961.6	130.2	12845	396.968	12674.7	114.118	12019.2	274.512	0.93571
	Dhx15	NM_007839	10091.1	184.726	8830.43	210.767	8998.13	112.718	8264.93	296.48	0.93596
	Nckipsd	NM_030729	296.3	6.08276	266.2	2.48261	298	6.99738	249.167	7.41672	0.936014
	Wdhd1	NM_172598	680.933	38.135	408	15.111	509.3	38.1657	382.033	16.1926	0.936355
	Dclre1b	NM_133865	161.333	5.18534	177.633	3.56573	138.567	5.54747	166.467	0.233333	0.93714
	BC088983	NM_001009951	429.833	8.94247	700.033	29.9285	418.5	13.9737	656.1	14.7327	0.937242
	Uchl5	NM_019562	1927.77	139.727	2527.07	155.373	1717.13	42.6798	2370.93	16.6397	0.938213
	Rab43	NM_133717	338.9	14.0627	259.3	2.30651	288.133	13.5745	243.6	7.56924	0.939452
	Vmn2r81	NM_175936	134.733	1.83515	125.2	2.59294	136.567	0.751295	117.633	2.84976	0.939561
	Olfr341	NM_146950	107.567	0.033333	119.633	3.12908	103.867	1.58149	112.5	1.55671	0.940376
	Nup88	NM_172394	6853.87	145.585	7187.03	99.1158	5818.87	213.931	6763.43	247.933	0.94106
	1110049F12Rik	NM_025411	1261.1	27.8776	1555.63	55.7298	1122.7	25.2024	1463.97	38.7903	0.941079
	2410017P07Rik	NM_026643	338.6	16.5004	505.367	3.45897	299.333	24.4974	475.6	12.9218	0.941098
	Tubd1	NM_019756	179.8	3.81576	232.067	10.3254	164.9	5.91974	218.5	5.44426	0.941538
	Cenpq	NM_031863	1478.03	73.0409	2618.47	122.363	1265.57	56.9569	2466.07	47.9533	0.941798
	D6Wsu163e	NM_138594	808.867	1.77044	1004.47	18.3038	844.733	21.8529	946.333	12.7768	0.942122
	Pols	NM_198600	1505.93	65.5607	2005.37	73.5356	1286.93	53.7747	1891.87	74.0288	0.943402
	Med22	NM_001033908	816.167	8.68991	640.267	42.0524	617.633	14.3208	604.3	10.9586	0.943825
	Bub3	NM_009774	279.9	10.6165	506.6	26.7052	285.2	5.8046	478.433	2.47745	0.9444
	-	NM_153536	164.7	2.70617	173.733	5.584	194.833	2.48752	164.1	3.11929	0.944553
	2410129H14Rik	NM_175245	990.033	32.1276	1301.13	35.1045	892.3	26.3077	1229.1	72.6126	0.94464
	Dnttip1	NM_133763	5300.8	159.691	4458.73	218.363	4928.13	103.473	4214.07	7.31672	0.945128
	Slc2a6	NM_172659	591.8	11.8874	461.633	6.15693	388.633	20.8183	436.4	32.1481	0.94534
	Jazf1	NM_173406	174.667	5.38186	142.967	1.45182	156.167	1.82787	135.2	3.89743	0.945673
	Mtss1l	NM_198625	144.767	6.76864	144.433	3.74893	184.5	3.35012	136.633	6.78339	0.945996
	Rad51	NM_011234	960.1	11.4175	1384.9	78.3171	849.1	63.5345	1310.57	66.3985	0.946328
	E2f5	NM_007892	880.933	46.0421	1369.47	58.9463	982.933	28.8981	1296.23	44.6785	0.946519
	Ppp1ca	NM_031868	13087.6	82.6229	11574.1	145.692	11163.1	365.509	10956.8	144.698	0.946665
	Pip4k2c	NM_054097	2630.83	96.7121	2045.23	46.6702	2394.97	75.6086	1936.33	22.2717	0.946754
	Sgol1	NM_028232	113.167	3.39231	142.333	3.69564	108.4	8.52819	134.767	2.98347	0.946843
	Gjb3	NM_008126	275.3	7.53414	226.533	7.41493	219.033	9.97034	214.5	8.28312	0.946882
	Eif1ad	NM_027236	874.6	33.1216	1035.87	41.8902	763.7	19.2006	981.2	17.3512	0.947223
	Nup85	NM_001002929	3610.03	300.499	4523.77	39.912	2899.5	43.0728	4285.1	77.2313	0.947241
	Ubox5	NM_080562	524.1	9.73259	647.8	16.752	485.5	1.97315	614.233	19.5622	0.948183
	Bcl2l11	NM_207680	201.833	4.20648	171.3	8.19024	203.167	5.25907	162.467	6.88799	0.948435
	Rpp30	NM_019428	2691.2	211.103	3923.4	15.0522	2396.83	89.2206	3722.77	83.882	0.948863
	Cmtm4	NM_153582	604.8	2.04287	456.767	12.9949	535.467	18.0171	433.433	10.6734	0.948915
	Hlx	NM_008250	243.3	4.531	317.7	15.8872	246.267	6.27809	301.533	15.6504	0.949112
	Fut10	NM_001012517	590.867	30.6097	920.6	85.6103	513.367	15.0653	874.167	42.5059	0.949562
	Lin54	NM_172714	1512	99.2676	2306.2	66.3593	1251.23	26.0948	2189.93	149.26	0.949584
	-	NM_146231	355.233	17.4305	527.333	18.3797	353.8	10.5702	500.8	27.8383	0.949685
	4933421E11Rik	NM_001039478	212	6.73003	262.167	3.73333	218.833	11.1119	249.2	5.32572	0.950539
	Limd2	NM_172397	313	2.32594	278.867	7.31672	322.6	14.3977	265.1	5.9808	0.950632
	Rsrc1	NM_025822	761.8	47.3203	1012.77	40.7672	702.6	17.5605	963.367	5.86411	0.95122
	Fzr1	NM_019757	2271.13	66.9228	6813.9	197.979	2488.53	153.826	6487.13	150.337	0.952044
	Pmm1	NM_013872	518.467	35.842	352.7	24.7047	398.433	13.3365	335.9	17.3601	0.952367
	Tmx4	NM_029148	934.533	26.7067	786.267	22.9789	860.867	34.2525	749.167	7.37797	0.952815
	Grsf1	NM_178700	3658.3	81.0139	2902.2	73.8675	3454.5	143.917	2765.3	155.219	0.952829
	Mettl14	NM_201638	996.233	31.1419	1328.2	46.176	928.7	36.2555	1265.83	59.8875	0.953042
	Rpl7l1	NM_025433	3338.87	38.135	3671.17	48.4032	3109.23	88.5117	3502.1	61.5931	0.953947
	C330027C09Rik	NM_172616	434.4	29.6541	629.4	21.3181	381.2	27.4316	600.533	12.7768	0.954136
	Rad54l	NM_009015	447.2	33.5633	593.433	19.5684	382	21.9208	566.267	17.8298	0.954222
	3110002H16Rik	NM_029623	1154.47	43.5083	983.833	11.2056	1042.07	11.9438	938.8	25.7498	0.954227
	Wdr22	NM_177267	431.833	14.6124	356.633	15.1574	410.233	11.0282	340.333	5.29413	0.954295
	Xkr5	NM_176951	186.633	4.74037	284.967	7.96876	165.367	2.99017	272	13.5356	0.954496
	Kpna6	NM_008468	248.7	6.21718	218.533	2.65853	238.6	3.29697	208.733	6.11673	0.955156
	Ino80b	NM_023547	337.9	13.574	494.667	21.4565	375.6	9.90825	472.533	11.4027	0.955255
	Pknox1	NM_016670	276.3	15.7424	343.467	14.6449	256.767	12.4719	328.2	7.81729	0.95555
	Rnf10	NM_016698	4946.9	174.655	4015.6	89.33	4409.47	168.546	3840.6	114.249	0.95642
	BC055324	NM_201364	449	12.5157	619.533	10.3554	353	13.4879	592.967	16.3693	0.957119
	Hist1h3g	NM_145073	246.7	3.8371	278.267	0.726483	225.9	5.40771	266.5	8.40714	0.957713
	Tmem186	NM_025708	356.4	16.9589	467.067	5.79204	341.867	13.5841	447.367	14.2761	0.957822
	Fzr1	NM_019757	354.5	9.90673	860.733	37.3927	346.6	34.0472	824.533	41.4641	0.957943
	Mrm1	NM_145433	522.2	14.1302	379.333	3.3193	496.8	29.8443	363.6	12.8508	0.958525
	-	XM_132322	643.067	51.9049	908.8	18.3506	507.567	41.8683	871.167	21.4172	0.95859
	Mtbp	NM_134092	1387.8	52.0039	1664.8	74.5719	1065.63	33.6754	1597.03	55.5548	0.959292
	Apbb1ip	NM_019456	150.533	4.20331	133.967	2.9248	120.567	3.89972	128.567	1.03976	0.959692
	Syngr4	NM_021482	101.633	1.62207	119.1	2.28108	109.867	2.47813	114.3	1.79536	0.959698
	3010026O09Rik	NM_026543	251.267	8.01298	417	4.24539	229.067	4.78377	400.233	19.2789	0.959791
	1110059E24Rik	NM_025423	1691.93	78.1947	2013.67	43.3118	1687.67	56.8535	1933.1	18.3713	0.959988
	L3mbtl2	NM_145993	798.933	24.6354	1099.3	51.1722	636.1	38.9123	1055.53	9.58216	0.960184
	Prr3	NM_145487	1119.67	27.9559	959.967	10.0323	1054.5	27.0593	922.167	28.0453	0.960624
	Slc22a3	NM_011395	122.233	2.42235	109.667	1.82239	106.767	2.69959	105.367	2.1605	0.96079
	Gtse1	NM_013882	873.867	39.2986	3313.63	96.7842	810.3	38.7637	3183.77	118.073	0.96081
	BC052040	NM_207264	785.867	28.0069	1345.6	49.8036	794.267	17.7825	1293.73	13.2712	0.961452
	Tmem50b	NM_030018	470.267	19.7754	315.733	25.4171	390.3	32.6256	303.567	2.15278	0.961467
	Zfp423	NM_033327	96.1667	0.952774	104.067	1.07134	97.2	0.702377	100.067	1.21701	0.961563
	Xpr1	NM_011273	435.767	7.44789	368.7	7.56241	422.067	8.80082	354.567	16.3687	0.961668
	Shcbp1	NM_011369	424.067	5.69103	679.433	88.024	346.533	1.67066	653.6	18.8813	0.961979
	4930427A07Rik	NM_134041	226.667	27.2798	350.967	8.48063	214.8	16.3148	337.633	5.7736	0.962008
	Med27	NM_026896	1125.47	33.5848	1426.7	23.5108	1283.4	43.9468	1373.1	15.8981	0.962431
	Txnl4a	NM_178604	3926.43	169.846	3810.57	70.3185	3138.37	74.882	3667.63	74.8456	0.962489
	Rrm1	NM_009103	3580.87	34.2456	4403.83	155.233	3185	183.915	4239.27	156.538	0.962633
	Skiv2l2	NM_028151	6035.83	141.605	7358.93	347.882	5667.27	262.929	7087.23	162.567	0.963079
	Gle1	NM_028923	731.6	34.1664	955.9	50.0941	737.6	36.2881	920.7	12.9317	0.963176
	Dmtf1	NM_011806	1899.2	107.92	1548.6	31.9093	1901.93	71.0389	1491.8	33.1068	0.963322
	Cdca8	NM_026560	581.167	7.40818	1509.8	102.58	510.567	20.4328	1454.63	25.327	0.963459
	-	NM_175536	221.533	3.4275	300.033	6.94774	263.433	14.0741	289.1	12.1698	0.963561
	Ttk	NM_009445	290.733	34.0501	729	60.8408	272.067	13.3513	702.7	74.8252	0.963923
	Kif24	NM_024241	121.533	5.32677	148.567	2.31036	134.3	4.39242	143.267	2.41132	0.964326
	2810417H13Rik	NM_026515	423.333	9.32958	495.5	28.3373	339.167	15.2215	477.833	28.0185	0.964345
	-	XM_127738	7248.93	134.242	8609.37	116.347	7165.73	80.1491	8306.7	124.199	0.964844
	Mxd3	NM_016662	137.5	7.22311	206.967	14.3035	122.067	2.80258	199.733	18.614	0.965048
	Nde1	NM_023317	1166.27	39.8673	2149.37	74.7402	1074.7	18.8868	2075.27	38.5836	0.965525
	Vrk1	NM_001029843	377.167	2.30531	440.533	18.5681	322.8	8.0575	425.833	19.3868	0.966631
	-	NM_139237	103.467	1.21974	105.7	2.25906	90.7	1.62583	102.3	2.84488	0.967833
	Olfr1083	NM_207564	112.933	3.10501	118.6	0.264575	124.933	0.517473	114.8	1.19304	0.96796
	Mgp	NM_008597	9120.3	288.684	7133.7	331.557	9451.93	712.313	6908.07	161.253	0.968371
	Ccdc77	NM_026028	483.767	41.8953	1077.47	105.377	423.3	8.36122	1043.57	47.414	0.968537
	Hsd3b7	NM_133943	1438.43	62.8434	1038.33	47.851	1395.57	111.149	1006.37	9.14992	0.96922
	Ovgp1	NM_007696	274.7	30.5433	159.233	9.9501	264.067	26.5406	154.5	2.08806	0.970276
	Timeless	NM_011589	1687.2	116.726	1267.6	59.615	1607.7	42.6931	1230.23	41.1058	0.970519
	Nup107	NM_134010	558.6	20.9381	748.2	36.5013	512.5	15.2271	726.467	29.2162	0.970953
	Terf2	NM_009353	465.1	10.9134	634.233	34.5993	479	17.8539	615.833	28.749	0.970989
	Mad2l1bp	NM_025649	370.733	25.1272	517.8	38.7621	343.533	22.7264	502.833	17.4333	0.971095
	Rnf26	NM_153762	252.5	13.1465	376.167	8.12862	245.433	16.3533	365.333	16.7139	0.971199
	Tubb5	NM_011655	26620	389.836	35803.9	1903.34	26622.8	739.986	34785.4	1238.99	0.971553
	-	XM_354977	622.7	27.3535	798.3	2.93655	597.067	18.2009	776.3	50.8011	0.972441
	Tubd1	NM_019756	139.267	1.59199	173.233	6.98435	143.233	2.28789	168.467	1.04775	0.972488
	Tmem218	NM_025464	558.667	48.6053	833.033	41.653	633.133	14.1353	810.4	18.4893	0.972831
	-	XM_354991	140.6	2.38956	121.367	2.71682	123.533	4.69941	118.133	2.60278	0.973354
	Cdkn2c	NM_007671	524.167	0.906152	888.5	53.054	614.7	38.955	865.1	97.6025	0.973663
	Bub1b	NM_009773	970.733	59.8939	1745.47	137.5	780	41.2275	1700.13	62.6606	0.974024
	Eef2k	NM_007908	146.4	5.34072	164.1	2.10317	179.5	5.87963	159.867	2.65477	0.974205
	Gpn3	NM_024216	722.1	18.7673	960.6	22.8685	694.167	30.0347	936.867	34.8573	0.975294
	Mlh3	NM_175337	260.867	7.3051	346.233	9.00691	255.033	5.6746	337.733	20.731	0.97545
	H1fx	NM_198622	311.333	22.3835	435.433	16.9604	334.333	4.28576	424.933	12.9433	0.975886
	Map2k5	NM_011840	429.4	26.806	586.2	20.4395	461.767	24.5008	572.5	18.0001	0.976629
	Stac	NM_016853	159.033	2.15432	142.167	1.35933	146.167	2.6181	139.033	3.32382	0.977956
	Usp54	NM_030180	584.9	24.9129	764.467	2.56732	601.733	14.5511	747.8	35.3215	0.978198
	Prc1	NM_145150	1903.57	119.414	12515.5	421.73	1783.3	213.089	12243.9	390.127	0.978299
	Ncapd2	NM_146171	3494.27	116.058	6032.53	143.691	2769.47	21.6654	5903.03	170.38	0.978533
	Tmem218	NM_025464	234.2	11.0749	326.133	6.89573	246.2	5.20032	319.4	19.3717	0.979355
	Tlcd1	NM_026708	1274.37	49.142	983.867	29.4458	1183.73	18.1599	964.167	15.1392	0.979977
	AI662250	NM_178926	274.6	12.2572	229.133	3.24465	282.233	2.82627	224.6	4.96421	0.980217
	H2afz	NM_016750	22095.4	745.612	25429.8	1319.59	18069.7	1057.06	24931.2	880.103	0.980393
	Hsd3b7	NM_133943	595.8	7.7681	432.633	10.7581	554.6	30.9239	424.3	22.161	0.980739
	Mdm1	NM_148922	258.867	6.24108	369.4	36.4846	232.167	2.30241	362.3	14.2732	0.98078
	Asb3	NM_023906	465.467	11.4601	550	5.51392	456.833	19.3851	539.567	15.3469	0.981031
	Cdk2	NM_016756	566.767	12.5072	405.467	27.8514	488.567	27.2978	398	10.5841	0.981584
	Dpagt1	NM_007875	2469.87	28.2499	2992.03	81.1431	2422.57	33.7321	2937.53	125.45	0.981785
	Zcchc8	NM_027494	1518.07	65.2974	1838	74.8993	1480.03	51.3267	1805.07	39.1725	0.982084
	2610110G12Rik	NM_028476	183.8	6.75154	157.567	4.56703	180.833	3.52247	154.8	3.47707	0.982439
	Ncapd2	NM_146171	451.1	10.4312	718.967	38.4316	353.067	8.09204	706.733	12.0257	0.982984
	Mapkapk3	NM_178907	163.7	4.72476	136.633	5.56697	132.267	1.79103	134.567	5.96024	0.984879
	Nde1	NM_023317	1141.77	26.3202	1757.03	96.4717	1005.57	37.4969	1730.93	76.3218	0.985145
	BC057552	NM_172502	1015.3	23.5611	1373.17	26.7026	1129.6	91.0583	1353.87	48.9234	0.985945
	Ccdc61	NM_001033314	146.433	4.62649	177.333	6.66942	148.1	3.89743	174.867	3.57507	0.986094
	Uap1	NM_133806	997.467	5.90602	767.833	50.1033	930.733	21.5965	757.7	5.50727	0.986803
	Lsm8	NM_133939	6904.67	273.605	7920.07	200.237	6412.03	93.4265	7820.53	76.1507	0.987432
	Fzr1	NM_019757	652.067	27.6087	1787.53	20.2999	696.333	42.9755	1765.67	38.6214	0.987771
	Ptprv	NM_007955	128.167	1.2441	131.233	4.97538	167.867	3.77065	129.767	4.44685	0.988829
	Rsl1d1	NM_025546	5516.47	169.763	5281.6	98.0252	4700.1	60.7711	5223.57	73.9084	0.989013
	Ncapd2	NM_146171	666.633	18.188	1110.07	19.3406	588.133	8.21509	1098.8	40.9103	0.989847
	Bre	NM_181280	525.533	13.9663	668.333	4.99544	549.667	14.6693	661.733	8.43511	0.990125
	Pde6d	NM_008801	471.833	22.9925	706.6	15.4966	550.667	34.3255	699.9	31.3745	0.990518
	Rnf168	NM_027355	932.467	15.6239	571.567	12.6428	743.767	39.6481	566.633	18.599	0.991368
	Zhx3	NM_177263	240.6	8.536	168.233	8.33113	228.167	15.3922	166.833	5.89416	0.991678
	Myo1b	NM_010863	714.967	13.2691	525.9	17.1001	661.6	8.8476	521.833	16.884	0.992267
	Atf7ip	NM_019426	1649.5	49.1227	2518.77	76.2271	1608.43	60.5486	2499.33	45.6847	0.992282
	Nsl1	NM_198654	174.133	1.91514	195.3	6.67258	163.167	2.70329	193.933	3.25184	0.993001
	Nup133	NM_172288	1533.23	75.3014	2109.3	93.9869	1389.27	34.9446	2095.57	15.6355	0.993491
	-	NM_025320	5277.13	23.3667	4390.67	125.542	5168.37	76.2299	4362.43	35.9116	0.993568
	Ppp2r5d	NM_009358	820.8	16.8194	962.233	39.8787	784.833	22.3954	957.567	28.8221	0.995151
	Prkab1	NM_031869	2078.1	36.9257	1555.3	20.8567	1901.07	46.3196	1547.77	28.7223	0.995158
	Ppp2r5e	NM_012024	2085.13	77.4985	2361.07	42.1442	2032.93	17.1664	2351.4	53.7176	0.995904
	Rfc1	NM_011258	1656.4	36.1598	1284.5	18.1612	1571.57	62.6102	1279.37	36.3988	0.996006
	9030625A04Rik	NM_172488	238.2	4.90951	192.767	5.21739	203.967	11.6657	192.067	3.33333	0.996369
	Olfr424	NM_146721	119.533	1.71302	104.167	2.43402	105.4	3.46747	103.8	1.34288	0.996477
	Mcm6	NM_008567	314.133	15.6351	186.233	7.96876	328.467	16.228	185.633	6.09162	0.996778
	BC019943	NM_144927	100.533	6.00481	108.2	1.30128	126.333	1.6272	107.933	0.982061	0.997532
	Heatr3	NM_172757	1191.2	33.922	1007.6	14.7704	1184.7	46.6143	1005.93	11.7032	0.998343
	1110001A07Rik	NM_025377	943.967	25.4339	1874.27	32.8591	875.567	65.1629	1871.5	12	0.998522
	1700020D05Rik	NM_023781	127.5	2.42487	121.4	5.19711	153.5	5.77437	121.333	4.86393	0.999448
	Tnip2	NM_139064	172.067	1.61795	176.933	11.8082	233.9	8.34646	176.867	6.34937	0.999627
	Ubr7	NM_025666	2610.93	121.063	1650.87	57.7821	2212.13	39.105	1650.5	21.6724	0.999776
	Sart3	NM_016926	5811.23	152.23	6645.13	60.5	6235.27	86.8195	6645.27	57.5825	1.00002
	Pnrc2	NM_026383	1990.43	149.742	3925.57	323.261	2175.43	98.709	3926.03	232.944	1.00012
	Cdk2	NM_183417	892.033	53.9461	648.067	40.3944	848.933	21.6775	648.2	13.7027	1.00021
	B230219D22Rik	NM_181278	5198.13	218.287	4141.47	144.16	4652.7	134.844	4147.1	69.4329	1.00136
	LOC100039753	NM_001017394	108.267	3.03388	116.533	3.28346	130.5	3.43123	116.733	2.03497	1.00172
	C230052I12Rik	NM_178643	187.867	7.95997	241.467	3.86106	166.1	4.27551	242	14.0735	1.00221
	Pdk1	NM_172665	550.367	11.6227	396.7	11.6835	469	11.3147	397.667	24.0395	1.00244
	Tmem209	NM_178625	1907.87	31.573	2523.07	81.7555	1992.9	51.8074	2532.07	96.651	1.00357
	6230416J20Rik	NM_173400	1302.33	18.2266	1479.23	47.3895	1094.33	55.5603	1484.6	85.0736	1.00363
	Ftsj2	NM_026510	174.033	3.32282	143.3	3.45881	172.6	0.929157	143.967	3.5338	1.00465
	Ctbp1	NM_013502	131.433	1.27323	111.467	2.9339	116.633	1.4678	112	2.83549	1.00478
	-	XM_147240	225.733	5.98786	175	6.84617	214.8	7.34938	175.867	0.788106	1.00495
	Mvp	NM_080638	2156.33	109.816	1646.93	60.3238	2204.4	89.5798	1655.57	12.6777	1.00525
	Lrrc40	NM_024194	284.1	6.75056	345.133	3.1798	258.5	9.44475	347.133	13.6338	1.00579
	Gstcd	NM_026231	370.767	18.7635	492.9	3.2909	321.167	4.33372	495.767	23.2764	1.00582
	Tspan17	NM_028841	1194.9	53.128	966.633	17.7306	1334.5	51.9605	972.533	35.7693	1.0061
	2610039C10Rik	NM_025642	2105.73	148.512	4626.83	111.104	2002.8	42.8031	4656.17	169.929	1.00634
	-	XM_356076	529.967	19.3124	734.567	39.5084	515.1	15.8218	739.533	11.7339	1.00676
	Snupn	NM_178374	669.267	29.2549	781.267	7.96457	669.067	21.1994	786.567	6.12028	1.00678
	Rbm39	NM_133242	590.6	17.3371	602.867	15.6666	488.5	23.0665	607	4.25245	1.00686
	Hmg20a	NM_025812	551.767	7.9984	617.467	7.0702	512.933	10.6468	621.833	28.129	1.00707
	Nup133	NM_172288	2032.4	23.8917	2909	50.0925	1995.73	32.9829	2931.4	122.849	1.0077
	Plxna2	NM_008882	1085.73	125.98	682.633	13.8927	1168.43	37.9546	688.067	36.9782	1.00796
	Zmat5	NM_026015	518.867	10.6452	613.533	5.0525	644.167	29.9059	619.4	14.4915	1.00956
	Rad1	NM_011232	588	16.6656	672.7	10.1658	545.733	15.7169	679.333	25.3991	1.00986
	Slc35e1	NM_177766	1799.27	138.679	1347.1	30.8851	1794.37	29.9698	1360.73	44.568	1.01012
	Ube2c	NM_026785	286.933	45.2817	2020.87	379.783	263.133	42.1246	2042.23	389.104	1.01057
	Morc3	NM_001045529	1532.7	28.3218	1307.33	46.9086	1478.17	38.111	1321.53	19.5637	1.01086
	Slc19a2	NM_054087	749.667	26.5682	556.967	13.6573	628.033	26.345	563.067	18.4071	1.01095
	Exosc4	NM_175399	1568.97	27.761	1721.33	36.0352	1439.27	47.3424	1741.9	53.2754	1.01195
	Popdc2	NM_022318	106.9	2.51064	109.033	1.57621	123.033	1.10504	110.433	2.53596	1.01284
	Aplf	NM_024251	210.233	8.35969	299	17.0643	206.2	10.2569	302.967	15.3354	1.01327
	Atf4	NM_009716	5187.2	226.244	7039.27	153.718	5186.3	449.106	7136.8	378.954	1.01386
	Lsm2	NM_030597	2729.8	252.913	3758.27	287.856	2421.43	74.0276	3813.1	249.965	1.01459
	Krt80	NM_028770	237.533	1.05883	273.167	6.64087	223.567	5.68311	277.2	12.8829	1.01476
	Gns	NM_029364	4419.17	53.6751	3933.6	83.7151	5116.97	50.0328	3995.23	82.8304	1.01567
	Ythdf1	NM_173761	3053.67	14.6498	3285.73	102.543	2917.6	25.3563	3339.1	59.2666	1.01624
	F630043A04Rik	NM_198605	429.267	45.0696	934.467	39.8717	356.533	25.8031	950.733	35.1789	1.01741
	Wdfy1	NM_027057	187.533	7.44879	200.767	7.59481	248.5	8.22456	204.633	4.62073	1.01926
	-	NM_011524	319.367	34.9259	567.533	52.9719	283.233	31.8855	578.567	69.5316	1.01944
	Mrpl35	NM_025430	335.433	14.5567	388.867	2.29298	304.633	9.7554	396.633	1.95477	1.01997
	Sf4	NM_027481	2199.4	95.447	2441.9	39.6548	2752.27	10.6164	2491.3	83.273	1.02023
	Cstf3	NM_145529	2078.93	51.4033	2830.4	189.914	2403.53	44.6798	2887.7	99.1108	1.02024
	Sod2	NM_013671	6170.2	78.1774	5195.8	217.052	5788.83	54.5915	5302.57	67.1721	1.02055
	Prkaa2	NM_178143	108.1	1.5695	106.133	2.71375	118.433	1.28106	108.333	1.11405	1.02073
	Xrcc1	NM_009532	981.867	79.3192	1399.5	89.3311	980.467	41.6766	1428.87	57.6168	1.02099
	Agxt2l2	NM_028398	552.167	11.2673	499.3	32.6229	645.2	15.6981	510.1	15.1414	1.02163
	Hnrpll	NM_144802	4261.8	34.0679	3455.6	145.385	4082.93	178.305	3531.7	86.8433	1.02202
	Grlf1	NM_172739	748.367	15.4994	640.733	39.8751	844.033	20.4672	654.933	34.4978	1.02216
	Ubr7	NM_025666	2481.23	67.1695	1511.07	111.437	1933.37	40.6367	1544.57	39.6618	1.02217
	Uck2	NM_030724	6244.47	197.043	4958.3	188.468	6179.17	125.667	5069.97	276.389	1.02252
	Fam110a	NM_146127	180.1	7.64221	263.5	7.65789	177.5	3.3005	269.533	10.1943	1.0229
	Apobec3	NM_030255	431.767	23.8055	570.933	8.29826	413.567	12.2382	584.3	20.3913	1.02341
	Jak2	NM_008413	894.833	60.2891	621.333	33.3823	801.933	38.6406	636.633	21.9636	1.02462
	Fbxl4	NM_172988	294.833	11.6559	240.467	4.33295	305.933	11.5021	246.833	10.8593	1.02647
	Psrc1	NM_019976	126.433	6.14121	185.667	8.63353	119.533	1.15518	190.6	7.23971	1.02657
	Zfp467	NM_020589	429.3	15.8973	352.233	21.0917	504.133	17.2327	361.833	5.54417	1.02725
	Taar9	NM_001010831	117.833	3.28448	99.8333	0.392994	105.8	2.69629	102.633	1.54092	1.02804
	Siah1b	NM_009173	418.233	2.14813	482.4	23.8076	373.5	6.63425	496.867	5.44712	1.02999
	Rangap1	NM_011241	8235.1	252.848	12820.2	101.509	7435.33	254.234	13212	60.1667	1.03056
	Blm	NM_001042527	815.7	32.0865	1286.3	51.1501	673.433	35.0269	1325.67	11.3132	1.03061
	Cwf19l2	NM_027545	665.867	32.8167	800.267	16.6454	685.433	23.5481	824.767	18.7853	1.03061
	Srpk3	NM_019684	116	0.503322	117.867	3.28346	144.1	0.5	121.533	0.674125	1.0311
	Blm	NM_007550	842.767	10.4769	1358.43	71.5398	774.4	28.9968	1400.8	47.7398	1.03119
	Wbp11	NM_021714	5171.47	85.0608	6434.53	161.216	5089.67	65.275	6637.57	219.226	1.03155
	Cdt1	NM_026014	4773.37	102.438	2669.8	137.233	4320.8	167.761	2755.6	134.867	1.03214
	Cnksr3	NM_172546	192.4	2.38607	170.633	4.60085	215.1	8.0829	176.133	8.45426	1.03223
	Arsj	NM_173451	114.267	2.81504	120.367	2.50355	142.567	4.66988	124.3	0.83865	1.03268
	Tubb6	NM_026473	11309.6	388.939	17400.9	594.635	10271.5	981.812	17977.5	701.335	1.03314
	Nup43	NM_145706	1323	60.3684	1558.17	40.7949	1242.2	56.843	1610.83	55.7783	1.0338
	Ripk1	NM_009068	844.2	32.6151	633.8	17.6823	833.5	14.1677	655.467	20.4992	1.03419
	Prdx3	NM_007452	1782.03	49.4964	1447.3	15.8052	1470.67	67.7263	1496.83	43.4428	1.03422
	Spc24	NM_026282	346.333	16.8836	538.6	22.1992	305.4	11.3606	557.267	16.1817	1.03466
	H1f0	NM_008197	843.2	54.5419	1987.63	124.442	1018.9	66.0359	2058.8	327.614	1.03581
	-	NM_146186	158.967	2.71682	191.9	1.5695	149.033	8.03043	198.933	13.263	1.03665
	Dlgap5	NM_144553	644.967	27.2505	1615.1	38.6231	550	11.1132	1674.33	25.692	1.03667
	Ctsk	NM_007802	119.633	5.1174	119.6	4.16053	149.9	5.33135	124	3.76431	1.03679
	Gpn1	NM_133756	945.967	26.8272	1118.73	17.9426	1031.87	17.7961	1160.07	25.0247	1.03695
	Slc28a3	NM_022317	139.767	1.06823	130.167	0.578312	144.267	0.717248	135	3.20364	1.03713
	Sfmbt1	NM_019460	185.1	9.65212	137.1	4.39242	145.333	6.60614	142.233	6.4677	1.03744
	Med4	NM_026119	972.833	36.2779	1398.77	62.7395	941.9	26.7582	1451.43	37.939	1.03765
	Cstf3	NM_177253	1895.67	54.6325	1589	4.64866	1914.23	60.6306	1649.77	69.1117	1.03824
	Cdk2	NM_016756	2355.67	92.9165	1773.77	71.6425	2184.63	80.3963	1844.73	54.1	1.04001
	Pax2	NM_011037	100.967	1.96158	93.6333	3.12748	108.067	0.185592	97.5667	1.32958	1.04201
	Pqlc1	NM_025861	1852.43	40.0562	1380.83	53.9756	1747.5	27.7752	1439.1	23.5313	1.0422
	Ifitm5	NM_053088	120.967	1.79382	121.533	0.868588	136.733	2.81089	126.8	1.27017	1.04334
	Ubr7	NM_025666	540.1	13.1458	351.967	7.78039	411.833	11.3257	367.5	3.40783	1.04413
	Olfr571	NM_147085	130.433	1.7901	137.833	2.11371	119.667	2.67104	143.933	5.0762	1.04426
	-	NM_025880	1086	34.5704	796.567	15.5898	1103.43	27.48	833.033	23.7295	1.04578
	Siah1b	NM_009173	234.6	3.72424	282.5	3.32014	238.467	16.9558	295.667	0.648931	1.04661
	Slco2a1	NM_033314	1268.23	27.2741	914.3	53.5832	1258.73	86.8915	957.667	60.638	1.04743
	-	XM_484305	2350.2	76.4482	1800.33	73.1085	2655.27	72.1203	1886.67	13.6446	1.04796
	-	NM_033075	2203.77	144.626	3201.43	202.757	2132.4	99.073	3356.73	163.26	1.04851
	Abcb10	NM_019552	328.167	12.5555	265.533	14.7243	354.267	9.32208	278.6	2.25019	1.04921
	Tmem59	NM_029565	2382.9	112.864	2028.73	52.9244	2593.4	31.184	2129.8	27.0113	1.04982
	Paip2b	NM_146169	3458.33	56.3015	4045.77	34.3153	3310.07	115.585	4253.57	155.963	1.05136
	Tmem160	NM_026938	1908.4	55.7	1856.5	10.4543	2261.93	34.5796	1952.2	47.486	1.05155
	Atl3	NM_146091	503.8	20.351	377.867	10.8419	548.167	8.88826	397.4	14.3263	1.05169
	Epm2aip1	NM_175266	676.767	31.3338	718	34.5588	914.433	23.0969	756.933	20.4133	1.05422
	Ckap2l	NM_181589	344.467	7.87831	1053.87	86.0641	303.433	21.0272	1112	22.117	1.05516
	Ccne1	NM_007633	981.433	10.2236	487.967	9.90191	835.967	85.1397	515	22.4729	1.0554
	E2f1	NM_007891	1827.63	113.18	733.233	14.3388	1585.27	142.711	774.167	1.14066	1.05583
	Pdlim2	NM_145978	593.6	13.5244	696.967	11.9942	765.2	32.491	736.233	19.1714	1.05634
	Slc7a2	NM_007514	149.7	4.29302	155.367	5.91786	182.2	1.44222	164.133	2.63333	1.05642
	Ndc80	NM_023294	1023	34.9293	2627.37	116.607	912.133	27.697	2777.23	97.4333	1.05704
	Ube2t	NM_026024	244.767	10.7172	572.033	77.0764	241.6	7.35278	604.9	52.0205	1.05746
	2610021K21Rik	NM_030172	161.6	6.23859	206.1	9.98349	133.733	1.76383	218.1	6.83691	1.05822
	Cdkal1	NM_144536	749.333	60.7054	1050.13	41.5807	770.9	11.8655	1113.2	19.1286	1.06006
	Gtdc1	NM_172662	378.767	13.5732	515.967	31.0843	408	18.6977	547.133	22.0344	1.0604
	-	XM_127436	1891.9	77.2457	2384.37	60.2933	2089.27	15.2934	2529.37	119.137	1.06081
	Ryr1	NM_009109	128.933	2.20404	115.333	1.21427	138.767	2.25191	122.367	4.8841	1.06099
	Spc25	NM_025565	861.367	39.456	3260.8	137.869	898.6	18.4218	3459.93	48.8257	1.06107
	Trim68	NM_198012	113.933	4.41752	116.333	1.85233	134.4	2.99388	123.467	1.86577	1.06132
	Lrpap1	NM_013587	1408.1	27.246	1280.7	26.3143	1694.4	44.4444	1359.37	13.1497	1.06143
	Notum	NM_175263	172.7	7.30502	128.833	1.08372	171.667	8.07988	136.833	3.10125	1.0621
	Ccdc43	NM_025918	1334.17	27.7087	1569.93	44.205	1284.33	24.7461	1668.83	47.6523	1.063
	Reg3d	NM_013893	90.6667	0.874325	87.6333	1.71885	104.6	1.07858	93.1667	1.96497	1.06314
	Tle6	NM_053254	488.533	44.0903	461.6	33.8353	674.733	18.0343	490.767	15.0776	1.06319
	Ate1	NM_013799	1382.7	35.2407	1855.03	104.275	1586.53	73.5766	1973.57	40.068	1.0639
	Rif1	NM_175238	680.567	36.946	432.833	17.4368	565.433	32.214	460.733	36.0722	1.06446
	Pde6d	NM_008801	460.7	7.17101	596	36.6765	441.933	29.5926	634.5	39.2398	1.0646
	Nphp4	NM_153424	189.5	2.02978	232.867	2.97564	234.233	9.58981	248	4.64866	1.06499
	AI597468	NM_001013028	1040.8	67.0883	750.833	46.8912	1101	20.8545	799.7	53.327	1.06508
	Fam131a	NM_133778	237.9	4.98029	198.433	2.08513	266.833	12.1229	211.4	3.55715	1.06535
	Slc7a4	NM_144852	251.333	3.78432	194.367	7.27194	312.967	7.6486	207.1	9.73362	1.06551
	Spc25	NM_025565	917.3	23.7921	3328.5	110.26	893.867	34.9014	3547.87	94.8596	1.06591
	Lmnb1	NM_010721	3400.5	224.85	4575.53	150.903	3672.8	159.503	4880.93	155.145	1.06675
	Zfp367	NM_175494	642.6	24.1349	420.033	9.80499	568.5	46.0272	448.167	2.75096	1.06698
	Cenpm	NM_178269	240.833	5.44712	286.967	12.0231	235.467	8.51163	306.233	9.09145	1.06714
	Spnb2	NM_009260	1015.43	16.2782	846.5	58.7326	1175.27	56.5638	903.367	14.1634	1.06718
	Cep120	NM_178686	1175.47	104.847	1509.1	31.3838	1179.43	23.4717	1611.23	86.3226	1.06768
	Prpf31	NM_027328	152.067	3.44206	140.333	1.91949	165	3.45977	149.867	3.32382	1.06794
	Sgol1	NM_028232	178.967	15.7878	341.633	39.9688	170.733	16.32	364.867	45.1354	1.06801
	Pak4	NM_027470	1376.13	5.78686	1684.63	80.04	1337.17	45.0644	1799.37	45.7285	1.06811
	Znhit3	NM_001005223	830.6	27.3571	1007.87	50.6223	872.133	30.6444	1077.2	15.9713	1.06879
	Hist2h3b	NM_019469	7746	269.773	10707.9	644.726	9559.03	337.583	11448.1	485.214	1.06913
	-	NM_026889	567.2	9.79303	687.533	12.9982	542.533	1.66966	735.3	24.3284	1.06948
	Npdc1	NM_009849	125	1.00664	128.267	4.96801	156.933	5.49586	137.2	3.49619	1.06964
	Cited2	NM_010828	294.033	6.06227	231.1	8.51587	271.467	4.25219	247.267	11.3492	1.06996
	Cry1	NM_007771	103.167	2.11844	95.3	1.31149	89.5667	1.46553	102.033	0.466667	1.07065
	Eri3	NM_080469	247.3	5.43078	265.833	3.43721	278.733	8.3579	285.2	2.0306	1.07285
	Suv39h1	NM_011514	331.467	22.1129	453.833	16.7167	328.633	7.32947	486.967	29.5402	1.07301
	Zfyve1	NM_183154	255.467	3.83898	295.733	7.6038	329.267	4.96667	317.433	5.48948	1.07338
	Gm347	NM_001005420	442.333	56.3477	256.467	10.3655	443.967	17.6123	275.333	13.5359	1.07356
	Rrm2	NM_009104	1260.77	50.1633	946.133	44.0316	1013.67	32.8291	1015.9	34.272	1.07374
	Ccdc46	NM_029606	198.667	11.4346	247.767	13.7783	189.567	6.64764	266.167	14.8532	1.07426
	Zwilch	NM_026507	181.633	8.30288	255.4	8.55005	194.333	10.9972	274.5	13.8921	1.07478
	Slc5a5	NM_053248	108.233	1.45182	118.833	3.59738	140.833	6.55371	127.767	1.63333	1.07518
	BC066028	NM_001001180	138.167	3.13174	131.967	0.96148	154.2	4.2548	142	1.45258	1.07603
	Scye1	NM_007926	6704.23	112.03	7860.13	294.688	6895.47	74.5466	8459.07	181.912	1.0762
	Pfdn2	NM_011070	4195.57	83.6997	4281.3	64.7988	4996.5	58.4084	4610.17	91.4903	1.07682
	Zc3h12b	NM_001034907	113.333	1.5857	111	1.79258	140.333	6.69735	119.567	3.99764	1.07718
	Acer3	NM_025408	1213.8	40.8975	927.2	17.8	968.1	32.0101	998.933	29.7772	1.07737
	Anpep	NM_008486	158.6	0.7	130.9	3.29596	170.7	4.0129	141.1	4.55302	1.07792
	Tmem42	NM_025339	386.9	9.93529	318	9.34077	406.1	14.6738	342.867	14.6731	1.0782
	Ddx20	NM_017397	3959.63	240.694	4835.2	43.7951	3277.17	254.453	5213.5	152.396	1.07824
	Plk4	NM_011495	1183.03	3.60386	2412.17	129.474	1029.1	105.251	2601.97	147.765	1.07868
	Mknk2	NM_021462	1950.17	48.9119	1582.9	38.1146	2098.7	15.5513	1707.6	27.2138	1.07878
	D330028D13Rik	NM_172727	182.867	6.02117	138.9	9.53887	181	6.35059	149.867	4.6477	1.07896
	Ilf2	NM_026374	7459.97	295.134	8668.63	154.961	6410.1	118.817	9358.73	457.489	1.07961
	Hoxa5	NM_010453	292.533	13.2296	221.4	10.1096	287.567	9.15539	239.067	4.81191	1.0798
	Smtn	NM_013870	375.9	30.5413	751.533	46.9601	493.333	19.7844	811.967	24.4247	1.08041
	Prdx2	NM_011563	13185.7	604.376	12218.3	354.55	16220.5	584.314	13204.8	426.496	1.08074
	-	NM_025880	1227.5	108.369	880.467	26.2827	1278.13	18.2194	951.8	56.9042	1.08102
	Ccdc66	NM_177111	240.033	16.2214	317.667	7.33424	274.5	16.1581	343.6	4.39659	1.08164
	2410022L05Rik	NM_025556	874.933	27.8737	729.333	9.20966	946.167	18.8865	789.133	29.0196	1.08199
	9430015G10Rik	NM_145557	298.667	49.2248	485.167	45.5196	318.6	10.7058	525.167	9.35598	1.08245
	Cdkn2aipnl	NM_029976	2316.9	59.615	2630.3	52.2989	2216.17	81.5289	2847.23	134.228	1.08247
	Itga9	NM_133721	158.467	7.03096	163.467	4.53076	207.467	3.46234	177	4.48144	1.08279
	Slc4a1ap	NM_009206	946.2	14.9241	1183.7	53.559	1037.87	39.5951	1282.1	23.5918	1.08313
	Aaas	NM_153416	243.8	2.51661	282.133	11.0339	208.667	15.9303	305.733	5.8749	1.08365
	Tube1	NM_028006	175.3	10.7686	218.867	1.92209	177.2	8.51959	237.233	4.14662	1.08391
	Btg4	NM_019493	134.3	5.91805	215.833	7.66254	145.867	4.21756	234.067	9.92981	1.08448
	D030056L22Rik	NM_177640	2862.77	143.635	4154.8	289.063	3110.97	82.9562	4507.8	123.711	1.08496
	Rnf181	NM_025607	3133.47	179.416	3870.67	209.248	3082.33	106.054	4201.6	61.3964	1.0855
	Bnip3l	NM_009761	2696.47	140.065	2151.6	120.873	3126.9	101.294	2336.1	24.7574	1.08575
	Pold3	NM_133692	942.8	55.403	686.933	17.1375	826.067	4.25846	745.967	37.157	1.08594
	Tcf25	NM_001037878	5144.43	150.353	5292.93	42.4598	5863.63	117.384	5749.17	79.6608	1.0862
	Mcm6	NM_008567	3490.43	323.474	1791.83	170.086	3637	164.299	1947.23	61.5578	1.08673
	Il15ra	NM_133836	109.3	0.945163	115.4	3.53883	132.267	4.29935	125.533	2.34473	1.08781
	Clip4	NM_030179	283.833	15.4528	247.7	9.95339	366.733	15.0282	269.6	11.2787	1.08841
	Cnnm2	NM_033569	671.5	30.2179	597.1	18.7561	788.967	20.2776	650.567	14.6936	1.08954
	Ttc39c	NM_028341	199.633	5.35734	174.2	3.05123	221.2	7.0713	189.833	0.983757	1.08974
	Hn1	NM_008258	4556	260.572	6586.3	212.792	5002.43	325.769	7186.3	242.716	1.0911
	Agap2	NM_001033263	120.767	0.898765	115.633	1.96497	118.467	0.371184	126.2	1.00167	1.09138
	Ftsj1	NM_133991	205.867	9.89248	243.567	7.5351	210.567	11.7906	265.867	2.01191	1.09156
	Pde6d	NM_008801	577.833	24.2862	777.3	20.854	623.667	42.127	848.9	48.4042	1.09211
	-	NM_144864	436.067	29.8811	674.867	44.5442	563.567	18.0038	737.033	14.7388	1.09212
	1700022C21Rik	NM_029602	288.333	23.7623	375.9	11.5487	318.067	12.6254	410.567	19.8065	1.09222
	1110007L15Rik	NM_026269	1621.63	45.2849	1398.87	29.0035	1776.43	32.662	1528.83	67.2224	1.0929
	-	XM_127129	235	6.26019	245.5	2.45832	321.467	12.5688	268.367	11.1705	1.09314
	Gtpbp2	NM_019581	1456.97	212.198	2290.23	86.3336	2121.23	50.7429	2504	81.2157	1.09334
	Ccdc61	NM_001033314	240.1	2.96873	343.167	15.3912	252.9	7.86193	375.2	4.19325	1.09335
	-	XM_139474	18356.2	534.354	21988	420.325	18962.2	1197.43	24050.8	911.862	1.09381
	Dgat2	NM_026384	323.267	5.23906	286.9	4.95412	342.9	10.9986	314.167	7.22319	1.09504
	Fat4	NM_183221	108.6	3.74344	118.6	5.67215	136.467	3.09049	130.033	1.63333	1.0964
	-	NM_026889	1890.47	39.9815	2532.23	92.1018	2054.2	24.8687	2777.17	19.3196	1.09673
	Trim59	NM_025863	1484.97	86.7547	2233.53	182.73	1526.87	111.897	2450.17	38.0333	1.09699
	Pde6d	NM_008801	866.133	31.5164	1124.73	61.7614	907	58.5277	1234.17	43.4131	1.0973
	Wnt5b	NM_009525	159.467	2.33975	133.767	1.64249	159.433	1.8415	146.833	4.73369	1.09768
	0610010K14Rik	NM_026757	527.1	12.2132	605.167	12.2182	554.6	32.8051	664.4	9.09084	1.09788
	Tef	NM_017376	863.6	81.7304	758.8	8.50647	1077.7	11.5725	833.633	29.0146	1.09862
	Opa3	NM_207525	612.1	28.4388	805.1	18.0511	685.533	43.8796	884.533	44.5975	1.09866
	Cdca7	NM_025866	6927.63	102.141	3583.13	298.531	6545.7	135.358	3937.67	174.196	1.09895
	Snx16	NM_029068	513	32.2228	360.533	8.65262	532.967	12.1565	396.267	7.56689	1.09911
	Cdc42ep4	NM_020006	522.067	1.93247	666.833	44.9412	597.667	13.4752	732.933	15.2602	1.09913
	Pxmp3	NM_008994	2207.57	48.6575	1774.47	22.5324	2408.3	110.305	1951.07	34.8073	1.09952
	Capsl	NM_029341	91.9	4.62277	109.333	3.57833	113.6	4.75009	120.233	1.1392	1.0997
	Smtn	NM_013870	128.333	4.10623	171.833	6.363	140.1	5.40494	188.967	9.40006	1.09971
	Rnf181	NM_025607	720.9	19.7289	948.233	65.6043	701.3	1.35277	1043.63	44.616	1.10061
	Oplah	NM_153122	237.6	8.0206	209.6	13.1571	281.767	9.51846	230.7	8.00333	1.10067
	Prpf38a	NM_172697	2701	53.0348	3442.13	82.8903	3166.4	33.93	3789.7	264.268	1.10098
	-	XM_109794	211.333	7.10923	208.5	10.7037	278.467	6.30141	229.567	8.74115	1.10104
	Fmnl3	NM_011711	2624.23	91.2697	2100.93	73.2838	2865.73	109.852	2314.4	48.9659	1.10161
	-	NM_178236	317.9	3.86825	245.633	16.7043	299.4	8.03513	270.633	5.04953	1.10178
	Fam40b	NM_001037740	174.9	0.665833	155.7	4.30155	149.833	4.3414	171.567	1.50591	1.10191
	Mmab	NM_029956	215.867	1.02686	268.9	8.45064	269.2	1.42244	296.367	14.7216	1.10215
	C1rl	NM_181344	130.233	1.40515	126	4.66083	148	2.85715	138.9	2.8589	1.10238
	-	NM_011368	12106.2	147.156	10990.1	181.934	13827.2	266.096	12115.7	257.076	1.10242
	Ccdc130	NM_026350	853.9	20.4123	1066.57	41.0789	1010.73	46.7935	1176.4	44.9163	1.10297
	Tbl2	NM_013763	540.567	44.8167	709.633	45.0753	562.533	12.6196	783.133	16.2465	1.10357
	Sec16b	NM_033354	339.167	6.69859	391.6	2.34592	451.133	2.64344	432.2	14.7453	1.10368
	-	NM_028726	135.167	2.373	130.1	3.38083	160.867	4.57396	143.633	5.53785	1.10402
	-	XM_129987	205.733	13.3678	179.3	5.9079	297.833	29.5452	197.967	4.14501	1.10411
	Paf1	NM_019458	401.833	11.6296	465.2	11.2824	493.533	7.48829	513.733	20.2667	1.10433
	Mad2l1	NM_019499	2481.7	85.2245	4505.9	156.872	2366.3	92.8518	4984.4	68.6145	1.10619
	Cklf	NM_029295	105.6	1.72434	94.6667	0.808977	98.7667	2.02841	104.733	1.10202	1.10633
	Mcm6	NM_008567	1892.5	66.4379	829.5	59.0343	1714.07	27.6978	918.633	44.0403	1.10745
	Olfr38	NM_146986	113.533	2.47274	112.533	3.85242	128.633	2.43607	124.667	0.866667	1.10783
	Rfc4	NM_145480	2386.27	139.068	3019	127.304	2392.17	34.5213	3345.57	107.54	1.10817
	Uqcc	NM_018888	2180.43	66.6391	2365.73	58.4307	2596.53	34.7761	2623.77	20.8687	1.10907
	Pfn2	NM_019410	679.567	52.9546	537.933	16.8626	798.6	22.6169	596.667	18.3639	1.10918
	Kdm4b	NM_172132	1190.4	31.1622	1252.3	54.7984	1655.8	87.4406	1389.3	60.5612	1.1094
	Smtn	NM_013870	503.6	14.4503	1005.07	81.5755	635.233	22.7393	1115.57	35.8364	1.10994
	Arhgef2	NM_008487	729.6	42.6913	869.967	14.3225	781.033	21.4548	966.033	19.0737	1.11042
	Gpr156	NM_153394	107.1	1.18462	118.6	1.33167	119.7	1.59478	131.733	2.4835	1.11073
	Ppapdc1b	NM_028000	880.7	49.6952	662.8	11.658	949.367	7.1966	736.267	11.6905	1.11084
	Nkain1	NM_025998	209.5	8.80019	196.633	6.6021	274.367	14.6438	218.6	12.8827	1.11172
	B930041F14Rik	NM_178699	311.767	6.36195	202.7	7.56042	341.033	18.0845	225.567	2.5208	1.11281
	Tmem168	NM_028990	126.167	1.78357	135.267	5.34862	150.067	3.32783	150.533	2.4538	1.11286
	Rgma	NM_177740	381.7	10.0351	407.267	22.5386	535.233	23.2652	453.233	11.3079	1.11286
	Dlgap4	NM_146128	443.567	17.808	483.067	15.766	566.833	4.88342	538.133	16.287	1.11399
	Lsm3	NM_026309	3793.1	127.063	5528.37	292.995	3378.23	70.8542	6159.47	248.485	1.11416
	Tmem77	NM_026013	432.867	35.535	558.1	27.105	554.567	6.50367	622.3	15.4442	1.11503
	Arhgap17	NM_144529	2084.67	104.717	1746.4	56.2562	2474.73	147.481	1948.73	60.2814	1.11586
	Rbm42	NM_133693	3343.57	64.7471	3477	109.27	4108.27	36.0236	3882.23	8.13333	1.11655
	Psme4	NM_134013	4827.23	257.233	4458.9	7.20278	5568.73	106.264	4981.2	116.685	1.11714
	Depdc6	NM_001037937	167.933	9.79223	122.6	3.90683	136.433	1.48922	137	0.818535	1.11746
	Sec61b	NM_024171	1975.13	103.47	1948.77	3.46715	2444.43	47.5604	2177.9	57.4422	1.11758
	Wdr70	NM_001081402	319.267	9.28302	360.2	13.308	317.533	5.73217	402.933	11.6104	1.11864
	Gamt	NM_010255	406.8	10.1887	313.867	25.6335	541.5	15.273	351.367	28.6859	1.11948
	Elf2	NM_023502	225.7	8.39186	205.733	7.11087	261.967	5.26793	230.433	8.04515	1.12006
	Adprh	NM_007414	3795.93	65.8729	4855.1	156.11	4850.13	43.9305	5440.17	226.985	1.12051
	-	XM_283205	271.4	7.36365	332.7	5.51936	273.667	6.87273	372.867	11.7121	1.12073
	Erp29	NM_026129	7042.6	332.485	6159.23	195.202	8193.1	178.131	6903.77	69.98	1.12088
	Snx11	NM_028965	1004	53.1711	1291.43	60.3258	1199.47	59.3271	1448.13	45.2035	1.12134
	Smg7	NM_001005507	1790.33	31.0789	1712.53	28.463	2045.1	39.2491	1920.33	72.591	1.12134
	-	XM_355436	140.8	1.91398	147.867	8.30549	177.267	5.8299	165.9	2.3516	1.12195
	-	XM_134227	208.833	3.89244	213.433	5.69103	261.233	10.0735	239.767	6.28552	1.12338
	Cog4	NM_133973	759.833	27.3179	632.033	28.9662	862.033	41.3151	710.033	4.12526	1.12341
	Slc7a7	NM_011405	143.333	8.45406	168.833	2.09311	169.433	1.01708	189.7	2.99388	1.1236
	Abtb1	NM_030251	321.6	10.2021	312.367	2.22136	433.467	13.4107	351	25.5508	1.12368
	Oasl1	NM_145209	141.233	6.33754	161.5	4.61988	148.033	7.49429	181.567	2.66917	1.12425
	Sec61b	NM_024171	1076.9	48.2725	1136.97	25.0536	1452.67	63.1111	1278.9	19.9188	1.12483
	Palm	NM_023128	340.233	13.4205	312.9	10.5432	425.233	15.8048	352.067	8.73543	1.12517
	Sfrp2	NM_009144	132	5.58241	134.433	6.10637	164.933	5.27457	151.367	1.18369	1.12597
	Mapt	NM_010838	160.033	0.48074	173.133	4.60447	215.833	4.93874	194.967	6.64488	1.12611
	Myh11	NM_013607	99.4	4.07962	105.1	1.11355	124.233	3.40702	118.367	1.10202	1.12623
	Cyp27a1	NM_024264	117.033	1.90992	120.967	2.29298	126.8	2.07445	136.267	3.4973	1.12648
	Mrps31	NM_020560	1363.57	47.8319	1721.4	29.6155	1609.53	73.0275	1939.63	45.3358	1.12677
	Ern2	NM_012016	124.7	2.70247	120.033	2.23632	137.833	0.825295	135.267	2.54646	1.12692
	Tmpo	NM_011605	1656.1	50.8269	2398.9	201.471	1890.07	19.7283	2704.47	41.1368	1.12738
	Prex2	NM_001033636	179.133	2.69959	185.3	2.89194	173.5	5.75529	208.967	1.29914	1.12772
	Ctdsp2	NM_146012	3234.2	149.24	2648.4	108.92	3712.8	120.495	2987.83	153.288	1.12816
	Aqp5	NM_009701	833.1	79.1506	1210.47	49.9128	965.267	65.5872	1365.8	28.1202	1.12832
	Mobkl2b	NM_178061	148.1	9.79047	156.5	1.35031	193	6.40859	176.6	4.83839	1.12843
	Pcbp1	NM_011865	8674.83	289.417	9513.5	237.142	9399.47	209.968	10736.6	271.342	1.12856
	Pde4d	NM_011056	288.367	16.2704	353.533	12.436	355.767	14.9693	399.067	12.3478	1.1288
	Ercc5	NM_011729	864.867	9.22719	921.933	7.25266	999.033	16.3554	1040.8	25.4443	1.12893
	Six5	NM_011383	192.9	5.25389	167.967	7.43871	227.233	7.26873	189.7	3.82143	1.12939
	Fbxw8	NM_172721	767.6	23.7462	696.2	20.6459	908.933	15.0617	786.667	12.6676	1.12994
	Abcd1	NM_007435	206.1	2.25019	169.767	5.84732	209.167	0.417665	191.833	4.03911	1.12998
	Supt5h	NM_013676	1315.43	6.2336	1203.97	35.176	1531.63	52.8638	1361.93	41.8331	1.1312
	Tmem77	NM_026013	296.833	14.8613	330.867	10.1785	346.133	4.8841	374.3	7.89958	1.13127
	Cdk5rap2	NM_145990	437.133	12.2367	646.8	27.3007	520.9	24.3562	731.767	40.0294	1.13137
	2610305D13Rik	NM_145078	126.8	0.665833	125.467	3.48441	125.833	1.94279	141.967	0.611919	1.13151
	Pja2	NM_144859	3389.13	40.881	3046.17	42.1753	4162.53	173.73	3450.43	39.2218	1.13271
	Vat1	NM_012037	910	34.0554	788.267	8.4582	1122.1	34.6425	893.267	20.1334	1.1332
	Cdk5rap1	NM_025876	632.233	17.2157	753.333	9.69284	712.2	9.90471	854.133	35.6487	1.13381
	Pln	NM_023129	104.8	2.67644	96.7333	1.89766	101.567	0.606447	109.733	1.03976	1.13439
	Gprc5c	NM_147217	127.1	2.18251	135.633	2.92366	181	2.65393	153.9	8.64349	1.13468
	Agtrap	NM_009642	634.767	19.0577	605.767	11.2584	764.5	26.604	687.833	16.084	1.13547
	Golga2	NM_133852	1439.4	82.5967	1357.8	73.4369	1819.3	30.985	1543.33	62.3904	1.13664
	5133400G04Rik	NM_029485	399.467	20.698	477.633	15.3646	429.567	19.2167	543.1	3.98372	1.13707
	Spon2	NM_133903	349.8	8.94725	270.733	25.2496	483.733	34.4592	307.867	7.51273	1.13716
	Itfg2	NM_133927	608.267	19.2563	788.767	26.2007	700.767	39.4539	897.133	57.3666	1.13739
	Bscl2	NM_008144	2551.83	71.8469	2088.13	78.4236	3122.93	155.371	2375.1	19.7794	1.13743
	Spcs1	NM_026911	16643.1	482.829	16524.7	272.293	19736.9	425.144	18801.1	608.819	1.13776
	Atg5	NM_053069	1159.3	11.756	1229.6	34.3075	1312.23	21.8557	1399.97	38.3133	1.13856
	Olfr1181	NM_001011816	117.933	1.3691	114.2	3.11929	110.367	1.32958	130.067	2.99462	1.13894
	Ung	NM_011677	228.1	12.3391	109.4	1.24231	203.867	6.42322	124.633	1.83151	1.13924
	Mcm6	NM_008567	4182.17	264.412	1849.07	139.78	3944.8	64.8909	2106.83	140.827	1.1394
	Rai12	NM_018740	213.233	7.19776	238.567	7.27835	240.6	5.2	271.967	6.5006	1.14
	Gpn1	NM_133756	2287.33	26.3011	2494.57	106.373	2292.67	71.9899	2844.67	106.202	1.14034
	Tmem107	NM_025838	536.5	44.9179	609.533	11.0746	517.267	14.2391	696	10.3467	1.14186
	D2Ertd391e	NM_145528	586.267	28.8571	567.4	6.31374	698.167	6.22477	647.967	6.14609	1.14199
	Ift122	NM_031177	562.133	9.27907	555.1	12.9701	744.967	14.7642	634.633	26.01	1.14328
	3110040N11Rik	NM_026077	147.167	1.96497	145.267	6.21298	180.2	4.65009	166.133	3.67892	1.14364
	Nxn	NM_008750	10471.7	535.613	10224.1	194.178	13686.8	256.246	11706.2	563.837	1.14496
	Ftsj1	NM_133991	255.967	14.4859	285.6	5.63205	271.433	6.09763	327.5	4.60326	1.14671
	Aldh2	NM_009656	12315	372.478	11017.4	284.409	14970.8	544.853	12635.5	801.988	1.14687
	Nr2f2	NM_183261	369.633	13.547	381.733	18.7812	486.533	9.13242	438.067	16.4638	1.14757
	Slc4a2	NM_009207	2060.17	81.8893	2211.17	73.6094	2526.43	77.9703	2542.23	38.5156	1.14972
	Exosc1	NM_025644	4147.3	88.7993	4815.3	133.511	4762.53	209.943	5536.97	98.1573	1.14987
	-	XM_354690	165.8	6.40937	271.933	18.5315	141.867	9.15429	312.933	16.3306	1.15077
	Cebpb	NM_009883	7076.2	295.431	8914.9	650.947	7937.23	243.329	10261.6	226.759	1.15106
	Arnt	NM_009709	285.067	13.4829	320.3	2.72091	338	8.57671	368.733	14.2813	1.15121
	Adam21	NM_020330	101.267	0.392994	102.967	0.883805	103.133	2.3877	118.633	3.39477	1.15215
	-	XM_127861	442.8	28.318	622.067	51.383	479.6	41.7612	716.733	33.4075	1.15218
	-	NM_028726	112.567	3.61032	106.6	1.15326	132.1	1.74356	123.067	4.9411	1.15447
	Sec63	NM_153055	2023.8	69.3992	1701.37	36.253	2250.77	9.47705	1964.83	65.4172	1.15485
	Fam128b	NM_029354	877.767	56.1212	1003.2	11.6503	1188.43	25.3064	1159	2.57099	1.1553
	BC031781	NM_145943	2631.5	88.0081	3063.37	75.7635	3250.13	96.7226	3540	63.7036	1.15559
	Gnao1	NM_010308	317.867	9.65994	274.767	9.98337	384.5	4.88092	317.8	9.09634	1.15662
	Tmed9	NM_026211	16324.2	628.685	15507	328.92	20153.5	554.911	17951.5	487.633	1.15764
	Znrf1	NM_133206	249.533	14.0383	236.267	6.96882	306.733	2.4504	273.533	2.86725	1.15773
	-	NR_002875	41316.1	633.138	41711.4	731.226	46101.4	669.634	48340.6	1052.63	1.15893
	Reps1	NM_009048	2912.47	80.3443	2421.93	44.3838	2732	46.3138	2806.9	64.2497	1.15895
	Zyx	NM_011777	18944.8	1046.97	21463	424.356	26955.7	1446.89	24888.5	1064.61	1.1596
	Dgka	NM_016811	195.933	2.59829	158.067	9.19154	190.3	3.18172	183.433	2.69835	1.16048
	Gpr84	NM_030720	108.567	2.54318	100.8	0.750555	122.8	2.77909	117.067	3.43527	1.16138
	Acaa1a	NM_130864	4938.93	266.342	4361.63	209.706	6366.83	188.051	5066.57	250.773	1.16162
	1700029G01Rik	NM_025856	185.5	1.35769	174.067	1.22384	232.467	6.5763	202.333	7.25381	1.16239
	Daam2	NM_001008231	159.2	3.36452	153.467	4.05517	180.767	5.34052	178.467	4.56813	1.1629
	Nfatc2ip	NM_010900	252.3	0.896289	317.433	14.5783	257.467	7.03949	369.233	8.13927	1.16318
	Aktip	NM_010241	292.6	9.19366	286.367	7.97001	343.167	9.00469	333.133	4.12203	1.16331
	Alg5	NM_025442	1365.23	8.89763	1419.37	27.7881	1473.43	46.6667	1651.9	52.5529	1.16383
	Ilkap	NM_023343	1903.77	48.1094	1655.6	65.4316	2111.57	18.0015	1926.9	67.583	1.16387
	Alg5	NM_025442	1202.9	10.9028	1404.67	38.5228	1457.7	39.3065	1635.17	66.5327	1.1641
	-	NM_025847	862.033	40.1511	1140.1	13.2372	1172.5	24.0286	1327.33	24.0887	1.16422
	Zwilch	NM_026507	197.7	1.861	270.633	8.02586	205.5	4.40492	315.167	7.99715	1.16455
	Tctn2	NM_026486	359.3	9.82446	308.6	1.81475	420.4	10.3929	359.533	3.94729	1.16505
	1200002N14Rik	NM_027878	160.433	4.32294	178.967	3.40653	213.133	6.58846	208.567	12.3018	1.16539
	Txnl4b	NM_175646	496.3	18.4939	556.8	18.0359	573.1	28.9995	649.167	13.2484	1.16589
	Hmgcl	NM_008254	664.467	15.0415	586.5	9.2738	828.767	18.4393	684.167	32.0344	1.16653
	Cyhr1	NM_180962	932.667	40.4141	834.967	48.1334	1209.5	62.5415	974.6	41.6626	1.16723
	Nppa	NM_008725	113.233	3.55637	117.667	3.34979	147.633	6.1974	137.367	1.89062	1.16742
	Exog	NM_172456	413.867	13.2268	547.333	27.4246	478.333	7.94362	639	27.1216	1.16748
	Msi2	NM_054043	981.2	31.8412	835.867	11.5773	1159.37	18.5966	976.067	54.8725	1.16773
	-	XM_132514	1877.6	85.8979	2036.67	20.3393	2327.03	63.806	2378.93	34.2217	1.16805
	Taf13	NM_025444	1952.57	149.907	2333.17	94.9385	2734.1	33.8013	2726.23	104.284	1.16847
	Ak3	NM_021299	1457.13	42.1531	1172.77	60.043	1894.23	88.2768	1370.6	82.4626	1.16869
	Tpm1	NM_024427	32811.7	1016.93	35486.9	1053.47	39883.1	1156.79	41493.4	1025.37	1.16926
	Smn1	NM_011420	5492.67	267.187	5845.57	47.6612	6242.63	66.4409	6836.47	49.7667	1.16951
	Dtx3	NM_030714	1621.9	60.2135	1566	115.797	2172.67	102.031	1831.63	8.27875	1.16962
	1110028C15Rik	NM_177645	499.467	10.6568	584.967	20.5998	631.933	22.3212	684.333	30.849	1.16987
	Zfp639	NM_144519	2791.8	74.102	3394.8	141.353	3160.47	111.861	3975.53	215.871	1.17106
	-	XM_125771	593.333	35.9949	460.8	22.9875	760.3	49.3568	539.933	14.5671	1.17173
	H6pd	NM_173371	605.067	23.67	492.667	4.81191	680.9	33.7082	577.8	29.4444	1.1728
	C130022K22Rik	NM_172730	864.467	10.7617	1074.2	25.06	1120.67	6.5244	1260.07	61.648	1.17303
	Lgmn	NM_011175	3558.13	195.348	3025.83	162.164	4210.13	157.203	3549.6	99.5017	1.1731
	5133400G04Rik	NM_029485	352.133	18.2332	450.133	19.7937	385.3	18.5834	528.133	26.8164	1.17328
	Ciz1	NM_028412	2590	53.6426	2518.03	50.2001	3004.6	90.4816	2955.4	94.8228	1.1737
	Itm2b	NM_008410	15142.1	651.837	13404.1	162.751	17244.7	304.554	15735.5	571.484	1.17393
	Hn1	NM_008258	10539.1	446.206	16090.4	529.604	12994.2	469.968	18900.7	711.372	1.17466
	1110032A13Rik	NM_199197	1071	32.4827	924.833	37.6741	1243.5	32.4294	1086.73	47.8375	1.17506
	-	NM_001033193	580.9	34.6554	363.233	19.6829	624.467	19.6182	427.133	15.828	1.17592
	Gdi1	NM_010273	2241.33	94.1601	2039.27	66.1091	2674.27	71.7059	2399.33	54.9069	1.17656
	Col6a1	NM_009933	127.933	7.88381	126.5	5.58241	178.567	12.0458	148.867	1.50148	1.17681
	Sfxn4	NM_053198	254.767	13.4454	311.033	15.572	326.667	21.1176	366.4	5.96015	1.17801
	-	XM_196324	203.867	13.0596	199.3	5.95063	319.567	20.0308	234.9	1.5695	1.17863
	Chchd1	NM_025366	11788.3	159.795	13072.2	632.821	12664.4	475.411	15419.2	549.471	1.17954
	Amigo3	NM_177275	199.5	13.9271	200.9	8.74014	284.633	8.56978	237	8.60949	1.17969
	Ppic	NM_008908	12320.2	201.767	12993.6	444.028	15735	901.607	15329.7	330.598	1.17979
	Lamp1	NM_010684	8846.33	88.4131	7925.1	97.4551	10593.5	429.319	9359.37	345.699	1.18098
	Rai12	NM_018740	4785.63	160.118	5581.43	205.151	5638.4	232.318	6593.1	170.528	1.18126
	Fbn1	NM_007993	339.467	20.8415	356.3	19.8273	468.8	7.08872	420.933	2.57509	1.1814
	Scly	NM_016717	402.967	11.9714	403.767	4.34063	469.767	13.0693	477.033	11.9136	1.18146
	Pdzd11	NM_028303	681.9	65.6324	825.633	8.89369	822.667	23.6774	975.567	18.9288	1.1816
	Mapk8ip1	NM_011162	365.867	16.1082	351.233	20.6131	500.067	19.9708	415.1	26.5259	1.18184
	Alg2	NM_019998	323.967	5.31204	322.3	4.28291	429.7	11.3271	381	14.5452	1.18213
	Pppde2	NM_134095	1221.9	38.9405	1067.23	40.1147	1427	21.3226	1261.83	20.3103	1.18234
	Lzts2	NM_145503	2430.2	45.4588	2246.57	169.438	3127.63	119.222	2656.3	17.3785	1.18238
	Tfpt	NM_023524	831.4	27.789	753.367	33.5725	997.133	17.0531	890.833	31.3925	1.18247
	Plekhb2	NM_145516	1219.03	33.2947	887.633	50.0883	1211.7	48.9317	1050.13	35.1735	1.18307
	Wdr68	NM_027946	3708.53	254.352	4950.73	80.527	4845.7	239.877	5857.07	107.438	1.18307
	Hist2h3b	NM_178215	10349.2	424.624	12910	1015.84	11568.7	274.138	15277.6	598.572	1.18339
	Mrpl24	NM_026591	3224.4	45.7145	3616.47	123.527	3909.8	61.5164	4279.8	199.664	1.18342
	Rpl37	NM_026069	143.733	4.39482	121.167	1.00885	143.667	5.22951	143.4	2.06478	1.18349
	Bcl3	NM_033601	210.833	5.51855	225.033	5.97671	263.7	2.44199	266.5	11.6629	1.18427
	Shd	NM_009168	140.833	6.38496	133.867	7.59327	182.4	2.40069	158.633	6.87249	1.185
	Magi3	NM_133853	165.767	2.91681	162.633	4.60483	191.167	2.27327	192.833	8.18318	1.18569
	Srf	NM_020493	1777.4	84.8225	2303.23	58.6182	2623.23	193.53	2732.03	135.172	1.18617
	Mpnd	NM_026530	1435.4	8.65698	1399.83	38.9318	1889.67	67.865	1660.73	110.413	1.18638
	-	XM_131633	104.733	6.30617	104.833	2.20404	131.1	0.665833	124.433	3.88344	1.18696
	Selk	NM_019979	1941.1	177.596	2152.67	115.432	2770.07	80.3113	2555.2	74.9182	1.18699
	Tbc1d20	NM_024196	2171.53	89.0375	1712.37	91.0405	2689.43	77.6781	2034.77	30.1822	1.18828
	Tpi1	NM_009415	19160.2	198.567	17710.9	549.555	21095.5	634.249	21051.8	175.791	1.18864
	Alg5	NM_025442	3428	93.1079	3466.87	50.4796	4042.17	23.8521	4121	29.5579	1.18868
	Smarcd2	NM_031878	2069.17	72.3372	1721.57	70.4417	2429.4	71.9438	2046.5	64.7929	1.18874
	Rap2c	NM_172413	2117.33	67.6432	1874.33	67.1709	2439.63	65.4737	2229.17	40.1682	1.18932
	Eid3	NM_025499	119.567	0.874325	99.1333	3.23024	118.1	2.41316	117.933	1.68358	1.18964
	-	XM_132528	766.233	42.0917	529.2	31.4734	703.3	29.4861	629.633	13.2667	1.18978
	Lamp2	NM_001017959	1965.63	28.2316	1836.87	63.4277	2473.1	138.356	2185.8	19.1103	1.18996
	Gmds	NM_146041	842.333	24.0949	1018.23	32.626	1235.3	80.7244	1212.77	32.6209	1.19106
	Lyplal1	NM_146106	627.167	13.1191	740.567	14.4827	860.267	18.3538	882.1	8.64079	1.19111
	Cenpp	NM_025495	458.367	43.0328	789.9	5.04777	433.733	16.1318	941.067	10.4309	1.19137
	1700112C13Rik	NM_183103	100.4	4.22256	105.533	0.145297	126.767	4.43672	125.733	3.73735	1.19141
	Fxc1	NM_019502	646.633	22.5829	764.3	33.9618	848	2.91433	910.9	50.065	1.19181
	Puf60	NM_028364	7789.2	300.747	8829.17	383.85	10082.3	326.774	10523.2	455.224	1.19187
	Golga5	NM_013747	716	12.3427	729	28.4556	869.567	12.2262	869.067	28.2669	1.19214
	Ilk	NM_010562	744.933	62.2021	882.333	21.6353	971.5	32.1727	1052.67	28.3221	1.19305
	Copa	NM_009938	3038.33	61.7706	2523.47	38.3126	3569.47	106.902	3010.9	35.1125	1.19316
	Zfp184	NM_183014	348	7.70779	300.7	11.2641	359.7	6.97209	359	9.04562	1.19388
	Ly6g6c	NM_023463	113.4	5.62168	109.7	3.92726	139.6	3.96274	131.033	3.27635	1.19447
	Zscan21	NM_011757	249.833	8.94992	283.633	6.08011	325.467	5.65401	338.867	22.9501	1.19474
	Ddit4l	NM_030143	136.333	5.91533	141.4	5.51755	205.6	2.11975	169	6.67757	1.19519
	Shisa4	NM_175259	262.133	15.4825	242.2	3.92471	351.333	17.0389	289.5	2.75015	1.19529
	Mus81	NM_027877	374.467	10.2564	538.533	16.3555	517.667	34.6291	644.6	39.5496	1.19696
	Stk11	NM_011492	1110.87	8.92979	1154.57	19.8713	1263.13	60.2131	1382.33	20.896	1.19727
	Rgs12	NM_173402	314.2	15.5058	315.2	9.86053	369.1	9.564	377.433	6.53843	1.19744
	Zfp367	NM_175494	728.567	21.9211	405.233	29.6669	713.1	58.561	485.367	37.4181	1.19775
	Vcan	NM_001081249	158.333	5.48341	152.267	4.51085	193.033	8.12288	182.533	3.7618	1.19877
	Ndufa7	NM_023202	8802.93	214.239	9550.03	548.259	11450.8	413.892	11448.8	128.066	1.19882
	Kctd5	NM_027008	3837.87	116.666	3378.6	150.309	4478	11.5518	4053.47	180.228	1.19975
	Ap3m2	NM_029505	194.267	11.6871	213.833	10.116	262.033	8.52786	256.633	10.8573	1.20016
	Tuba3a	NM_009446	356.3	33.6866	659.433	7.67362	441.567	37.7093	791.667	82.0428	1.20053
	Midn	NM_021565	4612.1	76.3351	4605.67	43.9038	5641.87	114.347	5532.77	45.3412	1.2013
	Syap1	NM_025932	712.867	5.02472	613.2	22.1545	758.8	15.9412	736.833	26.3243	1.20162
	Mcm2	NM_008564	3708.6	14.9564	2001.73	86.0983	3274.23	48.3795	2405.9	10.2328	1.20191
	Cbfb	NM_022309	6705.7	319.237	5867.87	41.9528	7518.8	226.5	7056.5	122.961	1.20257
	Pgm5	NM_175013	127.033	2.0955	116.333	3.43624	158.767	5.1686	139.9	8.92543	1.20258
	Rai12	NM_018740	1925.57	85.3467	2278.87	77.2706	2298.4	53.8034	2741.67	145.302	1.20308
	Tpi1	NM_009415	14971	468.037	13954.8	112.357	17321.2	353.385	16793.3	467.852	1.20341
	A2bp1	NM_021477	113.467	4.06708	116.5	2.69072	147.133	2.61683	140.233	4.66702	1.20372
	4930519N13Rik	NM_207204	439.7	28.5606	365.433	29.4241	569.9	28.8168	440.067	2.30675	1.20423
	Evl	NM_007965	1541.13	77.5677	1469.43	33.8642	1960.57	30.0278	1770.43	63.2837	1.20484
	Ung	NM_011677	1148.5	77.2534	246.6	12.0035	937.767	36.0582	297.2	18.7232	1.20519
	Tollip	NM_023764	2137.97	90.2128	1992.5	52.2651	2408.47	34.0809	2403.5	73.5715	1.20627
	Myl6	NM_010860	21440.5	698.69	22486.6	1141.27	26479.8	72.4333	27135.8	637.219	1.20675
	Gdf5	NM_008109	113.767	2.59829	112.633	1.68951	128.367	1.0729	135.933	2.65477	1.20687
	4833439L19Rik	NM_133797	595.7	21.7086	542.933	6.1249	702.433	25.4625	655.267	22.0009	1.2069
	Zscan21	NM_001044705	394.4	2.50267	451.233	11.3702	539.8	19.7617	544.667	18.2	1.20706
	Narf	NM_026272	190.967	1.54524	183.2	4.94874	228.267	4.32255	221.2	11.9776	1.20742
	Rnf34	NM_030564	1352.73	48.9686	1514.83	46.0023	1626.13	37.119	1830.23	32.7988	1.20821
	Morf4l2	NM_019768	10853	199.152	11300.7	265.9	14053.9	619.047	13653.7	757.372	1.20822
	Akr1a4	NM_021473	7058.4	277.629	6619.53	184.84	8538.93	126.376	8007.93	355.933	1.20974
	Bcl9l	NM_030256	1521.57	102.6	1374.97	9.67218	2080.7	66.765	1663.47	98.6439	1.20982
	Pld3	NM_011116	1035.07	84.4962	862.067	13.9798	1276.13	44.456	1043.4	34.4022	1.21035
	Agpat6	NM_018743	5043.8	104.755	4737.1	52.4609	6412.77	139.051	5733.67	217.877	1.21038
	Bicc1	NM_031397	142.7	9.24554	136.667	6.93357	193.4	10.9715	165.467	3.38641	1.21073
	Cd248	NM_054042	788.467	69.1111	636.467	75.2827	1327.67	134.36	771.067	59.1482	1.21148
	Kctd6	NM_027782	300.867	8.30348	294.833	6.2834	319.867	7.89458	357.5	13.0415	1.21255
	Magmas	NM_025571	1076.63	21.4263	1158.27	48.4957	1275.77	23.8278	1404.47	58.2313	1.21256
	Pld3	NM_011116	479.8	18.564	425.3	19.5255	656.133	36.7866	515.767	43.8294	1.21271
	Tesk1	NM_011571	789.2	20.7331	654.067	49.1157	1000.8	29.3722	793.933	31.7244	1.21384
	Elf2	NM_023502	530.8	20.2724	435.367	22.434	581.7	18.7513	528.467	13.7165	1.21384
	Syap1	NM_025932	1555.4	101.407	1462.23	46.8814	1917.27	37.8076	1776.03	65.7834	1.2146
	Zfp36l1	NM_007564	179.367	5.49252	197.533	2.07391	224.267	2.78109	240.067	7.59481	1.21533
	Ssr2	NM_025448	9263.93	487.28	10007	413.143	11872.3	418.363	12168.8	218.682	1.21603
	Ets1	NM_001038642	2311.8	95.4267	2377	91.9453	2729.23	35.8955	2891.87	81.7304	1.2166
	Hist1h1c	NM_015786	6527.6	446.344	8520.77	700.058	8371.87	411.726	10372.2	206.44	1.21728
	Ccpg1	NM_028181	709.7	37.5075	670.267	17.3849	972.433	41.0211	816.2	48.5818	1.21772
	Dph2	NM_026344	720.667	5.9962	870	39.414	819.833	39.1436	1060.03	56.9027	1.21843
	Dctn4	NM_026302	539.667	27.6783	456.367	6.86934	679.467	8.96741	556.1	25.329	1.21854
	Cbx1	NM_007622	212.667	6.14121	200.267	3.2323	226.3	8.10699	244.033	5.15148	1.21854
	P4hb	NM_011032	10432.3	544.27	8369.6	493.31	12157.9	294.053	10202.8	246.519	1.21903
	Podnl1	NM_001013384	125.6	2.62298	126.733	7.22619	162.9	7.2037	154.6	4.21426	1.21989
	Zfp101	NM_009542	260.7	14.3431	361.133	2.80614	270.533	20.1615	440.567	12.0401	1.21996
	Yif1a	NM_026553	1401.97	34.1341	1459.83	69.188	1742.2	39.6893	1781.27	49.6916	1.22019
	Nras	NM_010937	6608.03	337.249	7433.07	334.012	8493	260.837	9070.17	86.6805	1.22025
	Hmgcl	NM_008254	1426.17	60.6743	1248.3	19.7122	1939.4	92.7825	1523.37	56.6201	1.22036
	Diras2	NM_001024474	119.633	0.726483	111.533	3.86106	148.4	2.8006	136.267	3.98595	1.22176
	-	XM_126427	343.733	12.8546	278.867	10.4716	366.3	16.3441	341.1	6.7656	1.22316
	Tssc4	NM_138631	599.6	17.8259	493.567	14.0919	631.9	24.3666	603.9	15.52	1.22354
	Gmfg	NM_022024	154.4	4.75219	158.7	2.17332	178.367	2.95879	194.2	4.82735	1.22369
	Gsk3b	NM_019827	592.1	15.2018	542.333	13.2167	729.033	28.7521	664.033	20.6133	1.2244
	Mfap5	NM_015776	104.6	3.93107	114.4	3.96274	137.533	8.49163	140.167	3.5788	1.22524
	Tmsb10	NM_025284	22613.1	1480.24	24493.2	752.597	32388.9	213.146	30019.3	1202.4	1.22562
	Dnalc1	NM_028821	203.067	3.37458	183.4	5.77264	239.533	1.79382	224.867	4.38571	1.2261
	Zfp566	NM_152814	321.6	9.22894	330.767	17.3327	328.133	6.29824	405.6	10.3621	1.22624
	Sobp	NM_175407	276.1	6.59621	276.533	11.0135	415.7	11.5326	339.1	11.5052	1.22626
	Hist1h4h	NM_153173	332.1	7.18633	320.867	13.1638	506.033	11.0584	393.5	15.1071	1.22636
	Grb14	NM_016719	127.733	4.4431	133.467	3.84419	171.867	0.560753	163.7	5.31131	1.22652
	Bgn	NM_007542	5219.67	113.767	5305.83	198.293	7176.93	46.7821	6508.63	422.365	1.22669
	2610024G14Rik	NM_019836	1703.5	60.3931	1509.7	55.2527	1916.57	30.6431	1852.67	52.0276	1.22718
	Ssbp2	NM_024186	535.433	25.4077	651.5	34.1749	708.133	8.51202	800.033	20.9336	1.22799
	H13	NM_010376	1565.5	47.3589	1457.47	43.155	1932.3	88.6508	1790.07	29.4418	1.2282
	-	NM_026881	3099.3	119.302	3074.3	60.38	3582.33	61.4983	3776.53	153.114	1.22842
	BC003266	NM_030252	712.1	30.7591	794.1	26.1286	859.7	16.6857	975.533	43.6799	1.22848
	Arl2	NM_019722	816.667	36.1126	907.333	8.76743	935.733	28.8003	1114.97	5.35859	1.22884
	Fbxo25	NM_025785	930.967	55.612	868.1	42.2756	1212.27	7.40188	1067.07	27.0003	1.2292
	Tmem55a	NM_028264	3108.7	127.955	2988.53	99.9727	3636.5	96.9273	3673.87	90.9917	1.22932
	Pif1	NM_172453	305.633	12.5186	1481.5	105.92	336.4	21.9887	1821.83	123.851	1.22972
	St6gal1	NM_145933	1530	32.3716	1792.97	17.8766	1966.73	101.895	2206	65.4385	1.23036
	Zc3hc1	NM_172735	4754.13	83.4667	5067.07	219.331	5729.23	158.293	6235.73	149.332	1.23064
	Ndel1	NM_023668	2112.57	21.1599	1831.1	56.3193	2506	64.9341	2253.53	12.6426	1.2307
	Psmg3	NM_025604	691.633	16.0504	761.467	23.5985	770.267	36.2591	937.4	11.9716	1.23104
	Kcnh2	NM_013569	216.867	16.8334	193.7	7.0812	310.4	19.2505	238.5	16.4214	1.23129
	Mrps31	NM_020560	666.467	41.4319	753.2	41.9334	755.167	7.43445	927.467	34.0093	1.23137
	Fam40a	NM_153563	4714.97	73.0161	5156.8	217.388	6122.97	300.368	6349.93	182.291	1.23137
	Hic1	NM_010430	117.3	4.87579	115.033	3.85242	168.6	6.15873	141.7	10.2137	1.23182
	Fgd6	NM_053072	717.3	19.3086	523.1	40.2637	763.9	9.75209	644.6	22.5586	1.23227
	Tmem2	NM_031997	1319.67	158.491	1028.57	71.968	1753.53	36.4903	1267.63	39.9962	1.23242
	Pou6f1	NM_010127	156.7	10.2015	144.467	5.84076	257.267	11.2974	178.2	19.2204	1.2335
	Yipf3	NM_145353	1718.53	53.2672	1648.97	78.7837	2145	33.5286	2035.5	65.1044	1.23441
	Nedd8	NM_008683	5607.97	182.742	5816.8	190.302	6517.2	306.673	7184.23	215.729	1.23508
	Stx5a	NM_019829	432.767	13.4405	473.733	30.0412	587.367	18.1613	585.267	12.5827	1.23544
	Mfap2	NM_008546	164.233	6.91408	176.7	9.71202	298.867	25.8162	218.367	16.2974	1.23581
	Rgs10	NM_026418	820.967	64.3525	622.4	66.7721	1172.67	43.6836	769.2	35.0651	1.23586
	Mdk	NM_001012336	16988.6	368.156	17537	492.329	22693.3	319.23	21674.5	1083.5	1.23593
	Zhx1	NM_009572	145.6	3.48282	153.4	8.39305	216.167	1.76383	189.6	2.38607	1.23598
	Wdr6	NM_031392	2993.13	194.978	2712.1	210.193	3962.7	145.999	3353.77	124.44	1.2366
	Chaf1b	NM_028083	1971.1	16.1853	876.433	36.0616	1930.53	107.638	1084.03	76.2804	1.23687
	-	NM_175404	338.1	8.32006	315.4	10.2246	387.433	9.87258	390.367	2.06908	1.23769
	Matn1	NM_010769	134.2	4.92172	133.867	6.63861	160.6	3.40783	165.7	5.8731	1.2378
	Nrip3	NM_020610	121.667	0.783865	116.867	2.86376	133.767	6.04768	144.833	4.30749	1.2393
	Faf1	NM_007983	205.967	3.18451	206.433	4.75722	243.567	2.71805	255.833	3.48154	1.2393
	Dlgap4	NM_001042487	746.1	21.634	783.033	10.2216	1020.87	68.4814	971.3	42.6155	1.24043
	Kctd10	NM_026145	3153.7	103.115	2543.87	136.718	3450.23	94.7666	3156.4	129.202	1.24079
	Abat	NM_172961	310.033	20.872	327.467	18.7135	475.933	33.9026	406.4	14.1302	1.24104
	Cbfb	NM_022309	7024.1	397.761	6175.93	223.214	8118.7	159.456	7664.83	90.9066	1.24108
	Tmem2	NM_031997	3793.53	412.668	2636.7	125.679	4512.47	206.349	3273.63	119.422	1.24156
	Tuba1a	NM_011653	16740.4	643.803	23776.7	441.765	18708.8	807.515	29538.8	138.933	1.24234
	Casp12	NM_009808	143.567	5.92659	137.033	0.788106	175.233	0.731057	170.267	2.21836	1.24253
	5430437P03Rik	NM_026636	1853	56.3847	1811.13	105.929	2052.73	1.97428	2250.77	36.6564	1.24274
	Dci	NM_010023	2013.17	53.6647	1926.37	100.808	2450.67	83.5842	2394.5	65.5976	1.24301
	Tax1bp3	NM_029564	6305.23	458.442	6439.4	118.341	8021.97	134.053	8007.93	317.763	1.24358
	Cnpy4	NM_178612	392.933	9.47142	430.5	1.75784	498.467	13.7921	535.433	16.8316	1.24375
	Osbpl2	NM_144500	871.667	65.3385	763.233	15.7751	1162.97	42.9314	950.267	12.2358	1.24505
	Trappc2	NM_025432	390.967	7.42099	422.933	9.537	475.967	16.7551	526.667	25.5255	1.24527
	Scube3	NM_001004366	167.367	2.31036	159.067	10.4977	223.567	14.4731	198.1	6.59571	1.24539
	Cep55	NM_028760	533.7	26.5801	1658.73	165.815	616.7	40.7083	2068.27	140.867	1.2469
	St7l	NM_153091	671.5	27.3922	850.833	90.1005	858.967	14.2522	1061.13	17.3265	1.24717
[truncated: 800 more rows]

## Sheet: Table S1(sorted for 2N genes)
	Spreadsheet S1. Genome-wide expression analysis using cell cycle specific sorted cells (2N vs 4N) with or without Pax3:Foxo1a knockdown. This list is sorted by for 2N differential expression of genes. Genes in Figure 4C are in blue.
			Control (Pax3:Foxo1a allowed on)				knock down of Pax3:Foxo1a				ratio 2N knockdown: 2N control
			2N		4N		2N		4N
	Gene ID	Gene Identifier	mean	SEM	mean	SEM	mean	SEM	mean	SEM
	Car3	NM_007606	376	48.7689	391.567	35.2625	3877.1	487.292	4241.07	418.169	0.0969797
	Ogn	NM_008760	194.3	8.47014	177.667	1.8169	1534.1	108.649	881.233	50.0345	0.126654
	Acta1	NM_009606	933.4	144.427	1075.23	140.716	5622.5	853.477	6761.17	351.889	0.166012
	Igfbp2	NM_008342	605.2	61.6049	723.033	124.954	3435.4	282.054	4274.07	174.563	0.176166
	Actg2	NM_009610	1707.93	223.663	2121.37	337.482	9614.8	1209.44	10663.9	811.004	0.177636
	Cxcl12	NM_013655	549.467	36.7891	471.033	22.6628	3030.47	62.9703	2820.23	291.253	0.181314
	Inhba	NM_007554	219.7	23.343	221.933	15.1338	1200.47	42.7545	1296.3	58.1488	0.183012
	Igfbp2	NM_008342	366.833	62.0333	391.9	50.1091	1983.3	322.242	2424.5	62.5807	0.184961
	Itga11	NM_176922	211.733	30.4097	223.733	33.3173	1057.47	219.285	1277.17	194.555	0.200226
	Acta2	NM_007392	5143.5	953.042	6585.83	1535.89	25317.4	3144.41	28242.5	1086.38	0.203161
	Tgfbi	NM_009369	305.033	22.4682	300.533	14.2626	1467.3	185.432	1010.03	140.809	0.207887
	Adamts4	NM_172845	389.067	54.8268	368.4	46.3155	1858.1	334.162	1951.23	204.588	0.20939
	Acta2	NM_007392	4419.63	1035.95	5007.93	976.635	19687.7	3006.19	23056.7	2062.57	0.224487
	Acta2	NM_007392	5542.63	594.097	6457.27	698.555	23655.4	1686	25820.6	1656.76	0.234307
	Hspa1a	NM_010479	177.833	6.0938	176.3	7.03776	714.633	66.0312	697.067	94.0709	0.248845
	D0H4S114	NM_053078	484.867	45.9218	490.067	65.6181	1932.7	237.524	1669.23	278.244	0.250875
	Lox	NM_010728	170.467	9.83638	170.7	5.51392	660.867	92.9185	681.667	56.6234	0.257944
	Olfml3	NM_133859	464.233	18.0734	462.1	14.1656	1788.93	48.9038	1597.07	173.821	0.259503
	Actc1	NM_009608	831	160.562	1192.6	179.695	3143.73	372.464	3707.17	183.7	0.264336
	Tagln	NM_011526	290.5	29.0331	349.167	25.1929	1084.8	141.647	1140.73	55.6112	0.267791
	Actc1	NM_009608	315.867	64.3882	473.733	95.6711	1154.47	208.417	1316.67	113.801	0.273603
	Pdlim3	NM_016798	821.133	142.268	1041.97	145.365	2844.9	392.049	3269.33	262.867	0.288633
	Inhba	NM_008380	530.733	92.7693	382.4	56.7585	1818.1	210.762	1703.7	213.772	0.291916
	Ptx3	NM_008987	383.9	59.4194	474.433	108.02	1233.03	224.964	1429.8	184.193	0.311347
	Ptx3	NM_008987	420.833	86.3416	487.8	116.521	1337.23	229.173	1606.8	197.966	0.314705
	Fas	NM_007987	180.6	15.837	180.533	16.9113	569.433	70.6999	556.567	52.9927	0.317158
	Cxcl12	NM_021704	214.367	16.9125	182.633	4.6563	672.667	78.0386	534.933	56.7532	0.318682
	Akap12	NM_031185	683.433	115.484	587.5	63.4859	2133.83	265.101	1972.4	81.2354	0.320285
	St5	NM_029811	1512.77	147.067	1687.87	72.5391	4696.17	58.3682	4541.23	248.335	0.322128
	Pdlim3	NM_016798	250.867	37.595	313.4	22.2083	772.2	120.201	928.867	92.5625	0.324873
	Ogn	NM_008760	113.533	2.56926	105.533	7.20702	348.333	71.2794	240.967	19.5204	0.325932
	Ifi27l1	NM_026790	2169.8	48.8771	2128.77	68.3802	6624.33	162.457	6324.53	171.082	0.32755
	Olfml2b	NM_177068	1570.23	179.037	1597.13	148.871	4667	590.893	4891.4	432.601	0.336454
	Dkk3	NM_015814	218.833	13.4721	236	23.4558	646.2	78.4959	514.967	70.6323	0.338646
	1110032E23Rik	NM_133187	168.8	16.4344	226.467	22.7134	495.733	56.3189	796.867	69.8823	0.340506
	St5	NM_029811	2085.87	151.395	2075.2	71.489	6093.37	214.899	5614.67	369.065	0.342318
	Pdlim4	NM_019417	415.3	29.5014	479.133	52.6376	1205.13	182.842	1449.03	272.82	0.34461
	-	XM_196007	1718.67	128.296	1590.9	11.9887	4983.17	160.981	5770.5	163.892	0.344895
	Cxcl12	NM_001012477	193.633	19.8818	188.7	12.5703	557.6	16.2316	451.2	28.6657	0.347261
	Ifi27l1	NM_194069	2600.63	62.3505	2495.27	129.22	7477.93	187.832	6917.2	204.495	0.347774
	Prnd	NM_023043	184.033	7.73527	236.167	27.5177	524.567	79.9584	766.833	108.308	0.350828
	Nnat	NM_010923	260.7	28.2631	252.2	8.57049	738.6	44.3098	846.267	32.5732	0.352965
	Tnnc1	NM_009393	251.033	7.72579	237.3	9.01628	710.333	91.9203	663.267	18.8242	0.353402
	Cdkn1c	NM_009876	1149.9	17.65	1287.23	118.241	3242.57	281.909	3175.63	210.514	0.354626
	Ccl7	NM_013654	128.9	7.48398	134.3	6.26605	356.967	31.8123	447.633	41.7755	0.361098
	Myl4	NM_010858	196.567	14.7375	192.033	4.26002	541	69.9917	403.467	55.8607	0.36334
	-	NM_146058	533.967	82.2996	613.433	105.426	1467.2	264.59	1812.33	270.694	0.363936
	Runx1t1	NM_009822	156.467	9.91805	157.933	14.6051	429.533	15.1026	389.433	23.4625	0.364272
	Fstl1	NM_008047	1194.7	138.642	1151.67	123.024	3267.73	411.555	3044.1	162.918	0.365605
	Cyp1b1	NM_009994	1396.8	233.456	1559.47	186.909	3791.17	183.205	3720.83	231.308	0.368435
	Adamts5	NM_011782	705.467	97.1296	543.267	91.9267	1894.6	228.92	1778.6	29.2966	0.372357
	Bdh2	NM_027208	708.633	38.3673	590.667	10.2346	1897.37	135.971	1394.43	16.7326	0.373482
	Gulp1	NM_028450	117.833	5.54417	123.133	2.11056	313.9	43.6423	266.633	18.4547	0.375384
	Col8a2	NM_199473	155.333	3.86192	158.767	5.94904	413.067	62.2903	379.2	16.3741	0.376048
	Dkk3	NM_015814	219.933	5.12326	221.1	18.1055	583.667	76.1983	449.367	68.0186	0.376812
	Rerg	NM_181988	221	20.7162	221.633	17.6415	586.067	82.4395	471.533	53.6423	0.37709
	Sdc2	NM_008304	1414.33	83.9034	1153.53	66.4093	3727.8	307.308	3131.6	137.831	0.379401
	Col5a1	NM_015734	3869.33	807.96	3422.9	352.359	10131.7	779.307	8001.93	780.283	0.381903
	Wisp1	NM_018865	2259.73	407.176	2835.67	334.893	5767.03	509.997	7088.5	480.266	0.391836
	Ccdc80	NM_026439	1107.73	139.698	977.5	111.194	2801.77	210.487	2909.37	167.501	0.395368
	Trp53inp1	NM_021897	184.567	0.533333	176.267	6.49111	465.033	44.38	371.667	19.283	0.39689
	Artn	NM_009711	361.767	39.3914	452.367	32.2853	910.833	67.232	1103.3	69.2636	0.397183
	Tnnt3	NM_011620	226.533	17.386	239.733	13.7045	568.767	70.2362	623.5	62.0195	0.398288
	Cd59a	NM_007652	2092.27	28.5243	1578.53	24.6852	5251.33	106.095	5028.83	291.699	0.398427
	Nuak1	NM_001004363	249.7	4.92172	254.9	16.709	625	33.9797	748.7	31.5035	0.39952
	Krt14	NM_016958	341.667	25.8171	346.6	51.9836	853.1	87.8649	1011.27	77.3599	0.400501
	Artn	NM_009711	252.3	13.7158	317.6	10.641	627.633	60.7746	780.367	57.779	0.401987
	Stard13	NM_146258	291.967	27.7158	347.467	8.71863	725.2	58.7192	755.867	19.3977	0.402602
	Usp18	NM_011909	164.067	3.4031	170.467	10.0002	405.633	28.5301	542.7	21.4398	0.404472
	Gbp2	NM_010260	195.533	9.66805	185.067	4.77993	478.233	23.7246	597.933	32.2203	0.408866
	Irf1	NM_008390	1474.87	93.2033	1581.6	162.295	3597.8	46.1598	4079.67	149.698	0.409937
	Trp53inp1	NM_021897	224.233	8.88769	172.3	2.46847	542.433	29.7262	434.3	21.1311	0.413384
	-	NM_010156	649.367	26.0354	577.9	20.7693	1570.63	99.3082	1509.5	72.0538	0.413444
	Vdr	NM_009504	142.233	4.22466	152.133	5.22058	343.867	32.4412	275	11.6065	0.413628
	Fas	NM_007987	143.9	6.39296	157.067	4.55131	341.5	43.3419	349.5	37.4468	0.421376
	Loxl2	NM_033325	379.667	42.5876	367.733	30.8911	897.233	94.1564	862.533	83.0513	0.423153
	Eno3	NM_007933	1593.87	26.5346	1412.33	41.025	3759.33	200.752	3873.57	112.708	0.423977
	-	NM_146058	345.2	50.6137	358.767	44.2229	806.167	106.814	1080.53	171.344	0.428199
	Cd200	NM_010818	135.1	4.68081	148.067	8.89688	314.933	38.5167	352.167	30.2991	0.42898
	Limk2	NM_010718	572.967	46.7101	521.5	34.7825	1334.67	74.1061	1201.23	44.9804	0.429295
	-	XM_127523	191.1	10.3184	167.867	4.29974	435.4	63.7896	403.967	35.0524	0.438907
	Fzd2	NM_020510	244.767	15.6542	354.467	17.4702	555.733	40.8226	726.933	20.3883	0.44044
	Loxl1	NM_010729	496.267	44.849	538.9	25.0668	1123.5	68.4161	991.7	50.0663	0.441715
	Cd93	NM_010740	143.667	9.43263	138.6	2.0502	323.367	47.8156	314.633	35.4139	0.444285
	Spsb1	NM_029035	324.833	16.6746	319.467	17.7349	727.567	82.0658	683.967	34.5478	0.446465
	Fkbp7	NM_010222	894.1	71.1905	872.067	43.1575	1994.17	223.541	1753.17	91.0773	0.448357
	Slc40a1	NM_016917	231.4	29.6925	184.1	15.0028	514.167	36.3374	469.733	10.6905	0.450048
	Irak2	NM_172161	777.433	62.474	827.233	67.8367	1722.13	117.395	1812.67	101.442	0.451437
	Gdnf	NM_010275	289.5	44.6511	288.133	45.7992	639.9	98.2797	734.067	44.9151	0.452414
	Capn6	NM_007603	275.067	35.4777	251.833	24.6065	603.867	67.262	391.967	13.6512	0.455509
	Tceal8	NM_025703	2086.73	49.3747	2419.47	85.6748	4563.03	252.512	5313.77	166.513	0.457312
	Irf1	NM_008390	512.467	29.6047	506.1	10.8896	1117.63	57.1844	1281.1	25.5316	0.45853
	Vdr	NM_009504	138.7	7.82389	138.767	5.67049	302.333	22.4336	276.8	11.0024	0.458766
	Snai1	NM_011427	895.6	146.059	907.667	101.194	1942	142.549	2006.33	196.109	0.461174
	Cav1	NM_007616	4121.17	538.098	4755.4	803.216	8890.37	1044.05	10278.6	745.077	0.463554
	Oasl2	NM_011854	161.133	2.89041	212.467	15.3095	346.833	10.497	472.567	5.22951	0.464584
	Thbs1	NM_011580	916.033	121.931	832.5	118.677	1969.63	126.816	2225.53	195.269	0.465079
	Ogn	NM_008760	121.733	0.775314	116.1	4.2	261.7	9.88956	213.167	8.83484	0.465162
	Cd59b	NM_181858	451.033	29.0264	385.533	9.08503	968.8	85.0559	881.233	69.6475	0.465558
	Ube1l	NM_023738	154.5	14.0194	137.5	7.59013	331.467	12.9544	265.967	23.6694	0.46611
	Col3a1	NM_009930	1831.53	171.664	2111.33	335.427	3898.8	416.613	3857.63	355.071	0.469768
	Tgfbi	NM_009369	138.6	14.8042	136.633	3.28448	293.8	16.5186	249.733	22.5569	0.471749
	Htra1	NM_019564	2024	374.353	2039.73	103.3	4288	450.076	4662.1	186.062	0.472015
	Gadd45b	NM_008655	884.033	86.227	869.933	53.8179	1868.1	118.819	1705.27	67.2332	0.473226
	-	NM_183274	24659.9	4247.49	26352.2	3433.63	51972.2	1015.12	51946.4	2431.76	0.474483
	Pdgfc	NM_019971	1065.37	41.0855	1018.73	32.6325	2226.43	271.041	2560.23	60.3756	0.47851
	Enpp5	NM_032003	453	4.74658	358.067	11.5759	946.433	40.3237	810	21.8488	0.478639
	Zfp521	NM_145492	509.533	74.7371	576.167	69.0292	1064.07	138.742	1129.4	92.9467	0.478853
	Nfatc4	NM_023699	226.7	19.3714	263.3	17.5872	467.567	30.2207	438.467	34.5594	0.48485
	Kcnk1	NM_008430	747.4	71.6605	605.733	46.7334	1540.07	120.965	1240.37	87.4207	0.485303
	Lhfpl2	NM_172589	438.967	16.1122	423.367	21.2156	903.8	44.9037	786.967	24.6975	0.48569
	Ubtd2	NM_173784	355.033	10.6692	385.633	46.944	730.5	46.3209	699.9	75.2008	0.486014
	Thbd	NM_009378	128.333	4.05353	130.533	1.06823	262.9	30.8538	280.033	14.4446	0.488144
	Sbk1	NM_145587	621.867	36.2753	480.3	27.8202	1273.37	87.4895	932.8	102.552	0.488363
	Cd1d1	NM_007639	174.333	11.4674	158.733	8.03416	355.7	24.3644	299.5	9.55737	0.490112
	Cdk5r1	NM_009871	1025.23	79.0585	852.7	48.0884	2089.57	105.653	1805.1	53.3106	0.490642
	Lipa	NM_021460	542.067	31.5952	547.133	24.5754	1104.6	100.326	933.367	32.0852	0.490736
	Htra1	NM_019564	2433.63	273.745	2429.13	191.618	4958.2	528.46	5361.2	277.222	0.490829
	Rasgrp3	NM_207246	151.167	15.392	140.667	12.0211	307.633	27.3006	364.467	43.4984	0.491387
	Col6a1	NM_009933	1747.97	108.766	1683.43	99.4911	3539.9	15.7214	2319.83	81.8365	0.493791
	Sema5a	NM_009154	533.367	42.0958	681.467	91.486	1074.8	82.3741	886.933	78.8816	0.496248
	Tap2	NM_011530	416.733	29.2567	355.533	24.0654	839.467	43.6534	764.633	43.4979	0.496426
	Col6a2	NM_146007	211.433	17.5387	216.1	19.4171	423.767	29.3576	280.7	6.55464	0.498937
	Irak2	NM_172161	728.733	56.2116	737.7	46.3211	1458.87	97.465	1621.3	154.499	0.499519
	Efnb2	NM_010111	451	42.3193	371.3	46.05	901.4	110.134	802.667	71.9792	0.500333
	Ddit4	NM_029083	997.3	7.15262	1168.1	66.5509	1986.47	228.309	2414.63	122.423	0.502046
	Kif3c	NM_008445	484.067	19.5227	444.8	11.8697	963.6	44.9389	813.267	59.6647	0.502353
	Igsf9	NM_033608	407.5	92.1908	394.533	55.3621	809.533	69.186	830.733	46.9023	0.503377
	Asb4	NM_023048	221.733	29.1142	257.667	19.5271	440.167	26.0454	504.867	45.2582	0.503747
	Dag1	NM_010017	2790.27	218.779	2508.33	176.579	5518.57	96.5429	4614.03	226.32	0.505615
	Slc24a3	NM_053195	1288.77	100.059	1414.63	29.3772	2542.8	144.905	2720.03	65.1428	0.506831
	Krt7	NM_033073	468.567	27.317	570.9	11.7936	918.6	4.2194	1344.03	17.5667	0.510088
	Rab3il1	NM_144538	171.4	3.26241	170.133	9.54993	335.9	39.3853	318.467	24.5534	0.510271
	Rsad2	NM_021384	152.3	2.88675	177.3	5.12933	297.433	15.572	534.367	31.7871	0.512048
	Tgfb3	NM_009368	743.7	105.599	718.533	75.8123	1443.7	97.1352	1452.07	41.4462	0.515135
	Lmcd1	NM_144799	519.533	24.3673	669.7	60.7133	1007.73	75.2887	1181.93	101.11	0.515548
	Col6a1	NM_009933	1770.47	122.121	1675.13	163.657	3426.33	85.0095	2131.6	70.0372	0.516725
	Pdgfrb	NM_008809	154.467	5.93305	150.4	14.0433	298.733	21.9758	235.167	15.7582	0.517074
	Csrp1	NM_007791	5331.57	355.05	6017.17	573.985	10307.7	228.97	11747.3	929.16	0.517241
	Ssbp3	NM_198438	1885.43	107.474	2040.3	102.307	3644.27	154.28	3555.57	106.523	0.517368
	4933426M11Rik	NM_178682	1277.3	107.386	1048.43	17.0467	2465.33	75.4196	2291.03	132.224	0.518105
	Gpc4	NM_008150	317.567	5.09782	307.733	33.6833	610.9	49.5666	522.5	24.2246	0.519835
	Crabp2	NM_007759	449.633	11.7538	400.1	6.01775	863.1	111.298	824.967	100.455	0.520951
	Gpc2	NM_172412	310.867	32.1784	269	15.8437	596.233	67.9428	459.033	15.0327	0.521385
	Fam20a	NM_153782	148.367	6.99389	133.067	1.39324	284.5	9.24175	227.8	9.16642	0.521501
	Tgfbr2	NM_009371	7786.07	828.995	6713.67	435.496	14916.8	603.462	14443.5	404.202	0.521967
	Gstt1	NM_008185	152.7	10.0201	140.567	4.83885	292.433	21.749	251.733	5.1953	0.522171
	Pmp22	NM_008885	742.667	22.9949	890.833	62.1318	1419.37	146.211	1554.93	96.8202	0.523237
	Pdgfrl	NM_026840	171	7.60285	169.767	2.66729	326.7	17.8126	270.133	12.232	0.523416
	Gbp3	NM_018734	161.1	2.36432	175.233	7.05132	307.567	15.6587	434.9	12.0674	0.523788
	Tmem66	NM_026432	2535	116.899	2235.53	81.8337	4839.3	150.801	4354.8	214.814	0.523836
	Cdkn2b	NM_007670	2664.17	106.866	2609.27	50.5319	5084.77	93.4576	5501.43	350.168	0.523951
	Hmox1	NM_010442	814.133	49.085	788.067	18.2368	1543.1	60.3119	1569.23	137.167	0.527596
	Zhx1	NM_009572	245.033	19.1969	228.733	8.64259	463.933	8.98412	382.033	20.1066	0.528165
	Rspo2	NM_172815	506.067	29.1029	597.933	47.8402	955.967	85.841	1054.97	46.7369	0.529377
	Llgl2	NM_145438	593.333	51.4233	528.333	46.2684	1120.67	90.9489	1090.2	90.8769	0.529445
	Nid2	NM_008695	3619.17	680.783	3707.67	436.501	6827.23	735.775	6966.53	267.72	0.530108
	Prkag1	NM_016781	732.967	51.502	696.067	51.4328	1382.37	92.0802	1348.63	68.118	0.530225
	Usp18	NM_011909	139	7.91981	140.067	4.16106	261.9	11.0014	354	9.94853	0.530737
	Ctns	NM_031251	492.467	9.19136	472.767	18.0274	927.033	99.8026	803.567	60.2617	0.531229
	Irx3	NM_008393	250.633	13.7872	262.333	23.2529	470.367	16.7342	390.3	30.5315	0.532846
	Cbr2	NM_007621	1448.67	56.8967	1372	39.2061	2712	65.5509	2655.07	46.3232	0.53417
	Mmp9	NM_013599	424.6	39.8328	367.867	10.7835	792.733	80.9677	604.267	64.7717	0.535615
	-	XM_131462	293.5	47.4455	297.533	20.6445	547.433	7.49318	479.933	11.8352	0.536139
	Timp3	NM_011595	2516.1	349.4	2726	250.106	4683.3	140.119	4527.27	286.18	0.537249
	Rassf2	NM_175445	292	23.0049	299.1	13.0117	543.167	53.3308	481.367	16.2598	0.537588
	Cacna1h	NM_021415	160.2	5.20032	157.7	8.91871	296.733	9.10427	228.667	22.2916	0.539879
	Ubtd2	NM_173784	847.967	57.2414	909.833	35.7048	1566.1	91.3938	1521.6	57.6993	0.541451
	Casp1	NM_009807	663.2	29.4812	554.233	18.9435	1218.37	123.566	1165.87	67.168	0.544334
	Skap2	NM_018773	1052.7	77.1237	1065.7	3.13209	1924.23	107.711	1777.6	22.3806	0.547076
	Pdzrn3	NM_018884	318.067	12.6618	374.167	18.6712	581.167	12.3159	533.033	29.8124	0.54729
	Tsga14	NM_031998	647.2	24.9548	876.433	31.9075	1178.67	106.671	1436.33	95.6715	0.549093
	Mfap2	NM_008546	164.233	6.91408	176.7	9.71202	298.867	25.8162	218.367	16.2974	0.549519
	Porcn	NM_145908	352.5	10.3099	325.4	8.05067	641.267	22.8008	525.733	18.2137	0.549693
	Tsc22d3	NM_001077364	430.7	19.3	456.333	21.2109	781.467	60.5744	827.133	13.6463	0.551143
	Ch25h	NM_009890	352.9	41.4515	312.367	35.12	639.433	36.0785	604.767	32.3178	0.551895
	Ddx25	NM_013932	538.767	37.9901	600.633	43.4389	975.3	73.265	872.633	54.426	0.552412
	Fzd1	NM_021457	553.7	51.9619	571.633	69.3965	1001.77	68.3507	1096.3	82.1125	0.552722
	Ctsa	NM_008906	790.867	85.9347	738.9	85.9809	1430.73	36.5694	1326.37	40.7748	0.552772
	Eppk1	NM_144848	395.667	14.7201	549.767	31.0199	715.1	64.8378	846.6	21.3854	0.553303
	Irgm2	NM_019440	144.167	8.58338	157.233	3.88773	260.533	13.9984	271.133	11.5343	0.553354
	Gpr19	NM_008157	312.8	7.30502	378.733	8.98041	564.833	15.5411	569.133	31.7209	0.553792
	Grb14	NM_016719	205.733	12.616	216.467	7.51584	371.4	40.4671	304.767	17.7877	0.553939
	Wbp5	NM_011712	5583.7	165.757	5891.53	120.064	10070.4	603.673	11384.4	546.324	0.554467
	Ptprd	NM_001014288	304	35.0046	324.467	27.5846	547.533	11.622	525.267	19.2489	0.555218
	Lmcd1	NM_144799	331.767	10.5975	425.133	5.48948	597.533	26.5696	660.733	21.4548	0.555228
	H13	NM_010376	554.4	101.528	601.433	70.8057	997.833	41.9612	853.767	32.1167	0.555604
	Col23a1	NM_153393	263.033	3.63792	227.033	6.22102	472.333	54.6193	370.233	43.1942	0.55688
	Bex2	NM_009749	749.033	46.1834	777.667	71.1211	1343.6	14.0358	1592.87	95.0057	0.557482
	C2	NM_013484	316.467	15.6053	275.267	20.4177	567.667	34.9995	486.9	6.64931	0.557487
	Gpr176	NM_201367	2058.07	401.952	2262.9	346.429	3688.43	427.383	4643.13	382.01	0.55798
	Pla1a	NM_134102	438.933	56.6834	479.467	27.2736	785.4	54.5451	924.533	53.5032	0.558866
	Parp14	NM_001039530	122.467	10.0187	123.933	3.86667	218.833	2.48484	266.3	3.98037	0.559637
	Tnni2	NM_009405	309.4	26.2001	378.867	32.1467	552.4	45.581	722.4	79.2421	0.560101
	Dag1	NM_010017	896.033	72.1102	787.867	48.3127	1597.23	101.89	1423.23	104.888	0.560992
	Apol10b	NM_177820	133.3	2.49867	131.633	4.78063	237.5	19.29	277.1	24.0583	0.561263
	H2-D1	NM_010398	422.933	18.6739	436.567	18.8843	753.333	14.3189	834	90.3207	0.561416
	Nkd2	NM_028186	172.267	8.84408	155.4	7.15821	306.467	30.0183	296.967	22.3612	0.562106
	Tle4	NM_011600	750.467	31.9191	773.5	7.90759	1335.03	50.9857	1303.57	24.9876	0.562135
	Marcks	NM_008538	3110.87	126.569	2452.87	159.065	5518.9	673.534	4794.53	217.799	0.563676
	Sertad4	NM_198247	1374.17	75.3342	1577.57	128.747	2435.3	188.983	2591	94.5296	0.564271
	Rbms3	NM_178660	997.9	23.1	1392.17	50.8559	1762.07	86.0716	1933.37	142.912	0.566323
	Pdzrn3	NM_018884	1748.27	86.468	1741.97	47.6806	3077.4	267.459	2881.07	347.63	0.5681
	Bex4	NM_212457	492.833	18.8392	575.5	50.5143	867.367	36.9239	1333.93	24.0461	0.568194
	Sec24d	NM_027135	799.167	87.8555	718.267	50.9361	1403.17	88.1958	1382.33	102.359	0.569544
	Tgfbr2	NM_009371	212.467	7.82823	205.867	10.6067	372.833	17.3496	401.5	13.788	0.569872
	Pbxip1	NM_146131	2980.33	195.999	2890.47	178.398	5223.9	186.417	4785.87	198.286	0.570518
	Trp63	NM_011641	115.6	3.25013	115.5	4.57056	202.167	15.0157	253.9	12.438	0.571804
	Aoc3	NM_009675	162.967	17.2264	156.667	6.49239	284.8	12.143	229.167	8.06315	0.572216
	Pgam2	NM_018870	167.767	8.03126	162.067	9.38693	293.133	19.2901	231.7	15.6404	0.572324
	Ddah2	NM_016765	2302.7	36.707	2324.73	95.5693	4023.23	92.1256	3714.77	202.897	0.572351
	Mxra8	NM_024263	1006.23	64.2554	867.9	42.4943	1756.17	59.6823	1348.6	72.3144	0.572968
	Bsdc1	NM_133889	357.033	30.7041	355.167	19.1094	621.9	38.1218	518.667	42.0471	0.5741
	Cryab	NM_009964	1915.97	47.1832	2172.6	208.872	3329.73	198.077	3743.73	118.25	0.575413
	Nnat	NM_010923	147.633	13.0831	145.5	13.7019	256.2	17.35	310.267	15.9692	0.576241
	Lsp1	NM_019391	349.033	9.57328	400.3	14.8637	605.133	85.0323	711.567	45.4077	0.576787
	Plscr2	NM_008880	163.633	6.91721	164.5	9.25797	283.5	24.9127	386.533	26.9732	0.577189
	Ddit3	NM_007837	581	74.2644	680	61.4305	1006.3	35.2796	910.267	18.9288	0.577363
	Slc16a4	NM_146136	273.067	8.42404	162.733	2.43607	472.833	35.7477	270.033	10.8936	0.577513
	Palld	NM_001081390	1563.03	106.711	1633.97	145.917	2705.3	169.857	2533.2	111.551	0.577766
	Gpx7	NM_024198	426.933	37.8926	365.4	18.6752	738.267	71.8693	707.633	20.3881	0.578291
	Olfr56	NM_008330	271.633	9.12694	303.067	6.33938	468.967	41.1793	580.733	24.7223	0.579216
	Rasl11b	NM_026878	255.933	11.2146	219.2	12.0193	441.4	12.7649	362.2	23.8865	0.579821
	Nfib	NM_008687	1755.27	78.6751	1781.03	39.5856	3027.07	221.707	2970.8	123.47	0.579858
	Ssbp3	NM_198438	383.8	10.9	417.033	16.3162	661.833	8.04287	673.833	19.2591	0.579905
	Cmpk1	NM_025647	1112.7	100.69	981.7	109.618	1918.43	123.071	1817.6	60.3888	0.580006
	Dnajb4	NM_025926	780.733	58.1017	808.733	106.375	1344.4	116.339	1484	108.064	0.58073
	Zhx1	NM_009572	198.233	3.98595	179.433	5.56457	341.267	11.7424	287.467	15.78	0.580874
	Stk17b	NM_133810	684.367	33.4943	938.6	13.8897	1176.27	80.2533	1378.47	19.7442	0.581811
	Rcn3	NM_026555	399.467	29.6342	370.2	31.7303	686	36.4862	569.667	34.3373	0.582313
	Thbs2	NM_011581	118.3	2.10079	120.6	4.72264	203.133	11.0731	173	6.73523	0.582377
	Rell1	NM_145923	1882.2	157.635	1719.43	183.21	3229.2	89.6826	2953.2	137.22	0.582869
	-	XM_355606	253.867	2.25783	213.467	12.7515	434.667	17.3596	400	22.9589	0.584049
	Copz2	NM_019877	605.667	11.866	572.2	20.0866	1036.9	77.9734	839.367	60.4643	0.584113
	Fam110b	NM_173426	249.6	9.22442	212.333	5.77042	426.267	21.4249	328.067	7.76538	0.585548
	Tceal5	NM_177919	401.833	32.8442	399.533	31.2942	685.567	53.1498	754.433	38.8847	0.586132
	Pitx2	NM_011098	1199.8	44.1772	1440.33	40.2367	2044.37	94.5998	2268.03	151.985	0.58688
	Bdh1	NM_175177	349.867	32.0646	277.633	12.0985	595.4	55.9572	557.4	54.8932	0.587617
	Mxra8	NM_024263	441.767	38.0997	385.567	8.04204	751.1	34.8615	581.233	6.9602	0.58816
	Arrdc4	NM_025549	290.533	14.3427	296.267	6.84503	493.833	28.6353	576.133	18.4487	0.588322
	Sema3a	NM_009152	665.3	23.499	815.3	16.7502	1130.3	65.0952	1226.5	47.9151	0.588605
	Fam167a	NM_177628	471.2	33.573	478.4	55.6638	799.9	35.8935	718.6	3.28836	0.589074
	Fam169b	NM_001013811	216.8	8.60252	240.167	10.8361	367.967	32.1161	440.033	56.3496	0.589183
	Pik3r3	NM_181585	1786.37	43.0489	1669.1	37.4027	3025.6	129.738	2687.13	179.027	0.590418
	St3gal5	NM_011375	793.2	64.5175	695.267	8.82144	1343.3	125.152	1263.57	87.7566	0.590486
	Tnnc2	NM_009394	154.733	2.03333	160.7	4.41173	261	16.9477	283.733	26.2263	0.592847
	Palm2	NM_172868	129.6	6.78994	127.8	2.72213	218.6	10.1484	202.133	9.75403	0.592864
	Igtp	NM_018738	133.4	8.06494	124.067	2.64344	225	12.0068	255.467	5.03002	0.592889
	-	NM_177357	119.4	7.12905	132.933	2.65351	201.367	14.7113	223.233	18.2386	0.592947
	Amotl2	NM_019764	252.833	26.6641	237.567	27.1888	426.267	37.7455	413.167	31.5708	0.593133
	Cd248	NM_054042	788.467	69.1111	636.467	75.2827	1327.67	134.36	771.067	59.1482	0.593873
	Mycl1	NM_008506	129.6	3.7581	149.933	4.48714	217.8	15.9544	245.7	9.61613	0.595041
	-	NM_001081015	159.333	6.3357	176.233	10.4257	267.433	20.0242	310.733	14.4049	0.595787
	Bzrap1	NM_172449	157.767	4.63909	151.267	17.6698	264.567	5.34925	262.467	10.3895	0.596322
	Ly6f	NM_008530	223.567	14.9439	242.433	14.4611	374.7	19.8102	503.333	30.8918	0.596656
	Mansc1	NM_026345	234.733	4.2881	201.067	16.5868	393.3	34.3104	338.167	15.1721	0.596829
	Zfhx3	NM_007496	2254.3	213.177	2221.63	162.451	3774.5	54.0316	3324.43	167.484	0.597245
	Psmb9	NM_013585	155.5	8.56096	154.3	3.82797	260.3	8.80473	268.567	12.8361	0.597388
	Dnaja3	NM_139307	2145.27	4.01096	1761.73	78.4163	3590.6	267.563	2753.47	106.187	0.597468
	Fam114a1	NM_026667	648.2	30.4756	542.5	23.6528	1084.1	42.4717	786.4	36.3666	0.597915
	Csrp2	NM_007792	3234.63	69.808	2365.47	44.5693	5408.73	355.507	3681.23	166.655	0.598039
	St3gal5	NM_011375	447.8	11.0639	369.633	14.3708	747.933	27.1927	656.8	41.1889	0.598717
	Tmem66	NM_026432	562.2	62.5129	491.967	22.2685	937.367	20.7808	811.333	29.216	0.599765
	Car13	NM_024495	1117.77	108.523	1035.4	76.9588	1862.83	93.1903	1929.57	38.1809	0.600039
	-	NM_198678	1396.1	59.8776	1150.1	49.4175	2313.5	82.5934	2048	96.0435	0.603458
	Tmem66	NM_026432	3803.6	264.847	3338.27	183.202	6300	425.478	5577.6	42.7314	0.603746
	Wisp2	NM_016873	133.833	7.3687	123.267	3.01791	221.4	14.1507	232.4	14.3827	0.604485
	Klc4	NM_029091	434.467	25.2098	339.933	35.3457	718.633	26.0024	574.9	15.3644	0.604574
	Pitx2	NM_001042502	3201.03	133.09	3700.8	186.144	5288.63	76.9333	5687.67	411.351	0.605266
	Il18	NM_008360	121.1	6.78847	121.967	1.68951	199.9	4.24421	201.333	12.5082	0.605803
	Ednra	NM_010332	137.933	6.04327	122.3	0.873689	227.4	11.3298	157.567	5.43211	0.606566
	Ngfrap1	NM_009750	4852.57	222.317	5084.27	104.835	7986.47	286.27	9553.9	55.7684	0.607599
	Ifit2	NM_008332	310.067	11.5553	319.167	9.94407	510.233	43.3939	645.967	42.2169	0.607697
	Magi1	NM_010367	386.233	21.7847	452.867	30.1681	634.467	46.8078	655.6	39.1727	0.608752
	Pou6f1	NM_010127	156.7	10.2015	144.467	5.84076	257.267	11.2974	178.2	19.2204	0.609095
	Gm1673	NM_001033458	413.033	26.7313	386.4	32.6589	677.467	40.9374	598.667	11.813	0.609673
	1110003E01Rik	NM_133697	1901.67	183.404	1667.27	50.6185	3110	98.8293	2514.13	94.0337	0.611469
	Pdpn	NM_010329	1398.93	85.4192	1363.3	49.8975	2287.67	101.222	2274.97	122.575	0.611509
	Tmem86a	NM_026436	773.5	43.3482	600.1	11.0206	1263.63	119.503	1034.07	85.9431	0.612125
	Psmb10	NM_013640	1143.27	67.0382	1094.47	14.8257	1866.77	61.1468	1823.83	45.601	0.612432
	2310046K01Rik	NM_027172	197.3	1.27671	189.533	5.04656	322.133	10.7172	373.4	27.2929	0.61248
	Isg15	NM_015783	481.367	3.57833	525.267	43.947	785.9	33.4838	1051.27	77.3826	0.612504
	Tjap1	NM_028751	651.267	75.0331	674.6	59.732	1062.4	56.4802	1035.7	92.3139	0.613015
	Tubg2	NM_134028	264.533	6.22798	276.033	16.4025	431.233	6.30776	374.833	9.08503	0.613434
	Sepx1	NM_013759	1238.13	74.6271	1367.2	104.378	2018.33	145.617	2221.33	226.374	0.613443
	Itgb5	NM_010580	4841.97	420.993	4495.27	230.816	7879.1	298.789	5923.13	257.364	0.614533
	Ddt	NM_010027	1195.17	133.434	1253.5	45.9797	1935.8	80.6577	1764	32.2795	0.617404
	Lpar4	NM_175271	248.167	9.41459	215.467	19.4024	401.733	10.0101	402.633	11.5793	0.617741
	Pak3	NM_008778	190.867	17.2111	194.667	11.787	308.8	22.5965	297.2	10.4006	0.618093
	Pex19	NM_023041	2571.83	115.596	2180.5	109.735	4160.63	18.5333	4431.6	264.33	0.618135
	Mapt	NM_010838	142.867	9.20984	148.5	5.42433	231	12.5096	234.667	17.4444	0.618472
	Gbp3	NM_018734	157.633	3.83507	186.767	8.01589	254.833	10.9621	344.433	30.0979	0.618574
	Jdp2	NM_030887	934.967	44.5079	1015.77	13.8031	1508.73	159.884	1556.07	62.2455	0.619705
	Mmp11	NM_008606	230.633	6.01286	206.7	20.1219	372.133	26.3021	310.167	10.4436	0.61976
	-	NM_011191	1841.23	112.384	1804.37	89.4333	2962.87	119.109	2829.1	120.351	0.621435
	Syt11	NM_018804	893.733	77.4012	1266.27	45.1066	1438.1	78.9373	1795.53	112.474	0.621468
	Bex1	NM_009052	215.167	25.8821	258.7	25.2508	346.2	40.0757	507.067	60.0525	0.621511
	-	XM_132755	145.033	6.8863	161.367	7.01815	233.3	6.07975	274.3	5.70468	0.621659
	Manea	NM_172865	518	24.5864	435.333	27.3235	833	79.5073	793.7	56.9405	0.621849
	Lpl	NM_008509	661.4	9.17842	527.467	22.576	1062.27	13.3079	974.733	84.6483	0.622629
	Flywch2	NM_029798	308.4	18.1087	287.6	6.70149	494.567	36.4888	472.967	8.73104	0.623576
	Mospd1	NM_027409	722.9	32.3049	782.767	44.2093	1158.77	36.9542	1148.17	3.86839	0.623851
	Fndc3b	NM_173182	4157.5	182.597	3839.47	143.338	6661.2	311.145	6477.17	65.1795	0.624137
	Zfp36l1	NM_007564	2121.87	9.6696	2228.37	306.677	3398.07	51.5652	3315.93	63.7915	0.624434
	Maged2	NM_030700	1905.47	122.166	1565.37	66.3906	3050.77	329.036	2199	83.0834	0.624587
	Lgals9	NM_010708	931.133	57.767	999.967	45.4803	1489.1	109.501	1362.9	62.3454	0.625299
	Aif1l	NM_145144	7338.67	687.775	8167.7	480.054	11704.2	1283.96	13397.4	806.953	0.627012
	Pgcp	NM_176073	159.967	6.51315	156.467	7.48539	254.6	5.3454	225.633	8.06832	0.628307
	-	NM_010884	1905.67	136.943	1700.97	40.1767	3031.6	176.296	2869.83	280.606	0.628602
	Lgals3bp	NM_011150	484.067	34.6658	391.2	9.00685	769.867	8.93613	688.233	23.1678	0.628767
	Serf1	NM_011353	1815.13	276.903	1917.53	17.2202	2886.7	135.48	2718.63	65.2938	0.628791
	Dusp1	NM_013642	2179.63	139.608	1584.5	184.532	3465.4	195.758	2616.83	229.663	0.628969
	-	NM_198165	1820.03	127.367	1578.7	39.9241	2893.2	63.5713	2548.63	117.562	0.629072
	Pcdhb22	NM_053147	577.533	31.9148	549.6	13.15	917.7	47.8942	794	56.1644	0.629327
	H2-Q7	NM_010394	195.733	3.13174	218.067	7.34628	310.8	13.8134	381.067	18.0465	0.629772
	Per2	NM_011066	301.2	25.3225	346.933	10.5956	478.233	32.2744	450.867	11.4173	0.629819
	Apaf1	NM_001042558	682.133	40.9356	707.8	7	1082.67	31.1189	1283.2	60.6757	0.630047
	Adm	NM_009627	129.933	6.20278	128.367	3.2936	205.967	6.84211	238.6	26.4076	0.630844
	Sap30	NM_021788	1551.1	79.5419	2066.73	166.575	2458.67	195.193	3206.63	79.0194	0.63087
	Snx30	NM_172468	201.6	12.5385	168.567	4.73369	318.567	28.1978	248.633	24.2086	0.632834
	Nupr1	NM_019738	4332.67	328.645	4441.13	286.146	6843.83	260.033	7585.17	299.722	0.633077
	Tpm2	NM_009416	6492.13	503.45	6773.27	373.527	10246.4	653.465	10497.7	863.107	0.633601
	Gng11	NM_025331	185.067	14.9949	167.433	11.1293	292.067	3.8843	293.433	20.152	0.633646
	Mllt11	NM_019914	1495.43	211.958	1158.57	155.396	2353.9	189.152	2102.47	37.8204	0.635299
	Tnc	NM_011607	626.867	68.8206	512.067	37.8575	986.033	84.3766	852.333	59.0131	0.635746
	Creb3	NM_013497	730.067	42.6746	750.867	37.6533	1146.63	40.7883	1046.63	48.1135	0.636707
	-	XM_196324	203.867	13.0596	199.3	5.95063	319.567	20.0308	234.9	1.5695	0.637948
	-	XM_284281	657.8	20.5709	707.433	25.2385	1030.47	112.851	1102.5	27.6903	0.638349
	Kctd6	NM_027782	881.467	40.9188	1013.47	96.3504	1379.3	18.4565	1470.1	9.12159	0.639068
	Mal	NM_010762	1052.73	149.753	928.667	76.5118	1644.9	135.477	1745.13	18.178	0.639996
	Tlr6	NM_011604	240.067	8.794	257.3	6.40807	374.9	17.4061	449.233	20.4803	0.640349
	Gm129	NM_001033302	380.3	19.8873	478.833	43.0045	593.233	62.8311	733.467	55.6693	0.641063
	Tapbpl	NM_145391	320.7	3.74032	331.967	16.8453	499.767	23.4358	581.367	13.3609	0.641699
	Pou3f1	NM_011141	145.067	1.02035	154.2	6.76855	225.7	19.0637	235.1	10.3942	0.642743
	Psmb10	NM_013640	1396.9	58.8851	1258.7	17.0063	2172.97	126.104	2108.1	78.2455	0.642853
	Myd116	NM_008654	841.2	71.4394	762.533	41.5715	1308.53	71.9724	1147.27	40.073	0.642859
	Ifit2	NM_008332	260	8.09341	262.033	4.0769	404.433	44.7697	525.4	31.8199	0.642875
	H3f3a	NM_008210	285.267	10.6543	306.167	19.0356	443.533	18.6287	459.167	24.1598	0.64317
	Stard5	NM_023377	311.233	21.1246	297.933	20.5453	483.9	27.0692	471.167	43.9312	0.643176
	Gdpd1	NM_025638	723.433	22.6662	735.1	35.5158	1124.57	55.287	1188.6	60.12	0.643297
	Il11ra1	NM_010549	1644.13	67.8617	1622.77	111.752	2555.3	38.5194	2229.97	55.182	0.64342
	Lrig3	NM_177152	1155.03	140.663	891.633	47.342	1788.83	135.734	1751.83	103.837	0.64569
	1700025K23Rik	NM_183254	417.967	41.819	517.267	15.2123	646.633	40.2173	770.367	24.264	0.646374
	Mxd4	NM_010753	279.167	16.5302	235.367	12.5242	431.267	19.2917	366.167	8.23495	0.647318
	Foxp1	NM_053202	550.867	13.2364	589.333	17.5119	850.867	43.1175	888.733	19.3502	0.647418
	Fam164a	NM_173181	657.233	37.5369	685.233	25.638	1010.77	59.4392	1006.2	35.252	0.65023
	Scand3	NM_183088	207.9	7.38196	241.067	12.1016	319.533	14.3945	379.567	5.58341	0.650637
	Repin1	NM_175099	381.733	33.2861	395.033	26.0752	586.467	16.6945	644.733	2.66604	0.650903
	Ypel5	NM_027166	250.5	30.2604	217.2	30.5012	384.767	4.86118	318	20.9179	0.651043
	Arhgef18	NM_133962	2018.77	158.942	1844.87	105.834	3100.6	136.052	2745.3	37.2464	0.65109
	Abat	NM_172961	310.033	20.872	327.467	18.7135	475.933	33.9026	406.4	14.1302	0.651422
	LOC547349	NM_001081032	256.4	21.8464	263.333	23.8403	393.067	11.3895	399	18.6656	0.652306
	Mdk	NM_001012335	269.333	18.3628	306.067	16.8238	412.667	24.7187	434.933	10.455	0.652664
	4933428G20Rik	NM_021493	1058.97	80.367	916.833	58.4183	1621.33	129.365	1362.7	40.0073	0.653149
	Gsdmd	NM_026960	999.5	40.8857	971.4	74.5882	1529.53	67.8367	1608.37	27.8524	0.653469
	Tmem205	NM_178577	433.8	14.5569	393.7	28.231	663.4	29.8135	558.733	12.7877	0.653904
	-	NM_001033207	125.067	7.76688	116.5	0.378594	191.233	3.79049	168.533	7.72277	0.654003
	Ccdc68	NM_201362	386.8	28.3194	533.6	36.4259	591.333	86.937	950.533	114.726	0.654115
	Prrg2	NM_022999	353.767	12.9849	365.167	32.4312	540.667	33.482	533.733	23.4277	0.654316
	Rnf40	NM_172281	862.733	52.7826	1012.8	56.8806	1318.2	45.0823	1395.83	86.8	0.654478
	Irf1	NM_008390	414.433	36.1158	376.333	17.4709	633.133	31.0927	644.867	21.02	0.654575
	Foxc1	NM_008592	838.133	22.063	879.1	68.1048	1280.27	55.0034	1363.83	40.5764	0.654653
	Sobp	NM_175407	273.733	5.01941	294	17.4738	417.933	24.3745	388.733	6.60362	0.654969
	Fkbp10	NM_010221	1273.9	38.9618	1240.77	107.115	1944.83	112.72	1767.8	146.735	0.655019
	Tmub1	NM_022418	340.9	16.9662	380.033	10.134	520.367	46.7056	516.367	20.4475	0.655115
	Adamts1	NM_009621	311.2	32.1016	204.833	3.36171	474.933	3.64478	328.2	10.9546	0.65525
	Pdlim7	NM_026131	5307.7	334.872	6115.27	388.983	8099.27	403.179	8805.17	192.287	0.655331
	Hist1h4h	NM_153173	332.1	7.18633	320.867	13.1638	506.033	11.0584	393.5	15.1071	0.656281
	Nbl1	NM_008675	1181.77	43.0652	933.367	30.1846	1800.7	77.1509	1246.93	56.6254	0.656284
	2310007B03Rik	NM_172411	132.933	7.12141	163.2	9.95942	202.4	4.95681	255.467	26.2537	0.656784
	Pmp22	NM_008885	192	21.0925	203.533	13.513	292.3	17.2722	310.2	17.9595	0.656859
	-	XM_284281	595.167	34.5003	652.533	38.9718	905.467	81.6757	960.667	51.4989	0.657304
	Irf1	NM_008390	369.933	38.3767	349.333	25.3778	562.8	11.0639	557	38.7248	0.657308
	Adarb1	NM_130895	224.8	11.3808	232.333	14.3986	341.367	10.7984	324.967	15.7279	0.658529
	Fam107a	NM_183187	120.833	6.41777	121.533	6.49624	183.367	10.6198	187	11.212	0.658968
	Lix1	NM_025681	129.633	9.855	137.667	5.77504	196.633	9.43263	203.433	15.2097	0.659264
	Mmp23	NM_011985	671.867	18.4428	640.8	53.1247	1017.57	56.5823	891.167	13.7548	0.660266
	Hexa	NM_010421	2743.83	129.889	2521.8	85.0101	4153.7	166.619	3601.67	120.021	0.660575
	Fam164a	NM_173181	947.3	75.6032	903.833	19.2262	1433.5	65.8385	1418.33	52.1952	0.66083
	Ptk7	NM_175168	1207.4	83.0564	956.233	35.0329	1826.73	75.8684	1559.2	9.26301	0.660962
	Mal	NM_010762	515.8	51.8987	502.2	51.4327	780.133	57.8832	908.1	61.2463	0.661169
	Josd2	NM_025368	610.433	11.8266	677.967	32.362	923.133	39.2323	883.9	44.9095	0.661262
	Qpct	NM_027455	266.467	15.3851	242.733	12.2758	402.933	14.2849	393.567	5.39949	0.661318
	Mex3a	NM_001029890	820.2	29.4349	979.433	59.0484	1239.87	48.5085	1427.83	62.6261	0.661521
	Zfp36l1	NM_007564	4160.03	320.057	4248.77	248.593	6279.87	316.29	5943.53	23.1642	0.662439
	Fktn	NM_139309	231.2	19.936	260.967	6.72119	348.733	29.7736	375.933	13.9277	0.662971
	Ing4	NM_133345	938.9	30.8432	904.633	64.1228	1416.03	93.8912	1233.3	84.4062	0.663051
	Ddit4l	NM_030143	136.333	5.91533	141.4	5.51755	205.6	2.11975	169	6.67757	0.663098
	Chfr	NM_172717	2183.07	130.415	2142.97	75.3968	3290.53	181.788	2977.83	75.2489	0.66344
	Ddit3	NM_007837	548.867	69.1631	575.233	40.5648	827.267	45.2915	830	30.1458	0.66347
	Tlr2	NM_011905	407.533	3.73021	440.4	5.85064	614.167	29.6667	761.167	33.2493	0.663554
	Pias4	NM_021501	554.933	33.9291	586.833	7.35988	835.933	24.9321	838.9	40.42	0.663849
	Igfbp7	NM_008048	15817.9	1609.58	15591.5	1347.04	23821.4	1515.29	23719.9	159.491	0.664021
	Sobp	NM_175407	276.1	6.59621	276.533	11.0135	415.7	11.5326	339.1	11.5052	0.664181
	Cdkn1a	NM_007669	1406.63	45.1502	1392.23	82.4638	2116.8	38.5176	2312.03	220.514	0.664508
	Tmsb10	NM_025284	11195.7	570.139	11916.1	186.78	16845.2	425.693	16535.1	310.972	0.664623
	Calml4	NM_138304	233.633	7.0134	197.567	1.68556	350.933	30.2282	308.5	3.66924	0.665748
	Cyp4v3	NM_133969	174.6	2.52389	162	6.05558	262.2	2.11266	274.733	11.9834	0.665904
	Lmcd1	NM_144799	209.3	17.3811	231.567	9.56684	314.133	27.4015	338.9	18.5495	0.666278
	Acvr1	NM_007394	1509.23	37.0199	1293.33	28.841	2263.77	101.447	1883.87	138.517	0.666689
	Rell2	NM_153793	269.767	11.611	230.9	4.88672	403.9	22.3288	296.5	4.05832	0.667905
	Pon3	NM_173006	494.333	23.9797	471	23.9667	739.633	56.3662	701.533	37.3128	0.668349
	Tmem205	NM_178577	514.3	13.8338	462.333	25.172	769.033	27.9136	663.167	4.45808	0.668762
	Zfp46	NM_009557	869.133	15.6321	916.067	74.7513	1298.67	65.8644	1377.47	96.7971	0.669249
	Prnp	NM_011170	6135.77	286.371	6277.23	401.342	9155.8	635.684	8687.6	321.774	0.670151
	-	XM_484040	182.433	5.34052	183.467	2.47409	271.967	10.0989	258.267	24.535	0.670791
	Ttyh3	NM_175274	474.1	33.7368	442.033	17.3671	706.233	26.5817	599.5	49.5808	0.671308
	Gpsm1	NM_153410	670.067	62.7093	620.367	22.7384	997.7	66.3099	879.6	62.9073	0.671612
	Rbak	NM_021326	440.8	18.9099	433.9	14.068	655.167	8.34293	595.2	13.1761	0.672806
	Ddr1	NM_007584	1585.87	109.02	1430.57	115.628	2355.9	90.2915	2191.37	57.9807	0.673148
	Zhx1	NM_009572	145.6	3.48282	153.4	8.39305	216.167	1.76383	189.6	2.38607	0.673553
	Epb4.1l3	NM_013813	3768.93	25.3035	3396	258.656	5595	566.677	4695	151.18	0.673625
	Irf9	NM_008394	544.267	15.8713	566.033	13.6902	807.5	22.7511	794.2	9.65004	0.674015
	Prrc1	NM_028447	923.833	46.3851	692.3	28.1727	1370.4	72.9586	980.9	84.5502	0.674134
	Pex19	NM_023041	846.033	78.9226	855.867	38.9718	1254.73	21.2008	1321.8	31.5529	0.674275
	Stx5a	NM_019829	3806.03	153.218	4105.67	45.8824	5642.13	455.116	5253.37	149.034	0.674573
	Golim4	NM_175193	1222.23	67.246	1199.17	58.7597	1811.77	110.419	1692.13	51.3333	0.674605
	Nicn1	NM_025449	1279.57	97.023	1682.7	103.087	1896.4	74.015	2531.6	71.0925	0.674736
	Hbp1	NM_153198	2413.4	183.59	2416.27	119.466	3574.4	69.8206	3838.63	144.719	0.67519
	Gas6	NM_019521	224.9	27.7479	220.133	2.53925	332.8	20.4962	322.767	10.4557	0.675781
	Ifit3	NM_010501	152.167	2.08513	163.6	4.96689	225.167	9.18955	273.767	11.4019	0.675796
	Enpp2	NM_015744	127.2	4.64866	117.567	0.868588	188.067	9.1136	149.067	13.9224	0.676355
	Zfp41	NM_011759	496.867	34.2799	605.267	11.7935	734.2	25.1421	899.033	15.8424	0.676746
	Srf	NM_020493	1777.4	84.8225	2303.23	58.6182	2623.23	193.53	2732.03	135.172	0.677562
	Gja1	NM_010288	9048.53	427.011	9514.13	637.621	13354.2	610.149	12938.5	353.921	0.677579
	Bhlhe40	NM_011498	2747.03	96.9617	2198.87	41.0132	4051.47	143.112	3906.13	61.9796	0.678033
	Aldh4a1	NM_175438	1355.53	77.8148	1264	66.1936	1997.2	62.5039	1826.9	12.4857	0.678715
	Lgals9	NM_010708	499.633	11.3692	475	13.7215	734.867	29.6077	716.367	35.3846	0.679896
	Pdgfa	NM_008808	5444.9	33.6097	5733.2	63.0672	8006.03	181.942	8792.73	384.025	0.6801
	Accs	NM_183220	254.767	5.93249	249.567	5.63954	374.467	8.62484	329.4	11.0503	0.680346
	Tmem63a	NM_144794	718.667	31.2641	726.8	10.9464	1054.3	55.1511	932.267	26.6757	0.681653
	Igf2	NM_010514	16902	928.013	18723.7	1345.8	24790.9	1893.25	25614	1022.24	0.681782
	Gmds	NM_146041	842.333	24.0949	1018.23	32.626	1235.3	80.7244	1212.77	32.6209	0.681885
	Aph1b	NM_177583	419.8	20.9001	420.933	8.32052	615.267	19.936	583.633	25.2456	0.682305
	Uchl1	NM_011670	570.567	19.6944	608.767	26.1302	836.133	52.1368	899.867	53.8361	0.682388
	2310022B05Rik	NM_175149	4774.77	354.87	4051.13	330.249	6994.87	270.515	6127.93	142.827	0.68261
	Arl4c	NM_177305	586.7	39.1266	611.5	34.5115	859.467	56.816	1074.23	44.4119	0.682632
	Atp6v0b	NM_033617	1834.07	90.2632	1847.57	44.8284	2686.47	82.332	2481.83	102.691	0.682706
	Bet1l	NM_018742	503.233	10.5964	520.333	31.3938	736.933	10.2668	691.367	30.9026	0.682875
	Arfgap1	NM_145760	1027.23	41.8916	1032.9	51.4006	1503.3	38.3367	1304.5	29.168	0.683317
	Gpc3	NM_016697	118.567	3.71947	121.7	7.76938	173.1	11.0436	181.8	11.6228	0.684962
	Mtap7d1	NM_144941	4213.33	150.929	3691.2	136.272	6147.13	326.365	5626.2	185.97	0.685414
	Mphosph6	NM_026758	1301.4	41.1613	1144.5	27.948	1896.67	56.3183	1876.43	60.0972	0.68615
	Hspb6	NM_001012401	3977.07	203.767	4331.87	130.829	5795.13	196.848	6207.33	123.842	0.686278
	Copz2	NM_019877	630.467	24.6134	554.867	43.875	918.633	49.1171	840.367	39.556	0.68631
	2010111I01Rik	NM_028079	619.3	66.3422	581.633	27.036	901.867	37.3593	918.633	51.1079	0.686687
	Marcksl1	NM_010807	3496.8	173.966	3162.57	95.6529	5091.2	283.74	4878.93	104.578	0.686832
	Gtpbp2	NM_019581	1456.97	212.198	2290.23	86.3336	2121.23	50.7429	2504	81.2157	0.686851
	Armcx3	NM_027870	199.467	1.96412	195.8	5.94306	290.3	3.17857	252.333	27.9431	0.687106
	Sorbs1	NM_001034964	161.533	6.36771	161.6	4.24421	235	9.92891	280.3	18.5209	0.687374
	Nedd9	NM_017464	1316.97	96.2555	1628.1	135.622	1915.73	50.4331	2383.7	76.4912	0.687451
	Fbxl22	NM_175206	141.2	4.10163	121.433	0.768838	205.2	7.9019	162	7.71751	0.688109
	Htra3	NM_030127	140.933	5.08243	133.467	6.16613	204.767	10.1078	171.533	15.0373	0.68826
	Pla1a	NM_134102	246.6	13.3133	231.933	13.9492	358	12.0006	358.933	15.3139	0.688827
	Ahcyl1	NM_145542	3909.67	137.679	4154.6	59.2095	5668.27	323.478	5880	192.331	0.689747
	Plod2	NM_011961	333.6	24.5006	286.067	13.6988	483.533	24.8289	453.367	14.2933	0.689922
	Cdc42ep2	NM_026772	630.1	72.4644	712.433	46.5364	912.8	18.791	983.067	46.857	0.690294
	-	XM_129987	205.733	13.3678	179.3	5.9079	297.833	29.5452	197.967	4.14501	0.690766
	Gzmm	NM_008504	159.033	6.42763	126.9	3.25167	230	15.9502	180.067	9.81026	0.691448
	Gsdmd	NM_026960	433.6	19.0143	445.2	8.48901	627.067	15.4924	687.867	20.0217	0.691473
	Asb4	NM_023048	168.433	17.0339	174.7	8.56096	243.567	25.269	293.233	13.548	0.691526
	Grn	NM_008175	5136.83	388.804	4505.4	256.316	7427.03	86.0177	7043.5	281.316	0.69164
	Disp1	NM_026866	777.933	82.7941	779.167	38.1403	1124.73	25.2261	1117.1	30.1818	0.691662
	Trafd1	NM_172275	383	9.3675	358.467	21.4193	553.3	33.2653	563.567	18.562	0.69221
	Unc5c	NM_009472	118.9	2.85715	138.233	4.62469	171.7	4.75079	187.167	6.36405	0.692487
	B4galt3	NM_020579	1297.77	87.9717	1257.2	49.9514	1873.53	49.6898	1813.1	59.8406	0.692687
	Lmod1	NM_053106	134.2	1.92873	143.3	6.7951	193.133	6.63936	191.267	5.21739	0.694858
	Itprip	NM_001001738	429.833	55.8114	346.367	30.5036	618.467	14.0352	606.133	11.7876	0.694997
	Hic1	NM_010430	117.3	4.87579	115.033	3.85242	168.6	6.15873	141.7	10.2137	0.69573
	Unc84b	NM_194342	3341.4	253.686	5618.67	264.275	4802.5	145.111	7679.8	209.52	0.695763
	Hfe	NM_010424	215.567	10.6921	244.133	14.6677	309.7	12.2055	304.5	4.07226	0.696051
	Hice1	NM_029621	661.067	40.0642	761.033	3.71229	949.4	47.8932	1234.03	24.5874	0.6963
	Fam26e	NM_178908	137.633	5.8607	175.133	18.5769	197.467	8.0466	222.367	8.90774	0.696992
	Usp2	NM_198091	204.167	10.9721	234.767	14.9052	292.7	16.2382	321.133	7.03949	0.69753
	Tjap1	NM_028751	849	54.9314	796.1	37.2111	1216.63	88.3842	1197.6	72.4696	0.697829
	Lag3	NM_008479	113.933	5.22505	112.767	7.79366	163.267	4.21162	158.6	8.94371	0.697832
	Ets2	NM_011809	1663.53	146.142	1455.53	101.066	2383.73	94.8448	2578.4	167.959	0.697868
	Eya4	NM_010167	208.1	6.66658	202.8	2.92632	298.067	14.4836	308.067	16.5352	0.698165
	Copz2	NM_019877	373.333	16.1314	354	12.265	534.733	16.2963	457.5	29.4198	0.698167
	Tmsb10	NM_025284	22613.1	1480.24	24493.2	752.597	32388.9	213.146	30019.3	1202.4	0.698174
	Ugp2	NM_139297	406.633	24.8994	391.1	11.3006	582.1	26.7001	547.833	4.12647	0.698562
	Kcnh2	NM_013569	216.867	16.8334	193.7	7.0812	310.4	19.2505	238.5	16.4214	0.698669
	Nedd9	NM_017464	1349.67	48.2457	1603.9	119.177	1931.53	142.105	2172.97	66.2405	0.698757
	Nhsl1	NM_173390	226.033	8.1405	241.8	8.75233	323.4	10.0167	314.433	14.7935	0.698927
	Letmd1	NM_134093	580.367	35.1181	547.033	26.7052	829.633	37.3678	696.533	27.7246	0.699547
	Rgs10	NM_026418	820.967	64.3525	622.4	66.7721	1172.67	43.6836	769.2	35.0651	0.700084
	Gstt3	NM_133994	789.1	46.3924	818.7	57.016	1126.3	80.5858	1206.5	59.7055	0.700613
	Fam134b	NM_025459	3868.27	166.096	3726.9	70.4597	5520.83	69.0129	5269.4	117.583	0.700668
	Selk	NM_019979	1941.1	177.596	2152.67	115.432	2770.07	80.3113	2555.2	74.9182	0.70074
	Amigo3	NM_177275	199.5	13.9271	200.9	8.74014	284.633	8.56978	237	8.60949	0.700903
	Map1lc3b	NM_026160	2911.9	217.016	2478.3	58.3509	4154.37	211.069	3188.23	108.962	0.700925
	-	XM_133019	5607.93	258.855	6750.97	268.446	7997	155.38	8626.6	507.36	0.701254
	Ulk1	NM_009469	276.5	11.2429	287.867	20.258	394.1	11.2926	384.367	25.1853	0.701599
	Tmem2	NM_031997	919.967	22.4161	698.033	62.4344	1311.2	87.9339	899.067	10.8812	0.701622
	Gprc5c	NM_147217	127.1	2.18251	135.633	2.92366	181	2.65393	153.9	8.64349	0.70221
	Zyx	NM_011777	18944.8	1046.97	21463	424.356	26955.7	1446.89	24888.5	1064.61	0.702812
	Flrt3	NM_178382	3539.93	193.565	2660.63	70.1738	5031.67	436.583	3994.63	225.398	0.70353
	Naglu	NM_013792	604.9	48.182	507.567	45.2761	859.7	22.6407	810.333	59.2673	0.703618
	Vldlr	NM_013703	818.667	72.7039	691.6	21.3759	1162.57	57.2243	1108.87	37.0667	0.704187
	Zfp637	NM_177684	1274.77	33.2864	1274.2	45.2115	1806.1	142.093	1807.07	95.5982	0.705814
	Arl3	NM_019718	1286.6	123.643	1157.83	86.4963	1819.43	56.9534	1630.5	76.699	0.707145
	Sh3bgrl	NM_019989	2057.83	210.921	1929.4	34.2089	2909.8	104.815	2878.67	105.273	0.707207
	Gnptg	NM_172529	2185.83	134.353	2044.93	127.812	3090.37	104.319	2777.67	114.507	0.707304
	Fscn1	NM_007984	3905.17	131.563	3760.67	101.349	5517.6	244.856	4948.63	193.98	0.707766
	Igf2r	NM_010515	1404.5	124.199	1206.7	63.148	1984.37	110.708	1550.87	120.905	0.707781
	Scoc	NM_019708	2388.13	80.7774	2544.83	34.6184	3370.43	188.948	3482.43	55.7308	0.708554
	Zeb2	NM_015753	354.467	12.5335	251.167	14.7362	500.2	6.87386	399.433	38.5749	0.708651
	Tmco3	NM_172282	306.733	23.4973	290.5	6.73077	432.8	24.4193	389.067	11.8758	0.708718
	Idua	NM_008325	239.133	4.12526	233.933	18.0098	337.3	9.83209	343.5	10.3838	0.708962
	Mme	NM_008604	128.3	2.39653	130.4	6.65157	180.933	1.80216	164.967	4.7876	0.709102
	Fbxo32	NM_026346	178.367	7.7686	176.6	6.91592	251.533	17.9727	227.667	7.28979	0.70912
	Romo1	NM_025946	2469.13	234.894	2263.7	216.96	3480.83	63.9345	3464.1	116.1	0.709351
	Trps1	NM_032000	1094.6	60.3994	934.067	16.4621	1541.83	71.6367	1166.93	69.7675	0.709936
	Ulk1	NM_009469	441.2	20.8349	452.6	25.3737	621.4	29.263	602.533	42.5482	0.71001
	Usp22	NM_001004143	1969.53	89.5808	1954.43	26.467	2773.73	164.847	2578.47	92.0458	0.710066
	Vwa5a	NM_172767	949.833	47.8904	866.667	23.7688	1336.87	48.4776	1155.9	59.0817	0.71049
	Krt17	NM_010663	117.033	4.10257	114.5	4.99032	164.6	7.07201	195.333	17.3317	0.711015
	Ndrg1	NM_008681	1283.6	63.9397	1233.77	40.5627	1803.4	148.287	1862.9	84.0124	0.711767
	-	NM_175321	225.8	19.6225	207.133	3.28955	317.233	0.600925	271.633	10.3437	0.71178
	Cdh1	NM_009864	147.7	0.90185	140.6	3.15331	207.467	3.37458	225.333	7.08198	0.71192
	Supt4h1	NM_009296	1164.1	38.314	1360.03	83.9924	1634.33	51.3115	1767.27	138.148	0.71228
	Eif2ak2	NM_011163	1881.9	98.5683	1598.5	122.314	2639.7	70.7581	2391.7	131.842	0.712922
	Fblim1	NM_133754	2180.87	102.905	1903.13	136.703	3058.53	15.4335	2817.7	225.526	0.713045
	Rgma	NM_177740	381.7	10.0351	407.267	22.5386	535.233	23.2652	453.233	11.3079	0.713147
	Nrap	NM_198059	158.567	2.627	163.5	2.73922	222.333	12.5889	213.667	7.56799	0.713196
	Vldlr	NM_013703	1153.43	83.7677	985.367	30.0742	1617.17	35.981	1598.4	53.9353	0.71324
	4933407N01Rik	NM_025745	1721.9	138.024	1617.77	24.1993	2411.57	143.07	2433.3	50.6856	0.714016
	Qsox1	NM_023268	434.967	28.1478	387.633	5.14922	609.167	15.9994	555.567	19.247	0.714036
	Taf13	NM_025444	1952.57	149.907	2333.17	94.9385	2734.1	33.8013	2726.23	104.284	0.714155
	Ppp3ca	NM_008913	2438.17	92.7453	2095.43	199.904	3413.93	108.933	2895.1	56.2285	0.714183
	4933407N01Rik	NM_025745	596.733	32.9962	588.667	30.603	835.5	46.0922	808.6	31.9714	0.714223
	4931406P16Rik	NM_172741	732.3	29.6071	731.533	24.4997	1025	39.0789	964.8	27.1912	0.714439
	Mtap7d1	NM_144941	1246.4	45.6922	1115.13	91.4383	1744.2	83.7168	1776.3	162.904	0.714597
	1810030N24Rik	NM_025471	822.9	88.6371	933.1	41.0069	1151.5	22.8541	1246.43	35.1682	0.714633
	Dlc1	NM_015802	135.533	1.01379	124.733	6.06474	189.333	6.96092	166.033	6.91408	0.715845
	Stard5	NM_023377	364.167	26.6359	374.133	22.4823	508.5	7.23809	506.6	13.5508	0.716159
	Col6a1	NM_009933	127.933	7.88381	126.5	5.58241	178.567	12.0458	148.867	1.50148	0.716443
	Il3ra	NM_008369	166	3.66652	175.8	4.24382	231.433	7.45259	221.633	9.74206	0.71727
	Tm2d2	NM_027194	2685.67	150.491	2306.53	129.02	3742.33	171.523	3403.43	85.1945	0.717646
	Pla1a	NM_134102	212.767	11.9069	199.133	11.4498	296.3	4.6694	294.967	9.32029	0.71808
	Fgfr2	NM_201601	127.467	2.05372	118.8	3.18957	177.4	2.45153	167.9	14.5445	0.718529
	Nsun3	NM_178925	191.733	1.73813	182.067	5.11251	266.767	23.9389	273.767	10.1627	0.718728
	Kdm4b	NM_172132	1190.4	31.1622	1252.3	54.7984	1655.8	87.4406	1389.3	60.5612	0.718927
	Gnaq	NM_008139	1673.27	137.94	1484.57	94.0725	2326.37	37.895	2078.13	47.7319	0.719262
	Trappc3	NM_013718	358.2	19.5594	382.467	25.0657	497.633	39.7583	534.667	16.0931	0.719808
	Tnfrsf19	NM_013869	113.267	3.56713	117.433	2.21836	157.333	8.13354	158.167	6.1553	0.719919
	-	NM_178049	2105.2	218.113	1707.2	97.0248	2923.9	58.2083	2440.87	155.053	0.719997
	Ing4	NM_133345	1467.27	166.117	1341.07	97.9442	2037.23	22.5057	1728.83	34.2746	0.720228
	Nradd	NM_026012	870.467	37.8334	826.133	28.3028	1206.9	80.1418	1081.17	3.14236	0.721242
	Lyrm2	NM_175364	478.533	31.2803	444	17.5215	663.233	27.4319	606.333	19.5389	0.721516
	Apoe	NM_009696	241.933	10.0614	201.267	12.1806	335.067	17.5306	254.133	5.9468	0.722044
	Psme2	NM_011190	970.8	19.832	953.2	53.9593	1343.93	29.9212	1215.63	74.0937	0.722359
	Spon2	NM_133903	349.8	8.94725	270.733	25.2496	483.733	34.4592	307.867	7.51273	0.723126
	Mus81	NM_027877	374.467	10.2564	538.533	16.3555	517.667	34.6291	644.6	39.5496	0.723374
	Mospd1	NM_027409	336.667	2.26004	370.567	19.2884	465.267	23.5653	478.7	22.0107	0.7236
	Axin2	NM_015732	199.8	17.2934	210.233	17.0806	276.1	4.20357	299.967	20.023	0.723651
	Ifi35	NM_027320	248.333	12.0988	231.167	12.8094	343.033	13.257	355.667	5.82018	0.723933
	Atoh8	NM_153778	203.533	14.2322	301.7	10.2211	281.133	3.21887	405.933	5.98034	0.723974
	Tle6	NM_053254	488.533	44.0903	461.6	33.8353	674.733	18.0343	490.767	15.0776	0.724039
	Fbn1	NM_007993	339.467	20.8415	356.3	19.8273	468.8	7.08872	420.933	2.57509	0.724119
	Tmem25	NM_027865	180	6.86367	168.367	6.43333	248.433	16.945	228.5	14.8947	0.724541
	Tg	NM_009375	127.867	6.79959	134.433	7.40818	176.433	17.4937	226.4	10.641	0.724734
	Slc6a8	NM_133987	768.767	23.0409	654.4	77.5017	1060.47	28.8704	954.033	60.1909	0.72493
	Taf9b	NM_001001176	170.333	12.0207	181	4.0501	234.867	2.57056	249.433	5.18406	0.725232
	Mgst1	NM_019946	256.767	19.946	194.667	16.2686	353.367	12.616	309.033	17.7672	0.72663
	Plcl2	NM_013880	501.4	40.1042	434.367	10.0655	689.667	25.7802	602.167	33.3439	0.727018
	Bgn	NM_007542	5219.67	113.767	5305.83	198.293	7176.93	46.7821	6508.63	422.365	0.727285
	Kif3c	NM_008445	162.633	9.34208	149.3	3.10859	223.6	5.8046	217.2	14.5946	0.727339
	-	XM_131683	142.5	8.25288	165.4	10.4676	195.867	16.0574	225.1	6.30238	0.727535
	Pigp	NM_019543	2762.9	325.164	2521.4	144.698	3795.87	146.994	3581.13	111.444	0.72787
	Rb1	NM_009029	464.933	4.60374	387.6	11.5154	638.267	49.3871	549.667	16.9496	0.72843
	Trappc3	NM_013718	2185	81.8612	2159.2	41.9719	2998.83	149.325	3103.63	99.7234	0.728617
	Tpp1	NM_009906	765.467	15.0834	647.633	10.5673	1050.57	41.0009	921.267	43.6343	0.728621
	Lyplal1	NM_146106	627.167	13.1191	740.567	14.4827	860.267	18.3538	882.1	8.64079	0.729038
	Rbak	NM_021326	367.8	17.7376	371.4	3.95769	504.067	4.75617	481.367	23.3085	0.729665
	Ccpg1	NM_028181	709.7	37.5075	670.267	17.3849	972.433	41.0211	816.2	48.5818	0.729819
	Cdkn1a	NM_007669	290.533	8.51906	293.4	18.9616	397.867	18.0845	450.867	24.0854	0.730226
	Nub1	NM_016736	1083.6	40.992	1086.9	47.4515	1483.33	68.9657	1389.23	12.5738	0.730518
	Mid1	NM_183151	272.267	3.93376	307.167	15.136	372.667	28.4381	421.367	11.0961	0.730591
	Zscan21	NM_001044705	394.4	2.50267	451.233	11.3702	539.8	19.7617	544.667	18.2	0.730641
	Dlgap4	NM_001042487	746.1	21.634	783.033	10.2216	1020.87	68.4814	971.3	42.6155	0.730847
	-	XM_127129	235	6.26019	245.5	2.45832	321.467	12.5688	268.367	11.1705	0.731024
	Ipo13	NM_146152	1097.5	85.3789	1106.3	39.6346	1501	51.8943	1498.97	98.0703	0.731179
	Pld3	NM_011116	479.8	18.564	425.3	19.5255	656.133	36.7866	515.767	43.8294	0.731254
	Bcl9l	NM_030256	1521.57	102.6	1374.97	9.67218	2080.7	66.765	1663.47	98.6439	0.731278
	Sepx1	NM_013759	275.9	16.691	280.4	21.1486	377.167	11.9605	407.8	5.95735	0.731506
	Mapk8ip1	NM_011162	365.867	16.1082	351.233	20.6131	500.067	19.9708	415.1	26.5259	0.731636
	Myl2	NM_010861	123.8	4.34051	104.133	2.10739	169.167	3.93968	185.467	5.01509	0.731821
	Pigp	NM_019543	2241.23	199.893	2010.5	129.774	3060.3	156.627	2854.27	138.272	0.732356
	Zfp41	NM_001044718	474.633	36.7009	519.567	27.2364	646.767	23.3622	760.567	30.0172	0.733855
	-	NM_010396	652.033	18.0245	585.967	21.6827	887.933	21.2104	1004.1	41.0742	0.734327
	-	NM_025847	862.033	40.1511	1140.1	13.2372	1172.5	24.0286	1327.33	24.0887	0.735209
	Hmgcl	NM_008254	1426.17	60.6743	1248.3	19.7122	1939.4	92.7825	1523.37	56.6201	0.735367
	Sema3f	NM_011349	877.367	81.6092	553.167	47.7601	1192.7	105.946	843.367	89.9817	0.735614
	Tnip2	NM_139064	172.067	1.61795	176.933	11.8082	233.9	8.34646	176.867	6.34937	0.735643
	Ift20	NM_018854	851.133	15.7755	657.8	24.0913	1156.43	44.6842	953.633	18.6724	0.736
	Swap70	NM_009302	786.1	22.0565	643.867	33.4762	1067.9	43.0039	849.933	30.8288	0.736118
	Med1	NM_134027	1106	29.7418	1316.3	34.2115	1501.67	50.5469	1700.9	60.4189	0.736513
	Stx5a	NM_019829	432.767	13.4405	473.733	30.0412	587.367	18.1613	585.267	12.5827	0.736791
	Zfp37	NM_009554	202.167	4.48491	246.533	12.0668	274.267	18.4234	333.833	27.381	0.737117
	Flrt3	NM_178382	282.9	24.6812	210.567	2.04151	383.767	34.2006	265.7	16.3065	0.737166
	-	XM_355444	507.3	2.21886	551.167	27.2848	688	36.1333	793.9	23.0938	0.737355
	Basp1	NM_027395	191.933	4.90249	206.467	14.4516	260.2	12.0952	311.867	23.8751	0.737636
	Bicc1	NM_031397	142.7	9.24554	136.667	6.93357	193.4	10.9715	165.467	3.38641	0.737849
	Wwp2	NM_025830	768.633	4.08588	743.833	5.54266	1041.4	12.2973	1055.5	27.0272	0.738077
	Fam128b	NM_029354	877.767	56.1212	1003.2	11.6503	1188.43	25.3064	1159	2.57099	0.738594
	Tax1bp3	NM_029564	7517.33	387.635	7618.63	301.588	10175.4	174.216	9543.13	296.884	0.738775
	Marcksl1	NM_010807	433.233	24.371	329.367	6.37974	586.367	15.559	535.433	48.9863	0.738843
	Lyrm2	NM_175364	525.833	17.4088	463.933	37.0102	711.367	13.4023	678.233	27.0322	0.739187
	Snx2	NM_026386	3694.9	322.3	3315.13	283.937	4996.23	131.684	4766.33	263.902	0.739538
	Epm2aip1	NM_175266	676.767	31.3338	718	34.5588	914.433	23.0969	756.933	20.4133	0.740095
	Ddah1	NM_026993	3359.3	218.241	3613.27	93.8559	4537.2	260.721	4748.07	128.13	0.740391
	Rbpms	NM_019733	292.467	13.9853	273.9	4.20357	394.9	13.9871	389.133	25.6519	0.74061
	D930014E17Rik	NM_020616	378.633	41.3721	358.267	20.406	511.233	20.4602	510.733	0.233333	0.740627
	Vangl2	NM_033509	745.767	72.6804	512.233	17.5771	1006.87	57.1249	676.4	63.0158	0.740679
	Pef1	NM_026441	784.267	37.302	851.6	35.0563	1058.4	57.0772	1093	54.5227	0.740993
	Sec61b	NM_024171	1076.9	48.2725	1136.97	25.0536	1452.67	63.1111	1278.9	19.9188	0.741325
	Ap3m2	NM_029505	194.267	11.6871	213.833	10.116	262.033	8.52786	256.633	10.8573	0.741384
	Mapt	NM_010838	160.033	0.48074	173.133	4.60447	215.833	4.93874	194.967	6.64488	0.741467
	Abtb1	NM_030251	321.6	10.2021	312.367	2.22136	433.467	13.4107	351	25.5508	0.741925
	H2-Q8	NM_023124	177.967	5.7074	178.267	3.08617	239.833	13.7047	309.8	21.6083	0.742046
	Gmppa	NM_133708	1015.93	18.1909	1030.63	62.9316	1369.07	64.2495	1300.5	34.2956	0.742058
	Parva	NM_020606	1410.77	59.1904	1398.9	57.9662	1900.1	80.3	1778.23	102.287	0.742471
	Grb14	NM_016719	127.733	4.4431	133.467	3.84419	171.867	0.560753	163.7	5.31131	0.743208
	Narg1	NM_053089	3902.07	207.395	4447.93	269.563	5243.87	174.348	5879.23	211.153	0.74412
	Mrpl16	NM_025606	853.7	93.5738	919.133	91.8403	1146.43	40.1284	1342.9	27.8283	0.74466
	Gpr153	NM_178406	134.467	9.45592	116.133	4.16907	180.567	13.4043	147.467	1.54955	0.744693
	Cdkn2a	NM_009877	10515.5	347.057	9354.27	801.5	14099	478.261	13757.5	898.248	0.745833
	Rab5a	NM_025887	1539.2	72.4515	1318.73	62.4902	2063	77.5071	1769.37	91.2046	0.746098
	Cdh2	NM_007664	247.533	12.9631	242.367	8.70868	331.767	15.1351	321.3	12.4649	0.746105
	Shisa4	NM_175259	262.133	15.4825	242.2	3.92471	351.333	17.0389	289.5	2.75015	0.74611
	Dtx3	NM_030714	1621.9	60.2135	1566	115.797	2172.67	102.031	1831.63	8.27875	0.746501
	Flot1	NM_008027	2882.87	87.512	2711.97	156.907	3861.17	81.7217	3511.27	64.5576	0.746631
	Gtpbp8	NM_025332	514.033	29.1727	565.433	6.86764	688.1	25.6757	805.033	39.0504	0.747032
	Commd9	NM_029635	375.033	13.1725	379.033	20.3393	501.967	20.1399	482.767	10.3499	0.747127
	Nfix	NM_010906	1157.83	65.3023	1052.3	58.3624	1549.3	69.1532	1340.2	13.2729	0.747325
	Gnptg	NM_172529	2535.2	39.5482	2392.93	119.58	3390.17	98.9465	3223	191.938	0.747809
	Itga1	NM_001033228	210.033	9.01061	190.733	4.58561	280.8	14.0082	277.067	12.4422	0.747981
	-	XM_134455	2588.1	97.3146	2721.23	124.075	3459.8	48.4711	3956.2	221.823	0.748049
	RP23-394O9.3	NM_021440	191.6	3.61156	173.267	2.79066	256	10.6782	258.533	10.202	0.748437
	Mdk	NM_001012336	16988.6	368.156	17537	492.329	22693.3	319.23	21674.5	1083.5	0.748617
	Scube3	NM_001004366	167.367	2.31036	159.067	10.4977	223.567	14.4731	198.1	6.59571	0.748621
	Osbpl2	NM_144500	871.667	65.3385	763.233	15.7751	1162.97	42.9314	950.267	12.2358	0.749518
	Il17rc	NM_134159	1483.3	89.6766	1307.33	82.5579	1978.37	50.7583	2041.4	10.0107	0.749759
	Slc39a7	NM_008202	369.1	24.1961	333.3	15.77	492.167	23.6204	448.267	27.6541	0.749949
	Cenpt	NM_177150	1450.03	46.8403	2237.33	121.641	1933.1	57.2946	2938.87	156.455	0.750106
	Nudt4	NM_027722	3402.5	109.953	3325.7	182.986	4533.57	151.309	4438	65.5971	0.750512
	Gamt	NM_010255	406.8	10.1887	313.867	25.6335	541.5	15.273	351.367	28.6859	0.751247
	2310005E10Rik	NM_172398	1060.3	12.4516	963.7	12.813	1410.57	22.6171	1318.53	14.3232	0.751682
	Vldlr	NM_013703	832.367	80.5207	681.833	9.06446	1107.27	52.1795	1115.7	45.5059	0.751729
	Il17rc	NM_134159	748.667	40.1906	734.8	43.2541	995.9	31.1337	960.733	4.53738	0.751749
	Sec16b	NM_033354	339.167	6.69859	391.6	2.34592	451.133	2.64344	432.2	14.7453	0.751812
	Tmem136	NM_001034863	228.3	17.1555	237.433	21.5902	303.5	9.00907	326.1	10.4886	0.752224
	Tmem2	NM_031997	1319.67	158.491	1028.57	71.968	1753.53	36.4903	1267.63	39.9962	0.752579
	Ripk2	NM_138952	313.067	2.8881	251.067	14.8279	415.967	9.99272	377.367	11.4171	0.752625
	1200002N14Rik	NM_027878	160.433	4.32294	178.967	3.40653	213.133	6.58846	208.567	12.3018	0.752737
	Lima1	NM_023063	4186.37	117.658	3948.47	208.099	5561.43	396.447	4977.33	84.0312	0.752751
	-	XM_135820	612.867	47.7376	461.033	56.5725	814	43.8662	588.333	34.8885	0.752908
	Epha1	NM_023580	128.833	6.76888	121.967	3.07752	171.067	6.11046	162	4.35928	0.753114
	Tcn2	NM_015749	330.233	13.5376	294	19.1366	438.467	6.90032	385.067	9.00302	0.753154
	Rras	NM_009101	1630.07	41.9734	1479.33	12.9489	2164.1	81.3697	2199.07	98.2746	0.753232
	Cxcl10	NM_021274	112.667	2.29226	141.6	2.0108	149.567	2.77208	188.1	6.46452	0.753288
	Serf2	NM_011354	8059.3	700.87	7755.03	250.03	10697.4	309.512	9701.9	276.145	0.753389
	Trappc3	NM_013718	470.5	31.7297	471.833	19.6194	624.3	39.243	633.567	11.521	0.753644
	Alg2	NM_019998	323.967	5.31204	322.3	4.28291	429.7	11.3271	381	14.5452	0.753938
	Ift20	NM_018854	3266.37	197.68	2780.37	63.7527	4330.1	116.429	3568.57	66.9922	0.754341
	Ift122	NM_031177	562.133	9.27907	555.1	12.9701	744.967	14.7642	634.633	26.01	0.754574
	Wdfy1	NM_027057	187.533	7.44879	200.767	7.59481	248.5	8.22456	204.633	4.62073	0.75466
	Emd	NM_007927	734.333	16.9741	730.8	30.8705	973.033	10.9688	1167.07	45.3117	0.754685
	Wdr6	NM_031392	2993.13	194.978	2712.1	210.193	3962.7	145.999	3353.77	124.44	0.755326
	Vkorc1	NM_178600	812.767	12.9288	769.633	35.6226	1075.2	74.3645	971.6	36.088	0.755922
	Ssbp2	NM_024186	535.433	25.4077	651.5	34.1749	708.133	8.51202	800.033	20.9336	0.756119
	Dapk2	NM_010019	2381.73	25.1816	2275.43	111.393	3147.23	7.85373	3210.57	137.558	0.75677
	Slain2	NM_153567	1190.8	37.3118	1108.33	64.204	1573.3	94.7321	1587.77	64.1372	0.75688
	Tbrg1	NM_025289	2213.77	107.731	2278.77	64.5971	2923.17	159.201	3120.57	42.2793	0.757318
	E130308A19Rik	NM_001015681	165.033	13.5825	155.7	2.05994	217.5	4.25323	202.2	7.17658	0.758772
	-	XM_109794	211.333	7.10923	208.5	10.7037	278.467	6.30141	229.567	8.74115	0.758916
	Usp18	NM_011909	118.167	4.69338	111.6	6.85055	155.6	4.33128	170.467	12.6797	0.759428
	Slc25a45	NM_134154	201.9	11.7645	195.9	2.96704	265.8	6.09289	249.967	1.59304	0.759594
	Mpnd	NM_026530	1435.4	8.65698	1399.83	38.9318	1889.67	67.865	1660.73	110.413	0.759604
	Nr2f2	NM_183261	369.633	13.547	381.733	18.7812	486.533	9.13242	438.067	16.4638	0.759729
	Tmem77	NM_026013	566.333	13.3097	691	25.4006	745.067	27.153	901.833	35.4068	0.76011
	Flrt3	NM_178382	4013.9	186.678	2818.5	63.9847	5277.67	19.5322	4236.63	244.206	0.760544
	Mfap5	NM_015776	104.6	3.93107	114.4	3.96274	137.533	8.49163	140.167	3.5788	0.760545
	Acadm	NM_007382	5339.83	363.254	5025.8	231.805	7020.87	136.632	6287.4	201.042	0.760565
	Cd40	NM_170702	124.467	2.49355	128.567	0.272845	163.633	12.2739	172.8	8.60484	0.760647
	Trappc3	NM_013718	542.033	46.5194	471.9	46.0423	712.367	36.1159	770.667	21.1536	0.76089
	Ndufs2	NM_153064	1722.13	127.823	1713.83	31.94	2262.9	82.2981	2253.87	33.6797	0.761028
	Ppic	NM_008908	2839.57	62.9429	2746.57	167.453	3728.57	56.2566	3744.97	124.769	0.761571
	Mmp16	NM_019724	242.767	6.48314	202.267	14.4003	318.667	13.5981	270.733	17.2324	0.76182
	Smtn	NM_013870	375.9	30.5413	751.533	46.9601	493.333	19.7844	811.967	24.4247	0.76196
	Fxc1	NM_019502	646.633	22.5829	764.3	33.9618	848	2.91433	910.9	50.065	0.762539
	Rxrb	NM_011306	1071.3	41.5695	1116.2	30.0495	1404.87	54.1755	1423.53	45.9408	0.762562
	Zfp68	NM_013844	1232.67	28.9676	1215.63	45.5771	1616.27	72.0764	1730.87	92.7569	0.762663
	Fjx1	NM_010218	126.367	2.10581	112.333	8.2228	165.667	3.84375	143.333	0.829324	0.762777
	Arfgap3	NM_025445	569.8	41.4399	549.333	23.4126	746.433	25.6095	704.5	19.4423	0.763364
	Ptprv	NM_007955	128.167	1.2441	131.233	4.97538	167.867	3.77065	129.767	4.44685	0.763503
	Nkain1	NM_025998	209.5	8.80019	196.633	6.6021	274.367	14.6438	218.6	12.8827	0.763576
	Itga9	NM_133721	158.467	7.03096	163.467	4.53076	207.467	3.46234	177	4.48144	0.763818
	Tmco3	NM_172282	290.1	15.9982	271.667	13.0841	379.6	9.75107	374.6	11.3459	0.764226
	Tnfrsf11b	NM_008764	107.9	3.60185	116.167	4.05887	141.167	8.19946	145.767	6.68439	0.764343
	Nxn	NM_008750	10471.7	535.613	10224.1	194.178	13686.8	256.246	11706.2	563.837	0.765095
	Wdr68	NM_027946	3708.53	254.352	4950.73	80.527	4845.7	239.877	5857.07	107.438	0.765324
	Dstn	NM_019771	15651.6	905.329	16164.8	875.592	20449.6	1082.08	21008.9	255.139	0.765374
	Cdkn1a	NM_007669	743.067	41.2341	617.6	9.0644	970.633	25.283	1101.43	70.3949	0.765549
	Lyz1	NM_013590	123.9	1.64418	130.533	2.78648	161.833	5.95996	172.567	2.94241	0.765604
	1810031K17Rik	NM_026977	151.4	6.37913	160.667	5.06041	197.5	11.9215	205.767	5.33833	0.766582
	Ilk	NM_010562	744.933	62.2021	882.333	21.6353	971.5	32.1727	1052.67	28.3221	0.766786
	Nppa	NM_008725	113.233	3.55637	117.667	3.34979	147.633	6.1974	137.367	1.89062	0.76699
	Prkx	NM_016979	1031.13	46.3751	981.9	53.4747	1344.37	44.6238	1258.27	48.2917	0.766999
	Cmpk2	NM_020557	229.167	15.7617	231.867	23.8251	298.767	13.8882	443.067	11.2653	0.767043
	Atp6v0e2	NM_133764	257.133	15.5187	246.633	18.2311	335.2	6.76042	333.467	4.55351	0.767103
	Mobkl2b	NM_178061	148.1	9.79047	156.5	1.35031	193	6.40859	176.6	4.83839	0.767358
	Lamc3	NM_011836	117.2	2.07445	119.667	3.92018	152.7	11.65	154.367	3.6094	0.767518
	Zscan21	NM_011757	249.833	8.94992	283.633	6.08011	325.467	5.65401	338.867	22.9501	0.767614
	Kcnh2	NM_013569	179.2	3.53034	154.867	8.25274	233.367	9.53596	202.1	11.201	0.767889
	Fbxo25	NM_025785	930.967	55.612	868.1	42.2756	1212.27	7.40188	1067.07	27.0003	0.767954
	Slc5a5	NM_053248	108.233	1.45182	118.833	3.59738	140.833	6.55371	127.767	1.63333	0.76852
	Ndufa7	NM_023202	8802.93	214.239	9550.03	548.259	11450.8	413.892	11448.8	128.066	0.768761
	Cetn3	NM_007684	10038.8	657.591	9818.4	245.513	13052.9	538.801	12647.2	421.291	0.769086
	Ctsa	NM_008906	179.967	2.49087	185.8	3.78726	233.967	5.82819	241.933	5.584	0.769198
	Ak3	NM_021299	1457.13	42.1531	1172.77	60.043	1894.23	88.2768	1370.6	82.4626	0.769247
	App	NM_007471	5926.8	543.122	5250.77	129.033	7700	331.85	7321.67	237.433	0.769714
	Fam40a	NM_153563	4714.97	73.0161	5156.8	217.388	6122.97	300.368	6349.93	182.291	0.770046
	Podnl1	NM_001013384	125.6	2.62298	126.733	7.22619	162.9	7.2037	154.6	4.21426	0.771025
	Cyhr1	NM_180962	932.667	40.4141	834.967	48.1334	1209.5	62.5415	974.6	41.6626	0.771118
	A2bp1	NM_021477	113.467	4.06708	116.5	2.69072	147.133	2.61683	140.233	4.66702	0.771187
	Faim	NM_011810	1105.7	61.3376	1064.33	59.707	1433.5	14.3396	1403.2	35.5172	0.771329
	C130022K22Rik	NM_172730	864.467	10.7617	1074.2	25.06	1120.67	6.5244	1260.07	61.648	0.771384
[truncated: 2,067 more rows]
